# Supplementary material for: Genome-Wide Identification and Expression Analysis of CsCaM/CML Gene Family in Response to Low-Temperature and Salt Stresses in Chrysanthemum seticuspe
Source: MDPI journal article supplement (doi:10.3390/plants11131760), 2022-07-01
Supplement: s1 [file s1]

>CsCML1

ATGATGAGTGAATCCAATGATTCTTCGAGATGGAGTACATTAACATTGGAAGAAAAAGT  
GTGTGGTGCATTAGTCCCATT  
ATTGGCTTTTGCTGAGATTATTTTGTCTTTTCTGGCTGCTTTGATTTTGGTGGTGCT  
AAGAAGCAAAATAAGCACA  
AGCTGCTTCCTTTTGATCATCATCAGCTTACAAGACTTGCTTCTGGATCTAATTTTAATG  
TAAATGAAGTTGAGGCGCTT  
TTCGAACTGTTTAAGAGCCTGAGTTCGTCTATCATCGACGATGGATTGATACACAAGGA  
GGAGCTTCGATTAGCACTATT  
CAATACCCCTCAGGGTGAAAATCTGTTTTTGGATCGGGTTTTTGATCTTTTTGACGAGA  
AGAGAAATGGTGTAATTGAAT  
TCGAGGAATTTGTCCATGCTCTCAGTATCTTCCATCCGTATGCACCTATAGAAGATAAAA  
TAACTTTGCTTTTAGGCTC  
TATGATCTAAGACAAACGGGGTATATAGAGCGAGAAGAAGTCAAACAGATGCTAATAG  
CAATATTAACAGAATCCGAGAT  
GAACTTATCAGATGACCTTCTTGACGTTATTATTGACAAAACATTTGCTGATGCGGACA  
CTGATGGAGATGGTAAATCT  
GTAAAGAGGAATGGAAAGAGTTTGCCTCAGATACCCGAGTCTTTTAAAGAACATGAC  
TCTTCCTTATCTAGCGGACATC  
ACAACAGCATTTCCAAGTTTTGTTTTTCACACGTCGGTGGAGGATGCAACATGA

>CsCML2

ATGGGCTGCTTTCATTCTACTGTAAAAAAACCGGTTCCCTGGGCATGAAAATCCGACTTT  
ACTTGCTTCTCAAACAGCCTT  
TAGTGTAAGTGAAGTTGAAGCTCTATTTGAGCTATTCAAGAGCATAAGTAGTTCTGTAA  
TCGATGATGGGTTGATTAATA  
AGGAAGAGTTCCAACCTAGCATTATTCAAGAACAGAAAGAAAGAGAATCTCTTTGCAA  
ACAGGATATTTGATCTTTTCGAC  
GTCAAGCAGAAGGGGTTATTGATTTTGGTGACTTTGTTAGAGCACTTAACGTTTTCCA  
TCCTAATGCTCCTCAAGAAGA  
CAAGATCAGTTTTTGTTCAGCTTTATGATATGGACGGAACAGGATTCATAGAGCGCC  
AGGAGGTTAAGCAAATGTAA  
TCGCACTTTTATGTGAGTCGGAGCTAAAGCTAGCTGATGACACCATTGAGACAATACTT  
GATAAGACGTTTTTCAGAAAGCC  
GATGTAGACCAGGATGGGAAGATAGACAAATCAGAATGGCACAATTTTGTACCCACA  
ACCCTTCCTTGCTCAAATAAT  
GACTCTTCATATCTAAGGGATATTACAACCACCTCCCAAGTTTTGTGTTCAATTCTGA  
AGTTGAAGAAATTGCAACAT

AA

>CsCML3

ATGGGCTGCTTTCATTCTACTGTAAAAAAACCGGTTCCCTGGGCATGAAAATCCGACTTT  
ACTTGCTTCTCAAACAGCCTT  
TAGTGTAAGTGAAGTTGAAGCTCTATTTGAGCTATTCAAGAGCATAAGTAGTTCTGTAA  
TCGATGATGGGTTGATTAATA  
AGGAAGAGTTCCAACCTAGCGTTATTCAAGAACAGAAAGAAAGAGAATCTCTTTGCAA

ACAGGATATTTGATCTTTTCGAC  
GTCAAGCAGAAGGGGGTTATTGATTTTGGTGACTTTGTTAGAGCACTTAACGTTTTCCA  
TCCTAATGCTCCTCAAGAAGA  
CAAGATTAGTTTTTTGTTTCAAGCTTTATGATATGGACGGAACAGGATTCATAGAGCGCC  
AGGAGGTTAAGCAAATGCTAA  
TCGCACTTTTATGTGAGTCGGAGCTAAAGCTAGCTGATGACACCATTGAGACAATACTT  
GATAAGACGTTTTTCAGAAGCC  
GATGTAGATCAGGATGGGAAGATAGACAAATCAGAATGGCACAATTTTGTACCCACA  
ACCCTTCCTTGCTCAAGATAAT  
GACTCTTCCATATCTAAGGGATATTACAACCACCTTCCCAAGTTTTGTGTTCAATTCTGA  
AGTTGAAGAAATTGCAACAT

AA

>CsCML4

ATGATAGAGAAGATAGATGTGAACAATGATGGATGTGTTGACATTGATGAATTTGGTGA  
GTTGTATAAAAGTATCATGGA  
TGATCGTGAGAATGAGGAGGATATGATGGAGGCTTTTAATGTATTTGATATAAATGGAG  
ACGGGTTTATCGCGGTTGAGG  
AGCTTAGAGCGGTTTTGGAGTCTTTGGGGCTGAAGCAAGGCCGAAAAGCCGAAGATT  
GTAGGAAAATGATCATGAAAGTT  
GATGTGGATGGTGATGGTATGGTTAGTTTTGATGAGTTTAAGGAAATGATGAGATCAGG  
TGGCTTTGCTGCTATGGCTCA

AAATTGA

>CsCML5

ATGTTTGACAAAAATGGCGATGGAAGGATCACAAAGCAAGAACTAAATGATTCCTTAG  
AGAACATGAACATTTACATATG  
TGACAATGATCTTGACACATGATAGAGAAGATAGATGTGAACAATGATGGATGTGTTG  
ACATTGATGAATTTGGTGAGT  
TGTATAAAAGTATCATGGATGATCGTGAGAATGAGGAGGATATGATGGAGGCTTTTAAT  
GTATTTGATATAAATGGAGAC  
GGGTTTATCGCGGTTGAGGAGCTTAGAGCGGTTTTGGAGTCTTTGGGGTTGAAGCAAG  
GCCGAAAAGCCGAAGATTGTAG  
GAAAATGATCATGAAAGTTGATGTGGATGGTGATGGTATGGTTAGTTTTGATGAGTTTA  
AGGAAATGATGAGATCAGGTG  
GCTTTGCTGCTATGGCTCAAAATTGA

>CsCaM1

ATGGCAGATCAGCTCACCGATGATCAGATCTCTGAATTCAAAGAAGCTTTTAGCCTATT  
TGATAAAGATGGCGATGGTTG  
TATCACAACCAAGGAACTCGGAACAGTTATGAGGTCTCTAGGACAAAACCCAACCGA  
GGCTGAGCTTCAAGATATGATCA  
ACGAAGTCGATGCTGATGGCAACGGTACTATTGATTTCCCTGAGTTTCTCAACTTGATG  
GCCCGAAGATGAAGGACACT  
GATTCTGAGGAAGAGCTCAAGGAGGCTTTCCGGGTTTTTGACAAGGACCAAAATGGTT  
TCATATCTGCGGCCGAGCTTCG  
TCACGTCATGACTAATCTTGGTGAGAAGTTGACAGATGAGGAAGTCGATGAGATGATC

CGTGAAGCTGATGTGGACGGTG  
ATGGCCAGATCAACTATGAGGAATTCGTCAAGGTCATGATGGCTAAGTGA  
>CsCML6  
ATGTGTCCCACAGGAAGCTCTTATACCCCTAGCAACGAAACAAGCCGAAGTACGATCAG  
CATTCAACGTCATGGACGTCGA  
CCATGATGGCAAAATAAGCCACGACGATCTAAAGCGTTTTTACGCAGACTACGCGGTA  
AATGACAATGAAATTATCATAG  
GAACAATGATGAAGGAGACGGATTTGAATAAAGACGGGTACGTTGAATACGAAGAGTT  
TGAAAAAATGTTGTTTCTTAGG  
AGAAGTAGTAATGTGATGGAAGAAGTGTTTAATGAAATAGATAAAGTTGGTGATGCTAA  
TGATGATGAGAATGATGGTGT  
TACTTTTGAAGGGTTTCTTAAGATATTAGCCATTTGA

>CsCML7  
ATGAATACGTCCCGTCCCTGTCCTTCTCTCAAGTCATTATTCTACGAAGTTGGAGGAAT  
GCTCCGATGTTGCAATTCCAC  
AAATGAGTACGAGAGGCTGGACAGTGAGCTCGAGAGGAAAATGATAGAGGTCAAGAA  
AAGATATGTACCAGGAAATAGCA  
GCATCAGGTCCATCAACAGCATTATTCTGAAGTTTCCTCAGTTCAGACAAGGATTGGAA  
GAGATTAGAGGCGTTTTTCGA  
CAGTTTGTGATGTTGATTCAAACGGAACCATCGACCGTGAGGAGTTAAGAAAATGCTTAC  
ACAAATTCCAATTCGACTGCAC  
AGAGGACGAAATTAATGACCTTTTTGAGTCTTGTAACCTGGGCAGGAATCAAGGCATG  
AAATTTAACGAGTTTATCGTTG  
TCTTATGCCTTATCTATCTCCTTACATGTACCTCCTCTTCAAACCATACTGCGACAACAAT  
GGGATCACCAGAGCTCAA  
TCAACATTTGATACCATAATTGAAGCGTTCTTATTTCTTGATAAAAATGGTGATGGGAAA  
CTAGACAAGAAGGATATGAC  
TAAAGCTATGAACGATGATTTTCCTAAGGAGAAATCTCCGAATCACATCACCATGTCAC  
GATTCAGAGAAATGGACTGGA  
ACAAGGATGGGAAAGTCGGCTTCAGGGAGTTCCTATTCTCCCTGATCAATTGGGTTGG  
GATCGACTCCAATAATGAAGTT  
CATGTCGAAGTAATCCGAGAACAGAAACCGTGA

>CsCaM2  
ATGGCCGATCAACTACCGATGATCAGATCTCTGAGTTCAAGGAAGCTTTCAGTCTATT  
CGATAAAGATGGAGATGGTTG  
TATCACTACCAAGGAGCTTGGAACAGTTATGAGGTCTCTTGGACAAAACCCACGGAG  
GCTGAACTCCAAGACATGATCA  
ATGAGGTCGATGCTGATGGAAACGGTACTATTGATTTCCCTGAATTTCTTAATCTGATGG  
CCAGGAAGATGAAGGACACT  
GACTCTGAGGAGGAGCTTAAGGAGGCTTCCGTGTTTTCGACAAGGACCAAAATGGC  
TTCATTTCTGCAGCTGAGCTACG  
TCATGTTATGACAAATCTTGGTGAGAAGCTGACTGATGAGGAAGTTGATGAGATGATCC  
GTGAAGCTGATGTGGATGGTG  
ATGGTCAAATCAACTATGAGGAATTCGTCAAGATCATGATGGCCAAGTGA

>CsCML8

ATGAAGTTTTCTCAACATCTAATGTTTCCATCCCGTTTTTCGCTTGAGCGCTCCGAGATT  
TTGGTCGTTAAGCATGATTC  
CAACTTGTCAAAAGCACACGTTTCCTTCACCAACAAGAACATTGTGGACGATGCATGT  
GTCCAAAGAGACGACGTGGAGC  
TAATAATGGCGAATTTAGGTGTTTTTGGCATCCTGAAGGCGAGAAGGTGCCCCGAGGT  
GATGACTTCTAATGACTTGTTT  
AATATTTTTGAAGATGAGCAACCAAGGTTGGATGAAGTGAAACAAGCTTTTGATGTGT  
TTGATCAAAACAAAGATGGGTT  
TATTGATGCAAGTGAGTTGCAACGAGTTCTTGTTGTTTTGGGCTTGAAGGAAAGATCG  
AATATCGAAGATTGTAGGAAGA  
TGATCCGAGCGTTTGATGAGAACGCCGATGGTAGGATAGATTTTGATGAGTTTGTTAAG  
TTTATGGAAGCTACCTTTTGT  
TGA

>CsCML9

ATGTTCCAGCCAGACGTCGATGAAATGAGACGAGTTTTCAACAAATTTGACAAGAACA  
AGGACGGTAAGATATCCAAGGA  
AGAGTATGGTTCGGCCGTTGGAGTACTTGGTAGCAAAAACACTAAATCAGACGTGATC  
AAGACGTTTCAAGCCATAGACA  
CTGACGGGGACGGGTTTGTGGACTTTAATGAGTTCATGGAGGCTCAAAGTCGGAAG  
GTGGTGTTAAGACAGCGGATATA  
AAGAGTGCGTTTAAGGTTTTTGATTGGATGGCAATGGGAGAATAACAGCAGAGGAGC  
TTGTTCAAGTGCTGAGGCAGTT  
AGGAGAGAGGTGCAGCTTGGAGTCTTGCCGAAAAATGATTAAAGGGGTCGATGCAGA  
TGGGGATGGAATGATCGACGTTG  
ATGAATTCATGGGTCTAATGACCCGTAACATGAAACTGGCATAA

>CsCML10

ATGGCAGATGCTGATCATCAAGCGAACCTTGAACGAATCTTCAAGAAATTTGATACCA  
ATGGAGATGGCAAGATCTCATC  
ATCAGAGCTTGGAGAAGCTTTGAAGACGCTCGGCTCTGTGTCACCTGAAGAAGTGCA  
ACGTATGATGCGTGAAATCGATA  
CTGATGGAGATGGATTTATTTCTTATCAAGAATATATAGATTTTGTAAATGCTAACAAGG  
GGTTAATGAAGGACGTTTCC  
AAGATCGTATAA

>CsCML11

ATGGCTGATGAAGACAAGGCAGAATGTGATCGCATCTTTGGCGCATTTGATAAAAATG  
GAGATGGTAAGATCTCTGCAGC  
TGAGCTTGGAGAATCTTTGACGAAGCTCGGCTCTGTGTCACCTGAAGAGGTCCAAACT  
ATGATGGATGAACTTGATACCG  
ATGGAGATGGAAACCCTAGCATTAGCCTCGGCTATAAAAGGAACTCTAATCCTATCATA  
AGGGTTTCAATCCATCACTTG  
GTTTAG

>CsCML12

ATGTCTATAATGATAGCTGAATTTATCCAATACTTGTTCTCCCATGTGTTTCTCAACATGA

TCATCTACCCACAACCTCGG  
GTATTTCTTGGATGACTCCAAGATTCATGTTGAGAAGAGGAACAAAGATTCTAGATTGC  
CGAAAAGGTTGCCTTCATTTA  
AAGACGGAAGTGTACGAGGAGACGAAGTGCAGACGGTTATGGGGAACCTTGGAATCT  
TTTGCAATTCTAAAGGGGAAAGC  
TTTCCAGAGAGATTAAAGTTCTAACGATCTTTTTAACATGTTTGAAGAAGAGCATCCGGA  
ATTGGATGAAGTGAAGGGAGC  
TTTTGACGTGTTTGTATGAGAATAAAGATGGGTTTATTGATGCAAAAGAGTTGCAGAGA  
GTTTTATCTGCTTTAGGATTGA  
AGGATAGAGCAGCTATGGATGACTGCAAGAAGATGATCAGAGTGTTTGTATGAAAACGA  
TGATGGTAGAATAGATTTTGAT  
GAGTTTGTCAAGTTCATGGAAGGCACATTCTGTTGA

>CsCML13

ATGGATAAAGAACAACAATACAAACGTGTGTTTGGACACTTGGATGCAAATGGTGACG  
GAAAGCTATCTCCACCAGAGCT  
CCAAATTTGTCTTGGAAGATTGGAGGAGAGTTGTCATTGGAGGAAGCTGAGATCGCG  
GCTGCTTTGATGGATTTCGGATG  
GGGACGGGTTGTTGAGCATGGAGGACTTGGTGAATGTGGTTGAAAGTGCAAACGAAG  
AGGAAAAGATTGATGATTTGAAG  
ATGGCTTTTAAGATGTACGAAGAAAAGGAAGGATGTATAACTCCGAAAAGCTTGCGAA  
GAATGCTTAGCAAACCTGGGAGA  
GTCGAGAACCGTCAATGATTGCAAGGTGATGATTAATAAGTTTGATGTTAATGGTGATG  
GTGTCCTTAACCTTCGATGAAT  
TCAGGATAATGATGGCATGA

>CsCML14

ATGGATAAAGAACAACAATACAAACGTGTGTTTGGACAATTGGATGCAAATGGTGACG  
GAAAGCTATCTCCACCAGAGCT  
TCAAAGTTGTCTTGGAATAATTGGAGGAGAGCTGTCATTGGAGGAGGCTGAGATCGC  
GGCTGCTTTGATGGATTTCGGATG  
GAGACGGGTTGTTGAGCATGGAGGACTTGGTGAATGTGGTTGAAAGCGCAAACGAAG  
AGGAAAGGATTAATGATTTGAAG  
ATGGCTTTTAAGATGTACGAGGAAAAGGAAGGATGTATAACTCCGAAAAGCTTGCGAA  
GAATGCTTAGCAAATTGGGAGA  
GTCGAGAACCGTCAATGATTGCAAGGTGATGATTGCTAGGTTTGATGTTAATGGTGATG  
GTGTCCTTAACCTTCGACGAGT  
TCAGGATAATGATGGCATGA

>CsCML15

ATGGATAAAGAGCAACAATACAAACGTGTGTTTGGACACTTGGATGAAAATGGTGACG  
GAAAGCTATCTCCACAAGAGCT  
CCAAATTTGTCTTGGAAGATTGGAGGAGAGCTGTCATTGGAGGAGGCTGAGATCGCT  
GCTGCTTTGATGGATTTCGGATG  
GAGACGGGTTGTTAAGCATGGAGGACTTGGTGAACCTGGTTGAAAGCGCTAACGAGG  
AGGAAAGGATTAATGATCTGAAG  
ATGGCTTTTAAGATGTACGAAGAAAAGGAAGGATGTATAACTCCGAAAAGCTTGCGAA

GAATGCTTAGCAAATTGGGAGA  
GTCGAGAACCGTCAATGATTGCAAGGTGATGATTGCTAGGTTTGATGTTAATGGCGATG  
GTGTCCTTAACCTTCGAGGAAT  
TCAGATTAATGATGGCATGA

>CsCML16

ATGGATAAAGAACAACAATACAAACGCGTGTTTCGGACAATTGGATGCAAATGGTGACG  
GAAAGCTGTCTCCATCAGAGCT  
CCAAATTTGCCTTGGAAGATTGGAGGAGAGCTGTCCTTGGAGGAGGCCGAGATCGC  
GGCTGCTTGGATGGATTTCGGATG  
GAGACGGGTTGTTAAGCATGGAGGACTTGGTGAATGTGGTAGAAAGTGCTAACGAGG  
AGGAAAGGATTAATGATCTGAAG  
ATGGCTTTTAAGATGTACGAAGAAAAGGAAGGATGTATAACTCCGAAAAGCTTGCGAA  
GAATGCTTAGTAAATTGGGAGA  
GTCGAGAACCGTCAATGATTGTAAGGTGATGATTGCGAGGTTTGATGTTAATGGTGATG  
GTGTCCTTAACCTTCGACGAAT  
TCAAGATAATGATGGCGTGA

>CsCML17

ATGGACAAAGAACAGCAATACAAACGCGTATTTGGGCACCTGGACACAAATGGAGAC  
GGGAAGCTATCTCCTCCTGAGCT  
CCAAATTTGCTTTGGGAAGATTGGTGGAGAATTGTCATTGGAGGAGGCTGAGATAGCA  
GCTGCTTTGATGGATTTCGGATG  
GAGACGGATTGCTAAGCATGGAGGACTTGGTACAAGCGGTTGAGGGCGCTAACGAAG  
AGGAAAAAATTAATGATTTGAAG  
ATGGCTTTTAAGATGTATGAAGAAAAGGAAGGGAGTGGATGTATAACTCCGAAAAGCT  
TGCGAAGAATGCTTAGCAAGTT  
GGGAGAGTCAAGAACCGTCAATGATTGTAAGGTGATGATTGCTAAGTTTGATGTTAATG  
GTGATGGTGTCTCCTCAACTTCC  
ACGAATTCAGGGAAATGATGGTGTA

>CsCML18

ATGGACAAAGAACAACAATACAAAAGTGTGTTTCAGACACTTGGACAAAAATGGAGAT  
GGGAAGCTATCGCCACCGGAGCT  
CCAAACCTGCATTGGAAAGGTTGGTGGAGAGTTGTCACTGGAGGAAGCCGAGATGGC  
AGCTGCTTTGATAGATTTCAGATG  
GAGACGGGTTGTTGAGCATGGAGGACTTGGTGAAAGTGGTCGAAGGTGCAAACGAAG  
AGGAAAAAATTAATGATTTGAAG  
ATGGCTTTTAAGATGTATGAAGAAACGGAAGGGAGTGGATGCATAACCGCGGAAAGCT  
TGAGAAGAACGCTTAGCAAAT  
GGGAGAGTCGAAAACAGTTGATGATTGTAAAATAATGATTGCTAAGTTTGATGTTAACG  
GTGATGGAGTCCTCAATTTTG  
ACGAATTCAGGGAAATGATGGCGTGA

>CsCML19

ATGGCAACTGAAACAACAACCCCTACCACAACCTACCCAACAAACATCATCATCAGTGA  
ACCTAACCAACATCGAAGAAGT  
AAAGAAAGTATTCAACCGTTTCGACACCAACCACGACGGCAAGATCTCATCTTCGGAG

CTCATCTCCATCATGAAATCCC  
TCGGATCCAACATCTCAGAGGACGAAGTCAGACAAATGATGACCAAGATTGACACTGA  
TAACGACGGGTGCATAACCCCTG  
GAAGAATTTGCAGGGTTTTGTAAAGATGATACTGCTGATGATGGGGGAATGAAGGAGT  
TGCATGAAGCTTTTGAGCTTTA  
TGATTTGAATAACAATGGTTTGATTAGCTCTAGTGAGTTGCATCAGATTTTGACGAGGT  
TGGGTGAGAGTGTGAGCGTTG  
AGGATTGTGTTGGGATGATTAAGTCTGTTGATGCTGATGGTGATGGCTTTGTAACTTT  
GAGGAGTTTAAGAAGATGATG  
AGTAATGGCAAGACTGAGCCGTAG

>CsCML20

ATGGGTTTAAAAAATTTGTTCAAGGGTAAAAAAAAATCAACCCAGAACAACAACAAC  
GTGGTCGTGGGTGTTGCTGTTAG  
AAATCCAAACAATACATCATCGCCAGTTCTTTTCGCGATCAAGCTCGTGCAACTCACGTG  
CTCGGATCGAGGAAGAACTAA  
CGCAAGTTTTCAGAAAATTCGACGTAAACGGAGACGGAAAGATCTCCGCCTCCGAAC  
TGGGATCAATAATGGGGTCCCTG  
GGCCAAAACCCACAGAAACCGAGCTCGAAAACATGATCAAGGAAGTTGATGCTGAT  
GGGGATGGGTTCATAGATTTGCA  
TGAATTCATTGCTCTTAATACTAAAGATATCGATTCAAATGAGCTTTTGGAGAATCTAAA  
AGAAGCCTTTTGTGTATTCTG  
ATATTGATAAGAATGGTCTATAAGTGCTGAAGAGCTGCAGAAAGTTTTGGGCAGGTTG  
GAAGAAAGCTGCACCATTGAA  
GAGTGTAGGAAAATGATTAGTGGTGTTGATGTTGATGGAGATGGTATGATTAGTTTTGA  
TGAGTTTAAGGTTATGATGAT  
GAGTGGTAATGGGTTTGTGTCTAAGAAGAATAATAACCGAGAGATGAAGGAAGAATAA

>CsCML21

ATGAGCAAAGTGTGAGTAATACTCTACATTACAGTAGCCATACTAATCCTCATTCTAATC  
TCCAACAAAAACACCAACAA  
CACCTCCTCCAACCGCCACAACCGCCGCCACCGCCGCCTCAAGCTCCGCTCAAACCTC  
ACCACCACCCCATACCCACCA  
CCCCCATACCCACCACCCCATCAGATCACCATATCTCATTTGACCCCTTATCGCAGACA  
TTGAACGTAAACGTGAAGAC  
AAACAATGGGAACAAACCCATTACTTTAATAAGGACCATGGTGATGTTTCATGATCATGG  
TGGTGATGACGTGGCACCTGG  
AATGGAGGGACAGCCAGAATGGGAGGATTTTATAGATGCTGAGGATTATTTGAATGATG  
AGCATAAGTTTAATATTACGC  
ATAGGTTGGTGTTGTTGTTTCCCAGGATTGATGTTGATCCTGCTGATGGGTTTGTTCGG  
AGCATGAGTTGACGCAGTGG  
AACTTGGAGCAGAGTCAGAGGGAGGTGTTGCATAGGAGCCAGAGGGAGATGGAGCTG  
CATGATAAGAATCGGGATGGGTT  
GGTTAGTTTCCACGAGTATTCGCCGCCTAGTTGGGTGAGGGATACAGATAATAACTCAT  
TTGGGTATGATATGGGTTGGT  
GGAAAGAGGAGCATTTCAATGCATCTGATATTGACGGTGATGGTTTTTTGAATTTGACC

GAGTTCAATGACTTTCAGCAT  
CCCGCAGACACTAAAAACCCAAGACTTCTTCAGTGGCTGTGCAAGGAGGAAGTAAGG  
GAACGAGATACTGACAAAGATGG  
GAAGGTGAATTTTAAAGAGTTTTTCCATGGACTATTTGACCTCGTAAGAACTATGACG  
AAGAAAGTCATCATAATTCTT  
CACATGAATCTAATAACGATTCATTGGAATCACCGGCAAAGAGATTTTTCTCCGAGCTT  
GACAAGGATGCTGACGGATTC  
TTGTCTGACGTGGAGCTACTACCTATCATCGGAAAGCTTCATCCATCAGAGCGTTATTAT  
GCTAAGCAACAGGCAGATTA  
TATTATATCACAGGCTGATACGGATAAAGATGGACGGCTATCCTTGACTGAAATGATCGA  
TAGTCCATATGTATTTTATA  
GTGCTATCTTTAACGAGGATGATGAAGAAGATTATGAATACCACGATGAGTTCCGTAA  
>CsCML22

ATGAAAACCATGACATTAAGAATGTTGTTGTTTCTTAAAGAACTACGGAATCCTAG  
TCGAATTATCCAACATGCTCT  
TCTTGCTTCCGAGACATCATTTACCATCAATGAAATAGAGGCATTATACGATCTTTTGA  
GAGATTAAGCTATGCTATCA  
TTGAAGATGGCCGATTCACAAGGAAGAGTTCCGGCTTGCTCTTTTCAGCAATAGCAC  
CATGCAGAATCTCTTTGCAGAT  
AGACTATTTGAGTCATTTGACATCAAGAAAAATGGAGTTATTGAATTCGATGAATTCGT  
TCGTTTCGCTAAGCATCTTCCA  
TCCTAATGCACCAGAATCAGATAAAATTGAATTCATGTTTAGATTATATGACTTGAGGCA  
CACTGGATTCATAGAACGTG  
AAGAGTTGAAGGAGATGGTAGTGGCTCTCCTGAGTGAAATGGATGTGAGTGTATCAGA  
TGAAGATATCGAAGCTATCCTA  
GACAAGACACTTTTGGATGCAGATCTAAACGGGGATGGAAAGATTGATTTAGAAGAGT  
GGAAGATATTCATCTCAAAGAA  
TCCATCCATTCTCAAGAACATGACTCTTCCCCTTCTTAGGGAGATCACTCAAGCCTTTC  
CAAACCTTCGTCTTGAATACTC  
AAGTCCAAAACCTAGAAGTAGAAGTATAG  
>CsCML23

ATGAGCAGTGACAAAGAACCAACCGTGAAACTCGACGACGAACAGCTAAGCGAGCTA  
CGTGAAATATTTAGATCATTCGA  
TAGAAACAACGACGGAAGCCTAACACAGCTTGAACCTCGGTTTCATTATTACGCTCACTA  
GGCCTCACACCTAGCTCAGATC  
AACTCGATACATTAATACAAAAAGCCGATACAAATAGCAATGGTTTGGTTGAATTTCT  
GAGTTTGTGGCACTCGTGGCA  
CCCGAGCTTCTTCTGCTAAATCGCCTTATACAGATGATCAGCTGAAGCAGCTGTTTAA  
GATGTTTGATAGGGACGGAAA  
TGGCTATATAACGGCTGCTGAGAGTTTTCTCGCGCCATTACTTCAGCTGCTTTTGATAAT  
TCTTTTTTCGTGATTTTGGTT  
ATTCGTTTGCATACCTTTTGTTCAGATGA  
>CsCML24

ATGGGCTGTTGTTATTCTGCCATGGGTGTTCCGGTTGTTGCCCCGTGAAGATTCTAGGAC



CCTTGCTTCTCAAACAACTTT  
TAGTGTTAGTGAAGTTGAAGCACTATTTGAGTTATTCAAGAGCATAAGCAGTTCTGTAA  
TCGACGATGGGCTAATTAGCA  
AGGAAGAATTCTTACTAGCCTTGTTCAAGAACAAAAGGAAAAAGAATCTGTTTGCAAA  
TAGGATTTTTTCTCTTTTGGAC  
GTTAAGCGTAAGGGGGTCATTGATTTTGGTGACTTTGTTAGATCACTAGGCGTGTTTCA  
CCCTAGAGCTCCGTTAGAAGA  
TAAAATTAATTTTTCGTTTAAGCTTTATGATTTGGAAGGAACAGGCTTCATTGAGCGCC  
GAGAGGTGAAACAAATGTTAA  
TTGCACTTTTACATGAGTCAGAGCTAAAACTGGCTGACGAGGCTATTGAAATGATACTG  
GACAATACATTTTCAGAGGCG  
GATGGAGACCGGGATGGAAAGATAGACAGATCAGAATGGCACGCTTTTGTACCAAGA  
ATCCTTCCTTGTTGAAGACAAT  
GACACTTCCTGTTTTAAGGGATATTACATCAGCATTCCAAGCTTTGTTTTCAATACTCA  
AGTTGATGAGATTTTCGTCTC  
CTCAAGTTGAAGAGGTTGAGATTTTCATCTTCTCAAGTTGAAGAGATTGAGATTTCTTCT  
TCTCAAGTTGAAGAGATTCCA  
AAATGA

>CsCML25

ATGGACAAAGAACAACAATACAAACGTGTATTCAGACATTTGGACGTGAATGGTGACG  
GGAAGATATCGCCACCCGAGCT  
CCAAATTTGTATTGGTAAGATAGGTGAGGACTTGTCATTGGAGGAAGCAGAAATCGCG  
GCAGAGTTAATGGACTCGGATG  
GTGACGGGTTGTTGAGCTTCGATGATTTGGTTAAAGTGGTCGAAAGTGCTAATGAAGA  
AGAGAAAGTAAAAGACTTGAAG  
TTGGCATTTAAGATGTATGAAGAAATGGAAGGCTGTGGCTGTATAACTCCTAAGAGCTT  
GAAGAGAATGCTTAGCAAATT  
AGGAGAGTCGAGAAGTGTGACGAGTGTGAGTTGATGATCAAGAAGTTCGACCTTGAT  
GGCAATGGTGTACTTGATTTTC  
AGGAGTTTCAAGACATGATGTCATGA

>CsCML26

ATGGACAAAGAACAACAATACGAACGTGTATTCAAACATTTGGACGTGAATGGTGACG  
GGAAGATATCGCCACCCGAGCT  
CCAAATTTGCATCGGTAAGATAGGTGAGGACTTGTCATTGGAGGAAGCAGAGATCGCG  
GCAGAGTTAATGGACTCGGATG  
GTGACGGGTTGTTGAGCTTCGATGATTTGGTTAAAGTGGTCGAAAGTGCTAATGAAGA  
AGAGAAAGTAAAAGACTTGAAG  
TTGGCATTTAAGATGTATGAAGAAATGGAGGGTTGTGGCTGTATAACTCCTAAGAGCTT  
GAAGAGAATGCTTAGCAAATT  
AGGAGAGTCGAGAACCGTTGACGACTGTGAGTTGATGATCAAGAAGTTCGACCTTGAT  
GGCAATGGTGTACTTGATTTTC  
AGGAGTTTCAAGATATGATGTCGTGA

>CsCML27

ATGGAGTCTAATAAAGTTCCAAAATCTTTTGGATGTTTTCTCAAAAGGGTCTCGTTTT

AAGGTTAAGTAGTTTTTCGTTT  
CAAGAGTAACAATACTTCGAACTCCACTTCTCCTACGTTAATGTCTCCTAGATCGCCGA  
AACCAAACACTAACAACAGAG  
AACAAGAGTTTAGATCAGTCTTTGCGCGTTTTGATGCTGATAATGATGGAAAGATTCA  
GCATTGGAGCTTCGGTCATAC  
TTTGGCTCCATTGGTGAGTACATGTCGCACCAAGAGGCTCAGGGCGTGATCGATGATCT  
GGACACAGATGGCGATGGCTT  
TATTGATTTTCAAGATTTTATGAGGCTAATGAAGGTGAGCAATGAAAAGGATGATGTGA  
AGGCGGCGTTTTGAGATGTTTG  
AGTACGAGAAAGGGTGTGGACAGATTAGTCCAAAGAGCTTGCAAAAGACATTAAGTC  
GACTTGGCGATTCAAAAACCTTAT  
GATGAGTGTTTGCAAATGATTAAGATGTTTGATACTCATGGCAAAGGAGCTGTTGATTT  
CAATGAGTTTCAACAGATGAT  
GACGGCTTAA

>CsCML28

ATGGCACAAACCGACGTCGAAAAAGTGTTCAAAAAATTCGACGTGAACGGCGACGGC  
AAGATCTCCATAACCGAACTCGG  
CTCAATCCTTGCCGCACTCAGCGGCGCCGTCACATCTGAAACCGAACTGAAATCGGTC  
ATGAAAGAAATCGACACTGACG  
GTGATGGATTCAATTGATTTTGACGAGTTTGTGCGGTTTCATAACGGTAACGGTGAAGAA  
GAAGAGAGTAAGGAGTTGCGT  
GAAGCGTTTGATTTGTATGATGAGGATAAGAATGGGAAGATCTCAGCGAATGAGTTGC  
ATTCGGTTATGAAGAGGTTAGG  
TGAGAAGTGTTCTGTTGAAGGATTGTAAGAAGATGATTCAGAGCGTTGATGTTGATGGT  
GATGGTTGTGTTAATTTTGAAG  
AGTTTAAGAAGATGATGAATAAGTGA

>CsCML29

ATGCCTGCGGGCTACAGCTGGGCCAAACCGCCTGCTATGACTCTTGTCCATCAAAATCT  
TTCTATGGGTTGCTTTCCAAG  
ACTTGTAACCTCCTGCATTTGAAAGTTACTCTTGCCGTTGGACTATTCGGACATCTGCATT  
ATTCGTGCCTCAGCAACGTC  
TTTTCCATGACTCAGCTAACAATATTCTGATATTGCTTGCTATATTGTCCCTTCTGAGTAG  
ATGGGGATATCTTGAAAAG  
CAAAACAAAGCACAGCCAAACATTAAGTCATGTTTTATGGAGTGCGCTCTTAAACAGG  
TAGAAGCACCCCTTGACAGATGA  
TCAAATAAAGGGTCTAGTCAGCAAGTTTGACACTAATGGAGATGGAAAGATCAGTCGG  
AGGGAAGTGAAGGTTAGGCTTGA  
AGAGTCTTGGCCTGCATTTTCGCAGGCTTAAGAGCTATGGGTGCAGTACGTCATGCTGAT  
GCTAATGGAGATGGCGTTATT  
AGCGACGAAGAGATAAACGAGCTTGCTAAATATATTTCCAAGTGGGGAATTTCTGTAAC  
TTAA

>CsCML30

ATGCGGCAGTCCTGGTGTCTTAGACAGGTAGAAGCGGCGCCCCTGACAGAAGACCAA  
ATAAAAGGTCTGCTCAGAAAATT

CGACGCAAATGGTGACGGCAAGATCAGCAGAAGGGAAC TAAGGGCTGGCTTGAAAA  
GCCTTGGTCTACGTTTCGCGTGCT  
TTAGAGCTAGACGTGCACTGCGTTATGCTGATGCTAACGGAGATGGTGTTCAGCGAT  
GAAGAAATAAACGAGCTCGCC  
AGATATGTTTCCAAGTGGGACATTTCTTAACTTAA

>CsCML31

ATGACGCGAAAGTCGTGGTGTCTTAAACAGGTAGAAATGCCCATGACGGATGACCAAA  
TAAAGGGTTTAGTCAACAAGTT  
CGACACTAATGGAGACGGAAAGATCACTCGGAGGGAACTGAGGGTAGGTTTGAGGAA  
ACTTGGCCTACGTTTCGCAACCT  
TTAGAGCTATGGGTGCAGTACGTTATGCTGATGCTAACGGAGATGGTGTATTAGCGAT  
GAAGAGATAAACGAGCTTGCT  
AAATATATTTCCAAGTGGGGAATTTCTGTAAATTAA

>CsCML32

ATGTCGCTTTCGGAACAATTCATATCATAGGTGACTTGCAATGTTTTCCACACAATTT  
TCCAATTTATGTCTACATAA  
AGCAAAGTTTATCATTGACACACCCCCAACAAAGACTTGACGGCAGCCACAGCACA  
CGAAAAGGCTCATGCAACGAACC  
TTGGAGGTGTTGAGAATGGCCCGGGTAAGAAGAAGGCGTTGGGAGTGAATCCAAAGA  
CTATGATGGAAAGATTGGGAACG  
TTTTGGGATCCTGATGACCATAGGGAGGCTCTTGATATGGACGAAATGGTGAATTTGTT  
TGTTGAGGACGAGCCAAGCTT  
AGATGAAGTGAAACAAGCGTTTGGCGTGTTTGATAAGAACAATGATGGCTACGTAGAT  
GCAAAAGAGCTACAAAATGTGC  
TTTCTAATATGGGCTTTTACATATATGTGAAAGTGATTGTAGAAGGATGATTGTTAGCTA  
TGATGCTGACAAAGACGGT  
AAGCTTAGTTTTTCGCGAATTTTGAAGGTCGTGGAAGATGGCTTTTCGGTAA

>CsCML33

ATGTCAACATTGCCCCGAGGACCAACTCAATCAACTCAAAGAAATATTCACACGTTTCG  
ACCTAGACAAAGACGGGTCCCT  
AACACATCTAGAGGTCGCAGCCCTCCTTCGGTCTCTTGGCCTCAAACCATCTGGAGAC  
CAAATTCACAACTATTTAAAA  
ACATGGATTCTGATGGCAGTGGGACCGTGGAATTCGACGAATTAGTGAATTCCATGTCTG  
TCCCATATGATGACTGAAGAG  
ATATTGGTTAATCAACAACAACCTTATGGAAATATTTGATCTTTTGATAGAGATGGAAGC  
GGGTTTATAACGCCTGCTGA  
GCTAGCGAAATCTATGACGAAATGGGACAACCTTTAACGTATCGCGAGTTGTCTGAA  
ATGGTTCGAGACGCGGATACGG  
ATGGAGATGGTGTATTAGTTTTAAGGAGTTTCAAGGGATTATGGCTAGGTCGGCAGCT  
GATCACTTGGGTTCTCATTG

TAA

>CsCML34

ATGGTTGTAGTCCATCTAGATCCAATCCTGATCCATTATAATCCCGGCAACGATGGGCGC  
GGCGGCGAGCTCGTCATCAT

CGGAAATATAGAGATTGAGCTCACTGACATTGGGGGAAAAGTTATGAAAGCAGCTAAA  
CCGGCACTGACTTTTGATGACA  
TTAGACGGCTGGCTCTTAATTCGCCATTTACGGTTAATGAAGTGGAAGCATTGCGTGAA  
TTGTTCAATAAGTTGAGCAGT  
TCGATTATAGACGATGGACTCATACACAAGGAAGAGCTCCAATTGGCGTTGCTCAATTC  
AGCCGGTGGAGAAAATCTTTT  
CTTGAACAGGGTTTTTGATCTATTTGATGAGAAGCAAAATGGCGTTATTGAATTCGAGG  
AGTTTATCCATGTATTGAGCA  
TCTTCCATCCTTATGCCCCAATAGAAGAAAAAATTGATTTTGCCTTCAGGTTATATGATT  
TGAGAAAAACCGGGTACATA  
GAACGGGAAGAAGTTAAAGAAATGATTGTTGCCACTTTAAAGGAAACCGGGATGCGT  
CTTTCAGAAGAAATACTTGAAGA  
GATAATTGATAATACATTTGCAGATGCAGATGCGGACATGGATGGAAGAATCAACAAAG  
AAGAGTGGAGGGGACTTTGTTA  
TCCAACGACCCCAACTCTTGAAGAACATGACCCTTCCATCTCTTAGGGATGTGACGAC  
AGCCTTCCCAAGTTTTATATTC  
AACACAGGAGTAGATGATTGA  
>CsCML35  
ATGGATCCAGCTGAGCTACGCCGTGTTTTCCAAATGTTTGATCGCAATGGCGATGGCAA  
GATCACAAAGCAAGAGCTTGC  
AAAATCTCTAGAAAACCTTGAATATACATCCCGGATGATGACCTAGCCCAAATGATCG  
AGAAGATTGATGTCAACAAGG  
ACGGCTTTGTGGACATGGAGGAATTTGGTGAGCTTTATCAAACAATATTGGGTGAGAG  
GGACGAGGAAGAGGATATGAGA  
GAGGCGTTCAATGTGTTTGATCAAAATAGGGACGGTTTTATCACCGTGGAAGAGCTTA  
GGTCTGTTTTGAGCTCGCTTGG  
GTAAAGGCAAGGCCGTCTATCGAGGAATGTAGGCTCATGATAAAGAAGGTGGACGAA  
GATGGTGATGGAATGGTTAACT  
ACAAAGAGTTCAAGCAAATGATGAAAGCAGGTGGTTTTGCAGGCTTGGAAACTTAA  
>CsCML36  
ATGTCAGGCTACCCTCAAAACCCCTCAGGCTACGGCACTCCACCCGCCCAACCTTACG  
GTGCCCCACCCCAACAACCTTA  
CGGTCAACCCCTCAACAATCCTACGGTCAACCCCCACCAGCCCAACCTACGGCGCA  
CCACCTGCCCAACCTTACGGTG  
CACCTGCACAGCCCTACGGTGCACCCGCACAGCCTTACGGTGCTCCCTCAGCCCCATA  
CGGCCAAAACCCCAACAAACCT  
CCTAAAGAAAACAAACCACAGGGAAGTGGTGGGTACGGTGCTGCTCCTCCACCTGGT  
GGCGCGTACGGCCAGGGAGGGGC  
GCCGTACGGGAGTCCGTTTCGCGGCGTTGTTGCCGTCGACGTTCCCGCCAGGGACTGAT  
CCGAACGTGGTGGCGTGTTTTTC  
AGGTGGCGGATCAGGATGGGAGTGGTGTGATTGATGATAAGGAGCTGCAGAGGGCTTT  
GAGTAGCTATAATCAGAGCTTT  
AGTCTCCGTACTGTTCAATTTGCTCATGTATCTTTTACCAATACTAACACCAGGAAGATC  
GGACCCAAGGAGTTCATTCA

AGTTTTCTACAGCTTGCAGAACTGGAGGGCAAACCTTTGAGAAATTTGACAGAGATCGC  
AGTGGCAAGATTGATATCAATG  
AATTGCGAGAGGCCCTCATGAGCCTTGGCTTTGCAGTTTCACCTGTGGTTTTGGATTTG  
CTAGTGTCCAAGTTTGACAAG  
AGTGGTGGAAAAACAAGGCTATTGAATATGACAACTTCATCGAGTGCTGCTTGACTG  
TTAAGGGCCTAACAGAAAAGTT  
CAAGGAGAAGGACACATCGTACTCAGGGAATGCTACCTTTACGTATGAGGCGTTCATG  
TTGACTGTTTTGCCCTTCCTCA  
TTGCTTAG

>CsCML37

ATGAAGCTCTCCGGTAGAATCAACCCAAAAAACATCTTCCGATCCAAAAGCCACAAAA  
AAGACTCCGTCTCCAGATCCGA  
ATCCTCTTCATTACGCTCATCCATTACGACGTCGTCTGGTTCACCAGAACGATCAAAAG  
GGGCCACAACACCAACAACCTG  
TCTTACCAACACAACCCTTAACAAGATCTGACTTAGAAGCTTTGCTGCGCCGTATAACC  
AATGATGAAGCTGAAGTTAAG  
TTAATGCTTGATGAAGTCGAAGGTGACGGTGAAGTTGAGGGAACGATGACGGAGTTT  
GGTGAAGAAGAGATGAGAGGCGC  
CTTTGAGTTTTTTGACAGTGATGGCGACGGAATGATAACGGCGGATGAGCTGTTTCAG  
GTTTTTAAAGTGATTAATGGTG  
ATGATGGGTGTACGTTAGAAGAGTCCACCATACATATCCAGTCATTGCTTTTCATCTTCTA  
ATCTTCTACAAATATCTATA  
TTCAGATGTATACGGGTCATTTCGACATGTGAAAGGTACTTTGAAAAGAGAAAGAGAGT  
GA

>CsCML38

ATGAAGGAAGCATTTCGAGCTATTTGATACTGATGGCAATGGTACCATTGATGCTAAGGA  
GTTGAGCAATGCAATGAGGGC  
CCTTGGTTTCGAAATGACAAAGGAGCAACTTGATCAGATGATAGCGGATGTAGACAGA  
GATGGCAGTGGTGCAATTGATT  
TTGATGAATTTGTGTACATGATGAGTGATAAAATTGGGGAAAGGAGCAACAAACAGGA  
GCTTACAAAAGCATTCAACATT  
ATTGATCATGATAAAAATGGAAAGATATCAATTTTGGACATCAAGAATATTGCTAAGGA  
GTTGAGTGACGCTTTACCGA  
TGCAGAAATTCACGCAATGGTGGAGGAAGCAGATCGTGATGATGATGGAGAAGTTAGC  
AAAGAGGAGTTCATGAGAATGA  
TGCAGACAACCTTCTTATGGATATTAG

>CsCML39

ATGAGGGCCTTGGGTTTTGAAATGACGGAAGAGCAAATCAATCAAATGATAGCAGACG  
TAGACAAAGATGGGAGCGGTGC  
AATTGATTTTGATGAATTTGCATACATGATGACTGCCAAAATTGGTGAGAGGGACAGCA  
AACAAGAGCTTACAAAAGCAT  
TCGAAATCATTGACCAAGATAAAAATGGGAAGATATCCGTTGCTGACATTAAGAAAATA  
GCTAAGGAGTTGGGTGAACAT  
TTTACCGATGATGAGATTCACGAGATGGTTCGAGGAAGCAGATCGTGACCATGATGGTG

AAGTCAGTGCAGAAGAGTTTAT  
GAGAATGATGAAGAGAACTTCATATGGATATTAA  
>CsCML40  
ATGATCTATAATTATTATAACAAATCGATTTTAGAAGATCTATCCGGTTCTTTCTTGCTTTT  
CTCAACAAGGAGTGATAT  
ATTCGAACCTCCAGTTAATGATGATCGTCCTTCACAACTCGTTCAACGCGCACTTTCT  
ATAGAGGAAAAGGAGAAGCTG  
TTATTTTATAAAGAATTCGTTGCAAAAAATGGGAGTTCGCAGAGAATCATCAAGAAGC  
GACCAGCCCAGAGGACGTCAT  
CATGGGTAAATCCGCAGAAAAAGCAAGAGATCAATGAAGCATTGACCTATTTGATAC  
TGATGGATCTGGTACCATTGA  
TGCCAAGGAGTTAAATGTTGCAATGAGGGCCTTGGGATTGAAATGACAGAGGAGCA  
AATTAATCAAATGATAGCGGATG  
TAGACAAGGATGGCAGTGGTGCAATTGATCGTGATGAATTTGAGTACATGATGACTGCC  
AAAATTGGTGAAAGGGACAGC  
AAACAAGAGCTTAAAAAAGCATTGAAATCATTGACCAAGATAAAAAATGGCAAGATAT  
CTTTTGCAGACATTAAGAAAAT  
TGCTAAGGAGTTGGGTGAACATTTTACTGATGCAGAGATCCACGAGATGGTCGAGGAA  
GCCGATTGTGATGATCGTGATG  
GTGAAGTCAGTTCAGAGGAGTTCATGAAAATGATGAAGAGAACTTCTTATGGATATTA  
G

>CsCML41  
ATGTCGAAAATGAGTTTTCTTGACATCCAATACAACATCTCTAAGCGTAAGTTCCTTAG  
GAAACCATCTAGGATGTTCTC  
TAGTAGCGAAAGACAACCTTCGGGCCTGCCTATGTTCCAACCAAATGTGAACGAGATG  
AGGCGTGTTTTTGACAAGTTTG  
ATCGTGATAAAGATGGCAAGATATCAAGAGGCGAATACAAGGCTATTCTTAGAGCACTG  
AAACAAGGAGGTACAGAAAGA  
GACATCCAAAAGATATTTGAGGTGGCGGATTTGGATGGAGATGGATTATTGATTTCAA  
GGAGTTTATGGAGGTGCAAAA  
GAAAGGTGGTGAGTTAAAGCGGTAGATGTGCAAAGTGCGTTTAAAGACGTTTGATCTC  
GATGGAGATGGGAAAATAAGCG  
TCGAGGAAGTGATGAGTTGATGAAGAGGCTTGGGGAGAGGTGTAGCTTGCAAGATTG  
TCGAAAAATGGTGAGAGGTGTG  
GATTCGAACCAAGATGGTGTGATTGATATTGATGAGTTTATGACGATGATGACACAAAA  
CATGAAGATTTAA

>CsCML42  
ATGAGCAATTCAAGTGAGAGAAAAGCTGAGCTAAAAAGTGTTTTTGCCACCTTTGACA  
AGAACAAAGATGGGTTCATCAC  
AAAACAAGAACTTAGTGATTCACTCAAGAATATAGGCATATCAACTAGTGAGAAAGAT  
GTGGTAGAAATGGTTCAAAGGG  
TTGATGTTAATGGTGATGGATTGATAGATTTTGATGAGTTTTGTGAGCTTTTTGAGTCCA  
TGATGAGTAAAGAAGACATG  
CAAGGGAGTAAAGTTGGTGATGATGATGATCATGAAGATGGTGATTAAAGAGATGCTTT

TAATGTATTTGATGGTGATAA  
AAATGGGCTTATAAGTGTTGAAGAATTAGGGTTGGTTTTGGACTCATTGGGTTTTAAGG  
AAGGGAAAAAGTTGGAAGATT  
GTAAGAAGATGATTAGCAAAGTTGATATTGATGGTGATGGTATGATCAATTTAATGAGT  
TCAAGAGCATGATGAAAAGT  
GGTGTTAGTCTTATTTCAAGTTTCTTGA

>CsCML43

ATGTCTTCTCCTCCTAGCTACAACGATCTGTATCGCCTTTTCAAGAAGCTAGACCAAAA  
TGGAGACGGTCTTGTGAGCCC  
GCATGAGCTCCAATGGCTTCTTGATACCATGAAAGTGTCTTCAAGTGTGATGACCTAA  
GATACTTAACGGGTAAAACCA  
ATATTAATTTTACTGAGTTCTTAGAGTTTTACGGTACCATTACAAAGGAAGAAAAGGTA  
ACCTGTGATGATGAATCAGAA  
AGTGACCTCTTCAAGGCGTTTGAGATGTTTGATAAGAACCGTGATGGATTCATTTGTAA  
TGAGGAGCTAATGGAGGCGTT  
AACAAGGTTGGGATTATGGGACGATAAGAGTAACATGGATGTTAAGAGTATGATCAAA  
GCCTATGATGCCAATTGTGACG  
GTTTTATTGATTTCCATGAGTTCAAGAAAATGATGGCTTAG

>CsCML44

ATGTCTCAGTGCTTAGAAGGGATCAAGCATCTATGCACTTCCCTACTTTCTGTTGTGAT  
CTTGAATTAATAACAATC  
GCAGGGGCTCGATGACCCTGCAATTCTCGCTAGCCAGACAGTTTTTAGTGTAAGTGAA  
ATAGAAGCGCTTTACGAGCTAT  
TTAAGAAGATTAGCAGTGCAGTCAATGACGATGGGTTGATTAATAAGGAAAAGTTTCA  
GTTGGCATTGTTTAAGACCAAT  
AAAAAAGAGAGCTTGTTTGCTGATCGGGTGTTGACTTATTCGACACCAAACACAATG  
GAATTTTGGGATTTGAGGAGTT  
TGCCCGTGCCTCTCGGTGTTTCATCCAAACGCCCTATTGATGATAAGATCAACTTTTC  
CTTTCAGCTTTACGATCTAA  
AGCAGCAAGGTTTCATTGAGAGGCAAGAGGTGAAGCAAATGGTGGTAGCTACACTTG  
CTGAATCGGGGATGAATCTTTCA  
GACGATGTTATAGAGAGTATCATTGACAAGACCTTTGAGGAAGCTGATACGAAGCATG  
ATGGTAAAATCGACCAAGAAGA  
ATGGAGAAACCTCGTGCTACGACATCCTTCTCTCTTGAAAAACATGACCCTGCAGTAC  
CTCAAGGACATTACGACTACAT  
TCCCAAGCTTCGTTTTTCACTCGAGAGTCGAAGATATGTAA

>CsCML45

ATGGCTGCATCCAAGACACAACCTAGAGTTTCATGATCATTTACCTTTGATAGAAGAAAA  
GCTAGGCGGAGACGGTCTCAT  
AGGTGAATTATGCAAAGGATTTGAGCTTATAATGGACCCGAATAAAGGGGTGATCACAT  
TTGATAGCTTGAAGAATAACG  
CGTCGTTTTTGGGCCTCCAAGACTTGAGTGATGATGATTTGATGAGCATGCTAAAGGAA  
GGTGATTATGATGGTGATGGC  
GCGTTAAATCAGATGGAATTTGTGTTCTTATGTTTAGATTAAAGTCCTGATTTGATGGAT

CAATCTGAGTTTTTGTGGA  
AGAAGCTCTTGAACAAGAGGTAAAGAATTCATATCAATAG  
>CsCML46  
ATGGTTCAGGAAGAGTTCCAGCTCGCACTATTCAGAAATAGAAACAAGCGTAATCTATT  
TGCGGACAGGATATTCGATCT  
ATTTGATTTGAAACGCAATGGAGTTATTGAGTGTGGAGAATTTGTTTCGATCATTAGGTG  
TTTTCCATCCGGATGCACCAA  
CAGAAGATAAAATAAAATTTGCTTTTAGGCTTTATGATCTCAGACAAACTGGTTTTATCG  
AGAGAGAGGAGTTGAACGAA  
ATGGTAATAGCACTGTTAGACGAATCTGATTTGGTACTTTCAGAAGACGTTATTGAAAT  
GATAGTCGACAAAACATTTAG  
TGATGCGGATATTAAAGGGGATGGAAAGATAGATGAAGAGGAATGGAAGCAATTCGTA  
GCACATAATCCATCTCTTATAA  
AGAACATGACACTTCCCTATTTAAAGGACATAACTTTGGCATTCCCGAGCTTTGTTGTA  
ACCTCTGAAGTAGAAGACTCG  
GAAGTATAG  
>CsCML47  
ATGGGCTGCATGTGCTCTAGTGGCATTAAAGCATACTCCTGGGTATGAAGATCCTGCTATT  
CTAGCTAACGAAACCCCGTT  
CACCGTGAGCGAAGTTGAGTCATTGTATGAGCTATTTAACAAGTTGAGCAGTTCCATTA  
TCGATGATGGCCTTATTCACA  
AGGAAGAGTTCCAGCTCGCGCTCTTCAGAAACAGAAACAAGCGTAATCTTTTCGCAG  
ACAGGATATTCGATCTATTTGAT  
GTGAAACACAATGGAGTTATTGAGCGTGGAGAATTTGTTTCGATCATTAGGTGTTTTCCA  
TCCGGATGCACCAACCGAAGA  
TAA AATTGAATTTGCTTTTAGGCTTTATGATCTCAGACAAACTGGTTTTATCGAGAGAG  
AGGAGTTGAATGAGATGGTAA  
TAGCATTGTTAGACGAATCAGATTTGGTACTTTCGGAAGACGTTATAGAGATGATAGTC  
GACAAAACATTTAGTGATGCG  
GATATTAAAGGGGATGGAAAGATAGATGAAGAGGAATGGAAGCAATTCGTAGCGCATA  
ATCCATCTCTTATAAAGAACAT  
GACCCTTCCCTATTTAAAGGACATAAGTTTGGCATTCCCGAGCTTTGTTCTAACCTCTG  
AGTGTGAAGTAGAAGACTCAG  
AAGTATAG  
>CsCML48  
ATGGAGCTTACGTCCGTAGCAACTGCAGCCACAACAGGAGGTATACTGTCCATGGAGG  
TCAAATATTTTATAATCTTATA  
CATGTTTGTAGAGTGGGTGAAACTTTTACATGATTGTTATTTTCCTTTTGGCACGACCCAT  
GTGGCGGTTTATCTCTACTA  
CAGAAAACACTACTTGTAGACCAACTCCAAGCACAGTTGCTCAAGCCCACGACACTAT  
ACAGGTTTTCCATGCATATAAT  
AGCAGGAAGAAGTCATTAGGAGTAGATCTTGAAATAGTTTTGAAAAGATTAGGAATGT  
TTTGTGATCATGATGACAAGGG  
ACAAATTATTGGCTCTGATGAGATATTGGGTTTGTGTTGACGAGGACGAGCCAAGCTTGG



ATGAAGTGAAAGAAGCATTTA  
GTGCGTTTGACAGAAACAAAGACGGGTTTCATAGACGCAAAGGAGTTGCAACACGCGC  
TTTCAGAGATGGGGTGTATACAA  
ATATCAGAAAGCAATTGTAGACTGATGATTGGAGGATATGATGTCGATCAAGATGATAA  
GATTAGTTTTAGAGAGTTTTT  
GAAGCTCATGGAAGACTGTTTTTGA

>CsCML49

ATGGGTTGTATAAGTTCAACTCCGAAGGAATTCAAAAAGTTACCAGCTTATGATCCGGT  
TGCGCTTGCTGCTGAGACCCC  
TTTTACTGTGAATGAGGTGGAGGCTTTATACGAGCTGTTTGAGAACTAAGCAGTTCCG  
TGGTGGATGATGGGCTTATAG  
GGAAGGACGAGTTTAACCTAGCGCTATTTCGAAATCATAGTAAACGAAACCTGTTTGC  
CGATCGGATATTTGATCTTTTT  
GACGTAAATAGGAGTGGGCATATTGACTTTAACGAGTTTGTCCGTTTCGTTGAGTGTATT  
TCATCCAAAAGCTCCTCAAGC  
CGACAAAGTTTTGTATGCGTTCAGACTTTATGATTAAAGACGCACTGGCTTCATCGAAC  
GTGAGGAGTTGAAGGATATGG  
TTAAGGCTCTTCTGAGTGAATCTGATCTTGTTCTATCAGATGAAATAATTGAATCGATGG  
TAGACAAGACTTTCGCAGAA  
GCAGATTATAAAGGTGATGGTAAGATTGACCAAGAAGAATGGAGGGAGTATGTCGACA  
AGAACCCGTCCTACTATTGAAGAA  
CATGACTCTTCCTCACTTAATGGACATAACTTTGAGGTTTCCAAGCTTTGTGATGAACA  
GCCAGGTAGAAGAGACTCAGT  
CAACAGACTAG

>CsCML50

ATGCTTATAACCCATCAGGTTACAACTATGGTGCACCACCACCTTCTCAACCATACTAC  
TCCACCCCTTACGCCGCACC  
GTCACCTTACGGTCAGCCACAACAGCCCGCTTTCACGAGCCCTACGGTTATGGAACA  
TCCACATTTCCACCGGGGACGG  
ATCCTAATGTGATTGCGTGTTTTCAAGTGGCTGACATAGACCGAAGTGGTGTGCGTTGAT  
GATAAGGAGTTGCAAATAGCG  
TTGTCGTCGTATAATCAAAGTTTTAGTATCCGTAAGTGTTCGTCCTACTTATGCATCATTTTA  
CAAATACCAACACTAGAAA  
GATTGGACCAAGGAATTTACTCAAGTGTTTTATAGTCTACAAAATTGGAGAGCAATTT  
TTGAGAAATTTGATCGAGATC  
GAAGTGGTCATATCGACACCTGGGAACTGAGAGAGGCACTCATGAGCCTCGGATTTAC  
TGTTTCACCCGTTGTCTTGGAT  
TTACTCGTCTCCAAGTTTGACAAGACTGGTGGATATAAGAAGGCCATTGAGTACGACA  
ATTCATCGAGTGTTGCCTCAT  
TGTTAAGGGGTTAACCAGAAAGTTCAAGGAGAAAGACACAATGTATTCAGGCAATGC  
GACATTCACATACGAGGCTTTTA  
TGTTAACAGTTCTTCCGTTTCTCATTGTTTAA

>CsCML51

ATGGGAAACACATCATCAATGCTGACACAATACGACATCGAAGAAGTACAAGAACATT

GTAACAACACATTTTCACAACA  
AGAGATAGTGTCAATTGTACCAAAGGTTTTGTCAGTTGGATCGAAATAGTGGTGGATTTA  
TCTCTGCTGATGAGTTTCTTT  
CGGTCCCCGAATTCGCTGTTAATCCCTTGTCTCAGAGGTTGTTTCAGGATGATTGATGGG  
TTGAATTTCAAGGAGTTTGTG  
GCATTTTTGTCTGCATTTAGTTTCGCGTGCCACCTTACAGCATAAAGTGGAATTTATATTT  
AAGGTGTATGATTCCGATGG  
CAATGGGAAGGTTGCATTCTCTGATCTGTTAGACGTTTTGCGGGACTTGACAGGGCAA  
TTCATTTCTGAACAACAAAGAG  
AGCTTGTCTGACGCAAGTTCTGGAAGAAGCTGGGTACAAGAAAGATTTCGCTATTAGT  
TTTGTCCGACTTCATGAAGATT  
CTTGGAACACAGGCTTGAAGATGGAGGTTGAGGTTCCCACAAACCCTTCCAAATATG  
TTGGAATAATTTCAATTCTAAA  
TGATGTCAATTGGAACCTTAAAAATTACAAACCCTACTCATCTTTATCACAAACACCTC  
TCTTCAACTACTACTTGACAA  
CACAGTTAACTGACAGGAAATGGCTCGACTTAGTTTAA

>CsCML52

ATGTCGTGCTTAGAGGGGATCAGGCATTTACTTGCTCCCCTGCTCCGTTGCTTTAATCTT  
GAATCATTACAAAAACAAA  
CCCCCTTGAAGATCCTGAAGTTCTAGCCCGAGAGACTGTTTTTAGTGTAAGCGAAATA  
GAAGCACTCTATGAGTTGTTTA  
AGAAAATTAGCAGTGCTGTGACTGATGACGGGCTAATTAGTAAGGAAGAGTTCCAGTT  
AGCCTTATTTAAGACAAATAAA  
AAGGAGAGCCTTTTTGCTGATCGAGTGTTTCGATCTGTTTGATACCAAGCATAATGGAAT  
CTTAGGTTTCGAAGAGTTTGC  
TCGTGCACTCTCTGTATTTTCATCCAAATGCCCTGTTGATGAAAAGATCGAGTTTTCTT  
TCAACTTTATGATCTTAAGA  
AACAAGGTTTCATAGAGAGGCAAGAGGTGAAGCAAATGGTGGTGGCGACTCTTGCTG  
AATCCAAAATGAACTTACTGAT  
GATGTTATTGAGAATATCATTAATACGACATTTTCAGGAAGCTGATACGAAACATGATGG  
GAAGATTGACATGGAAGAATG  
GAGAAGCCTTGCTCTACGACATCCGTCCCTTTTGAAGAATATGACCCTTCATTACCTTA  
AGGACATCACAAACATTTTC  
CGAGCTTTGTTTTTCACTCAAGAGTTGAGGATTCGTAA

>CsCML53

ATGGGTGGTAAGTTGACCAAGGCTGATGAATCACCTAAGACTTCGGTACCTACAACCA  
AGCTTGAAGCTAAAATCTTGGA  
GACAATCCGTGCGAGAGAATCTAAAGGAACTTCCATGAAATCGTTCAATACTATAATCC  
TGAAGTTCCCAAAAATTGACG  
CAAGCCTAAGAAAGTGCAAAGCTATATTTGAGCAATTTGATGAAGATAAAAGTGGTAC  
AATTGATCCGAAAGAGCTGAAT  
CATTGTTTTCGTAAGCTGGAAATAGATTTTACAGATGAAGAAATCAGTGATTTATTTAAA  
GAATGTGATATAAACCATGA  
CATGGGAATAAACTTCAAAGAGTTCATTGTGCTCCTGTGCCTCGTTTATCTTCTGAAGA

ATGACCCTGTTTCCCCCATT  
CTAGTTCACGCATGGGGATGCCGGAAGCTTTTGAACTTTGGTGGACTCATTT  
GTGTTCTTGGACAAGAACAAA  
GATGGTTATGTTAGTCGAAGCGAGATGGTTGATGCCATAAATGAACTACAAGTGGCGA  
GCGGTCTTCTGGGCGCATAGC  
TATGAGAAGATTCTGAAGAGATGGATTGGGATAAAAAATGGAATGGTGAAGTTCAAGGAG  
TTCATCTTTGCCTTCGAGAAAT  
GGATTGGAATCGAGGATGGCGAGGAGGATGAAGAAGAGGTAGCAGACGAGCAAGAAT  
GA

>CsCML54

ATGGCATCAACCAATAATATGCAATCTGAGTTCCAAGATTACTTGCCATTAATGGCTGAT  
AAGTTGGGTGGTGATGGTTT  
AATACAAGAACTATGTAATGGGTTTCAGTTACTTATGGATCAAGATAAAGGGGTGATTA  
CTTTTGATAGTTTGAAGAAGA  
ATTCATCAGTTTTGGGGCTTGAAGGATTGAGTGATGATGAAGTCATGAGTATGCTGAAA  
GAAGGTGATTTTGATGGTGAT  
GGTGCTTTGAATCAAATGGAGTTTTGTGTTCTTATGTTTAGATTAAGTCCGAATTTGATG  
GATCAATCTGAATACTTGTT  
GGAAGAAGCTTTGGAACAAGAGTTAAATAATTTCAATACTGA

>CsCML55

ATGACAACCAATTATAATTCTAGTTTTTCATGATTTCTTGCCGTTAATGGCGGATAAGTTG  
GGTGGTGATGGTTTGGTAGA  
TGAATATGCAAAGGGTTCGAGTTGCTGATGGATCAAGATAAAGGGGTGATTACTTTTG  
ATAGTTTGAAGAAGAATTCAT  
CAGTTTTGGGGCTTGAAGGATTGAGTGATGATGAAGTTATGAGTATGTTGAAAGAAGG  
TGATTTTGATGGTGATGGTGCT  
TTGAATCAAATGGAGTTTTGTGTTCTTATGTTTAGATTAAGTCCAAATTTAATGGATCAA  
TCTGAATACTTGTTGGAAGC  
AGCTCTTGAACAAGAATTTAATTATTTGTGA

>CsCML56

ATGAAAGCCGCTATTACCGGTCTGTTTAACACTCAAGAGGTAGCTCAAGAGTATGTCGT  
GACTGGAGTTGGTTTGCTAGC  
CGGATCAACGATATTCCTTCTCACTTTATTATGGGGAAGTTGTATCATTATTGGAAGCCA  
AAAGTTTTCTTCAGAATCGG  
GTGCCAGTACTTCCGTGGATCCTACCCAATGCCCAAACAAGAAATCTTCTCATTCTT  
ACTAGTTCTGGTGTAAGTACA  
GACCCCGAGACATGTACAGCGGCGCAAATCATGCTTCTGTCAGTTATACCGTTTCTGTT  
TCTGTTGATCCCGAAGTTGTT  
TGGCATGACGTATGCACCTCATGGATACATTTTTTTAATAGCACTTCCTGTTTCAGTTAC  
CTTCTTGCTGGTATACTTCA  
TTTATCAGGTGTTTGAGCCTTCAATTCAAAAGAGACGATTGTCATACGTCAAACACGAG  
CATTTAGTTTTAGACATACTA  
AAACATTTACAGGAGCAAATCCCAGAAAATATACTCGCTGAAGATGGTTTCAGTCAACC  
TGCCTGCTATAAAAAGTTTGTT

TAAGAAGATTGATCAAGATGGAGATGACATCATATCTTTTCTGAGCTCAAAGAACTTC  
TCGAAAGTATTAAGTTCAGGC  
AATTA AAAATCGGACAAACAGAAAACATTTCGATCAACTGATAAAAGAATTTGATTCTGAT  
GGTAACGCACAAGTATCGCTA  
GATGAATTCATCCATCGGTTACAGAATGGCTTGATGAGGCTAAAAATGAATTATCTGA  
GGTCGTCAAACCATTGGTTCA  
AACCAAAAAGGAATGAAGATGACATGACGCAAGTCCTCGTATCTGAAATTATCGGCAAT  
GCTAAAAGCTCTCCACTAGGGA  
AGTTTTACAAAGAAGATGGAACACCGGACATATCTGCCATAAAAAAATTGTTTAGGAG  
CTTGATGTCAACAAAGATGGT  
TCTGTGTCGTAAACCGAGTTGAAAAAACTTACAATGCATGTCAACTTGGGTGAGACAT  
CATGGAATGTGGATGAAACAAC  
ATCTCGCATAATGCAAAATCTTGATACAAATGGAGATAAAGAGATCGATGAACAGGAAT  
TCGTTGATGGATTTGAAAAGA  
AATTGGTGAACATAACTAATGACCGATCCAAGACATCTGGGCCTAAAGATGTATCACGG  
AAAGCATGCAAAAAAATGGAAA  
GGTGATAATGTGGATAGATCTGTGTGGGGATGGACAAAGGCTATAATGCTACTGGTGCT  
CGGGATAGCAATGTTGGCTCT  
GATGGCTGAACCTCTTATACACAGTGTTCAAAATGTCTCCAACCTCGGCTGCCATGCCGT  
CCTTTTTCATATCGTTTATCT  
TGTTCCATTAGCCACAAATGCTAGAGCAGCTATCTCTGCAATCCGAACCTGCAAGTCAA  
GGGAAAGAACGAACTACTTCA  
TTAACATTTTCTGAGCAAGAAAGGATCAATTGTTTTGATCAAAGCAAAGCATGG  
TAGAAGATGACAAGCATGATAA  
CGCATCAAGCAGTGCATCAATTTCGAGAAGGGAATGTTTCACTTCAATGTCCAAAACCTG  
ACAGATACTAATTATACAACTT  
GGGCACTGATGATGAAAACAATATTAAAGGCGTATGGACTTTGGAAAGTGATTGATGG  
CATGAAAGAACTAGCGGCTAG  
>CsCML57  
ATGGGTACATCTCACACAAGCCCTTCATTCAAGTCGTTATCCAACAAAGTCGGAGTTAT  
GCTATGTTGTTGCAATTCACA  
AAACCGATACGAGAGATTAGACAATAAGCTCGAAAGAAAAATGATGGAGGTCAAACA  
GAACAGCATACAAGGTCAAACCA  
GTTTCAGATCTATCGATAGCATTATCTTAAGGTTCCCGCGGTTCAAAGAAGGATTAAAG  
GAGATTCAAGGTGTTTTTGAA  
CTATACGATGAAGATTCAAATGGAACCATTGATAACGAGGAGCTAAAGAGATGCTTACA  
GAAGCTGGAATTCATTGTAC  
CGAGCAGGAGATTAGAGATCTTTTCGAGTCTTGATGTGGATGGGAGCAATGGGATA  
CAGTTTAACGAGTTTATTGTTC  
TTCTGTGTCTCATTATCTCTTAGACGGTCCTTCCTCATCATCTCATGTGACATCGACAG  
TGGGGTCACCCGAGCTCAA  
GCAACATTTGATACCATCATCGAAGCTTTCTTGTTTCTTGATAAAAACGGTGATGGAAA  
GCTGAACAAAAAGGACATGAT  
GAAGGCAATGAATGAAGACTTCCCAATGGAGAAATCACCTACACATATCACCAAGACC

CGATTCAAAGAAATGGATTGGA  
ACAAGGATGGTAAGGTGAGCTTCAGGGAGTTCTTGTTCTCTTTAATTAAGTGGGTCGG  
GTTAGAATCCACTGATGAAGTA  
CCTGAAACGGTGTTTTGA  
>CsCML58  
ATGTCATACTCCGGTTACAATCCAAACACCACCATTCCATCAGCCCCACCCGCACCACC  
CTCCCAATCCCACCAACCCGC  
AACCGCATACCCTTACCAACAACCACCACCTCAAAATTACAACAACCAACAAACCTAC  
AACCCCTCCGGGTATGGAGGCG  
GCTACGGGTCCCAATACGGGTGCTACCCGCCTCAACAAACGGTGTCGTTTCCACCAGG  
GACGCACCCCGAAGTGATTCTGA  
AGCTTCCAGGCTGTTGATTTGGATAGGAGTGGGTTTATTGATGCTAAGGAGCTTCAACA  
GGCTTTGACTCAGGCGTATCT  
CAAGTTTAGTTCCAGGACTATTAAGCTGCTCATGTTTCAGTTTAGGAACCCCACTGATC  
CCACACGAACCGGTCCTAAAG  
AGTTTGCTGAGTTATGGAGTTGTCTTGCCAATGGCGGGCGATCTTTGAGAGGTTTGA  
CAGGGATCGAAGTGGAAGATT  
GATCTAGCGGAACATAAGAGATGCCTTATACAGTCTTGGATATGCAATTCCACCTTCTGTC  
CTACAACCTTTGATTTCAAA  
ATACGACGACCAAAGTGGAAGGAGGGTAGATCTGTCCTTTGACAGCTTTGTTGAGTGC  
GGAATGATTATAAAGGGTTTGA  
CGGAGAAGTTCAAGGAGAAAGATACTAGGTACACGGGTTACGCCACGCTTTCATACGA  
GACATTTATGACCATGGTCATC  
CCATTTCTTGTAGCAGAATAA  
>CsCML59  
ATGGCCTTCGGTTCTCAGTCGAATGTTCTCGATCCTCCTCCAAAGTTTGATATGTACAA  
ATATACTTTTGTCTGACTGA  
CGCTGACCTGGAGGGTGTTGTGCTGGGTATGGCCACCCTTGGATAAGTGAAGATGGT  
GTTGCTCCAGACAAGCCTCTTG  
ATTCTGCAGTCTTGAGCCGCTTAACCTCAGTTTTCTGCCATGAACAAGCTCAAAAGAAT  
GGCTCTTAGGGTCATCGTGCA  
AAACTCTCAGAAGAAGAACTGCAGGCTTAAACAAATGTTCAAGATGATAGACACA  
GACAAGAGTGTTTATATTACATT  
TGAAGAACTAAAGGCTGGACTCAAGCGATTTCGGTTCTACTCTTAATGAGTCTGAGATT  
ATGATCTAATGCAATCTGCGG  
ATATTGATAATGGTACTATCGACTATGAAGAATTTGTAGCATCAACGTTACATATGAACA  
AAGTTGATAGAGACGATCAT  
TTGTTTGCTGCTTTTTTCATATTTTGACAAAGATGATAGTGGTTATATAACTCTTGATGAAC  
TCCAACAAGCGTGCAAAGA  
GTTTGGATTAGATGATGTTTATTAGTAAGAAATTATCAAAGAAGCTGACCAAAACAATG  
TACGTTTTTCACTACCATAA  
>CsCML60  
ATGGCGGAACAACCTGACTGAAGAACAATTGCTGAGTTCAAGGAAGCTTTCAGCCTC  
TTTGACAAAGACGGTGATGGCTG

TATCACCACCAAAGAGTTGGGGACAGTTATGAGATCATTGGGTCAGAATCCTACTGAA  
GCTGAACTGCAAGATATGATCA  
ATGAAGTTGATGCTGATCAGAATGGAACAATCGATTTCCCTGAGTTTCTGAACCTGATG  
GCCAGGAAAATGAAGGACACT  
GATTTCGGAGGAGGAACTCAAGGAAGCTTTCAAGGTCTTTGATAAGGATCAGAATGGAT  
ACATTTCTGCTGCTGAACTTCG  
CCATGTGATGACAAACCTCGGGGAGAAGTTAACTGATGAAGAAGTGGATGAAATGATC  
CGTGAAGCTGATATGGATGGTG  
ATGGTCAAGTGAATTACGAGGAGTTTGTGAGGATGATGCTTGCCAAGTGA

>CsCaM3

ATGAGGTCTCTAGGACAAAACCCAACCGAGGCTGAACTTCAAGATATGATCAACGAAG  
TCGATGCTGATGGCAATGGTAC  
TATTGATTTCCCTGAGTTTCTCAACTTGATGGCCCGCAAGATGAAGGACACTGATTCTG  
AGGAAGAGCTCAAGGAGGCTT  
TCCGGGTTTTTGACAAGGACCAAAATGGTTTCATCTCTGCGGCTGAGCTTCGTCACGT  
CATAACTAATCTTGGTGAGAAG  
TTGACAGATGAGGAAGTCGATGAGATGATCCGTGAAGCTTGA

>CsCML61

ATGAGTAAATCGAACGATTACAAGCGTGTATTTGATCACTTTGATGAAGACAGCAATGG  
CATGGTCTCACCATCCGAGCT  
ACACCGCCGTGTAGGCATGATTTGTACGAGCAAGTTTTAATAGAAGATGTACAAGTTA  
TAGTCGAGTCATTGCATGGGA  
GCAAAGTTGACGGGCATGAACTAGGATTTGACGATTTTCGTTAGTTTAATGGAGAGCGA  
TAATGAAGATGAGAAGGTTGAG  
GATTTAAGGAAGGCTTTTAGATTGTATGAAAACGATGGAAACGATTGTATAACACCGAA  
AAGCTTGAATCGGATGTTGGA  
TCGATTAGGTGAGTCGAGAAGTGTTGATGAGTGTGTTGGTATGATTAATCAGTTTGATC  
TGAATGGTGATGGTGTGCTTA  
ACTTTGAAGAGTTTAAAGCAATGATGCTTTGA

>CsCML62

ATGAATAGTTGTGAAGTTTTGGTAAATCCCTTCAAGCTTCGGTTCAATCGCTATTGAC  
CCATGTTTCAATAACATGGAA  
CAAGTTAGGATCCATTTCCACATCACTTGACCTAAATGAGACCGTAAAGAAAGAGTTC  
ATGACCCTTGGAGAGATAAACG  
TGATCATGGGGCAACTAGGGCTCCAACAACGTTGTAGTGATCAGGATAGCAATATTGAC  
ATTTTATCGGTGTTTGATGAT  
GAGGAACCAACTTTGGAAGAAGTTAAGGTGGCTTTTGACGTGTTTGATGAGAACTCG  
GACGGTTTCATAGATGAGAATGA  
GTTGCGTGACATGTTATGCAAGTTAGGAAAACAAGAAAACGCAATGTTAAAGGAATGC  
CGGAGTATGATAAAAGGATTTG  
ATGTCAATGGGGATGGGCTCATTGACTTTGATGAATTTGTTAGGCTCATGGAGACATGT  
TCTTTTAA

>CsCML63

ATGGGTTTAAAGAATCTATTCAACCGTAAAACCAAGAACACGACCAAAGACAATACTA

CTATGGTCGAAGAAACAATCGC  
CACAAACACAACGTTGCCCGTTGTACCTCGTCAACAAACCAAGGAACAACAACCTAGA  
GCAAGTTTTCAAGAAACTCGACG  
TGAACAACGATGGAAAAATCTCTTACTCCGAGCTAGGATCAGTGATGGGGAGCCTAGC  
AGGAAACCAACCAACGGACGAC  
GAGTTAAAGAAAATGATCATGGAAGTTGATAAAGACGGGGACGGGTTCATAGACTTGG  
AAGAGTTTATTGAGTTGAACAC  
AAAAGTCGATTCTAGTGAGTTGTTGGAGCTTATAGAAAAAGCGTTTTCCATGTTTGATG  
TTGATAAAAACGGCTTGATTA  
CGGTTGAAGAGTTGTTGAGGGTTATGCGGAGCTTGCATGAAGATTATAGTATTGAAGAG  
TGCAAGAAGATGATTGCTGGA  
GTTGATCAAGATGGTGATGGTATGATTAATTTGAATGAGTTTAAGGTTATGATGATGAGT  
GGAGTAAGGTCAGATGTTAG  
TGAATCTTGA

>CsCML64

ATGAATACAGGCGAACCATCAACTTCATCTTCTCCGGTCAAATTCTTCCGACCCCCAC  
CACCATATCACCTCCGTCATC  
GTCTCCATTACCAACTCCGTGCACCGACGACATCCATCAACTCTTCAACTACTTCGATG  
AAAATGGCGACGGTAAAATAA  
CCGCAACGGAGCTTCAAACCGGTTAAAAACCGTCGCCGGAGATGAAGTTCAGTTATC  
CGACGAGGAGGCGGAGATGGCG  
GTGAGGTCATCGGATGCTGACGGTGACGGTGTGTTAGGGTTTGATGATTTACGAAGA  
TGATGAAGGAAGGGGCGGAGGA  
GGAGTTGCGAGAGGCGTTTTCGGATGTATTACGCGAAATCGGGGACTGTTATTACGGCC  
AACAGTTTGAGAAGGATGTTGC  
GGCGGTTGGGCCAAAGTACGGTTACGGTGGAGGAGTGTAAGGGGATGATTGGGAGAT  
TTGATGTTAATGGTGACGCCGTG  
TTGGATTACGATGAGTTTCGAGCTATGATGAGTTAG

>CsCML65

ATGGAAACACAAACACCTACATCTAAACACGCTCCTCTTCTTAAATCATGTTCCAACGG  
TTCGTTTTCGTCTGCGTTCACC  
CAGTTTAAACTCCTTACGTCTTCGTGCAATCTTTGATCTATTGACTCTAATCACGACTC  
ATTTATCACTATAGAAGAAA  
TCACACGTGCCTTGACCCTTCTAGGCCTCGACACCAATGCCTCGGATTTGGACACTATG  
ATCAAATCATACGTGCATCCA  
GGCAACGTTGGGCTAACCTATGAGGACTTTGTGACATTACATAGGTCCATAAATGACTT  
GTTTTTCGGTATGGACGAGGT  
AGAGGAAGCTGTGGGAAGTAAAGAGGACCAAGAGGAGGCGGACTTAAACGAGGCGT  
TTAAGGTTTTTGATGAGAACGGGG  
ACGGGTTTATATCGGCTGCAGAGTTGCAAAATGGTGCTTGGAAGCTCGGCTTTACTGA  
AGCTATTGAGATGGGGAGAGTT  
AAGATGATGATCTCGTCTGTTGATCTTAACCATGACGGATGCGTTGACTTTTCTGAGTTT  
AAAGACATGATGCGGGTGCT  
CCAATAG

>CsCML66

ATGTGTGATGACTCAGGCGTGCCACATAGATTCGTGCTTGATATACAAGTTTTGCAAGA  
GATCTCATTGCTAGATTCTGT  
TGCTGAAACGGCAGTTGAGATGATGAACATCCTAAAGAAAATAAAGAAAAATGTCAA  
AACCGCATCAAAGCCTATTTCAA  
ATAAAATAAAACATGATCCAGAAAAGAAACCAAAAAGTATAGTTGATGTTGGTTGTGG  
AATAGGTGGTAGCTCAAGGTTT  
CTAGCTAAAAAGTACGGAGCTAAATGTCGTGGAATTACTCTCAACCCTGTACAAGCTG  
AGCGGGCTCAGGTACTAGCTGA  
TGCTCAAGGATTGGGCGATAAGCCACTATCTGAAGTACCTCATCAAGGCATACCTCGGG  
TAAGTATCTTGGTTTTTGGATT  
CTTTTCAAGCTCAACTCGATGCATTAATACAAAAAGGCGATACAAATAGCAATGGTTTG  
GTTGATTTTTCTGAGTTTGTA  
GCACTCGTGGCACCCGAGCTTCTTTCTGCTAAATTGCCTTATACAGATGATCAACTGAA  
ACAGCTGTTTAAGATGTTTGA  
TAGGGACGGAAATGGTTATATAATGGCTGCTGAGTTGGCTCATTCTATGGCGAACTAG  
GACATCCTTTGACGGCTGAGG  
AACTTACTGGGATGATCAAGGAAGCTGATACGGATGGGGATGGACGGATTAACTTTCA  
GGAGTTTTCTTGCGCGATTACT  
TCAGCTGCTTTTGATAATTCTTTTTTCATGA

>CsCML67

ATGTGTCCAACAGGAACATCCTTATTTCCATCAAGAAACATAACCAACCTACGTTCCGC  
ATTCGACATCCTAGACGTGGA  
CCATGATGGCAAAATCAGCCATGAAGATCTCAAAACATCTTACTCCCATGCAGACGAC  
AACATCATAGGTACGATGATGA  
AAGTAGCTGACTCAAACAACAATGGGTACGTAGAATACGATGAGTTTGAGAAGGTGGT  
GTTGAAAACATGATGGTAGTAAT  
GTTTATGGTGTTATGGAGGATGTGTTTAAGGCTATGGATTGTGATGGTGATGGAAAAGT  
TGGATATGGAGATTTAAGAAG  
CTATTTGAATATGGCTGGTTTAGATGTTAATGATGATGAGATTAAGGCCATGATAAGATT  
TGGTGGTGGTGGTGATTATG  
ATGATGGTGTTACTTTTGATGGATTATCAAGATATTGTCTCTTTGA

>CsCML68

ATGGCGAGAGTACTGGCCGTCCAACAACGTAAACAACACTACTTGAAATTTTAAACAGT  
TTGACATGGACTCAGATGGATC  
CTTAACATATCTTGAGCTAGCAGCCCTCCTTCGCTCTATAGGCCTTAATCTCTCGGGTGA  
CCAAATCTATACGCTCTTTA  
ATAAAATAGATTCTGATGGAAATGGGAAGGTTACATTTGAAGCATTTGTTGATGCAATG  
ACGATTGATGTGAAGACAGAA  
GAGATTGTTATTGATCAGAGACAACTTTTTGAAGCTTTTCGCTCATTTGATAGAGAGGG  
AAATGGATTCATCACACCCAC  
ACAAC TAGCTATATCAATGGCTAAGATGGGTATCCATTGACATACCATGAGCTTGTAGC  
TTTCATAGAGGGTCTTTTTG  
TAGGACTCACTAGGACGTTGGAAAGATTGGTATCGGAGCTCGCTGATTTCTGTATAGAA



CTGTGTAGGACGTTAGAAGTT  
AAAGTGGGGATGCAGAGATTGACATCCCACCCACGTATGTAGTATTTTGA  
>CsCML69  
ATGTCATCAAATAACGAAGCCAACTTTCATGATTTCTTACCCATAATGGCGGATAAACTA  
GGTGGTGAACGACTAATGGA  
TGAGTTATGTAACGGGTTCCGAATGCTAATGGACCCTATCAAACGTGTTGTCACGTTTG  
ATAGCTTAAAGAAAACTCGG  
CCGTATTGGGTATTGGAGACTTGACTAATGATGATGTGTTGAGTATGTTGAAAGAAGGC  
GATTTAGACGGTGATGGTGTT  
TTGAATCAGATGGAGTTTTGTGTTCTTATGTTTAGATTAAGTCCTGATTTGATGAAACAA  
TCTTGGTTTTTGTAGAAGA  
AGCTTTAAGAACAATAGTTGAATTTGAATCTAATTAA  
>CsCML70  
ATGCTTACACTTGACCCGAAGAAGCGCATAACCTCTGCTCAAGTCCTTGAGCATCCATG  
GATTAGAGAAGACGGAGAAGC  
ATCAGACAAACCAATCGACAGTGCGGTTCTTTCAAGGATGAAGCAATTTAGAGCTATG  
ACTAACTCAAAAACTTGCAC  
TCAAGGTGATTGCTCAAAATCTAACAACAGAGGAAATTCAAGGGTTAAAATCGATGTT  
CATGAACATGGACACAGACAAA  
AGTGGCACAATCACCATCGAAGAACTTAAACCGGGTTGGCTAGACTCGGGTCAAAG  
CTCACAGAATCTGAAGTTAGACA  
GCTCATGGACGCCGCTGATGTTGATGGAAATGGGTTCGATTGATTACATTGAGTTCATTA  
CGGCAAGAATGCATCGACACA  
AACTTGAACGTGAAGAAGATTTGTACAAAGCGTTTCAGCATTTTGATACAGATGGTAG  
CGGGTTTATTACAAGAGACGAA  
CTAGAAAATGCAATGAAAGAAAATGGATTGGGCGATGAAGCTACCATAAAAGATATCA  
TATCAGAAGTTGACACCGATAA  
CGACGGGAAGATAAACTATGAAGAGTTTTGTACAATGATGAGAAGTGGAACCCAAGG  
AGCAAAGCTGTTTTAA  
>CsCML71  
ATGCTTACACTTGACCCGAAGAAGCGTATAACCTCTGCTCAAGTCCTTGAGCATCCATG  
GATTAGAGAAGACGGAGAAGC  
ATCAGACAAACCAATCGACAGTGCGGTTCTTTCAAGGATGAAGCAATTTAGAGCTATG  
AATAAACTCAAAAACTTGCAC  
TCAAGGTGATTGCTGAAAATCTAACAACAGAGGAAATTCAAGGGTTAAAATCGATGTT  
CATGAACATGGACACAGACAAA  
AGTGGCACAATCACCTACGAAGAACTTAAACCGGGTTGGCTAGACTCGGGTCAAAG  
CTCACAGAAGCTGAAGTTAGACA  
ACTCATGGACGCCGCTGATGTTGATGGAAATGGGTTCGATTGATTACATTGAGTTCATCA  
CAGCAACAATGCATCGACACA  
AACTTGAACGTGAAGAAGATTTGTACAAAGCTTTTCAGCATTTTGATACAGATGGTAGC  
GGGTTTATTACAAGAGACGAA  
CTAGAAAATGCAATGAAAGAAAATGGATTGGGCGATGAAGCTACCATAAAAGATATCA  
TATCAGAAGTTGACACCGATAA

TGACGGGAAGATAAACTATGAAGAGTTTTGTACAATGATGAGAAGTGGAACCCAAGG  
AGCAAAGCTGTTTTAA

>CsCML72

ATGACTCAGTGCTTAGAGGGGATCAGGCATTTACTTGCTTCCATATTGCGCTGCTGTGA  
TCTTGAATTGTACAAACAATC  
AAGAGGCCTCGACGATCCTGAAATTTAGCTAGAGAGACAGTGTTTAGTGTAAGTGAA  
ATTGAGGCACCTTTATGAGTTAT  
TTAAGAAGATTAGCAGTGCAGTTATTGATGATGGTTTAATAAATAAGGAAGAGTTCCAG  
TTGGCGTTGTTTAAGACTAAT  
AAAAAAGAAAGTTTTGTTTGCTGATCGGGTGTTTGACCTATTTGACACAAAGCATAATG  
GAATCCTGGGATTTGAGGAGTT  
TGCTCGTGCACTATCAGTATTTTCATCCTAATGCTCCTATTGATGATAAGATTGAATTTTCC  
TTTCAATTATATGATCTTA  
AGCAACAAGGTTTCATAGAGAGGCAAGAGGTAAAGCAAATGGTGGTAGCTACCCTTG  
CTGAGTCTGGCATGAATCTCTCA  
GACGATGTCATAGAGAGCATTATTGACAAGACGTTTGAGGAAGCTGATACAAAACATG  
ATGGGAAGATTGACAAGGAAGA  
ATGGAGGAGTCTTGATTACGACATCCATCGCTTTTGAAGAATATGACGCTTCAGTACC  
TTAAGGATATCACGACGACAT  
TTCCAAGCTTTGTTTTTCACTCGAGAGTTGAGGATACATAA

>CsCML73

ATGGGTTTGAAAAATCTCTTAAATCGAAAGAAGAAAAAGAAAACAGGAGATGATAAC  
AGCACTCACGAATCTGAACCTCA  
ATCTGAACCCGCGTCACAAACAACAAACACGTCGAATAATATCAATGCCGAGGCATCG  
CAAGCCAAGTCTTTGGATTAC  
GCGTACGTATTGAAGAGGAGCTAGAGCAAGTTTTTAACAAATTTGACGTAAATGCTGAT  
GGAAAAATATGCGCGGCAGAG  
CTAGGATCCATAATGGGAAGCCTTGGACACCACCCGTCACAAGAGGAGCTAAAAAAC  
ATGATCAAGGAGGTGGATGCAGA  
CGGGGACGGCTTCATAAATTTGCAAGAATTTATTGAGTTGAACACGAAAGATATTGATT  
CGTCTGAGGTGTTGGAAAATC  
TAAAAGACGCGTTTTCTGTTTTTGATATTGATAAAAATGGCTTGATCACTGCAGAGGAG  
TTGTTGAATGTTTTGAGTAGT  
TTAGGAGAAAATTGCACTATCACCGAGAGCAAGAAAATGATAGCTGGTGCTGATCGTG  
ATGGCGATGGTATGATTAACCTT  
TGACGAGTTTAAAGGATATGATGATGTCTGGTTCTCGGTTTGATTCTGGGTTGCAAAAAC  
ATGAGATAGCGAAGGAAGATT

AA

>CsCML74

ATGTCACCCGAAACATCCAACCAATCGCCATCCGTATTCCCAACGGACAAAGAAGAAA  
TCAAGACCATCTTTAACCGTTT  
CGACACAAATGGTGATGGAAAGATCTCTGAGGACGAGCTAATCAATGTCTTGAAATCA  
CTAGGATCCGACACGTCTCCTG  
AAGAGGTCAAGCGCATATTGACAGAAACTGATACCAATTCTGATGGTTTCATTAGCCTA

GACGAGTTTGTGTATTTTGC  
AAAGGAATTGCGGGTGAATGTGATGGTGACGGGCTTAATGATCTTAAGGAAGCATTTA  
AGCTATACGATCAAGATAATAA  
TGGAGTCATTTACGCTAGCGAGTTGCATCAAATATTGAGCGGAATGGGGTTGAATTACA  
CGCTTAAGGATTGCGAGAATA  
TGATTAACTCGGTTGATTTCAGATGGTGATGGTTGCGTCGATTTTGAAGAATTTAGGAAA  
ATGATGTCTGAAGAATTAA

>CsCML75

ATGGCCGAAAAATTGACAGACGATCAAATTACCGAGTTCCGACAAGCATTTCATGA  
TCGATAAAGATTCTGATGGATT  
GATTAGTACAGAGGATTTAATAGGCGTGATTCAAACATTGAACGAAAACGCTACTAATG  
AAGAGGTTAAAGAAATGATGA  
ACGAAGTAGATACAAATGAAGAAGGCACAATCGATTTCCATGATTTTCTTAATATCATGT  
CCAAAAGAGTTAAAGAAAAT  
GCGAGTGACGAGCTAAAAGAAGCTTTCAAAGTATTCGATCGGAATCAAGATGGTTACA  
TTTCACCTGATGAGTTGCGAAA  
TGTTATGATAAACTTGGGGGAGCGATTAAAAGATGAAGAGCTGGAGCAAATGATGCGA  
GAAGCTGATCTTGATGGAGACG  
GTGTTATAAGTTATGATGAGTTCGTTCCGGGTTATGATGAACTCCTCCTGA

>CsCML76

ATGTTTGATCATGATGGTGATGGTAACATCACCATACAAGAGCTATCAAAGTCTCTTGA  
AAGCCTTGGTATGGTTATACC  
CGAGAAAGATCTTGAAAACATGATCAAACATATTGACACAAATGGTGATGGTTCCGTG  
AACATGGAGGAGTTTAAAGGGT  
TGTATGAAACAATAATGGAGGAGAAGGACGAAGAAGAGGATATTAAAGAAGCGTTTA  
ATGTTTTTGACAAAAACGGAGAT  
GGGTTTCATCTCGGTTGAGGAGCTTATGTCCGTTTTAACTTCACTTGGATTTAGACAAGG  
TCGAACCATCGAGGATTGCCA  
ACTTATGGTCAAGAAGGTGGATGAGGATGGCGACGGGATGGTTAACTATAAAGAGTTC  
AGGCAAATGATGAAAGGTGGCG  
GCTTTGCATCAATGTAA

>CsCML77

ATGGGAAACGATGATCATCTTAAAGATGCCTTTGCATTCTTTGATAAAAACAAAAGTGG  
GTACATAGAGATTGAAGAACT  
AAGGGAAGCCTTATCCGATGAAGATGAAGCCAACAGTGAAGAAGTAATTCGGCAATC  
ATTCATGATGTAGACACCGACA  
AGGACGGAAAGATTAGTTTTGAGGAATTCACGGCAATGATGAAGGCGGGAACGGATT  
GGAGAAAAGCATCACGACAATAT  
TCGAGAGAAAGATATAATAATTTGAGCTTGAAATTGTTCCAAGATGGATCATTGGTTTC  
AGCAAATGAGGGAAGATGA

>CsCaM4

ATGGCGGATCAGTTGACCGATGATCAGATCTCTGAGTTTAAGGAAGCTTTCAGTTTGTT  
TGACAAGGATGGCGATGGTTG  
CATCACCACAAAGGAGCTTGGGACTGTGATGAGATCCCTAGGGCAGAATCCCACAGA

AGCTGAACTTCAGGACATGATTA  
ATGAAGTTGATGCTGATGGAAACGGAACCATTGATTTCCCTGAGTTTCTAAATCTTATG  
GCCAGGAAGATGAAAGATACT  
GATTCAGAGGAAGAACTTAAGGAAGCATTTCAGAGTTTTTGACAAGGACCAAAATGGC  
TTCATTTCTGCTGCTGAATTGCG  
TCACGTTATGACAAATCTTGGTGAAGCTTACTGATGAAGAAGTTGATGAGATGATCC  
GAGAGGCTGATGTTGATGGTG  
ATGGTCAAATCAACTACGAGGAGTTTGTTAAGGTTATGATGGCCAAGTAA

>CsCML78

ATGAAGCTTCCCGCCAAAATCAACCCTAAGCACATCTTCCGATCAAGAAAACACAAAA  
CAGTCACCAGATCTGATCAATC  
TTCATTCAGTTCCTCCAATACGACGTCGTCAGACTCGCCAGAATCCAGTCATCACCGTC  
GCAAGGCCAATACTTCCGGCG  
TCACTACTCCGACGAGCGTCCTTCCTTCCTCCGCCGACGACTACTCCGACCTTCAACTC  
GACCTAATCCAAGCCTTCCGA  
TTCATCGACACCGACGGCGACGGAAAAATCACAACGCAAGAACTCGAAACGATCCTA  
AACCGTATCGTAAGATCTGAGCC  
GTTGATTCAATCAGAGCTGAAATCGATGTAAACCGAGATAGACAGTAACGGCGACGGC  
GTTATCACTTTAGAAGAATTTG  
GAGCGGTTAGTGAAGCTTTTGGACCGCGGTTGGCGACGGAGAGTTAAAAGAAGTGT  
TTGAGTTTTTTGACAGAGACGGT  
GACGGAAAGATAACGGCGGATGAGCTGTATGAGGTTTTTGTTCGCTAGGTGATGGGA  
AGGTGACTGTGGAGGAATGTGT  
TGGCATGATTAAAAGTGTTGATGTAAATGGAGATGGGTTTTGTTTGTTTGTATGATTTTAG  
GAGTATGATGGAACAAAGAT  
GA

>CsCML79

ATGAGCACATACAAAGACCGAAGTTGCCGCGCTACATCTCCAATGCCTAAATCCTTGCA  
AACACGCATAAGGAATCTCCT  
TAAGAGAGTCAACTTCTTAACCAAAGTCAATAACTTCAAGAAAAAACCACCCAAGAAT  
CCTTGTGTTCTAGATGCCATCT  
CATCATTTATAGCCATGGATGTCTCAAACCAACTCAAGCAAGTCTTCAAATCCTTCGATA  
TCGACGGTGATGGCAAGATT  
TCTCAAGTGGAGCTCACAAATGTTTTGTTGACTTTTGGTCAAGAGAAGTCAATGGCCA  
CAAAAGAAGCTCAAGGAATACT  
TAAAGAAGTTGATTTTAATGGAGATGGTTTCATTGACTTGGATGAATTTATGACCATTAT  
GGATGGTTCCAAGCCGTTTT  
TCGCTAGCTCAAAGGAAGATAATGGTGATGATGATCTTAGAAATGCTTTTATGGTTTTTG  
ATAGTGATAAAAATGGACTC  
ATTTCTGCAAAGGAGTTGCAAAGTGTGCTCACTAGTCTTGGATGTAGTAATTCCAAACT  
TGGACAATGTAGAAAAATGAT  
TAAAGGTGTTGATAAGGATGGTGATGGATTTGTAGACTTTGATGAATTTAAGTCAATGA  
TGTCATCGGGATTAAGTAG

>CsCML80

ATGGCAGAAAAAAGCTACCAAGACTTGCTTCCTATCATGGCTGAAAAGCTAGAGTTAA  
CAACCTTCATGGAGGAGTTATG  
TAGCGGTTTTTCGTCTGCTAGCTGACGAAAACACCGGCCTGATCACCCCTGAAAGTTTG  
AGAAAAAATTCAAGTATATTGG  
GTATGGAGGGAATGAGCAAAGAAGATTCAGAAGGTATGGTGATCGAAGGAGACCTTG  
ATGGAGATGGTTTTCTTGAACGAA  
ACCGAGTTTTGCATACTCATGGTGAGACTTAGTCCCGAAATGATGCAAGATGCTGAGAT  
GTGGTTGGACAAAGCGATTGA  
AGATGAGATCAAGAACGTCTCTACTTCATTACCAGATAATAAAGTTTAA

>CsCML81

ATGGCATCAACCAATAATATGCAATCTGAGTTCCAAGATTACTTGCCATTAATGGCTGAT  
AAGTTGGGTGGTGATGGTTT  
AATACAAGAACTATGTAATGGGTTTCAGTTACTTATGGATCAAGATAAAGGGGTGATTA  
CTTTTGATAGTTTGAAGAAGA  
ATTCATCAGTTTTGGGGCTTGAAGGATTGAGTGATGATGAAGTCATGAGTATGCTGAAA  
GAAGGTGATTTTGATGGTGAT  
GGTGCTTTGAATCAAATGGAGTTTTGTGTTCTTATGTTTAGATTAAGTCCGAATTTGATG  
GATCAATCTGAATACTTGTT  
GGAAGAAGCTTTGGAACAAGAGTTAAATAATTTTCAATACTGA

>CsCML82

ATGAGTCAACTAAAATCATCGTCGTTTCGTCTTAGATCACCCCTCGTTGAATTCTGTCCGT  
TTACGTCGTATTTTTGATTT  
GTTTGATACCAACCATGATGAGTTAATCACGGTTGATGAACTTAGCCGCGCTTTGATAC  
TTTTGGGACTTGATACTAATA  
TGAATGAATTGGATTCGATGATTAATACGTTTATTCAACCAGGGAATGCTGGGCTTACGT  
TTGATGATTTCCATGCTTTG  
CATAAGGAAATTGATGATTTGTTCTTTTCGTCTTGATGATAATGATGATTTAGGTAATCAA  
GATGAAGATAACGACGAGGC  
TAATGGCGATAAGCAAGAGGAGGCGGATCTAACTGAGGCATTTAAGGTTTTTCGATGAA  
GATGGAGATGGCTACATATCAG  
CGACCGAGTTACAAACTGTGCTTGTGAAGTTAGGGTTTGCCGAAGGTAATGAGATTGG  
AAGTGTGGAGAGAATGATATCA  
TCCGTTGATCGAAATCATGATGGACGTGTTGATTTACAGAGTTTAAAGACATGATGCG  
TAATGTGATCGTTCTCAAGTA

A
