# Supplementary material for: Genome-Wide Identification and Expression Analysis of CsCaM/CML Gene Family in Response to Low-Temperature and Salt Stresses in Chrysanthemum seticuspe
Source: MDPI journal article supplement (doi:10.3390/plants11131760), 2022-07-01
Supplement: s1 [file s1]

>CsCML1

MMSESNDSSRWSTLTLEEKVCGALVPLLAFAEILFAFSGCFDFGGAKKQNKHKLLPFDHH  
QLTRLASGSNFNVNEVEAL  
FELFKSLSSSIIDDGLIHKEELRLALFNTTPQGENLFLDRVFDLDFDEKRNQVIEFEFVHALSIF  
HPYAPIEDKINFAFRL  
YDLRQTGYIEREEVKQMLIAILTESEMNLSDDLLDVIIDKTFADADTDGDGKICKKEEWKEF  
ALRYPSLLKNMTLPYLADI  
TTAFPSFVFHTSVEDAT

>CsCML2

MGCFHSTVKKPVPGHENPTLLASQTAFSVSEVEALFELFKSISSSVIDDGLINKEEFQLALF  
KNRKKENLFANRIFDLFD  
VKQKGVIDFGDFVRALNVFHPNAPQEDKISFCFKLYDMDGTGFIERQEVKQMLIALLCES  
ELKLADDTIETILDKTFSEA  
DVDQDGKIDKSEWHNFVTHNPSSLKIMTLPYLRDITTTFPSFVFNSEVEEIIAT

>CsCML3

MGCFHSTVKKPVPGHENPTLLASQTAFSVSEVEALFELFKSISSSVIDDGLINKEEFQLALF  
KNRKKENLFANRIFDLFD  
VKQKGVIDFGDFVRALNVFHPNAPQEDKISFCFKLYDMDGTGFIERQEVKQMLIALLCES  
ELKLADDTIETILDKTFSEA  
DVDQDGKIDKSEWHNFVTHNPSSLKIMTLPYLRDITTTFPSFVFNSEVEEIIAT

>CsCML4

MIEKIDVNNDGCVDIDFEGELYKSIMDDRENEEDMMEAFNVFDINGDGFIAVEELRAVLES  
LGLKQGRKAEDCRKMIMKV  
DVDGDGMVSFDEFKEMMRSGGFAAMAQN

>CsCML5

MFDKNGDGRITKQELNDSLENMNIYICDNDLVHMEKIDVNNDGCVDIDFEGELYKSIMD  
DRENEEDMMEAFNVFDINGD  
GFIAVEELRAVLESGLKQGRKAEDCRKMIMKVDVDGDGMVSFDEFKEMMRSGGFAAM  
AQN

>CsCaM1

MADQLTDDQISEFKEAFSLFDKDGDCITTKELGTVMRSLGQNPTEAELQDMINEVDADG  
NGTIDFPEFLNLMARKMKDT  
DSEELKEAFRVFDKQNGFISAAELRHVMTNLGEKLTDEEVDEMIREADVDDGDGQINYE  
EFVKVMMAK

>CsCML6

MCPTGTLIPLATKQAE LRSAFNVMDVDHDGKISHDDLKRFYADYAVNDNEIIIGTMMKET  
DLNKDGYVEYEEFEKMLFLR  
RSSNVMEEVFNEIDKVGDANDDENDGVTFEGFLKILAI

>CsCML7

MNTSRPCPSLKSIFYEVGGMLRCCNSTNEYERLDSELERKMIEVKKRYVPGNSSIRSINSII  
LKFPQFRQGLEEIRGVFR  
QFDVDSNGTIDREELRKCLHKFQFDCTEDEINDLFESCNLGRNQGMKFNEFIVVLCIIYLL  
TCTSSSNHTATTMGSPCLK  
STFDTHIEAFLFLDKNGDGKLDKKDMTKAMNDDFPKEKSPNHITMSRFREMDWKNKGKV

GFREFLFLSLINWVGIDSNNEV

HVEVIREQKP

>CsCaM2

MADQLTDDQISEFKEAFSLFDKDGDCITTKELGTVMRSLGQNPTEAELQDMINEVDADG

NGTIDFPEFLNLMARKMKDT

DSEELKEAFRVFDKQNGFISAAELRHVMTNLGEKLTDEEVDEMIREADVDDGQINYE

EFVKIMMAK

>CsCML8

MKFFSTSNVSIPFSLERSEILVVKHDSNLSKAHVSFTNKNIVDDACVQRDDVELIMANLGV

FCHPEGEKVPEVMTSNDLF

NIFEDEQPRLDENVKQAFDVFDQNKDGFIDASELQRVLVVLGLKERSNIEDCRKMIRAFDEN

ADGRIDFDEFVKFMEATFC

>CsCML9

MFQPDVDEMRRVFNKFDKNKDGGKISKEEYGSAGVVLGSKNTKSDVIKTFQAIDTDGDGF

VDFNEFMQAQKSEGGVKTADI

KSAFKVFDLDGNGRITAEELVQVLRQLGERCSLESCRKMIKGVADGDGMIDVDEFMGL

MTRNMKLA

>CsCML10

MADADHQAANLERIFKKFDTNGDGKISSSELGEALKTLGSVSPEEVQRMMREIDTDGDGFI

SYQEYIDFCNANKGLMKDVS

KIV

>CsCML11

MADEDKAECDRIFGAFDKNNGDGKISAAELGESLTKLGSVSPEEVQTMDELDTDGDGNP

SISLGYKRNSNPIIRVSIHHL

V

>CsCML12

MSIMIAEFIQYLFHSVFLNMIIYPQLGYFLDDSKIHVEKRNKDSRLPKRLPSFKDGSVRGDE

VQTVMGNLGIFCNSKGES

FPERLSSNDLFNMFEEHPELDEVKGAFDVFDENKDGFIKELQRVLSALGLKDRAAM

DDCKKMIRVFDENDDGRIDFD

EFVKFMEGTFC

>CsCML13

MDKEQQYKRVFGHLDANGDGKLSPPELQICLGKIGGELSLEEAEIAAALMDSGDGGLLS

MEDLVNVVESANEEEEKIDDLK

MAFKMYEEKEGCITPKSLRRMLSKLGESERTVNDCKVMINKFDVNGDGVLNFDEFIMMA

>CsCML14

MDKEQQYKRVFGQLDANGDGKLSPPELQSCLGKIGGELSLEEAEIAAALMDSGDGGLLS

MEDLVNVVESANEEERINDLK

MAFKMYEEKEGCITPKSLRRMLSKLGESERTVNDCKVMIAFDVNGDGVLNFDEFIMMA

>CsCML15

MDKEQQYKRVFGHLDENGDGKLSPPQLQICLGKIGGELSLEEAEIAAALMDSGDGGLLS

MEDLVNLVESANEEERINDLK

MAFKMYEEKEGCITPKSLRRMLSKLGESERTVNDCKVMIAFDVNGDGVLNFDEFRLMM

A

>CsCML16

MDKEQQYKRVFGQLDANGDGKLSPELQICLGKIGGELSLEEAEIAAAWMDSDGDGLLS  
MEDLVNVVESANEEERINDLK  
MAFKMYEEKEGCITPKSLRRMLSKLGESRTVNDCKVMIARFDVNGDGVNLFDEFKIMMA

>CsCML17

MDKEQQYKRVFGHLDTNNGDGKLSPELQICFGKIGGELSLEEAEIAAALMSDGDGLLSM  
EDLVQAVEGANEEEEKINDLK  
MAFKMYEEKEGSGCITPKSLRRMLSKLGESRTVNDCKVMIAKFDVNGDGVNLFHEFREM  
MV

>CsCML18

MDKEQQYKSVFRHLDKNGDGKLSPELQTCIGKVGGEELSLEEAEEMAAALIDSDGDGLLS  
MEDLVKVVEGANEEEEKINDLK  
MAFKMYEETEGSGCITAESLRRTL SKLGESKTVDDCKIMIAKFDVNGDGVNLFDEFREM  
MA

>CsCML19

MATETTNPTTTTQQTSSSVNLTNIEEVKKVFNRFDTNHDGKISSSELISIMKSLGSNISEDEV  
RQMMTKIDTDNDGCITL  
EEFAGFCKDDTADDGGMKELHEAFELYDLNNNGLISSSELHQILTRLGESVSVEDCVGMIK  
SVDADGDGFVNFEFEKKMM  
SNGKTEP

>CsCML20

MGLKNLFKGKKKSTQNNNNVVVGVAVRNPNTSSPVL SRSSSCNSRARIEEELTQVFRKF  
DVNGDGKISASELGSIMGSL  
GQKPTETELNMIKEVDADGDGFIDLHEFIALNTKDIDSNELLENLKEAFCVFDIDKNGSIS  
AEELQKVLGRLEESCTIE  
ECRKMISGVDVDGDGMISFDEFKVMMSGNGFVSKKNNNREMKEE

>CsCML21

MSKVSVILYITVAILILISNKNTNNTSSNRHNRHRRLKLR SNFTTTPIPTTPIPTTPSDHHI  
SFDPLIADIERKRED  
KQWEQTHYFNKDHDVHDHGGDDVAPGMEGQPEWEDFIDAEDYLNDEHKFNITHRLVL  
LFPRIDVDPADGFVSEHELTQW  
NLEQSQREVLHRSQREMELHDKNRDGLVSFHEYSPPSWVRD TDNNSFGYDMGWWKEEH  
FNASDIDGDGFLNLTEFNDFQH  
PADTKNPRLLQWLCKEEVRERD TDKD GKVNFKEFFHGLFDLVRNYDEESHHSN  
DSLESPAKRFFSELDKDADGF  
LSDVELLPIIGKLHPSEYYAKQQADYIISQADTDKDGR LSLTEMIDSPYVFYSAIFNEDDE  
EDYEHDEFR

>CsCML22

MKTMTLKECCCFLKKLRNPSRIIQHALLASETSFTINEIEALYDLFERLSYAIIEDGRIHKEEF  
RLALFSNSTMQNLFAD  
RLFESFDIKKNGVIEFDEFVRSLSIFHPNAPESDKIEFMFRLYDLRHTGFIEREELKEMVVAL  
LSEMDVSVSDEDIEAIL  
DKTLLDADLNGDGKIDLEEWKIFISKNPSILKNMTLPLLREITQAFPNFVLNTQVQNLEVE  
V

>CsCML23

MSSDKEPTVKLDDEQLSELREIFRSFDRNNDGSLTQLELGSLRLSLGLTPSSDQLDTLIQKA  
DTNSNGLVEFSEFVALVA  
PELLPAKSPYTDDQLKQLFKMFDRDNGYITAAESFLAPLLQLLLIILFRDFGYSFAYLFVF  
R

>CsCML24

MGCCYSAMGVPVVARSDRTLASQTTFSVSEVEALFELFKSISSSVIDDGLISKEEFLLALF  
KNKRKKNLFANRIFSLFD  
VKRKGVIDFGDFVRSLSGVFHPRAPLEDKINFSFKLYDLEGTGFIERREVKQMLIALHSEL  
KLADAEIEMILDNTFSEA  
DGDRDGKIDRSEWHAFVTKNPSLLKTMPLVLRDITSAPPSFVFNTQVDEISSPQVEEVEIS  
SSQVEEIEISSSQVEEIP  
K

>CsCML25

MDKEQQYKRVFRHLDVNGDGKISPPPELQICIGKIGEDLSLEEAEIAAELMDSGDGGLLSFD  
DLVKVVESANEEEEKVKDLK  
LAFKMYEEMEGCGCITPKSLKRMLSKLGESERTVDECELMIKKFDLDGNGVLDQEFQDM  
MS

>CsCML26

MDKEQQYERVFKHLDVNGDGKISPPPELQICIGKIGEDLSLEEAEIAAELMDSGDGGLLSFD  
DLVKVVESANEEEEKVKDLK  
LAFKMYEEMEGCGCITPKSLKRMLSKLGESERTVDDCELMIKKFDLDGNGVLDQEFQDM  
MS

>CsCML27

MESNKVPKSFGCFPQKGLVLRLLSSFRSKSNNTSNSTSPTLMSPRSPKPNTNNREQEFRSVF  
ARFDADNDGKISALELRSY  
FGSIGEYMSHQEAQGVIDDLDTDGDGFIDFQDFMRLMKVSNEKDDVKA AFEMFEYEKGC  
GQISPKSLQKTL SRLGDSKTY  
DECLQMIKMFDTHGKGAVDFNEFQQMMTA

>CsCML28

MAQTDVEKVFKKFDVNGDGKISITELGSILAALSGAVTSETELKSVMKEIDTDGDGFIDFD  
EFVAFHNGNGEEEEESKELR  
EAFDLYDEDKNGKISANELHSVMKRLGEKCSLKDCKKMIQSVDVDGDGCVNFEEFKKM  
MNK

>CsCML29

MPAGYSWAKPPAMTLVHQNL SMGCFPRLVTPAFESYSCRWTIRTSALFVPQQRLFHDSAN  
NILILLAILSLLSRWGYLEK  
QNKAQPNIKSCFMEWRLKQVEAPLTDDQIKGLVSKFDTNGDGKISRREL RVGLKSLGLHF  
AGLRAMGAVRHADANGDGI  
SDEEINELAKYISKWGISVT

>CsCML30

MRQSWCLRQVEAAPLTEDQIKGLLRKFDANGDGKISRREL RAGLKSLGLRFACFRARRAL  
RYADANGDGVISDEEINELA  
RYVSKWDISLT

>CsCML31

MTRKSWCLKQVEMPMTDDQIKGLVNKFDTNNGDGKITRRELRVGLRKLGLRFATFRAMG  
AVRYADANGDGVISDEEINELA  
KYISKWGISVN

>CsCML32

MSLSEQFHIIIGDLHVFSTQFSNLCLHKAKFIIDTPPTKTCTAATAHEKAHATNLGGVENGPG  
KKKALGVNPKTMMERLGT  
FWDPDHREALDMDVMNLFVEDEPSLDEVKQAFGVFDKNNDGYVDAKELQNVLSNM  
GFLHICESDCRRMIVSYDADKDG  
KLSFREFLKVVEDGFR

>CsCML33

MSTLPEDQLNQLKEIFTRFDLDDKDGSLTHLEVAALLRSLGLKPSGDQIHKLFKNMDSGGS  
GTVEFDELVNSMSSHMMTEE  
ILVNQQQLMEIFRSFDRDGSFITPAELAKSMTKMGQPLTYRELSEMVRDADTDGDGVISF  
KEFQGIMARSAADSLGFSL

>CsCML34

MVVVHLDPILIHYNPGNDGRGGELVIIGNIEIELTDIGGKVMKAAKPALTFDDIRRLALNSP  
FTVNEVEALRELFNKLSS  
SIIDDGLIHKEELQLALLNSAGGENLFLNRVFDLFDEKQNGVIEFEEFIHVLSIFHPYAPIEEK  
IDFAFRLYDLRKTGYI  
EREEVKEMIVATLKETGMRLSEEILEEIIDNTFADADADMDGRINKEEWRDFVIQRPQLLK  
NMTLPSLRDVTTAFPSFIF  
NTGVDD

>CsCML35

MDPAELRRVFQMFDRNGDGKITKQELAKSLENLGIYIPDDDLAQMIKIDVNKDGFVDME  
EFGELYQTILGERDEEEDMR  
EAFNVFDQNRDGFITVEELRSVLSSLGLRQGRSIEECRLMIKKVDEDGDGMVNYKEFKQ  
MMKAGGFAGLET

>CsCML36

MSGYPQNPSGYGTPPAQPYGAPPQPYGQPPQQSYGQPPPAQPYGAPPAQPYGAPAQPYG  
APAQPYGAPSAPYGQNPKNP  
PKENKPQSGGGYGAAPPPGGAYGQGGAPYGSPFAALLPSTFPPGTDPNVVACFQVADQDG  
SGVIDDKELQRALSSYNQSF  
SLRTVHLLMYLFTNTNTRKIGPKEFIQVFYSLQNWRANFEKFDRDRSGKIDINELREALMS  
LGFAVSPVVDLLVSKFDK  
SGGKNKAIEYDNFIECCLTVKGLTEKFKEKDTSSYSGNATFTYEAFMLTVLPFLIA

>CsCML37

MKLSGRINPKNIFRSKSHKKDSVSRSESSSFSSSITTSSGSPERSKGATTPTTVLPTQPLTRSD  
LEALLRRITNDEAEVK  
LMLDEVEGDGEVEGTMTEFGEEEMRGAFEFFDSDGDGMITADELFQVFKVINGDDGCTL  
EESTIHQSLSSSNLLQISI  
FRCIRVIRHVKGTLKRERE

>CsCML38

MKEAFELFDTDGNGTIDAKELSNAMRALGFEMTKEQLDQMIADVDRDGS GAIDFDEFVY

MMSDKIGERSNKQELTKAFNI  
IDHDKNGKISILDIKNIAKELSVRFTDAEIHAMVEEADRDDDGEVSKEEFMRMMQTTSYG  
Y

>CsCML39

MRALGFEMTEEQINQMIADVDDKDGSGAIDFDEFAYMMTAKIGERDSKQELTKAFEIIDQD  
KNGKISVADIKKIAKELGEH  
FTDDEIHEMVEEADRDHDGEVSAEEFMRMMKRTSYGY

>CsCML40

MIYNYYNKSILEDLSGSFLLFSTRSDIFEPPVNDDRPSQTRSTRTFYRGKGEAVIFIKNSLQK  
MGVRRESSRSDQPRGRH  
HGLNPQKKQEINEAFDLFDTDGSGTIDAKELNVAMRALGFEMTEEQINQMIADVDDKDG  
GAIDRDEFYMMTAKIGERDS  
KQELKKAFFIIDQDKNGKISFADIKKIAKELGEHFTDAEIHAMVEEADCDDDRGEVSSEEF  
MKMMKRTSYGY

>CsCML41

MSKMSFLDIQYNISKRKFLRKPSRMFSSSERQPSGLPMFQPNVNEMRRVFDKFDKDKDGK  
ISRGEYKAILRALKQGGTER  
DIQKIFEVADLDGDGFIDFKEFMEVQKKGGAVKAVDVQSAFKTFDLGDGKISVEEVYEL  
MKRLGERCSLQDCRKMVRGV  
DSNQDGVIDIDEFMTMMTQNMKI

>CsCML42

MSNSSERKAELKSVMFATFDKNKDGFITKQELSDSLKNIGISTSEKDVVEMVQRVVDVNGDG  
LIDDEFCELFESMMSKEDM  
QGSKVGDDDDHEDGDLRDAFNVDGDKNGLISVEELGLVLDLGLFKEGKKLEDCKKMIS  
KVIDIDGGMINFNEFKSMMKS  
GVSLISVS

>CsCML43

MSSPPSYNDLYRLFKKLDQNGDGLVSPHELQWLLDTMKVSSSVDDLRYLTGKTNINFTEF  
LEFYGTITKEEKVTCDESE  
SDLFKAFEMFDKNRDGFICNEELMEALTRLGLWDDKSNMDVKSMIKAYDANCDGFIDFH  
EFKKMMA

>CsCML44

MSQCLEGIKHLCTSLSCCDLELTQSQGLDDPAILASQTVFSVSEIEALYELFKKISSAVND  
DGLINKEKFQLALFKTN  
KKESLFADRVFDLFDTKHNGILGFEEFARALSVFHPNAPIDDKINFSFQLYDLKQQGFIERQ  
EVKQMVVATLAESGMNLS  
DDVIESIIDKTFFEEADTKHDGKIDQEEWRNLVLRHPSLLKNMTLQYLDITTTFPSVFHRSR  
VEDM

>CsCML45

MAASKTQLEFHDHLPLIEEKLGGDGLIGELCKGFELIMDPNKGVITFDSLKNNASFLGLQD  
LSDDDLMSMLKEGDYDGDG  
ALNQMEFCVLMFRLSPDLMDQSEFLLEEALQEVKNSYQ

>CsCML46

MVQEEFQLALFRNRNKRNLFADRIFDLFDLKRNGVIECGEFVRS LGVFHPDAPTE DKIKFA

FRLYDLRQTGFIEREELNE  
MVIALLDESDLVLSERVEDVIEMIVDKTFSDADIKGDGKIDEEEWKQFVAHNPSLIKNMTPYL  
KIDITLAFPSFVVTSEVEDS  
EV

>CsCML47

MGCMCSSGIKHTPGYEDPAILANETPFTVSEVESLYELFNKLSSSIIDDGLIHKEEFQLALFR  
NRNKRNLFADRIFDLFD  
VKHNGVIERGEFVRSLSGVFHPDAPTEKDIEFAFRLYDLRQTGFIEREELNEMVIALLESDL  
VLSEDVIEMIVDKTFSDA  
DIKGDGKIDEEEWKQFVAHNPSLIKNMTPYLKDISLAFPSFVLTSECEVEDSEV

>CsCML48

MELTSVATAATTGGILSMEVKYFIILYMFVEWVKLLHDCYFLLARPMWRFISTTENTTCRP  
TPSTVAQAHDITQVFHAYN  
SRKKSLSGVLEIVLKRLLGMFCDHDDKGQIIGSDEILGLFDEDEPSLDEVKEAFSAFDRNKD  
GFIDAKELQHALSEMGCIQ  
ISESNCRMLIGGYDVDQDDKISFREFLKLMEDCF

>CsCML49

MGCISSTPKEFKKLPAYDPVALAAETPFTVNEVEALYELFEKLSSSVVDDGLIGKDEFNLA  
LFRNHSKRNLFADRIFDLF  
DVNRSGHIDFNEFVRSLSVFHPKAPQADKVLAFRLYDLRRTGFIEREELKDMVKALLSES  
DLVLSDEIIESMVDKTFAE  
ADYKGDGKIDQEEWREYVDKNPSLLKNMTLPHLMDITLRFPSFVMNSQVEETQSTD

>CsCML50

MSYNPSGYNYGAPPPSQPYYSTPYAAPSPYGGPQQPAFTSPYGYGTSTFPPGTDPNVIACF  
QVADIDRSGVVDDKELQIA  
LSSYNQSFSIRTVRLLMHHFTNTNTRKIGPKFTQVFYSLQNWRAIFEKFDRLSGHIDTW  
ELREALMSLGFTVSPVVLD  
LLVSKFDKTGGYKKAIEYDNFIECCLIVKGLTEKFKEKDTMYSGNATFTYEAFMLTVLPFL  
IV

>CsCML51

MGNTSSMLTQYDIEEVQEHENNTFSQQEIVSLYQRFQCLDRNSGGFISADEFLSVPEFAVN  
PLSQRLFRMIDGLNFKEFV  
AFLSAFSSRATLQHKVEFIFKVYDSGNGKVAFSDLLDVLRDLTGQFISEQQRELVLTVL  
EEAGYKKDSLVLVLSDFMKI  
LGNTGLKMEVEVPTNPSKYVGIISILNDVIGTLKIHKPYSSLSQTPLFNYYLTTQLTDRKWL  
DLV

>CsCML52

MSCLEGIRHLLAPLLRCFNLESFTKTNPLEDPEVLARETVFSVSEIEALYELFKKISSAVTDD  
GLISKEEFQLALFKTNK  
KESLFADRVFDLFDTKHNGILGFEEFARALSVFHPNAPVDEKIEFSFQLYDLKKQGFIERQE  
VKQMVAATLAESKMKLTD  
DVNIENIINTTFQEADTKHDGKIDMEEWRSLALRHPSLLKNMTLHYLKDITTTTFPSFVFHSR  
VEDS

>CsCML53

MGGKLTKADESPKTSVPTTKLEAKILETIRRRESKGTSMKSFNTIILKFPKIDASLRKCKAIF  
EQFDEDKSGTIDPKELN  
HCFRKLEIDFTDEEISDLFKECDINHDMGINFKEFIVLLCLVYLLKNDPVSPHSSSRMGMP  
LQAFETLVDSFVFLDKNK  
DGYVSRSEMVDAINETTTGERSSGRIAMRRFEEMDWDKNGMVNFKEFIFAFEKWIGIEDG  
EEDEEEVADEQE

>CsCML54

MASTNNMQSEFQDYLPMLADKLGGDGLIQELCNGFQLLMDQDKGVITFDSLKKNSSVLG  
LEGLSDDEVMSMLKEGDFDGD  
GALNQMEFCVLMFRLSPNLMDQSEYLLLEEALQELNNFQY

>CsCML55

MTTNYNSSFHDFLPLMADKLGGDGLVDELCKGFELLMDQDKGVITFDSLKKNSSVLGLE  
GLSDDEVMSMLKEGDFDGDGA  
LNQMEFCVLMFRLSPNLMDQSEYLLAALEQEFNYL

>CsCML56

MKAAITGLFNTQEVAQEYVVTGVGLLAGSTIFLLTLLWGTCHIGSQKFSSSEGASTSVDPT  
QCPNKKFFSFLTSSGVTT  
DPETCTAAQIMLLSVIPFLFLLIPKLFGMTYAPHGYIFLIALPVSVTFLLVYFIYQVFPSIQK  
RRLSYVKHEHLVLDIL  
KHLQEQIPENILAEDGSVNLPAIKSLFKKIDQDGDIIISFSELKELLESIKFRQLKSDKQKTF  
DQLIKEFDSGNAQVSL  
DEFIHRFTEWLDEAKNELSEVVKPLVQTKRNEDDMTQVLVSEIIGNAKSSPLGKFYKEDG  
TPDISAIKKLFRSLDVNKDG  
SVSLTELKKLTMHVNLGETSWNVDETTSRIMQNLDTNGDKEIDEQEFVDGFEEKLVNITN  
DRSKTSGPKDVSRKACKKWK  
GDNVDRSVWGWTKAIMLLVLGIAMLALMAEPLIHSVQNVSNSAAMPSFFISFILVPLATN  
ARAAISAIRTASQGKERTTS  
LTFSEQERINCFDQSKASMVEDDKHDNASSSASIREGNVSLQCPKLTDNYTTWALMMKT  
ILKAYGLWKVIDGMKETSG

>CsCML57

MGTSHTSPSFKSLSNKVGVMMLCCNSQNRERLDNKLKRMMEVKQNSIQGQTSFRSIDS  
IILRFPRFKEGLKEIQGVFE  
LYDEDSNGTIDNEELKRCLQKLEFHCTEQEIRDLFESCDVDGSNGIQFNEFIVLLCLYLLD  
GPSSSSHVTSTVGSPELK  
ATFDTHIEAFLFDKNGDGKLNKKDMMKAMNEDFPMEKSPHITKTRFKEMDWNKD GK  
VSFREFLFLINWVGLESTDEV  
PETVF

>CsCML58

MSYSGYNPNTTIPSAPPAPPSQSHQPATAYPYQQPPPQNYNNQQTYNPSGYGGGYGSQYG  
SYPPQQTVSFPPGTHPEVIR  
SFQAVDLDRSGFIDAKELQQALTQAYLKFSSRTIKLLMFQFRNPTDPTRTGPKFAELWSCL  
GQWRAIFERFDRDRSGKI  
DLAELRDALYSLGYAIPPSVLQLLISKYDDQSGRRVDLSFDSFVECGMIIKGLTEKFKEKDT  
RYTG SATLSYETFMTMVI



PFLVAE

>CsCML59

MAFGSQSNVLDPPPKFDMYKYTFVMTDADLEGVVAGYGHPWISEDGVAPDKPLDSAVLS  
RLTQFSAMNKLKRMALRVIVS  
KLSEEETAGLKQMFKMIDTDKSGYITFEELKAGLKRFGSTLNESEIYDLMQSADIDNGTID  
YEEFVASTLHMNKVDRDDH  
LFAAFSYFDKDDSGYITLDELQQACKEFGLDDVHLEEIKEADQNNVRFSLP

>CsCML60

MAEQLTEEQIAEFKEAFSLFDKDGDCITTKELGTVMRSLGQNPTEAELQDMINEVDADQ  
NGTIDFPEFLNLMARKMKDT  
DSEELKEAFKVFDKDQNGYISAAELRHVMTNLGEKLTDEEVDEMIREADMGDGQVN  
YEEFVRMMLAK

>CsCaM3

MRSLGQNPTEAELQDMINEVDADGNGTIDFPEFLNLMARKMKDSTDSEELKEAFRVFDK  
DQNGFISAAELRHVITNLGEK  
LTDEEVDEMIREA

>CsCML61

MSKSNDYKRVFDHFDEDSNGMVSPSELHRRVGMICHEQVLIEDVQVIVESLHGSKVDGH  
ELGFDDFVSLMESDNEDEKVE  
DLRKAFLRYENDGNDCTPKSLNRMLDRLGESRSVDECVGMINQFDLNGDGVLNFEEFK  
AMML

>CsCML62

MNSCEVLVKSLQASVQSLTHVSITWNLGSSISTSLDLNETVKKEFMLGEINVIMGQLGL  
QQRCSDDQDSNIDILSVFDD  
EEPTLEEVKVAFDVFDENS DGFIDENELRDMLCKLGKQENAMLKECRSMIKGFDVNGDG  
LIDFDEFVRLMETCSF

>CsCML63

MGLKNLFRNKTKNNTTKDNTTMVEETIATNTTLPVVPRQQTKEQQLEQVFKKLDVNNDG  
KISYSELGSVMGSLAGNQPTDD  
ELKKMIMEVDKDGDFIDLEEFIELNTKVDSSELLELIEKAFSMFDVDKNGLITVEELLRV  
MRSLHEDYSIEECKKMIAG  
VDQDGDGMINLNEFKVMMMSGVRSDVSES

>CsCML64

MNTGEPSTSSSPVKFFRPPTTISPPSSPLPTPCTDDIHQLFNYFDENGDKITATELQNRLK  
TVAGDEVQLSDEEAEMA  
VRSSDADGDGVLFDDFTKMMKEGAEELREAFRMYSAKSGTVITANSRRMLRRLGQS  
TVTVEECKGMIGRFDVNGDAV  
LDYDEFRAMMS

>CsCML65

METQTPTS KHAPLLKSCSNGSFRLRSPSLNSLRLRRIFDLFDSNHDSFITIEEITRALTLGLD  
TNASDLDTMIKSYVHP  
GNVGLTYEDFVTLHRSINDLFFGMDEVVEAVGSKEDQEEADLNEAFKVFDENG DGFISAA  
ELQMVLGKLGFTAEIEMGRV  
KMMISSVDLNHDGCVDFSEFKDMMRVLQ

>CsCML66

MCDDSGVPHRFVLDIQVLQEISLLDSVAETA VEMMNILKKIKKNVKTASKPISNKKIKHDPE  
KKPKSIVDVGCGIGGSSRF  
LAKKYGAKCRGITLNPVQAERAQVLADAQGLGDKPLSEVPHQGIPRVSVILVDSFQAQLD  
ALIQKGD TNSNGLVDFSEFV  
ALVAPELLSAKLPTYDDQLKQLFKMFDRDGN GYIMAAELAHSMAKLGHP LTAEELTGM I  
KEADTDGDGRINFQEFSCAIT  
SAAFDNSFS

>CsCML67

MCPTGTSLFPSRNITNLRSAFDILDVDHDGKISHEDLKTSYSHADDNIIGTMMKVADSNNN  
GYVEYDEFEKVV LKTDGSN  
VYGV MEDVFKAMDCDGDGKVGYGDLRSYLN MAGLDVNDDEIKAMIRFGGGGDYDDG  
VTFDGFILSL

>CsCML68

MARVLAVQQRKQLLEIFKQFDMDSDSLTYLELAALLRSIGLNLSGDQIYTLFNKIDSDGN  
GKVTFEAFVDAMTIDVKTE  
EIVIDQRQLFEAFRSFDREGNGFITPTQLA ISMAKMGYPLTYHELVAFIEGLFVGLTRTLERL  
VSELADFCIELCRTLEV  
KVGMQRLTSHPTYVVF

>CsCML69

MSSNNEANFHDFLPIMADKLGGERLMDEL CNGFRMLMDPIKRVVTFDSLKKNSAVLGIG  
DLTND DVLSMLKEGDL DGDGV  
LNQMEFCVLMFRLSPDLMKQSWFLLEEALRTIVEFESN

>CsCML70

MLTLDPKKRITSAQVLEHPWIREDGEASDKPIDSAVLSRMKQFRAMTKLKKLALKVIAQN  
LTTEEIQGLKSMFMNMDTDK  
SGTITIEELKTGLARLGSKLTESEVRQLMDAADVDGNGSIDYIEFITARMHRHKLEREEDL  
YKAFQHFD TDGSGFITRDE  
LENAMKENGLGDEATIKDIISEVDTDNDGKIN YEEFCTMMRSGTQGAKLF

>CsCML71

MLTLDPKKRITSAQVLEHPWIREDGEASDKPIDSAVLSRMKQFRAMNKLKKLALKVIAEN  
LTTEEIQGLKSMFMNMDTDK  
SGTITYEELKTGLARLGSKLTEAEVRQLMDAADVDGNGSIDYIEFITATMHRHKLEREEDL  
YKAFQHFD TDGSGFITRDE  
LENAMKENGLGDEATIKDIISEVDTDNDGKIN YEEFCTMMRSGTQGAKLF

>CsCML72

MTQCLEGIRHLLASILRCCDLELYKQSRGLDDPEILARETVFSVSEIEALYELFKKISSAVID  
DGLINKEEFQLALFKTN  
KKESLFADRVFDLFDTKHNGILGFEEFARALSVFHPNAPIDDKIEFSFQLYDLKQQGFIERQ  
EVKQMVVATLAESGMNLS  
DDVIESIIDKTFEEADTKHDGKIDKEEWRSVLVRHPSLLKNMTLQYLDITTTFPSVFVHSR  
VEDT

>CsCML73

MGLKNLLNRKKKKKTGDDNSTHESEPQSEPASQTTNTSN NINAEASQAKSLDSRVRIEEE

LEQVFNKFVDVNADGKICAAE  
LGSIMGSLGHHPSQEELKNMIKEVDADGDGFINLQEFIELNTKDIDSSEVLENLKDAFSVF  
DIDKNGLITAEELNLVSS  
LGENCTITESKKMIAGADRDGDGMINFDEFKDMMSGSRFDSGLQKHEIAKED  
>CsCML74  
MSPETSNQSPSVFPTDKEEIKTIFNRFDTNNGDGKISEDELINVLKSLGSDTSPEEVKRILTET  
DTNSDGFISLDEFVFC  
KGIAGECDGDGLNDLKEAFKLYDQDNNGVISASELHQILSGMGLNYTLKDCENMINSVD  
SDGDGCVDFEFRKMMMSKN  
>CsCML75  
MAEKLTDQITEFRQAFSMIDKSDGLISTEDLIGVIQTLNENATNEEVKEMMNEVDTNEE  
GTIDFHDFLNIMSKRVKEN  
ASDELKEAFKVFDNRNQDGYISPDELNRVMINLGERLKDEELEQMMREADLDGDGVISYD  
EFVRVMMNSS  
>CsCML76  
MFDHDGDGNITIQELSKSLESLSGMVPEKDLENMIKHIDTNGDGSVNMEEFKGLYETIMEE  
KDEEEDIKEAFNVFDKNGD  
GFISVEELMSVLTSLGFRQGRITIEDCQLMVKKVDEDGDGMVNYKEFRQMMKGGGFASM  
>CsCML77  
MGNDHLKDAFAFFDKNKSgyIEIEELREALSDEDEANSEEVISAIHDVDTDKDGKISFEE  
FTAMMKAGTDWRKASRQY  
SRERYNNLSLKLFDGSLVSANEGR  
>CsCaM4  
MADQLTDQISEFKEAFSLFDKDGDCITTKELGTVMRSLGQNPTEAELQDMINEVDADG  
NGTIDFPEFLNLMARKMKDT  
DSEELKEAFRVFDKQNGFISAAELRHVMTNLGEKLTDEEVDEMIREADVGDGQINYE  
EFVKVMMAK  
>CsCML78  
MKLPAKINPKHIFRSRKHKTVTRSDQSSFSSNTTSSDSPESSHHRRKANTSGVTTPTSVP  
SSADDYSDDLQDLIAFR  
FIDTDGDGKITTELETLNRIVRSEPLIQSELKSMLTEIDSNGDGVITLEEFGAVSEAFGPAV  
GDGELKEVFEFFDRDG  
DGKITADELYEVFVSLGDGKVTVEECVGMKSVDVNGDGFVCFDDFRSMMEQR  
>CsCML79  
MSTYKDRSCRATSPMPKSLQTRIRNLLKRVNFLTkvNNFkkkPPKNPCVLDAISSFIAMDV  
SNQLKQVFKFFDIDGDGKI  
SQVELTNVLLTFGQEKSMATKEAQGILKEVDFNGDGFIDLDEFMTIMDGSKPVFASKEDN  
GDDDLRNAFMVFDSDKNGL  
ISAKELQSVLTSLGCSNSKLGQCRKMIKGVDKDGDGFVDFDEFKSMMSIGIK  
>CsCML80  
MAEKSYQDLLPIMAEKLELTTFMEELCSGFRLLADENTGLITPESLRKNSSILGMEGMSKE  
DSEGMVIEGDLDDGDGFLNE  
TEFCILMVRLSPEMMQDAEMWLDKAIEDEIKNVSTSLPDNKV  
>CsCML81

MASTNNMQSEFQDYLPMLADKLGGDGLIQELCNGFQLLMDQDKGVITFDSLKKNSSVLG  
LEGLSDDEVMSMLKEGDFDGD

GALNQMEFCVLMFRLSPNLMQSEYLLLEEALQELNNFQY

>CsCML82

MSQLKSSSFRLRSPSLNSVRLRRIFDLFDTNHDELITVDELSRALILLGLDTNMNELDSMIN  
TFIQPGNAGLTFDDFHAL

HKEIDDLFFRLDDNDDLGNQDEDNDEANGDKQEEADLTEAFKVFDEDGDGYISATELQT  
VLVKLGFAGNEIGSVERMIS

SVDRNHDGRVDFTEFKDMMRNIVIVLK

>AtCaM1|AT5G37780.3

MADQLTDEQISEFKEAFSLFDKGDGVFVLSDLGDFDKRLSNCLETTPELSHGCITTKELGT  
VMRSLGQNPTEAELQDMIN

EVDADGNGTIDFPEFLNLMAKKMKDTSSEEELKEAFRVFDKQNGFISAAELRHVMTNL  
GEKLTDEEVEEMIREADVDGD

GQINYEEFVKIMMAK

>AtCaM4|AT1G66410.2

MADQLTDEQISEFKEAFSLFDKGDGDSISDSCGCITTKELGTVMRSLGQNPTEAELQD  
MINEVDADGNGTIDFPEFL

NLMAKKMKDTSSEEELKEAFRVFDKQNGFISAAELRHVMTNLGEKLTDEEVEEMIREA  
DVDGDGQINYEEFVKIMMAK

>AtCaM5|AT2G27030.3

MADQLTDDQISEFKEAFSLFDKGDGCITTKELGTVMRSLGQNPTEAELQDMINEVDADG  
NGTIDFPEFLNLMARKMKDT

DSEEELKEAFRVFDKQNGFISAAELRHVMTNLGEKLTDEEVDemiKEADVDGDGQINYE  
EFVKVMMAKRRGKRVMAAKR

SSNSAEYKEKNGRRKSHCRIL

>AtCaM3|AT2G27030.3

MADQLTDDQISEFKEAFSLFDKGDGCITTKELGTVMRSLGQNPTEAELQDMINEVDADG  
NGTIDFPEFLNLMARKMKDT

DSEEELKEAFRVFDKQNGFISAAELRHVMTNLGEKLTDEEVDemiKEADVDGDGQINYE  
EFVKVMMAK

>AtCaM2|AT2G41110.2

MADQLTDDQISEFKEAFSLFDKGDGMLHPPFPSIIVGCITTKELGTVMRSLGQNPTEAEL  
QDMINEVDADGNGTIDFPE

FLNLMARKMKDTSSEEELKEAFRVFDKQNGFISAAELRHVMTNLGEKLTDEEVDemiK  
EADVDGDGQINYEEFVKVMMA

K

>AtCaM6|AT5G21274.1

MADQLTDDQISEFKEAFSLFDKGDGCITTKELGTVMRSLGQNPTEAELQDMINEVDADG  
NGTIDFPEFLNLMARKMKDT

DSEEELKEAFRVFDKQNGFISAAELRHVMTNLGEKLSDEEVDemiREADVDGDGQINYE  
EFVKVMMAK

>AtCaM7|AT3G43810.2

MADQLTDDQISEFKEAFSLFDKGDGCITTKELGTVMRSLGQNPTEAELQDMINEVDADG

NGTIDFPEFLNLMARKMKDT

DSEELKEAFRVFDKQNGFISAAELRHVMTNLGEKLTDEEVDEMIREADVDDGGQINYE  
EFVKVMMAK

>AtCML1|AT3G59450.1

MPIFQWLKRCLCGDTNITIDQAIALVDEEIANLRKLERGYQTNIRNAENARDQTNVQIERD  
SFNDTIRLLQAECNLINLE

IPTLNEEKFAITRLKSAKHFFGAVSSLKEGKALECCKEMIKQVDEDGHGRVDYKEFLQMM  
KTGDFSNR

>AtCML2|AT4G12860.1

MDRGELSRVFMFDKNGDGKIAKNELKDFFSVGIMVPENEINEMIAKMDVNGDGAMD  
IDFGSLYQEMVEEKEEEEDMR

EAFRVFDQNGDGFITDEELRSVLASMGLKQGRTLEDCKKMISKVDVDGDGMVNFKEFKQ  
MMRGGGFAALSSN

>AtCML3|AT3G07490.1

MDQAEALARIFQMFDNRNGDGKITKQELNDSLENLGIYIPDKDLVQMIEKIDLNGDGYVDIEE  
FGGLYQTIMEERDEEEDMR

EAFNVFDQNRDGFITVEELRSVLASLGLKQGRTLEDCKRMISKVDVDGDGMVNFKEFKQ  
MMKGGGFAALGSNL

>AtCML4|AT3G59440.1

MVRVFLLYNLFNSFLLCLVPKKLRVFFPPSWYIDDKNPPPPDESETESPVDLKRVFQMFDK  
NGDGRITKEELNDSLENLG

IFMPDKDLIQMIQKMDANGDGCVDINEFESLYGSIVEEKEEGDMRDAFNVFDQDGDGFIT  
VEELNSVMTSLGLKQGKTLE

CKKEMIMQVDEDGDGRVNYKEFLQMMKSGDFSNS

>AtCML5|AT2G43290.1

MVRIFLLYNILNSFLLSLVPKKLRTLFPLSWFDKTLHKNSPPSPSTMLPSPSSSSAPTKRIDPS  
ELKRVFQMFDKNGDGR

ITKEELNDSLENLGIYIPDKDLTQMIHKIDANGDGCVDIDEFESLYSSIVDEHHNDGETEEE  
DMKDAFNVFDQDGDGFIT

VEELKSVMASLGLKQGKTLDGCKKMIMQVDADGDGRVNYKEFLQMMKGGGFSSN

>AtCML6|AT4G03290.1

MDSTELNRVFMFDKDGDKITTKELNESFKNLGIHPEDELTQIIQKIDVNGDGCVDIEEF  
GELYKTIMVEDEDEVGEE

DMKEAFNVFDRNGDGFITVDELKAVLSSLGLKQGKTLEECRKMIMQVDVDGDGRVNYM  
EFRQMMKKGRFFSSL

>AtCML7|AT1G05990.1

MDPTELKRVFQMFDKNGDGTITGKELSETLRSLGIYIPDKELTQMIEKIDVNGDGCVDIDE  
FGELYKTIMDEEEDDEEDM

KEAFNVFDQNGDGFITVDELKAVLSSLGLKQGKTLDCKKMIKKVDVDGDGRVNYKEFR  
QMMKGGGFNSL

>AtCML8|AT4G14640.1

MEETALTKDQITEFKEAFCLFDKDGDCITVEELATVIRSLDQNPTEQELHDIITEIDSDSNG  
TIEFAEFLNMAKKLQE

SDAEELKEAFKVFDDKQNGYISASELSHVMINLGEKLTDEEVEQMIKEADLDGDGQVN

YDEFVKMMINID

>AtCML9|AT3G51920.1

MADAFTDEQIQEFYEAFLIDKDSGDFITKEKLTVMKSMGKNPKAEQLQQMMSDVIDF  
GNGGITFDDFLYIMAQNTSQE  
SASDELIEVFRVFDRLDGLISQLELGEGMKDMGMKITAEAEHMOVREADLDGDGFLSFH  
EFSKMMIAASY

>AtCML10|AT2G41090.1

MANKFTRQQISEFREQFSVYDKNGDGHITTEEFGAVMRSGLNLTAELQEEINDSDLDG  
DGTINFTEFLCAMAKDTYSE  
KDLKKDFRLFDIDKNGFISAAEMRYVRTILRWKQTDEEIDEIKAADVDDGDGQINYREFAR  
LMMAKNQGHDTKYDTTGGT  
LERDLAAGVAKNIIAAPMTDFIKNLFEALFS

>AtCML11|AT3G22930.1

MEEIQQQQQQQQQQQQQQQQQQQQQQELTQEIQIMEFKEAFCLFDKDGDCITADELATV  
IRSLDQNPTEQELQDMITEID  
SDGNGTIEFSEFLNLMANQLQETDADEELKEAFKVFDKQNGYISASELRHVMINLGEKL  
TDEEVDQMIKEADLDGDGQV  
NYDEFVRMMMING

>AtCML12|AT2G41100.4

MADKLTDDQITEYRESFRLFDKNGDGSITKKELGTMMRSIGEKPTKADLQDLMNEADLD  
GDGTIDFPEFLCVMMAKNQGH  
QAPRHTKKTMAADKLTDDQITEYRESFRLFDKNGDGSITKKELRTVMFSLGKNRTKADLQ  
DMMNEVDLDGDGTIDFPEFLY  
LMAKNQGHQAPRHTKKTMDVYQLTDDQILEFREAFRVFDKNGDGYITVNELRTTMRSL  
GETQTKAELQDMINEADADGD  
GTISFSEFVCVMTGKMIDTQSKKETRYRVVNQGGQVQRHTRNDRAGGTNWERDIAVGVA  
SNIIASPISEFMKDRFKDLFE

ALLS

>AtCML13|AT1G12310.1

MGKDGLSDDQVSSMKEAFMLFDTDGDGKIAPSELGILMRSLGGNPTQAQLKSIIASENLS  
SPDFDNRLDLMAKHLKTEP  
FDRQLRDAFKVLDKEGTGFVAVADLRHILTSIGEKLEPNEFDEWIKVVDVGSDGKIRYEDFI  
ARMVAK

>AtCML14|AT1G62820.1

MSKDGLSNDQVSSMKEAFMLFDTDGDGKIAPSELGILMRSLGGNPTESQLKSIITTENLSS  
PFDFNRFLDLMAKHLKTEP  
FDRQLRDAFKVLDKEGTGFVAVADLRHILTSIGEKLPSEFDEWIKVVDVGSDGKIRYEDFI  
ARMVAK

>AtCML15|AT1G18530.1

MEDQIRQLKDIFDRFMDADGSLTILELAALLRSLGLKPSGDQIHVLLASMDSNGNGFVEF  
DELVGITLPLNNEVLINS  
EQLEIFKSFDRDGNGFISAAELAGAMAKMGQPLTYKELTEMIKEADTNGDGVISFGEFAS  
IMAKSAVDYFGLKINS

>AtCML16|AT3G25600.1

MASTKPTDQIKQLKDIFARFDMDKDGSALTQLELAALLRSLGIKPRGDQISLLLNQIDRNGN  
GSVEFDELVVAILPDINEE  
VLINQEQLMEVFRSFDNRDNGSITAAELAGSMAKMGHPLTYRELTEMMTEADSNQDQVI  
SFNEFSHIMAKSAADFLGLTA  
S

>AtCML17|AT1G32250.1

MSHKVSKKLDEEQINELREIFRSFDRNKDGSALTQLELGSLLRALGVKPSPDQFETLIDKAD  
TKSNGLVEFPEFVALVSPE  
LLSPAKRTTPYTEEQLLRLFRIFDTDNGFITAAELAHSMAKLGHALTVAELTGMIKEADS  
DGDGRINFQEFKAINSAA  
FDDIWG

>AtCML18|AT3G03000.1

MSCDGGKPAPAKLGDEQLAELREIFRSFDQNKDGSLTELELGSLLRSLGLKPSQDQLDTLI  
QKADRNNNGLVEFSEFVAL  
VEPDLVKCPYTDDQLKAIFRMFDRDNGYITAAELAHSMAKLGHALTAEELTGMIKEADR  
DGDGCIDFQEFVQAITSAAF  
DNAWG

>AtCML19|AT4G37010.2

MANYMSEAAQLRRGLKPKGKTYGLTNQKRREIREIFDLFDIDGSGSIDASELNVAMRSLG  
FEMNNQQINELMAEVDKNQS  
GAIDFDEFVHMMTTKFGERDSIDELSKAFKIIDHDNNGKISPRDIKMIKELGENFTDNDIE  
EMIEEADRDKDGEVNLEE  
FMKMMKRTSYG

>AtCML20|AT3G50360.1

MSSYRTVSRKEKPRRHHGLTTQKKQEIKEAFELFDTDGSGTIDAKELNVAMRALGFEMT  
EEQINKMIADVDDKDGSGAID  
FDEFVHMMTAKIGERDTKEELTKAFQIIDLDKNGKISPDDIKRMAKDLGENFTDAEIREMV  
EEADRDRDGEVNMDEFMRM  
MRRTAYGGN

>AtCML21|AT4G26470.1

MGGAVTKSETLQKEWVPETKLEAKIIEAVQRRASRGTTMKSFNSIVLKFPKIDDGLRNCK  
AIFQEFDSDSNGSIDHTELK  
NCIRKLEISFDEEEINDLFKACDINEDMGITFTEFIVLLCLVYLLKDDSSSTLQKKWTMGMPK  
LEPTFETLVDTFVFLDEN  
KDGYSREEMVRAIDESGERSSGRIAMKRFEEMDWDKNGMVNFKEFLFAFTQWVGIDE  
NEEEEEEDNNEKA

>AtCML22|AT3G24110.1

MRNMLCCCVNSENKKYAELDAKLARKMVESRSIYPGHRSLKSMDSIIMKFPKLREGLR  
NIRSVFESYDNDTNGTIDIEE  
LKKCLEELKLSLSDDEEVKGLYSWCDVDGSKGIQFNEFIVLLCLYLLAKPSSESSTESREMG  
PKLVESIFDPIVEVFLFL  
DKDGKGKLNKADVIKTLNNEDYPLERSPSHVTNMRFEEMDWGRKGKVGREFLFAFMS  
WVGLDDADDDFMSS

>AtCML23|AT1G66400.1

MSKNVSRNCLGSMEDIKKVFQRFDKNNDGKISIDELKDVIGALSPNASQEETKAMMKEF  
DLDGNGFIDLDEFVALFQISD  
QSSNSAIRDLKEAFDLYDLDRNGRISANELHSVMKNLGEKCSIQDCQRMINKVDSGDG  
CVDFEFFKKMMMINGSA

>AtCML24|AT5G37770.1

MSSKNGVVRSCLGSMDDIKKFQRFDKNGDGKISVDELKEVIRALSPTASPEETVTMMK  
QFDLDGNGFIDLDEFVALFQI  
GIGGGGNNRNDVSDLKEAFELYDLGNGRISAKELHSVMKNLGEKCSVQDCKKMISKVD  
IDGDGCVNFDEFKKMMSNGGG

A

>AtCML25|AT1G24620.1

MFNKNQGSNGGSSSNVGIGADSPYLQKARSGKTEIRELEAVFKKFDVNGDGKISSKELGA  
IMTSLGHEVPPEEELEKAITE  
IDRKGDGYINFEEFVELNTKGMDQNDVLENLKDAFSVYDIDGNGSISAEELHEVLRSLGD  
ECSIAECCRKMIGGVDDKGDG  
TIDFEFFKIMMTMGSRDNDVMGGGPR

>AtCML26|AT1G73630.1

MANTNLESTNKSTTPSTDMELKKVFDKFDANGDGKISVSELGNVFKSMGTSYTEEELNR  
VLDEIDIDCDGFINQEEFATI  
CRSSSSAVEIREAFDLYDQKNGLISSSEIHKVLNRLGMTCSVEDCVRMIGHVDTDGDGN  
VNFEFFQKMMSSPELVKGTV

ANS

>AtCML27|AT1G18210.2

MASANPETAKPTPATVDMANPEELKKVFDQFDSNGDGKISVLELGGVFKAMGTSYTETE  
LNRVLEEVDTD RDGYINLDEF  
STLCRSSSSAAEIRDAFDLYDQDKNGLISASELHQVLNRLGMSCSVEDCTRMIGPVDADG  
DGNVNFEEFQKMMTSSSLLN  
SNGSAAPPST

>AtCML28|AT3G03430.1

MADATEKAEHDRIFKKFDANGDGKISAAELGDALKNLGSVTHEDIKRMMAEIDTDGDGY  
ISYQEFIDFASANRGLMKDVA  
KIF

>AtCML29|AT5G17480.1

MADATEKAEHDRIFKKFDANGDGKISAAELEEALKTLSVTADDVKRMMAEIDTDGDG  
NISYQEFTDFAGANRGLMKDVA  
KIF

>AtCML30|AT2G15680.1

MSNVSFLELQYKLSKNKMLRKPSRMFSRDRQSSGLSSPGGFSQPSVNEMRRVFSRFDL  
DKDGKISQTEYKVVLRALGQ  
ERAIEDVPKIFKAVDLDGDFIDFREFIDAYKRSGGIRSSDIRNSFWTFDLNGDGKISAEV  
MSVLWKLGERCSLEDCNR  
MVRAVDADGDGLVNMEEFIKMMSSNNV

>AtCML31|AT2G36180.1

MAEIFESVDKNKDGKILWDEFAEAIKRVFSPQITSEEIDKMFIVLDVDGDGQIDDVEFASCLM



VNGGGEKDTEEEVVMKEA  
FDLYDMDGDGKISASEIHVVLKRLGEKHTMEDCVVMVQTVDKDSDGFVNFEFEKIMMN  
SNKESH  
>AtCML32|AT5G17470.1  
MSVAEIFERVDKNKDGKISWDEF AEAIRAFSPSITSEEIDNMFREIDVDGDNQIDVAEYASC  
LMLGGEGNKEDEDIVMKE  
AFDLYDIDGDGKISASEIHVVLKRLGEKQTIAECIAMVRAVDADGDGFVSFEFEKTMMS  
NNKKLQ  
>AtCML33|AT3G03400.1  
MNNMSLSDIFERFDTSKDGKISWEEFRDAIHALSPSIPSEKLVEMFIQLDTNGDGQVDA  
AKFASCMDQTAQSSGGDVEKE  
LKDAFKLYDINCDGKISANELHVVMTRLGEKCTVESCVGMVQAIDVDGDGYIRFVG  
>AtCML34|AT3G03410.1  
MSAKRVFEKFDKNKDGKLSLDEFREVALAFSPYFTQEDIVKFFEEIDVDGNGELNADE  
FTSCIEKMLKEVFVFCDDVDGDG  
KIPASESYVTMTSLGKKFTEETS AEKVRAADVDDG DYLNDFEFMALVIGDI  
>AtCML35|AT2G41410.1  
MKLAASLNRLSPKRLFRTKSKASVSRSEPSSFSSNASSSSSDGSYGNLKQGPTATPISV  
LPQNSGDFYTELVQAFKLIDR  
DDDGVVSRGDLAALISRLSHEPPSQEEVSLMLREVDGGDGGCISLEDLASRVAGTSGE  
GSVETEELREVFEIFDVDRNGK  
ISAEELHRVFGVIGDERCTLEECMRMIATVDGNGDGFVCFDDFCRMMVPAMNDHHH  
>AtCML36|AT3G10190.1  
MKLAKLIPKRFFIRSKDRSTVSKSPTAFSFGSASSSSGQDCKNSGGDGGGGSVTPTSIL  
PEVPSPYSYVEILQAFKLIDR  
DNDGAVSRHDLESLLSRLGPDPLTEEEINVMLKEVDCDGDGTIRLEELASRVVSLDPAR  
DSTELKETFEFFDADRDLIS  
ADELLRVFSTIGDERCTLDCKRMIADVDEDDGDFVCFTEFSRMMDLQR  
>AtCML37|AT5G42380.1  
MTLAKNQKSSLSRLYKKVSSKRSESSRNLEDESRTSSNSSGSSSLNVNELRTVFDYMDAN  
SDGKISGEELQSCVSLLGGA  
LSSREVEEVVKTSDDVDGDGFIDFEEFLKLMEGEDGSDEERRKELKEAFGMVMEGEEFIT  
AASLRRTLSRLGESCTVDAC  
KVMIRGFDQNDDGVLSFDEFVLMMR  
>AtCML38|AT1G76650.1  
MKNNTQPQSSFKKLCRKLSPKREDSAGEIQQHNSNGEDKNRELEAVFSYMDANRDGRIS  
PEELQKSFMTLGEQLSDEEA  
VAAVRLSDTDGDGMLDFEEFSQLIKVDDEEEKKMELKGAFRLYIAEGEDCITPRSLKMML  
KKLGESRTTDDCRVMISAFD  
LNADGVLSFDEFALMMR  
>AtCML39|AT1G76640.1  
MKNTQRQLSSSFMKFLEEKNRDLEAVFAYMDANRDGRISAEELKKSFKTLGEQMSDEEA  
EAAVKLSDDIDGDGMLDINEFA  
LLIKGNDEFTEEEKKRKIMEAFRMYIADGEDCITPGSLKMMLMKLGESRTTDDCKVMIQA

FDLNADGVLSFDEFALMMR

>AtCML40|AT3G01830.1

MKSENVNKRDEYQRFVSCFDKSHQGVSVSTIERCVDAIKSGKRAVVDQEDTTNPNPEES  
TDDKSLELEDVFKLVEEGEE  
ADKEKDLKEAFKLYEESEGITPKSLKRMLSSLGESKSLKDCEVMISQFDINRDGIINFDEFR  
AMMQ

>AtCML41|AT3G50770.1

MATQKEKPSSNSFKWFSTKTLKLNLSFQNRRRSPKSNSSSTLNSPRSNSDDNNNIKSHQAS  
KEELRQVFSHFSDSDGDGKI  
SAFELRHYFGSVGEYISHEAAQEAINEVDTDADGSLGFEDFVGLMTRRDLYGDGEVDGD  
GELKTAFEMFEVEKSGGCITP  
KGLQKMLVKLGESRTYGECEAMIKFYDIDGNGILDFHEFRQMMTV

>AtCML42|AT4G20780.1

MESNNNEKKKVARQSSSFRLRSPSLNALRLQRIFDLFDKNGDGFITVEELSQUALTRLGLNA  
DLSDLKSTVESYIQPGNTG  
LNFDDFSSLHKTLDDSFSGGACGGGENEDDPSSAAENESDLAEAFKVFDENGDGFISARE  
LQTVLKKLGLPEGGEMERVE  
KMIVSVDRNQDGRVDFFEFKNMMRTTVVIPSS

>AtCML43|AT5G44460.1

MEINNEKKKLSRQSSSFRLRSPSLNALRLHRVFDLFDKNNDGFIITVEELSQUALSRLGLDAD  
FSDLKSTVDSFIKPKDTGL  
RFDDFAALHKTLDSEFFGGEGSCCDGSPESDLEEFNVFDEDGDGFISAVELQKVLKKLGL  
PEAGEIEQVEKMIVSVDSN  
HDGRVDFFEFKNMMQTVVVPS

>AtCML44|AT1G21550.1

MDCSFITNDLRRMFKTLDKNQDGLVTLDELLWILDKLGWAEHTPDELELIVGKQSLDLD  
EFLRFYYDAVLDSKGSKKNI  
DVVADNDEAIARAFNVFDVNGDGYISAEELRDVLERLGFEEEAKEAWDCGRMIRVHDKNL  
DGFVDFEEFKNMILHV

>AtCML45|AT3G29000.1

MESKSSSSSLPLFALFNFFLISFCRWVSSTRIFLSRFVPLLQHHQRFVDKKNNDQQETLTK  
QEDDDDDDDDDDDDDDDDDDD  
IDISREEAEMVMRSLGLFYNDQQLQEYSAKEVSSLFEEKEASLEEVKQAFDVFDENKDG  
FIDAIELQRVLTILGFKQGS  
YLDNCLVMIRSLDGNKDGKIDFNEFVKFMETSFY

>AtCML46|AT5G39670.1

MTENQLYSFITMKSSLSKCKQSSSLSFPLFGLINFFLIGFFRWVSFAQLFFSRFWPLVQHQQC  
VSEKSKDLEFQTSIKH  
EEYRDDDDDDGLCREDVGMVMKSLGLSTDQENEGLOKQYSSKEVSNLFEEKEPSLEEVKQ  
AFDVFDENRDGFIDPIDLQRV  
LTILGLKQGSNLENCRRMIRSFDGSKDGRIDFYGFVKFMENNFC

>AtCML47|AT3G47480.1

MEDSSLLSPISLLTIVIFLFILNLMMIQDFSSSFPRFHLFFSNAYILFTSIRNNKQNTLPIIK  
KVVPVNRADIKTSV

EEVKAIIDDSEALYECLIEEGEEYLLLEKNEMMGKEIVKEAFRLFDENQDGFIDENELKHVL  
SLLGYDECTKMECRKMVKV  
YDENRDGKIDFYEFVKLIEKSFS  
>AtCML48|AT2G27480.1  
MSYSNAYAPSAPELPESFVQQQHDGESRYTYAYPSYQPTQQFSSYSGMFSPETHPEIVRSFE  
SADRNRSGFLEESELRQA  
LSLSGYDGISNRTIRLLLLFIYKIPVDSLRLGPKEYVELWNCLAQWRAIFNRYDRDRSGKM  
NSTQLRDAFYNLGCVLPTS  
VHQLIVSQFDDGTGKTVDLCFDSFLECGMIVKGLTEKFRENDPGYTGYATLSYDVFMLMV  
IPFIATYD  
>AtCML49|AT3G10300.3  
MSGYPPSSQGYGYGGNPPPPQPPYGSTGNNPPPYGSSGSNPPPPYGSSASSPYAVPYGAQP  
APYGAPPSAPYASLPGDHN  
KPHKEKPHGASYGSPSPGGYGAHPSSGSPDYGGYGGAPQQSGHGGGYGGAPQQSGHGG  
GYGAPPPQASYGSPFASLVPSA  
FPPGTDPNIVACFQAADRDNBSGFIDDKELQGALSSYNQSFISRTVHLLMYLFTNSNVRKIGP  
KEFTSLFFSLQNWRSIFE  
RFDKDRSGRIDTNELRDALMSLGFSVSPVLDLLVSKFDKSGGRNRAIEYDNFIECCLTVK  
GLTEKFKEKDTALSGSAIF  
NYENFMLTVLPFLVA  
>AtCML50|AT5G04170.1  
MSGYPPTSQGYGYGYGGGNQPPPPQPPYSSGGNPPPYGSSTSSPYAVPYGASKPQSSSSS  
APTYGSSSYGAPPPSAPYA  
PSPGDYNKPPKEKPYGGGYGAPPPSGSSDYGSYGAGPRPSQPSGHGGGYGATPPHGVSDY  
GSYGGAPPRPASSGHGGGYG  
GYPPQASYGSPFASLIPSGFAPGTDPNIVACFQAADQDGS GFIDDKELQGALSSYQQRFSM  
RTVHLLMYLFTNSNAMKIG  
PKEFTALFYSLQNWRSIFERSDKDRSGRIDVNELRDALLSLGFSVSPVLDLLVSKFDKSG  
GKNRAIEYDNFIECCLTVK  
GLTEKFKEKDTAYSGSATFNYESFMLTVLPFLIA
