# Supplementary material for: Genome-Wide Identification and Expression Analysis of CsCaM/CML Gene Family in Response to Low-Temperature and Salt Stresses in Chrysanthemum seticuspe
Source: MDPI journal article supplement (doi:10.3390/plants11131760), 2022-07-01
Supplement: s1 [file s1]

>CsCML1

TAGTGGATAACCGATCAAACCGAGAAACCGACCAAAAACCGAAACCAAGAAAAACCA  
ACGATTTTCGGTTATGGTTTTTAA  
AAAACCGAACATTTCGATTTTCGGTTTCGATTTTATGTATAAAACCGAACTAAACCGAAC  
CATGCTCACCCCTAATGGAAA  
GTTACAGTATCCAATATAAAATTCAACTCAATATATAACGTGGTAATAAGACTAAAAAGT  
CCTTATTGGAAAGTGATATG  
ATAGGTTGTCACACACCACAAATCTATTATTTTATTTAAATAAAATAATGACAGTTGAA  
GGATATTTTAATGAAAATAA  
AATGTACAGAAATCTCGTCCAGCTCAATCGTATAACTGTAACCTTTTCTGTCTCGTACTT  
TAAACTTTTATACCAGAAAAA  
AAAGTCTACAAGGCCGATTAATCACCGATTAGGTGCTACTGGGCCACCGACCTTGCCG  
ATTTTTGTAAACCGTTCAAACA  
AATCGGTCAACCAGGGTCAACGGCGGTTAACGATGGTCAAACCTTGCCAAAAACTTATA  
AATCTTGTTGGAATACCCTAA  
ACTCACTGTAAATTAGTTTTAGTTACTTATAGTCACTATTTATATGTATTACAAGATGTTTT  
TCAAATAAAATCTTTCTG  
GAAATACCAAACTCGCCGCAAATACCCAAAGCTTACAAGAAATGCCAATATGATTTAT  
CACCAATTCGCTATTTTTTGCA  
ACCCTGAACAAATGTAATCACTTATAGTCGTTGTTTATATCTATTACAAGATGTTTTAAG  
GAAAATCTTTCAGGGAATA  
CCCAAAAGTCGACGGAAATACCCAAAACCTCGCCAAAATGTCAATCCGATTAATCACC  
GATTAATCTCGCCTAGACCGAT  
TACAAGCTACAGGGGGTCGACCGCCTCACTACCGATTTCGTGATTTTTTGCAACCTTGCTT  
TATACAACCTCATTTTTTTTTT  
CCTACACATACAATCTTTAAATTTAACCTAGTGCTGTGTGTAATCGCAAACGTTCGTTAC  
ACAAACAAGCCGTAGATTTA  
ACATAGGGATTGTTTCTGTAACCACAAGTAACGAGACTACGAGAGGAGCGTATTTTCG  
CAAATTTAAAGACGTTTTTGAA  
AACATACGTTAACCGAAAGGACTTTTGTAATCAAGAGTAAACGATAAAAATAGTCTTTG  
CAATTTTTCAAAGACTATTT  
TTCTAATCGTAAGTCTACCACACACAGGGTCCATTTTTGCTAGATGTTCTTTATTTGACA  
TATATTTATATTTAAAATTA  
AAATTAACATGATAGTTTTTTTTTTTTTTTTTTTTTTTTTTTTTTTTTTAATCTGGGT  
TTCGATTTCGATATTACGA  
GCCAACTACCCTTTTGGATAGCCCGAAGCACAAGTGAACCTCCGTAGCCAATGAAAGA  
TTAATTTTTGATACGCGCCAAT  
TTGGAACTACTGATAAGCTTCAGTGGAACCACTGATAAGCCAAAAGTTAGTTGTCG  
AAAGGTTGGGCTAACTCTGAAA  
CCAATTGATACGAACCTATCCCATACAAGGCTCGTATCGATGTTTCATAAGTCCAAATGTA  
AAACTCACTCAAAAAGCTAG  
CTTGATGAGGAGGGGACACTTAGACATTATAAACCACCGCCCAATCCCATACTTGGGCG  
ATGTGGGATCGTAACAATTTT  
CTCCGTAGAGTTCGAACCCAATACCTCTAAACATTAATAATGATAGGTTGTCACAACACA

AGTCACAACCTTACAATATCAT  
ATACATATTTATTTAATATTATTTCTAGAATAAAATAATGACATTATTTTAGAAGGACAATA  
TATATGAGTAACTCAAAT  
TGATGTTTTTAATGAAAACAAACATCTGGTTCCTGAGTTCCTGTCTGACTACAAAACAA  
AAATGCTTCTTCTTATAACAA  
GACTCTTTCTAACAATTTAGTATTCTTTAGTAAAAAAAAAAAAAAAAAAAAAGAGCTC  
AAAAACATTCTATCTTGCATGC  
>CsCML2  
GCCTTTCCCTTTTTATTAAAGAGAATTGATTTGCACATTTAAGGTTTTTGTTAAGATTTA  
AGATCATTTAAGGAGAAAAA  
CTTTTTTATATACTAAGGGATCAATCTTCACCTTCTATTTTTATTAGATCTAATGGATGTGA  
TTAATCTAAACAATTAAA  
AAAACCTCACTTTTATCATTTTTCTTTAAATATATATATCTTTCAAACCGTTAATCGTCAAG  
CGAAAAAAAAAATACCATT  
ACGACGAGCATTTAATTATCTTTTTATAGATAGGCACTTTGATATACTTTCGACAAAAAA  
ATTTTTTCGTGTTTTTCACG  
TTTTTTTTTAAGTTTTTTTCATTTTTTACGTTACTGAAATTTGCATGAAATATATGATTTA  
ACACTAATTTGAAGATCA  
CATGTGATATTAGTGTTAAATCACATATGATTTGTAATATCATATGTGATACTAGTGTTATT  
ATCATATATGATTTAACA  
CTAGTATCACATATGATATTACATATCATATGTGATTTAACACTAATATCACATGTGATCTT  
CAAATTAGTGTTAAATCA  
CATATAATTTTCATGCAAATTACAGTTTCGAAGAAAAACGAAAAAAGACGAAAAAA  
GTGAAAAAAACGATTTTTTTTT  
TCTTTTTTCGAAAGTATATCAAAGTGACCGTCTATAAAAAGATAATTAAATGCTCGTCGC  
GATGGTGTAATTATTTTTGC  
TTAACGATTAACGGTTTAAGAGATATTTAAATTATAAAAAATAGATGAAATAATAAAATG  
ATTTTATTCTCAACCATTGT  
TTTATTTTTAGATAGATGATGAAGATGAGTACCTTGGTATGTAAGAAAAGTTTGGTATTT  
GATTAAGATACTCTAAATTA  
TGCATAATATAATTATATAATTTTACAACGTGTTTTGTATAATTATACAATGAATGTCCCA  
ATTAAAATAAAAAATATG  
CAAATCCCTTTTACTAAAGAATAAAATAAATTGTTATTAACCTATAACAAATTAACAATAATT  
CTTTAAAAATAAAATCTTT  
GACAGAAACAATTAAGTCAAATATTATCAAAGGTATATTCCTTCAACCCCAAGAAAAG  
CAAATCACAGACACACACACA  
CACACTTTTCAACACACGTGCATGTCACGTGACCCTATTTTCACCATATATAAACCCAA  
ACCGTTTAATACCCTCCTCA  
CATAACCAAACCAAACCCCTCTTTTTTATAACTCTCTGTGTGCTGTATTTTCTTACACAA  
TTTTATAAAATCAAACCCCT  
AATTCCTTCAATCACAATAACATAAACTAAATCCACACACAGTTACACTTTCCTGTGT  
GTTTGTTGACCAGATCTTTGA  
CTTTTAGACCGCTTTTTTAGCTGGTATAAATAATGAACTTGTTTAATTTTAGTTTAATTTG  
ATTAAATTCAGTTGACAGT

TGATAATATCATATTTAGGTAAATTTTTGATTTTTGATGGTTAGTTAGTGATTTATGCATG  
TTTAATTTGTTTGTGTTT  
GGGATTATTGAGTGAAAAATTGATTTAGGGTTTGTTAATTTAGTTAGATCTGTGATAGA  
TTAAGTTTAAAGCCTTTTTT  
TTTGTGTTATAATTAGTTTATGTAGATTGGTTAATTTGAGCACTAATTTAAGTCTAAGTA  
CATTGTGGTTGGAAAACTA  
TGATGAGGTTATTAGGTGTGCGTAACTAGTATGAGTATGTATGTTGTTAATCCTAGAAT  
CCTCGATTTTAGATGAACGG  
CAAAAATTGGAAGTTCGTTTTTATCCTTTTTTACTTTCCTGTGATTCTATAGATGTACGTG  
TTTTCCATGTATCAAATGA  
TTCTATTTAGCTAAGTTGGTAATTATCCGTGTGGTTTATATTTTATATTGGTTAATTGATTA  
GTTTTGTGATTTACCATT  
GTGGCAGTTAAGGTTGAGACATGTTTCGTAGCAGCAATAACGTTGCTGTGCTTTTAGCA  
GTGTAAAGCTCGTGTTGTCTA

>CsCML3

AGAATGTATGCTAGTATGTCAATTTGAACCCAATTTATATATCACTACATCTGTAGCAA  
GATTTTAAATGAGGAGTAC  
AAAAATGTACAAAGACATGGCTAGGAATTTGAATTGAAGATGATATGTTTCGGCTTTAAT  
TGCCAAAGATAACAACCTGCC  
AACTAACTGATTATCTGACGCAAATTTGTAGAAATTCTCTAAGAACTTCTCTCATTGTCA  
TATACGGATATGTCATAAGC  
TAAAAGCTGTTTTTTTAGCAAATTATTCTATGAGTAACTAAGATCATATATTTCTTAATTA  
AGAACTTCCTCTTAATTAT  
CGACGCATTAAAAAAAATGCTAAACAAGTAACGAGTAGATCGAAGACTATAATGCTAA  
TTGATCATGTTACAACCTAAGTA  
ATATACCAATAAATGTCTTGTTTGACAAAAAACGCCGTTTTTCAGCTACACAAATATAA  
ACAATTA AAAACAAATTAATTA  
CGAAACATCACATCTTATTTAGCATGCCCGCTTGCCCTATCCACAAAATATAGAATCGTA  
AAAGGTTAGTGATTACCAAG  
CTCTTAAATAATCTGTAAAGTTTAAACATTTACCCGTTATGTTACATAAATAACCTGGATAA  
GTTCAAAGAAAAAACCTAT  
ACAAAATAACTTGCATTACACTAGTCTTTAACAAAAGGGATTAAGTCGTAGAATAACAA  
TATACTTTTTAAATATACCA  
TTTTGGTACGTGTACTTTTTAAAGTTATAGAATAGTAATGTACTTTAATAAGTGTTTTAAT  
TTGGTACATGACGATGACG  
TGTCATGCTGTAAATGCTGCCACGTGTCAAACCTTTTGGATATGACGCGTCATCGTCCCG  
TACCAAATTA AAACACTTATG  
AAAATACGTTGCTATTCTACAACCTTTATAAAAATACACATCCCAAACGATACATTTTGA  
AAAGCATAGAAGGAACTATT  
ATTTGCGCTTTTTTACTAAAATATAAATAAATAAATTGTAATTATTAAAAATAAAATCTTT  
GACAAAAACAATTAAGTCA  
AATATTATCAAAGGTATATTCCATTCAACCCCAAGAAAAGCAAATCAAAGACACACACA  
CACACTTTTTCAACACACGTG  
CATGTCACGTGACCATATTTTCACCATATATAAACCCAAACCGTTTAATACCCTCCTCAC

ATAACCAAACCCCAACCCCT  
CTTTTTTATAACTCTCTGTGTGCTGTATTTTCTTACACAATTTTATAAAATCAAACCCCTA  
ATTCCTTCAATCACAATAA  
CATAACTAAATCCACACACAGTTACACTTTCCTGTGTGTTTGTGACCAGATCTTTG  
ACTTTTAGACCGCTTTTTTAG  
CTGGTATAATAATCAACTTGTTAATTTTAGTTAATTTGATTAAATTCAGTTGAGAGTT  
GATAATATCATATTTAGGT  
TAATTTTTTGATGGTTAGTTAGTGATTGTGCATGTTAATTTGTTTGTGTTTGGGATTAT  
TGAGTAAAAAATTGATTTG  
GGGTTTGTAAATTTTAGTTAGATCTGTGATAGATTAAAGTTTGAAGCTTTTTTTTTTTTTT  
TTTTTTTTTTTTTTTTTTT  
TTTTTTTTTAATTAATTAGTTTATGTAGATTGGTTAATTTGAGCACTAATTTAAGTCTAAG  
TACATTGTGGTTGGAAAAC  
TATGAGGAGGTTATTTGGTGTGCGTAACTAGTATGAGCATGTATGTTGTTAATCCTAGA  
ATCCTCGATTTTAGATGAAC  
GGCAAATTTGGAAGTTCGTTTTTATTCATTTTAACCCCCCTGTGATTCTATAGCTGTAC  
GTGTTTTCTACGTATCAAAT  
GATTCTAGTTAGCTAAGTTGGTAATTATCCCTGTGGTTTATGTTTTATTAGTTAATTGATT  
AGTTTTGTGGTTTACAATT  
TTGGCAGTTAAGGTTGAGACATGTTTCGTAGCAGCAATAACGTTGCTGTGCTTTTAGCA  
TTGTAAAGCTCGTGTGTCTA

>CsCML4

ATATATCTCTCTATGAGTTGATAGATATCAAAAGTTTTTAGATCTAGATCTAAAACTT  
TTTAGATCGTGATGTTGCT  
ATTGTGGTGATGTTGCAATTGTGGTGGTATCTGTTTTGTGGTGGTATCTGTTGTGGTGGT  
ATCTGTTTTGGTGGTATCTG  
TTTCGTTTAAAGTTTTTAGATCTAAAATTTTTTAGATCTTGAAAAAAATAGAGGTTGGTT  
TAAAAAAATCTGAGGTTGGT  
TTTCTTTGATTATCTAAAAACATTTTAGATCTAAAAACTTGATCTTGAAAAAATTTGTG  
GTAGTATCTGTTGTGGTGGT  
ATCTGTTTTGGTAGTATCTGTTGTGGTGATATCTGTTTCGTTCAACTTTTTAGATCTAACA  
TTTTTTTAGAGCTTGAATC  
TTTTTAATCTCTTGAAAAAAATTAGAGGTTGGTTTAAAAAATGTTGAGGTTGGTTTTCT  
TTGATTATCTAAAAACATTTT  
AGATCTAAAAACTTGATCTTGAAAAAATTTGTGGTGGTATCTGTTTGTGGTGCTATCT  
GTTGTGGTGGTATCTGTTTTG  
GTGGTATCTGTTGTGGTGGTATCTGTTTCGTTCAAGTTTTTAGATCTAAAAATTTTTTAG  
AGCTTGAATCTTTTAATCT  
CTTGAAAAAAATTAGAGGTTGGTTTACAAAAATTTGAGGTTGGTTTTCTTTGATTTTC  
TAAAAACATTTTACATCTAAA  
AACTTGATCTTGAAAAAATTTGTGGTGGTATCTGTTTGTGGTGGTATCTGTTGTGGTG  
GTATCTGTTTTGGTGGTATCT  
GTTGTGGTGGTATCTGTTTCGTTCAAGTTTTTAGATCTAAAAACTTTTTAGATCTAAAAC  
GCGTACACACCACAAGAATG

GAAAGCGTACAAACCACAACAATGGAACACGTATACTACTCTTTTATAAATAAAAAGTTA  
ACTCTTTTATTTATAAAAAGAG  
TATTATAAATAAAGTTTATAAAAATTTGGTGGTATCTGTTTCGTTCAAGTTTTTGTGGTATA  
AAACTTGGTCTCTCATTGT  
TATCTGTTTGGTTATGTTTTGCAGGTTTGGGGTGCCTCAATAGCATGGCCCTTGCAGTTG  
TTTCATTACCATTACTGGAT  
GGTAAAGTGATCATTTTTAGCACTTTGCAACTTTAATGAAAAAACTTGAATGTTTTGG  
CATGGCACGCTTCATTACAGG  
ATGGTAAAGTGATCATTTTAGCTCACTTTGCAACTTTAATGAAAAAACTTGAGCTAAA  
AAAAGGCAATGATGATTTTTT  
TATAAAAAGCTTAAGAGTTTTGGCATGGCAAACTGAATTTGCAGCCAACATGAGCTA  
AAAAGCTAATAATCTGAGCCTA  
TTCGATAAGTTTACCTCTTGTGTGTCAAATGGTGACCTAGACATGGTTGTTTGTGGTG  
CAGTTGTTGCTTTTTTGTGTTGT  
TTGGTGCTATTGGTGTGTTGTGTGTGTAGCTTTCTGTTGGTGCTAATGGTGTGTTGGTGT  
TGTGCTTTCTGCTAGCTTA  
TGAGACTTTGTGTAGTTTGTGTGTGTAGCTTTCTGTTGGTGTGTTGGTGATGTTGCTTTC  
ATGTGGCATTATAAGCCTGT  
GCCTGCTATGCTGGTACCCCTTTGAGAATCTTAGTTACTTTCTTGTGAATGTTTGCAGTT  
TTGGAATCCTACTTACCACA  
TTCATGTGGTTGAACATGTGCCTGCTATGTTGAAAACGTGTAATTTGTGAATATTGTTGA  
ACTTGTGAGGCTTGTGTCCT  
TGTGAAGTTTGAGACTTGTGAGACTTTGTGCAGTTTGAGACTTGTGAGACTTTTGCAG  
TTGTGGACTTGTGAGACTTGTG  
CAGTTCCTGTGAACTAGTGACATTGTGCAGTTCCTGTGAAATTGTNNNNNNNNNNNNNN  
NNNNNNNNNNNNNNNNNNNNNNNN  
NNNNNNNNNNNNNNNNNNNNNNNNNNNNNNNNNNNNNNNNNNNNNNNNNNNNNNNN  
NNNNNNNNNNNNAATGATCTTGTACAC

>CsCML5

CCTAATTTATTAAAACTAGTGCTAGTGAATCAAAATTTAAAATTTTAACTTGATTGAA  
TCAAAATTAAAGATGATCC  
AGTTGGTTTCATTTTAGGTGACAAAGAAATTGGTTTGAGTGCAAACCTTAAGTTCTCGA  
GTTTGTAGTCTTGTGCGACAAAGC  
AACCAGTAGTCATTTAACAATTATAAATGTTATGTTCAAGTTATAAATTATGCATTTAACG  
AGGGTTGTACTATATAAAC  
CCTCTCTATGGGGTTACATCCATAGGGAATATTCCTTTTGTCTCCTTGTTTTTTCAGTATA  
ACGCAGTTTTTTGTCAGTT  
TCAGTTCGTAATTTCTGACAGTTTTTAAGCGTTTGGCTTATTAACTTTATATTTACAGTTC  
CGCATTTTCAGGTTTATAG  
CTTTTGTATATAAACAAAATTATAAAAATAAAAAAAAAAATAAAAAACAAAAAACTA  
AGGGGGGTCAATCTAAAAAACT  
AGGTACCGTCCCAATAACCCAACCCTTTAATGATTCTACAACATTTTGTGGTTATTTTCT  
TAATAAAATCACTTAATACT  
TCTTAGTAACTTATAAATCTGAACATTAGAAGCCTTTAACCATTAAGGGTATTTGTTGC

TTTTTCTTTTCGTTTCGACA  
CATTAAGATGATTTAACCCTTTGCTTAACAAGACTTTGAAGATGATCTTATTACTTCTTA  
ATGATATATTAAGTAGTTTT  
TTTCCGTGTTATAATCATTTAGACTTTTAAAAAACAACAATATCATTTGATTCAGATTC  
AAAATTTTCCGCCACAGATT  
TACATTCAGATGTACGAATCAGATTCATACTCATAGCCACTTAACAAACAGCACCACAT  
ATCTTAAAAGGGAAATGATT  
GCACACATTATGTTTTAATTTGCCCACTCATTAGTACAACCTGTAAAGCAGTGTTATAC  
ACAGTACAACAGTTTAATAC  
ATATTCTTGAGTGTCCCTATCAAATAATAAATTGTTCAAATCATTTCCCATATTAAAATAT  
CCGATATATTTTTTTCCTC  
ATTATGGAGTCACACATCCCAAGGTTTTCAAAATCGGGATCCTACTCAGGATCGTTTTT  
TGTTCTTGCAAGATCAGAATC  
GTAATATCGGATCGGGATACTAAGATCTTACTATAATGTTATTTTCTTAATAATCTGTGTA  
ATATTACTCAAATCTACAA  
ATGTTTATATTCCATAAACATAAACTATATGAATGTTTCGAAGAAATGTTTTCTTATGTA  
TGAATATTGAATGTTTAAG  
AATATTCACATATTGTTTTTTAAATTCTATAAAAATATAATCAACAACCTTTGTAGTGTTTT  
AATTTGCAGTTCGAGAAAA  
GTAAGATTGAATCGGTTATATCTTAAGATTTTATAGTTAAGATCGGGATTCGATAGGATCT  
TAAGATTGTTAAGATTTTA  
TTTAAGATTTGAATCATTTTTTGCTTTATAATATCATAAAATCGTAAAATACTAAGATTATTA  
TCGGGATCTCATCAGCTA  
GGACGCATTCATTTAAGCACACGCATTCAACGTATAATACTACCCAATTGGATTCTCCGT  
ATCCTAGAAATAATGATTTT  
TGCACAAATTTTAAGAGAATTACTCCCCTCACCCTCACCACATGACCCACCTCACCCA  
ACGGCACTTTCTTTGCATTAT  
AAAACCTACCACACCCCTATTCATTTCCCAATTCATCTTTGCACTCACCTCAAAAAA  
CACACATAAAAAACACTTGTG  
TACTTTTTTGCAACATCTACAACAATGCCTAGCATCATTTTAAGAATATGTCATTTCTACA  
ACATCATATACTCAATCTT  
CCTATACTTACTTCAAAAAAACTCAAACATTATTTCTCTAAATCATATAACCAAATCCA  
ACAACCAATAAACGACGCGA  
AAAGTACAATCTCTCACCCACTAGCACAAACCAGCTCGTTCTGGTCGCATGGACCAGAA  
CGAGCTCATGCGCATTTTCCAA

>CsCaM1

CATAATAAGTTATAGTCGTTTAAGAGCCGAGTTCGTGAAGTGGGTTCAAATTTTGAAAT  
GAAAAAACAAAACCTTATAAGC  
CCAAAATAATAGGTTGACCTTTGGTGAAAAGGTAGCCCATCATTTGGAATTTGAAGAG  
GGCCTTCGTACTAAATAATCGA  
ATTTGTATTGTTCTCGTCGTGAACAAAAGTCAGTCTAACGATGTGTTTGACGACTAGCT  
TATAAAAATATTATCTTTTTA  
AAAACTTTTTAAAAGTTATGAGTTTTTCATAAGTTCAAGCTAATATAAATAAGTTTAACAA  
AATGCTTTTTTTTTTTTTAT

CAGTCAAATTATTTAAATATATTTTAAAATATCATAAATGAATATACAAAAATTATAATATA  
TGTGAACTTCATTTGATT  
TATTTTTGTGTCATATTATAATAATAAGTTGTAACCTCACGTCTAACTCGCCAAACACATTT  
GTGAAAATTAAAACTACAA  
CTTACTGTTTATTACGCTCTAGTTTCAACTAGTTTTTGAATACACACCTTGAATGTTGTTT  
GAAATTTTATTTCAAAAGA  
TATTTTGGCTAGTTGATGTGTTTAAATGTAAAAAATTAGCATTTGATAAACTTATTCGAA  
AAATAACCATCGTCATTTTT  
GTAAAGACATAATCGGTTTTGAAAAATTTAGGTTAGTGTTACATTCAGATAATCGCTTTT  
GGAAAACACAATCCTAAACA  
CCCTTTAATAACATTTTTCTAACAGACTATAAGCTCAATAGTTCATCAACAAACATGCAA  
CCATGCATATACTAGTTCAT  
CACGAAAAACATGCAAATACGTGCTCTCGTATATTGAACTTAGAACCACCTTTATGGATA  
CAACACCATCGTGTTGATAAC  
TAGCATGGTACTCAAGCAAAACATTGACAAAAGATAAATCATGACGAACTTTTAACGG  
TACACAACGGGTTTTTCGTTGAC  
AGTTATAATGGTTATGATGTAAAAAGAGTAGAAAAGTGGCCTGACAGAATATTGATG  
GGTGTTTATAACCTGAATACT  
GATAAAATTAACTTTTTCCACCGACATTTGTTAGAACTACCATCCGATCCTACCTTTGAA  
TATCATCGCAACGTAACACG  
ATTACTCCATGGTTGCCATGAAATTTATATTGAATAACATCACTAAATGGGTAAATAGAA  
AAGTATTCCTACTCTGGTTA  
CTCAGAAAATCAAGCAATTTTTGAACATGATATACACGACTTAACTAATATTTTCTTAAC  
GAGGTTTGACATGATATCTT  
TTAAGACTAAATGTAACGGGGACCAAACCGTTTCGATTGGTCCAAATTTGTTTGGTATC  
CTTACTACACAAACCAAAATG  
CACGCGTCCCCCCCCCTACCCCATATTTTGCATTGGTTTGGTCCGTTGTGGACCAA  
ATGAAATGGTTTGGTTTGTGT  
GTATTTAAGTTTGTGAGGCATGTTTTTGGTTGTGAGTGTGGTCTTTTTACTATGAGTATT  
TTGTCTTTTTAGTCTTGAAA  
AAAGAAAATGAAGTAACGCTGATGTGACAGTGTTGGGTTTGGCGTTCGTGTGGTCTTA  
TACTATCAAGACTTTGAGAAC  
ACTAATCTGAGGATAATGATCATCTCATGTTCAATTTGAATATGAGAGGTAATGCTATGCT  
TGTTGTGATAGTATATTGTC  
ATTATTGTAAAATATTTATTTTATTTTATTTTAGTTCAAATGTACAATCACATTAAGCATAATATT  
GCTTCTCCTAATCTGAAC  
ACCTCAATTTACAGAACCTTGTAACATCTCCAAGTGAAAAACATTACAAACCCAAAGG  
TCCATATCACCCAAAACACAAA  
ACCAAAAGGAGAAAAAAGTAAAAACACAGCACGATGGGAGGAGGAAGCATCTCAAA  
TGACATGATATATGGAGGACCACT  
CTTTTTATATATATTCCCACACCCACCCCTCTCATCATCATTTTCTTCATTCATTTTACT  
TTTTATAAAAAACAACA  
>CsCML6  
AGGAGGTAACCATTCGGTTTTTGCGCATTTGTAGGACCTATGGGATGATTTTATTATTAA

TTACTTCATCCGTCCCATT  
TATTGTCCATTTTGACTTTGATCACTCTTTCTTATTCAACTTTGACCATTAATATATTTATT  
TGTGTTATATAATACTTG  
ATGAAAATTATACCAATGAAAATACATTTAAAACCCAATACATTCATATATTTTTCATCAA  
GTATTGTATAACACAAACA  
AAAATAATTATGGTAAAAGTTGAAGAAGAAAGACTAAAAAAGTCAATAGGAGACAATA  
ATTTTGGGACGGAGTTAGTATT  
TGATTTGTGAGTATGTATGAGTTATTTTGTGAGGTATGTTTGTCTAAAAGTGAGTATTTT  
AATGAAAGTTGTCTGGAGTGG  
TGACAATAAGAGTGAAAAGTGTGGGAGGTGAATAGATAGAGAAAGCTGAGATGGCG  
TTAAGGTGAGTGGTGAAGTGGTA  
CAACCACTAAGAGTAGTCTTACTATATTTTACTATTCAAATATTATTTCTGCTTACTAA  
GAGCATGCCCAACAATAAC  
GGCATAACGCCGTTATATAGCTAATAACGCCGTTAACGGGCGTTATGTCGTTGGAACCA  
TGGCGTTATTTAGGCGTTAGT  
CCCTCAATATTATGAAAGCAACGCGGTTAAAAAAAAAAATCATTTACCCCCCTAAAC  
CATTTCAAATAAATTTTCACT  
TACCCCCCTCAACCTATTCAAATTTCAAATTTAAATTATACTGGTCAATTCTAGGCGGGA  
TAAATTTCAAATTTCAAATTTG  
AAATTTAAAAATCGAATATGAGCGGAATTTATTCAAACCTCAAATCAACTATGCCTATAT  
ATACAACCTCTACCAGAGTTG  
TTTAGAACACACAACACACACAAGTTACACACACAACCTCAGACACACAAAAAATGTC  
TCGCAAAGATTTTCTCAGCAAT  
TTCCAAGTCCAGAAAAGCTGCCGGAACAAGCTTTTCAGCTTCACCACAGTTTCCTCC  
AACTAGCTTTTCAGCTTCACCA  
CAGTTTCCTCCAACCTAGCTTTCCACCTGAACTTGAAGTTTACTCAACACCACCGGAAA  
ATGTCTTCCCGGTGGGTTTTGA  
AAATATCCCATACCTCCCAATTGTTTCAACTCCACCTGTGAACAGTCCACAGGTGGATC  
TTCAAATTCACCCAGCGGGT  
TAAGTGAGGCTTCCCTCCGTCAACTAGAACAAAGATATTGAAAACGGTAGGGAGATTAT  
GGAAGAGCATGCACGTGAGGAA  
GCTGCTCGTCGTGAGCAAGAAGCACGGGAAGCTCGGTATCTTGAAGACAACCTACTTCG  
ACATAATGGAGCGTCGGCTCTT  
TAATGGGGAGTTTGATTCCCCTTCAAGTTCTGAGGGTTGGGTCTCAGATGATTCATTTT  
TTTAAGTTTTAGTAGTTTTAT  
TTTCATCAGTATGCGTTGTATCTTTAATTTTAAATGTAATTCGTGTTTAAATGTTAATGTAC  
TTTGTGTTTTAATGTAA  
ATGTGATATGTTTTTAAATAAATGAAGTGTTTGTTTAGTTTAGGGGTTGAAATTGAAAA  
TATGAAATGTTATTGATGTT  
ATTGGTATGTTATTGTTATGGGTGTTTTTGTAGGATGTTAAGGTGAAATGTTAAAGCTGA  
TGTGGAGCTGACGTGGACGG  
TGTTATTTTATAACTTGAGTTATTGTTGTGATTGCTCTAAAGTCTCACTTGATTGGCTAAA  
TATTAATATGAAAAAATAT  
TTTGAGACAACCCAAAATAACGATCTAAACAAATAAATTGGGAAGGAGAATAGATATTT



GTGGGTCAACAAAGAACAACA  
ACTACATCATAACACGTTTCATAATTATTCAATCATATATACGGAGTATATTCTAACAAACA  
CGGGAGTCGTCCGTCGTCG  
ACCCCTATAAATCCATCAACTTCATTTCGCAACAAGGTCATAGACTCATGGTTATTCAATC  
ATATATCTAAACTATATATA  
>CsCML7  
GCTCGTGAGTGTGTGACTGTGTTTGAGCACAATTTGTTAGAATAGCCCAAACGGTCAA  
AATTTATAAGGTCACCAAACCTG  
GTCAAATAGATTTTATCAAAAGCTGAAAACACGTCAAATGGGTAAAATATGCCAAACAT  
ACTCAGTGCGCACAACCTCTG  
AATTCTTATAAAGAAGCTTAGCTTCTATAAACCATATGTAATACATCAATTAGTTACAACAT  
TCTTAAACCAGAAAAAAA  
AAAAAAAAAAAAAAAAAAAAAAAAATTGGGTCAACCCAACCAAAACAAATGAGGT  
TTTCCCTGTTGAGGTTACCCGGGG  
AGGTCGAGCCTTCTTGACTCAGATGTACGCGGCCTCACCGAGTTAATCCCATGACCGTT  
TCCGGCCCTTCTCTGGCCACC  
CTCAAATGTACACACCTAGCATAGTTTGAACCCTTGACTTGTGAGGAGACCAAGGCCT  
TACCACTAGGCCATTTGGTGGT  
GGTTTGGGTCAACCCAACCTATTCTGACAAAATTCAGTGGCCACATTTATATCACACCA  
ACACTTGGCACATGTTTCAGG  
TTCAACAACGTCTCCAACTTCGGATCGAATCACAAGGAAAGTATCTTCAATCAATCCTG  
GAAAAAGCGTGCAAAGCTCTA  
AACGATCAAGCAATAGCAACTGCTGGATTAGATGCGGCTAGAGAAGAGTTATCTGATCT  
TGCAATCAAGGTAGCCAATGA  
GTGTCCTTCATCTGTCACCCCGACCTCTTCACTCACCCACGTTTCCGCCCACCCTGAAA  
ACGAACATGCTCCAAATGTTG  
ACAGTTGCTTGAGTTCTCAGGCTGATGCTGCAAAGAAGAGACAAAGGGCTATGTTTAT  
GCAGTCGGAGTGGAGGGGCGTC  
TAACTTTAGATAAGCTATTGGTCTATTTTGTTTTCATCCCGATGACATTTTCCTCGGCCTC  
TAGCCTAATGCAGGGGGAA  
GCGGGTTTTATTAAAGTAGGGATTATCTTTAATTAGTCCGTATCTTGGCATGTATGGCTGAT  
TTGTATAGTCGGCAGCAGT  
TGGTAGGAACACAAGAAAGACTGGTTATTAGTTCTTTGGTTATGTTTCATTCGAAGTTTA  
GTTCTACATCTGTGATGGTTA  
AACCTGGTCCGGGACTTGTATTAGTCATGGACAAGTCGCACAGTCAGAACCCTTTTCT  
CTTAACCGTACGCAACCTTTTCG  
TCTCATGAATCATAATTTGTGAGTTTTAGTTACGTGCGTTTCACGTCGTTCAAATAGTAA  
TAACATTAATTCCAAAATAA  
CACCTTTTACATATACAAATATCAAGTTTCGAGCTCTTTAGGGTCAACAAGAGTTATTTA  
GCTTCTCAAATAAGTCCTTA  
TCAGCTGAAACTCGACTCATTGTATATATCTATTCCGTTGTCTTGGATTCCAGCTTGATCT  
CAACCTCAATAAAATATGA  
GAAATGATATTTCTTCGTGCTTAACATTCCCACGTATCCTCCTACTCACAAGATCTTGAC  
ATGTGGAAAACTAACGGTT

TAGATGAAGATAGTAATTGAAAAAGTGTTATATTTTTGTGTGGGTAGAAGGATGAGTAG  
GAAGAAAACGTAACCGGGCAG  
CTCCACTCGTTGCAAATTACGATCCTAGTTATCTAGGCGTACGTTTTTCAACTTTTTTT  
AACGTGTTTGGAGTTGCATT  
TGCAAACTGCGCGTTCTACTTTTTCAAAGTGTGTTTCTCTCTATAACAACACAAAGA  
GCCATATTATAACAACATTT  
AGCAATTATTTGCGTTGTACAAAAGCAATAACGAAATAATCACTCCTTAAAGTCAATC  
CCAAACACTAGAAAAAGCGAA  
AAAAAGAGGGAACTGTTTCATTTAATTTAACTGCAGTCTCCATCAGAACCTGATTCTT  
TTCCACAATGCTTTCCATTTA  
TCTTCTTTTTCAATCATTCTCTACCCATTATTCCTGCACCCTTATAACAACATTGCCTCGA  
TCAAACAATCCAATCCTCA  
>CsCaM2  
AACACGCATTTCTCGTTAGGGTATTTAATAAGATGGCCAAGTATTTAGAATATTTATTTTA  
TTTCCTCTTCCACTGATAA  
GAATTCATTTCCAGTTCAGTTTCTATTTAAATAGAAACACAACATTCCATTGCTCATT  
CAATTGGTGGGGAAACCAAG  
AAAGGAAGAAACAGATTAAAAAAAAGTCAAAAGAGTAAATTACACCGTTCGTCCT  
TATGGTGTTGAAATGACGAATTT  
ACCCTCATGTGCAAGTCACATGAGGGGAGTTTAACGGTCAAACCTAACGTCGTTTGGT  
CAAAGGACGAACCATGCATAAC  
GTTTCACACTTAAGGACGTACGGTGCAATTTTTTGGGTCAAAGGACTAAACCCTGCGG  
TCAACGCAAACCACAAGGACGA  
ACGGTGTAATTTACTCTTAATACTATTATACACCATCATCGTTAGACGTGAATAATCGTCT  
AATAGTATAAACAATTTAT  
CTATGTGTTTCGCATAAACTATCATTAAGTCATATTTTTTAATCTTCAAATAGATAACTATC  
ATTATTTACAAAAGGAA  
AAGTTCTCTATCAACTTGCTACTTAAAACCTTTACGTATTAAAAGTTTTCAAGTAGTTTT  
TAACTTTTTAGTTAACAACA  
ATTATGACGAATTCCTTCAATGTCGGTGTCAGCTAAAAAGATGTCGAGAAATTAATACG  
TCATGGTTTTAATAAATAGAA  
AAACATCCCTTGATTATGATTACTATCATTTCAAATATTCACCGAATAAAGTTAAAG  
GGTGCCCGCGGGTTTCTAGA  
AACATCATGAATTTTTTTAAGATAGTGTTAATTTTTGATAAAAAAATCGATTTTTTTTTTA  
AATGCATATAGTTTATCAA  
AATGTGTTTCTAGCGTTAATTAGTTAGTATTTAAAAAATAATTTATACACCAGTCAT  
ATTATATTCTGTTTCCGTCC  
CTTACTATGATTTTTTCCATGTTTAATAAATACCTGTCATTTCAGGTTTTGAGTATATATAAA  
ATTAATTATGAAAATAAT  
TATTATTAACTTTTTAGTAAACTAGACGAGTACCCGTATATAGTAACGAGATTTTATG  
GCGGCAAATAGATATATTTT  
GGTTACACAATACACTTAACCAAAATATAATCGTAACTATATGCCACTTTTAAATGTGCG  
TTGCTATGCACGTGTACGCG  
TCTAATCTTTGTACCACAAACGTCGAATTTGCAGAGAGTTTTCTTTTTATCTTTTTTTT

CAACAAACGTTTTCTTATAA  
ATACACAAATTATATAAGGATGTCATCATATATTAGTTGACAAAATATTATTTTTTGCCAC  
TTCTATGAATTTAGATAAT  
GACATTTACAAAGAGGTGGACGGCAAATAGGCAACAAATTGCGCCGCTAGTTCTTTTT  
GAATAACAAAACCAATCTTTTT  
GAAAAGTACATCTATTGATCTAGGTGTTATAATATTATTATGCATAACCCGTTGAACTCTG  
TTGTGGAATTTCACTACCT  
AGGTGCAAGGAAACCAAAAAGTATCAAATGTGAAAGGGATAAAAATATGTTGATTTCAA  
TGCGCGTTTTGTCGTATTTTGC  
CACTTTGTACAAAGCGGCTTTCAAAGCAGCCTACTGTAAAACCTCGACTGCTTAAACC  
CACGAAAGAAGAACTAAACTT  
GGTAGAATACAATTGTCTTAAGCTTTACATGTATTCTCAATTTAACTTTTATATTCTTAAG  
TCAACTTTTATATTTTTGT  
GTGTTTCTTTTAAATCGTGTGTTTTCGTTTTAAGTTTTGTAAGATTGTTAGAATTTTCCA  
AAAATACATCAAAACCTAAT  
AAATAAGTTTTTAAGAAAAATAAATAAACAGTCCGAATTCGCAAACACCCGATCTTCTAT  
ATATGTAGTCACCATCCCAAT  
CCCAAGAAACAAACAAACAAACACACACTATTGAATACAAAGAAACAAAATTTTCATC  
TTGAATTAAGAAAGAAAAACA  
>CsCML8  
TCTTTTGACTTCAAATCCTAAGCCAAAGGGGAATATCAAACGGGCTCTAACTAGTTAAA  
AGGATTTGGTATTAGAGCCGT  
TCTCGAGGATGGGTGGAATGGTTGGCTGCCCAAGAACCCCAATTTTTAGAGCCATACA  
ATTTATGTTTCGATGTATAATAC  
TATAATGTATAAGTGCATTTAAATTTTAAATAAATATGAATAAAATAAAGACATTTTCATA  
AGGATCTTTGAAAAATTTG  
TGTGAGTGATCTTCATTGTATCTTTGAAAATCAATATATTTTTCATTTAACCTTCACTTTG  
AGGCTTTATTATCAATTTT  
CGCCCAAGGTTTCAATAACTTAAAAATGGCTTTATTATCAATTTTCGCCCAAGGCTCCA  
ATAACCTAAAAATGGCTTTAT  
TATCAATTTTCGTCCAGGACTCCAATAACCCAAAAATGGCTCTGTCCAATATGGGCGTG  
TTATAAGGCATATTTTGTGTC  
TACAATTAAACGCATCGTACCTGTACTAGAGTCGACGTTATTCGTTGTTATATGTTAGAC  
ACCATCAACAAGGTTTTTGT  
ATTTTLAGTGTTTTTTTCTTATAAATTATTTCTTATCTTTTATGTTATGATTTGTGTTTGT  
TTAATGTGTGTCGGTTG  
CATGTGGCTAAGATGTGTATTTATGTTTTCTATTTTCTTTATTTCTTTATAAGATTATTAGT  
CTTGATTAGTCTTTTAGC  
TTGTTAGTTTTTAGCGGGTGTTTTCTTATATTATTAATCTCTGGGTGGGTATTTTTTTCTTA  
AGTTGTTAGTCTTTGTTT  
TTGTTTTACTATTTTAGTTAGGGGTGTGCATTGTTTGGGTAATAACTGAATAAACCAAAA  
ATCGAAACCGAACCAAACCG  
TACCAAGAAGGCCACTTCCAACTTCGTTGATAAGAGCTTGACGAACCACAATTAGAG  
ATTAATTTTGTCTCAATAAAA

AAAACAGTCTTATGATAGTCAACTATGATCATGTTTGGCAAAAAGCTTTTGAAAGTGTT  
TAGGAGCGACAAGCGGTAAAT  
ATTTGTTTGTGTTGACAACATCTCAATAAGCGTTTGAAACATGATCAACTGTTCCAATCTT  
AAATGCTTTCTGAAGAAGCT  
GCAAGTGATAAGCGGTAAGCATTGTTTACACTTTATTATTTCAATTACTGCACGTTACC  
AAACACGTTTTTTTAAACAAA  
CAACTACTGTTTATTGCTAATTATTGCTGCTTACTACAAACTGCTACTGTTATTGCTACGT  
GTCATCAAACGTAAATACA  
CACGATAAAGACTTTTTAACTTTTTGAGTATACGTTATACACAAAAAATAATAAATTCAA  
ACACATAATATTTTCAATAC  
TTGCAAGTAGTTGCAACACCTTTACCATTGCAAAGAAACATCGCCCTTATTTCTTTGTA  
CATTAATTACCAAAAAGTTAA  
GTAGAAAAAACGAACCTTCAAAGTAAGTGGTTAACTTCCAAACAAAAAATAATGCTTA  
ACCCCGTGATCACGAAATCGA  
TATACACCTTCAACGAAGATTCCAATAAAACAAAAAATACCTTTTTTTTCCAAACTCAT  
AATCAACTAATCCAAAACAAT  
AAACAACTTTCATGCATAACGTACAAGTCATCGCAGCATGACTACTCTAACTTATAAC  
CTTTTTTTCTTGGAGTCAAGG  
TCGGCTGCTTAAATCAAGTATTTAAGTAAGAATTCTTCTTCCTACTTTCCTTAAAGAATT  
TTTTTGCCGCAAACTTTTGA  
CAATTGACCATATCTTTCGTACACACTTTGAACACAAATCTTATATAAACTCGATCGATC  
ACAAATCTATCACAACACAT  
ATTCCTATTTTAAACTCATAAACTTTCTTAGCAAGTAATCTAACACGTTCTTTTTTTCAT  
ATATATACCATAACAATAT  
TCTTAACCATGAGCTTCATGATACTCGAATTGATCCAATACTTTTTCTTGCATATAATTCT  
CAACAGGGTAACCCTAATC  
>CsCML9  
TGATGATATTTATCTCTGGTTTACTTCATAATGACAAGGAAGCTGCCATTGCTGCCATGA  
ATATTCTGCTACAAGCAACC  
TCCTTTATCTACATATTTGCATCATCTATAAGCATGGGTGTTTCGGCTCGTGTTGGACAC  
GAGTTAGGGGCCAACATGCC  
AAAGCAAGCTGAATTTGCATCATATGTGGCCTTATTATGTGCTGTTGTGACTAGCCTTAT  
CGCGGTGGCCTTAGCCATTG  
TTAGTAGAGACCTTTGGGGGTCACTGTTACCTCAGATTTGAAGATCGATTCACTAATA  
TCGGCAGCCATGCTTGTATTG  
GGGGTGTGTGAGCTCGGAAACTGTTCTCAAACGTGCATCTCTGGGGTGATAAGAGGTT  
GCGCTAGACCAAGGTTTCGTTGC  
ATGGGTAAACGCCGGCTCATTTTATCTTATTGGGCTTCCCATGGCGTTGCTTTTGGGCTT  
TCATTTTGACATGGGCTTTG  
TGGGCTTCTGGAAAGGCTTATTTCGTGGCTCAGATGGCCTGTTTGCTATGTATGGGTGTG  
TCATTGTGGAAGATAGATTGG  
GAGAAAGAGGCTAGTGAAGCACAACTCTTGTAACCTGAATTGCTAATGAAGATGTTA  
AATAATATGTTTCAAAACATTT  
GCCATTTGTTTTAGTTATGAATATAAATTTGGTGGATGACTCTTTGTTCTCGTATGTCTC

TAACATTTTGTAAAGATT  
TTGCAAGATAAACATAACACTAGTTGTCTAGTTGACATGGTGGTACCTAACAAACCCAAC  
TCTTTGGTATGTTCCGGTTCTG  
TACGGATCAAATTTATACCATGAGTTCCATGACTATTTTGTCCACAAATTATGGTCATAA  
ACTTTTCTAAAAATAGAGGG  
AATATATTCTTGAGTGGGGTTATTTTCTCCTACTCATTCTAGAAAGAGAATCCATCATTC  
CATCTCACAATAAGTAACAA  
AAACATGATAGATATAACAATATTACAGTGGGATTACATACTTTTTTGATACATCTACTC  
TAACTTTTTGTACCATAGG  
TTTGAATGAACGTATTTATTCGTATCTATAAGAATAAAGGGGTAGGTTATGTACCACTCC  
TTTTTCACAAGTGATACCCC  
CTTGATTTATTTATTTATTTATTAATTTTGTATTATTAATAAAATTATAAAATTGAAAATAT  
GAAACATAAAATATAAA  
GTTTAAAAAGTAAATAGTATTAACTGCTAGAAAATACGAAACAGAACTTGTACTGTA  
AATAGAGTGAGTTAGAAGCTC  
GAAGATGTAAAAAGTACAAAAAAGTGGGCCAGAGGGTACCAATAACATATCCGTAAA  
TAAAAGTGGGCCAAAGATGTAA  
ATAGATATGATATCCCTAAGAATAAATGGTTACAAGAATAAATGGTTACATCATACACCA  
AATTCTTGATTCTAGCTTTG  
CTTGTTGATAAGAACATTGCCACTTACAATATTCTTCCTTATAAAAAGGTAACATCTTTT  
TTGGCATTTCCAACCTTAACA  
GAATTCAGAATACCACACAACCTATTTTAAGGTCCAATGTATATGTACAGATGGAATAATC  
TTTAAGAAATGAATAATATT  
TGCATTTTAAAGTTTGTCTTTTAAACATGATAACATGGGCAAATCCTGATAGACTAAAC  
TCAGAAGTCGAACATTTTCT  
AACCTTTTTTATGTTTTATAACGCGTATAATGAAAGCTGTATATTCTCTACAATGGGCAA  
ATATATAATGTAATACTAGT  
CTGTAATGAGATTCGTTTGAGTATAAACTACAAAGCCAAAAGAATACAGCTTTGCTGGT  
TTTGTGCAATATTATAAAAAG  
AGAACAACCCATACTTCATTTTAGCACATCAAACTTGTAACCTTTACTACAATGTCTA  
GCAAAAGTTTCTTTAATTTCA  
AATATGGTATTTCAAGAAAATCATCAACCCCTAAAACCAAACCACTCAATCACTTCAA  
CCATCAAAATTCGGTTCAAGC

>CsCML10

ACTTCTAAAACCTTCTTCTCAGAAACCTGTATACAACATATTCTGTGAAGATTACTGGT  
CGATGTGATGTCTAACGGTC  
TTGATTGTTGTTCTTAATCAGATTAGTGAAGAGGAGATCGTTTTTTTGACAAATGGAGA  
AGATCCATATGATGATAACGT  
TGTCCGTAAATTATACCATGAAAATCTTAAGTTGCTGCTTGTTACCGAAGGACCAGATG  
GTTGCAGATATTACACAAAGG  
TATTGTACTAGTGGTTTTTAAGATATGTTTATGTATAAATGATGGTAATTACCCATCGTTT  
CTTTAACCATGTATTTAAC  
TTTATTGTTAATTTTGTGAATTATATAGGAGTTTAGTGGAAGAGTGAAAGGTATAAAGG  
TGGATCCTGTGGACACAACG

GGTGCTGGCGATGCTTTTGTAGCTGGTGTATTATCAAAGATTGCCGCGGATACCTCATTA  
CTCAAGGTATGACTTTACAT  
CAACAACATTTAAATTAACCAGATGTCATACCACCGCGCTATAAATCACATTTTCTTCTT  
AAATTTATAAATATATTTAAA  
AAACCAGTTTTCTGAACTCTGCAATGCATATAAAGAGGGTTATTAATATGGATATAATAT  
ATAGGATGAAAAGAGGCTAC  
GAGAAGCCCTTAGCTTTGCAAATGCCTGTGGTGCATTACTGTGACAGAAAGAGGTGC  
GATTCCAGCATTACCGACTACC  
GAAGCTGTAATGAATGCTCTGCTCAAGACTGTTGCATAGTTCTCCTTTTGCAGATCCAC  
GCTGTATATTATTCAACTCTC  
ATTTTCCACAACGGTGAGCCATTAGGCGTGTGTTGTTTAGAAAAATAAGCTTACTG  
TTATTGTAACGTTAATTTGCC  
ATCTAGTTGAATAAGTTAAATTTGTATGATTCATACCGCCAAGGTGCTAATTAGTTTGAA  
TGACACTTAATAAACTTATG  
GGTTAGACTCCCTATGTGTTTCATATCTAGTTATCATTTATGTGAAGATGTTTAATATTTGA  
ATCTTTAGTATTTTGAGAA  
TAGGAAGAACATGTCCCTTAGTTCTAAATGGCCTTTCACAAAAAAGACATAATATTGAT  
GGTTGTCTGTCACTCTGTAGC  
AAATCAATTATTATGTGGCTTTTTGATCTCTATGTGATTTCAATTTCTGTTGCACTTCACT  
ATCATACAAGGGCAATGGG  
CCATTGACAATGGCTTGTGATGTCTGAATATTAGTATGCTCCCAAATAGTTACTAGCAT  
ACAACACTATAATTCTATC  
ATAACATTTTTGACTAAAATCAAGTTGCTTTTATTTTGTGTTTAGTAGTTTCACATCGT  
GATATTCAGAAAGAGTTAA  
ATACTTGATTCTGGGTCATACTCATTCTATAGTTACTAGAGGCAAAATAGATGAAGCCTA  
TAAAGTAACTAATGAAGTGC  
GGAATGGTAATCGTCACTGGTATTAAATCGCAACAAGGAGTTTGATTTTACATGATAATT  
TTCAGACTTGTATGATACTA  
AGATTTTCATAGTTTGATTGTTAGATTTTCAGGAATTTCTTTGTTCATTTGGCAGTCTCTCT  
TGATCTTATGTCTTTATAG  
TTTGTACTCGGCATCTGAGTAATTGTATAAATAGAATTTGGTTATAAGACAGCCCAGAAC  
AAGCATTTCAGTTAAACTAAA  
AAATAAATTAAGGTTCTCAAAGAGCAAAAGAATGAGTCGTAAGATACCCTGTGATATAC  
AAAACACAAAGTCGTTAAAGA  
TGACATTTTTCAGATCCGGCTTAAAAACATGCGTTTTAAGATGTTAAGGACCATTCTA  
ACCCCTCATTTAGGACTC  
TAGTGATGCATTCTTTGTTTACACTCCTAACTCTAAGGCCAACCACAATGTTTATCCTAC  
ACAACCATTTTATAACCCCA  
TATCATCATTAATCTTTTAACCAAAAACTACAACTACACAAAAAAGCAAAAGGCTCG  
GTACTACTACTAGGAACCCAGA  
>CsCML11  
GTATGAAAAGCGACGAAAACGTAAGAAAACGGACGAAAACGTAAGAAAACGTAAGAAAACGTAAG  
AAACGTATAAAAAGCGAAAAAAC  
GGACAAAAATGTATGAAAACGTAAGAAAACGTAAGAAAACGTAAGAAAACGTAAGAAAACGTAAG

GTGGTTATTA AAAATACAAATAA  
TAAGAAAATAAATAAGAAAGACAAAAAAAACATGGACTTAGGTTTAGACTTATTAAA  
TCTTAGGTTAATCACCACCATT  
AGATCAAAC TAGATGGAATGTGGAGATTTATCCCTTAGTATGCAAGGATTTTTGAGTATG  
CAAATAAAGTATCTCTGGC  
ACACCAATGACACCACATAGTCACATACCGTATGCTCTAACATTTTTTATAATTAAAGTT  
TGAAAGTGCCATAAAGTGCC  
AAAATAAGAAAACACATAAATATTCGTTGTAACCTACCCTAAACCTTAAGTAAGAATAA  
ATAACAAAATCACATTTAGTA  
ACTGAAACATTGACATTTTCAATAAAAGGCCACGGGGCCACGACAGCAGCATAAATA  
AGCTATTCTCCTAACAGCTTCC  
AGTTTTTCAGAGAACAACCTTACTTAATTCCACATTA AAAAAAAAAAAAAAAAAAAAAA  
AAAAAAAAAAAAAAAAAAAAAGGAT  
AAATCACGTTTGTAGAGAAAACAAAATAAATTTCTCATGATCATTGTCAGCCTTGAAAT  
GCCATAAATAAATCATGACAT  
ATTTTTGTTTTGGCAAAACAAACACAGTGAACAGTTTTTTTTGCATTTGCATTATTAGATT  
ATGTAAGGCTAGCAAAATAA  
GTATCACTTTTGGCATAACAATTTTAGAGGAGAGTTATTTTACATGTCAAAATTTTCTCAC  
ATACCAATTTAAAATAAAAT  
CAATTGTTGAAATTAAAAGCATTTTATATTTTTTATAATTTAAATATTCTTAAATCGTTAA  
TCGTTAAGCGGAAATAAT  
TACACCATCGCGACGAGTATTTAATTATTTTTCTATAAACGGGCACTTTGATATACTTTTCG  
AAAAAGAAAAAGAAATAA  
CTTTTCTCATGTTTTTTTCGTCTTTTTTTTTTCGAATATGAGATTTGCATGAAAAATCACAT  
GTGATTAAAATAGTAATTT  
GAATATCACATTGGATATTAGTGTTAAATCACATATGCTATGTAATATCACATGTAATATTA  
GTGTTAAATCACATATGA  
TATTAGTGTTAAATCACATATGATATTCACATGTGATATTAGTGTAATATCATATGTGATTT  
AACACTAATATCACATGT  
GATATTCAAATTAGTGTTTAATCATATGTAATTTTTTTTCAGGCAAATTCAGTAAAAAAA  
AAAAAAAAAAAAAAAAAAAAA  
AAAAAAAAAAAAAAAAACGTGAAATGTACGAAAAAAAAAAATTGTCGAAAGTATATCAA  
AGTGTTTATCTATAGAAAGATAA  
TTCAATGCATGTCGTAATGGTATTTTTTTTTTTTCGCTTAACGATTAACGGTTTGAAAGAT  
ATTAATATTTCAAAAAAAAAA  
TGATGAAAGTGTGTTTTTTTTTAAATTGTTGAGATTAATCTCATATATTATATCAAATAAA  
AATGAAGGGAAGATGAAAG  
GTAAAGATTGATTCGTAAAGAATATTTATCTTCAAACGATCTTAAATCTACGTTTTATAG  
TATTTAAAAGTGTTTAAAA  
AGACAAGTTATTTTCACTTGGACACCTAATTCGTGTAACCTTTTAGAGAATGTTGATA  
AATCATGAAAGATTGTGTAAT  
CTGTTCTTTGTTTACTAATGCTGATTTAACTTTGTTAATTTGTTGCCATAATTATCTCC  
TAACATATGATAGAATTTT  
TTTCACCTTAGAAACAAAAGGTAATCCGTATTCCAAGGACATCCATATTTCTTTTGTTTT

CTACAACCATTTTATAAACA  
TTCCTAAAGGTATTAGAAATCAAATAATCAAGCATAACACAGGAATCAAAATTGTTGAT  
TGCTACCACTAGGCATATATA  
>CsCML12  
GTTTTCCACAACCACAAGTTTCTGGGTTTTATTTACTCAACTTTTCCACTTTGTTTCG  
CCTAAGTTACCAAACCTTTCA  
TTTTGTTCACTTAGGTTACTGAACTTTAGTTAAGCGTTCAACCTCCATTTTTTCAGTGTA  
TCAAAGTAACCCAAATGCAT  
TTTTTAGGTAAGTTAAGTAACCTAAATGCCTCATTTTACAAATTCAGTAACCTGAATGTC  
AACTCCGTGTAGTCCAATAC  
CCTGTTTGCACAAAAAAAAGTTTGATAACTTAAGCGAATAAAGTTGGAAATATGGGT  
AACCTATATGTCTATAAACCCC  
AAGTTTCCACAACCACAAGTTAGGCAACCAAACCAATATTTCTGTTGGTAAAAATTC  
ATTATTTAATGCTTTATATAAT  
ACTTCTACATGTTTTAAAGCAGACAAAAGTATTCATATGAAATATTCATATTAATTA  
CTATACAACTACAACAAAT  
TACCATTCCATTTATTAAAGTAGAACTAATTGATGATACCTGCATCAAAACCATCAGTG  
AAAATCAGTCACTGTTGTGA  
GAACTTCATACACCTTTTTCCGAATTTGATTATTTTGCCCCTGTATCGTAAAATTATAAGG  
AGATTTGTTCTGATAAATA  
ACACAAATATGACATGATGCAGAGCATACTGATAACCAACTTCAAAAGGCAACTCCAC  
AAATTGTGGGGTGTTTAGGTTT  
CTTTGCGATTTATGGACTTTATTTTACTTTGTTTCTTAAGTAAATCACATGAAATCAGCC  
GTTGATGATTTTTACATGCT  
TGTTAGACACATATCTGCTACAGTATTAGTCAGCTTTTTAACAATTGAAGTTATGTACTA  
ACTTTGTAAGAGCTCCGGGT  
ACGGTGGCTGAAGGCTCAAGCCATCACCTTCGGCGCCACCCTATGGCACGAGACACC  
ACACCTAGGCTGGGCTGGTGGGT  
CTTGCGCCGTGGCCACCAGCTCACGCCGAAGCAATATTTTTTTTGTGTTGGGTTTGT  
TCTTTTTTGTGTGTGTGTG  
TTTGTGATGTGTTTGTGTTAGTGATATGTTTGAGTGACACTGTGATGTGTGTTTTTTTT  
CCCCTGTGTTTTGCAAGTTT  
TGCTTGAGGAAGAAGACGATCCAATTTAATATGCGTGAAATAGTACATTTCTTGTTGGA  
ATAGTATCTTTTAAGTTCTAG  
TTGTATTAATTATGCCACATGCAACTTTTCTTATTGGACCTCACATCCAATCTCTGTCTC  
AAAAAAGTTTCACATCTGA  
TTTGTTTTAATTGATATTTAATGTTTCAGTATTACTCATAATATAAGATTATATTGTAGTTA  
ATTAAGATGATAATACAT  
TTAGAAAACAGGAGGCTCTCGAATAGGTAATGGGTTAATTAGGTAATTAGTTTTTATATT  
TTTATGTTTAATTTAAAAAT  
GAAAAAATAAATAAATAAATGACGGCACTAGAAAACTGGTGTTATGCCATGGAGGGGTG  
TTTTGGTGCCATAGACAAAACCTG  
GTGTCATGAAAAAATGTGCTGAGGTGGCACTACTTTTTCTACGGCACAACCCATGG  
CACGACATTGTACCTAGCCCTC



TAAGAGAAAGACAATTGAACAATATAATGATGTCATAAAGAAATAATAATATGTTTATAC  
ACTTTGTCATTAGAAAACAA  
AAACAGGTCAATTTGTCCCACTTCCTATTACCTAAAGTCTACAGGAAACAAAGCAACT  
TCCTTTGGATTTTCCACTTCAA  
ACCACCATTTTTTCCAACACTACATTCCAGACACTACCTTCAACATATTCTCTTTGACTTAT  
GACTTTCTTACACACACAAA  
CACCTTCATACACGCACAAAAAATTTAGCAACGCACACTTCTTATAAAGCCACACTTCA  
TTCTTCATTCAAACCTCACAAG  
CTCTCTTACTTGACTTATAACATTCATATTCTTTAGTTTCATTTCACTAACAAAAAAAAT  
ACATCATTAACCAATAACC  
>CsCML13  
CTAAATTTGTGCGACAAATCAATTAATTTAAATTCATTTTTTACAGAGAGGTGAATGATCC  
AAATTTGATGACCACACTTT  
TATGATGGATAACTCAACTTAAATCTATAAGAAATAAAAATAATCAAGATTACATACAGC  
AAATAGGATTAAGGAAGACC  
AAAAGAAAGGGAAAGTCTAATAATAAATGAGGCACATGCTGTGTTTAGAGGAAGCTG  
CATGAGAAAGTTAGAGCATTGG  
GTGTGTTATGTATATCATGGCTCTTCATCACCGCCACCTCAACGTCACATCATCATAACA  
AACTTTCACAACTTATAACC  
ACAACAAACCCCTCTCCCTCATAACAAATCTCAATATCTTCATTTGGTACCCACCACTAA  
ATAAAACATTACATATTAAAA  
AAAATAATAATAAAAAAAAAAACTTGACAAAAGTACACAATATACCCTCGTCGTGGC  
CACAAAAAGGGTTGTGATGAA  
GAGGGACGAAGAGGGGGGCGGTGTGGTGAAGAGGCACGACAAGGTGCCATGTCACC  
TCCACGGCGAGCCACAACAAGCCA  
CACCAATACGCGTTGCATGCAGTGTTATGATTCATACCGGTAGATATCCATAGTCCACTT  
GGACAGTTGGTAGTTAGGAT  
TGTCATATGGTATAGTTTGTGTTGGTTAACTGTATCAATCATAATTGAAAGTTGGAAAGAA  
AAATAGAATCATAAGATGTT  
AGCTAGTTTCTATGATTGTATTGACTTTTATACCAACAAATATATGTAGAAAGTTAAGTA  
AATCTGGTTAAGATTTTTG  
CATGGTGTTTCATGAACCTTTGATGTTTTATAAACACAATAACTTTTTGTAAAGAGGTTAAAG  
TATTTAGGAAAACATCTATA  
AATTCATAACGTACTTTATAAAAAAATTCATTATGCTTTTATCTACTTCACTTATTGTCATA  
ATACATAACCGTTTTTCATT  
TTATTCGGTTATTTTCTGTCCGGTTTTATCCGTTTTTCGTAAATCGTCCATTTTTATCCGTTT  
TCAATTTAATATGTCCGG  
ATAAAAACAGATAAAAACTGTTTTGACATGGATAATAAAAACGGTTTTATTTCGTTTTTAT  
CCAGACAGATTAAAATGAAA  
ACGGATAAAAATTGACGATTACAAAAACGGATAAAAACGGACAGAAAATAACCGAAT  
AAAATGAAAACGGTTATGTGTT  
ATGACAATAAGTGAAATAGATAGAGCATAATGAGTTTTTTTTTTGTAAAGTACGTTATGA  
ATTTATAGCTTTTTTTTCAAG  
TATTTAATCAAACCTTGAAATAACAGTCTAAGTATACTTGGTCAACGGTCGTAGACTTGTA

GTTTTAGGTAATGTAATAAC  
GAAACTCTAAGATGTTATCAACATAAATTAAGTACTATTTTCATTAAATTTGATTAAATTATT  
ATTTTCAATAGGTTTCATAA  
TAAGATGATGCGTACCTTATTTGTAGAAAATTAAATATTTGATCAAATGCAAATTGCAAA  
TTGCAAAGCATAAAAATGGA  
GTATCATTTGTACACGTTGCTTTTTTTAATATATGATAGTTGTACTTTTGATGTTGATGAC  
GGTGTTCATATTAAACTATC  
ATCTAGAGATGATGAGATATGACCAGGAATAATTACGTACAGCCAAGGGTATATCTAGC  
AGATTCTTGAAATATCGAGGT  
GCTAAAATGATATAATCTTGGGTAGTACTTTCTGAGACATTTTCCTATTTTTGCTCCTTCAA  
CATCTAAGTTTGGTCAAAA  
GTCGCCCTACGGAGAAAACGCGGGAAAAAATGCATGATCTCTATATATATATCTTGCAAT  
TTCAACTCCATTTTGCAATC  
ACAACAAATATTTCTCCCTAAAACATATCACACACTCCATAAGTAATCTAACTATATATCT  
CTATAGTTACTCAATTGTG  
TTATAACGCTAATAACCTCAACGCTGCAACTATATTTCTCTGGTTACTCACTTCTATTTG  
ATTGTGTTTGTAAATTTTC  
>CsCML14  
TTAACTTGTGTTAGTTATAATAAAGAGTGTTTTTTTTGTTGAGTTAATGTGAAATGTTAAA  
GTTGATGTGACGCTGACGTG  
GCAAGTGTTAACTTTAACACAAGATTACCACACCTTGTGCTCTTAGACTATGTTTACC  
AATAGGTTGACAACCCAACCG  
GTTGGATATATCATACATAAATAATAATTTTTAATCAAAATTCTCAAATCCTCCCATGAC  
AATGACCAAGGTCACATGA  
CAACCTAGATTGTCAACCTCCAATCTGCCAAATGGCGGCTAGTGAATGGCTATTTGCTT  
TATTTTTCTTTTTCTTAAAG  
AATAGATTGGTTGTATATATAGGTTGGGTTGTTGGTAAAAAGGTATAAATTGATTGTGTA  
AGTGAAGAAAAGAAAAATA  
ATATTTTAGTAGAGATTGAATCGTGATACATTGTTAATAAACATAGTCTTAGAGGAATCC  
GTATGACTGCATGAGAAATA  
TTTATAAAATCTGAATACGCGTTGTTGCATGAAGTGTTTTGATTCATACCGGTATAACCC  
ACGTGAACTGTTGGTAGTTA  
GGATTGTCATATGGTTAGTTTGGTCGGTCAACTATATATATATCAATCATAATTGAAAGTT  
CGGAAAGAAAAATAGAATC  
ATAAGATGTTTACCTAGTTTTCTATGATTGTACTGACTTTTATATCAACAAATATTTGTAG  
AAAGTTAAGCAAAGTTGGT  
TAAGATTTTTGCATGGTGTTCATGAACCTTGATGATTACAAACACAGTAACTTTTTGT  
AAGAGGTTAAAGTTTTTAAT  
CAAGTTTGAAATAATAGTTTAAAGTATAGTTGGTCAACGGTCGTAGACTTCTAGTTTTAG  
GTAATGTAATAACGAACTCT  
AAGATGTTATCAACTTAAATAACTACCATTTTCATTGAATTTGATTAATACTATTTTCAAT  
TATGGATGGCAATTCTTGA  
CACGATATGATAAACACGAACCTGACATGAAGTTAAACAAATTTAGGTTGAGGAT  
AAAAAAGTTTGGGTAAAAACA

AGTCAACCCGTCTAACCCGTTTAATAAGCGGGTCGTGTTTGGGTTGAGTAAGTATTAAA  
CAGGCCAATCCGTGAACTCGT  
TTAAGTATAAAATACTATAAATAGAATATATAACTTAGATTTTATGTTAGATTTAGATTAGA  
TGTATTTTATTATGTACT  
TAGTATGAGTGAATTATTATTATAACTCACGTATTACTGAAATCGTCGTATAGTTTTTTTAT  
GTTATTTTTATTATTTTT  
TAGTTTATTATATCATTTGCATTTAAATTAGTTAAATCGACAAACCACTTATCATATTTACC  
ACTTGACCTCTTACTTAA  
ACAGACTAAACGTATCACAAACGGGTTACACATACGTGTTATGCACATGTTTCAGTTTTT  
TTGACACAATTAATAAATGAG  
TTTTGTTTAGGTAGAGGTTATAATAACCCGCCAATTCATTAATTCAAATAAGTCAACTCA  
AACACGACTCGATTGTCACC  
ACTTTATTCAATAGGTTCACTAAGATGATGCGTATACTAAGATGGTGCGTGTCTTATTA  
GTTGTAGAAAATTAATTAT  
TCGATCAACTACAAATTGCAAAGCATACAAAATTGAGTATCATTTGTACAACAAGTTGC  
ATTATTAAATAATAGCCAAGG  
GAGTATCTAGCAATTTTTGGAGATGTTTCCTATATTTTGTTCCTTCAACTTCCAAGTTTG  
GTCAAAGTTACCCTACGGA  
GAAAACACGGGAAACATGCATGGTCTCTCTATATATATCTTGGAATTCAGCTCCATTGG  
GCAATCAGAACAAATATTTT  
TCCCTAAGACATATCACACACTCCATAAGTAATATACTACATATATCTCTATATTTACTC  
AATTGTGTTATTTCTAGCA  
AAACGATAATAACCACAACACTGCAACTATCTCCTGGTTACTCACGTACTTGTGCTATTT  
GAACGTATTTGCTAATTTTT

>CsCML15

AGTCAAATACATAATGCCACTATGTCAGAAATTGAAGAAGGGGCGGGTGTAGGCCGTA  
GGGGTGAGGGAAATGAAGATT  
TTTGTCAAGTCGATCATGTTTCATTTATGTTAATTGTTTTACAAGTTAGAAATGAACATATC  
TGTTGGTTAAATCGGAGTA  
CAAATATTTATAAGATGCATGGGACAAAAATTCCCAAGCTTTACAAGATTTTATGAGAA  
AGGTGAAAGAGGTTGCACATC  
TATAATAACAAAGTTTCAAACATGATATAATATTATTAAATTGAATTATATGATTGCATTTA  
TTGAGAACCGGTTATGTA  
CTTTTTTTTAAACATAAGGCTGGTCCCAGTCGCAACCTGGGACAGCCTGCGCCACGTCA  
GCTTCTCTCTACAGCGACCTG  
GGACAACCCGGATACCCCGGTCGACAACCCGAGGAATTTGTATTAAATGTTGCTTTGG  
AAAGTAGGAAAACAAGAGTTAA  
CATCGGTCTTTATTGCAACCGATATTCCAAAAATTGTTCACTCGACCGATGTCACACTC  
GATTGCCGCATTTCGTTTGAAC  
CGATGTTAACATCGGTTGTTGCATGGATTTTTTGTGTTGGCAACCGATCTCAACCTACTCG  
ACTGCGACAAGCCTAATATAC  
TTGTTTTAAGTAAGAGAGTTTTACAAATATTACTAATACCTTATTATATTATGATCATTGTC  
ATTATTTGAGTTTTATAT  
TATAAAATTTTAGGGTGAGCAAGTCGATCCAAGAACTGACAACCGATGAACCAAACCT

TAGAACCAACCAAAATGAGAAA  
GATGGAGTCGGTTCGTTTCGGACCTTGGTCCTAAATTTATTGATATCGCTTTTGATCCA  
AGCTCGGAGGAATAGGTCAA  
TGTTTAAAATTTGGAACACAAAATGACATGGGATAGTGTTTTGTTGATATATAATTATGG  
TTTAGTTAGGATGATCAACT  
TGTGTGCCCTCCTTGTAGTATTTTATAAAAATGGATGACACAATGTGTTTTGTGTATATTT  
TATAAAAATGGATGACACA  
ATGTGTTTTGACACGGTACTATTGCACGATTTTAAATAAACGACTTAACAGTTTTTTTT  
ATTAATATGACGGCAGTCCT  
AGCTATGACCATACATTATAAGGTCGTGGGTGGTGGTCTGGTTCAAATTACAAAACCA  
TGACAGACAATTAAGTTCAGT  
TCGCGGTTCAATTCTATGGAGGTTTATGTCTGGTTTTGGAGAAAACCTTGACATGCTTA  
ATTTTTCATATAAATTGTAG  
CATATCCTTATAGAAAAGAATATCAACTTTTTGGGCCATGGTTAGCACGGCCAAAAAGG  
CTTACTAGTGACTTAATAAAT  
TCGTTGCTTCTTCAAAAACCTACGTAAAAATGATTATTTTTTACTACGTATTTTCAACA  
AGTTCAAACCTAAGGCGCGCG  
ATATGTACCTTAGTTGTAGAAAATTAATTATTCGCTCAATTGCAAAATTGCAAAGCATAA  
AAAATTGAGCATCATTTGTA  
CACGTTGTCTTTTTAAATATATAATACTTGTACTTCGATGTTGATGACGGTGTCATATTAA  
ACTATCATCTAGAGATGAT  
GAGTTTATGACCACGAATAATTAAAGCCAAGGGTGTATCTAACACATTCTCGAAATATT  
GAGGTGCTAAAACGATACTTA  
CTAATTTAGGAGAGCAATTTCTGTGATAATTCCTATACGTTGCCCTTCAACTTCTAAGT  
TTGGTCAAAAGTCCCCCAAC  
TTAGAAAACACGGGAAACATACATGATATCCATATATATATATATATATTGCAATTTCAA  
CTCCATTTGGCAATCACA  
ACAAATATTTCTCGCTACAACATATCACACACTCCAAAAGTAATTATATATCTCTATAGTT  
GATTGTGTTATTTCTTGCA  
AAACGCTAATAACCAGCAACGCTTTAACTATATCTCTCTGATTACTCACTTGTGCTATTT  
AATTGTATTTGTAAATTTTT

>CsCML16

ATGTCATCAGTTTTGTAATTACGTCAATATCATTCTCACGCTTTTGTAATTACATCAATAT  
CATTCCTAAACGTTTGTA  
TTACATCAATATTTTTCACAAAGTTTCTCATATATATCCGAAAATCAACATGTTCTTTCAT  
CACTTCATCACTTGAGGTC  
AAAAAATATATATGAACAAATAAATATATATGAGCAATGTATTTTTCATATCTATATCCAA  
ACTTTTGTAGTTCTATCAT  
ATGTTCTGTCATCACTCGTGGCCGAAAAGAAAACATGAACAATATAATTATGATCAATAT  
AAGAGATAAATAATAGTTTC  
AAATTTAAAATCAATATAATTATGATTTAATTGATTTTTTGATATATATGAGAATTTAAAAG  
TTTAAAAATGATATTAAT  
GTAATTACATAAGTTTGAGAATGATATTTATGTAATTACAAAACAAGAAAAATATTTATG  
TAATATTAACTTTATGAAG

TATACATATGTAATTTTCTCAATATAAAGTATATTTAAATTTTAGGAGAGAAAGTATGAAA  
TTACATTCTTTTTTTTAAAA  
AAAATAGGAATCCTATTTTTCATTGTCATTAGCATGTAAAATGATGCTAATTTTTATTGTC  
CATTGTGTGTCAAACTTCA  
ATTAATCTTTATCAGTTATTATATTCATTGTAACCTTTTATGAATCAATATTATTGAAAATG  
CCTATCAAACCTATTATTT  
TTATAAATACCAAATAATTCTATACAAAATAAACATCTAAACATCAGTTTTGGAAGTATT  
TATTTTTACGCAACTTATAA  
ATACTTATCGTACGTAAAGCAAAGCACAAAAACAAAAATAAAGATAAAATAATAAAG  
GACTATCAAACAACCTCAAAG  
TTCGTAAACTCGTAGTTTTAGACTTTTAGGAAATGTAACATGAACTTAGATAGGGAAAC  
ATTTTTCTTTCTAAAACGGC  
ATAAAATTAAAAGGCATAGCAACAAGCAAAGCAAACAATTAAAAAGAATCGGAGAT  
GGCTTTACCAGCTGAATTAGTTA  
GATAGCCTCTCAATCCAATTAATAGAAGGCTTACGAAATCAAATGAAAATACAATCAAA  
CTAAAGGTGTTTAAACAACGCG  
TTAACAATGAGACTTTTCTTCGGTCTTGAGGAGGCAAAAATTAAGTCGTTCTTAACTT  
TCAAAGAATCCAAACAGTGGA  
ACGGACAACCGCATCAAGTACTTTGGAGAGAATGGGGACATGTTACCCGAATATGCAA  
TGGAGAAAATGTCATTATTTGT  
ATATGAGTATCGTGTAGGTTCCACCATTTGAGGACATCTCGCCATGTTTCGGAAGCCAC  
ATGATATGTTTTTTCGTTTCA  
ATGCCTTCATCACAACCGGGCATTTAACGAAACTCAAAAAGTTCTCAACTTAAATTAA  
CAATTTTTATTGATTTTGACT  
TTGATTTTCATTTATTATTATTTTCAATAAGTTCATACTAAGATGATATGACGTTAATTAGT  
TGTTGACAATTAGATATT  
CGATCAGTTGGCAAATTGCAAAGCGTTAATATAAAGGATCGTTTATATATACACGTTGTC  
TTTTTAACTAAATTATTGGT  
TGTATAGTGATGTACATGACTGTGTCATATTAACTAAGATCTAGAGAGGATAGCCACG  
AATAATTATTAAGAAGGGTGT  
GCGTAACATATTCTCGAAAGAGGTACAGCAAGAATATTTTAAGGTTACATTTCTTAGAT  
GCTTCCTAAATTTTTTTCTTC  
TTTCAAACTTTCATTGTGTCTTACCCCCCTGAACTTCTAAGTATGGTCAAAAGTCACC  
CCGTGGGAAAAACGCGGGAAA  
CATGCTTATGATCACTATATATATGATGCAATTTTCATCCATTTTGCAATTCAACCTTCTTAA  
TTTATTTTCTCTACAAG  
ATATCACACAGTTTCGGAAGTTATATAACTATATTTCTATAGTTACTCACTTGTGCTCATTG  
ATTGCATTTGTTAATTTTT  
>CsCML17  
ACCAAATGGGCCCCACAAGGCTTTTGGGGACGAATTTTGTAGTTGCTAAAAGACTCGA  
TTCAACATTTGAAACCAACAAA  
GAAGAAAAGCAAATTGTGGCGCGTTCTAAAATGCTCCATGTTTTTTTTTAAGTCACGT  
GTTAGACTTGTTTAAAGATGA  
ACAACACATCCTACTATGAACGTAAATTGAATATAACATATCCAAAATGAACAACATGT

GAACCGGTTTAACTTATCTAG  
AAGATGAATCCAATATTTTTGAATATCGATCAATTACACCTTTCAAATTTTTATCTAGTT  
CTTGTCTAATTAGATATAC  
TTGCACAATTACACTACTACACATAAAACTCATTAGATACGGTTTTTAAGACTATTTTTT  
ACTGTTTTAAATCGTACTA  
GATGGGAGCTTACAAAAAATGAAATACTTTCTAGTATGGTTTTGAAATGTAATAATTAT  
TTGGTACGGTTTTCTTATAC  
CGTACCAAATGTCTCCAGTCAAGCCACATCACATTTTTCTTTTTTGGTACGGTTTCTAAA  
TAAAACGTATCAAAATTTGT  
TGGTTCAAAATAAAAATAGATTTCCTTTTTCTTTTATAAAACCTGTAATCAAACACTAGCG  
CCATTCATAGCCGACCCAAA  
CAATATCATTTCGATTATACACAAACAATATTCAAGAAACATAACATTAATTCTATATATA  
CATCAACCAACGCAACAAT  
ATAGATTAGACAAGTGTTATATATTACAATTTTAAACATCATTATCATGAAATTATAAAAC  
TTTAACTATGAAGGATCCG  
TTGTATCTAAGAGAGACCCTACAACCCTATGAAAATATGTTTTGTAGCAGTATCAATTTG  
GCGTATCAAAATATGTTTTA  
TGTAAGTGTAGTATGATCATTAACCAAATATGAGAAAGATCTACAAAAGGTGTCCCAT  
AGCCATTTGCTCGAGAGCATG  
TCTGACCTCGTCGTTACGCATCATGTCACCCTGGCCCCGCCTGCCGTTTAAAAAAATA  
GAGACCAAAAATATTAAGG  
ATGCAAACTGAACTACTATAAAAGTAACCAGCTAATTACATACCATTGCGTATATAATAT  
AAGGGAGGTGATTTGCACAC  
TTTTTATTTTGATTGGGATAGAGCACACTGTAAATACTGTATAACAATATTATACACAAA  
ATAAAATGTCCCAATAAAAA  
CCTCGAATGTGCAAATTAGAGGTGGCAAAACGGGCGGTCTGGGCGGGCACGGGCTATG  
GGCTAAACAGGCACAGGCTAAAT  
GGGCACGCGCTAAACGGGCACGGGCTAAAGGGGCGCATGTTATACGAATCACTTTAGA  
AAAGACCTAATATGACGAAATA  
AACTCATCAAACGTAACATCTCATTTATATTTAACAAAATAAGTATATTCTATTTATAAGT  
TTTTCTTTAAACAATTGT  
AGTGTTCTCCAATTGATAGAAAATATATGTCCGTTTGTGCCCATTAACTTTTATACGGG  
CAATATATGCCCATTTCAA  
AAAAAATATGCAAATGTACTCACATCTTTTAAAAATTTACCCAAACTAGCCAGTCTT  
TTTAATTCTGAACACAAATT  
ACCACCTCTAATACAAATCAATTCCTATAATATAATGCCAGTAGCAATTAGCCAACTTGA  
TGACAACATACATATGTTAA  
ATTGTTAAGTTGCACTGAAAATGATTTGTTACTCTCCCACTTTCCTGGATGTATCCTAAA  
ATTTGCTTCACAATGAAAGT  
TCGTCATTGCTTACCCCCTTCAACTTCAAATATTGGTCAGAATACACCCCCGTGTGCAA  
AACGCGGTGGCTTGTACGGCT  
GTAATAAATTCTATATGGCTATATATGTTGCAAATTCAACTCTATCAATATACCTTAGCA  
CTTCTATCTTTCTTTAAAC  
TTCTTATCAACAAGATACCACACTCCCGTAAGCAATATATATATACTTATATTTAATTACTC

ATACTTTTAAATACTTTG

>CsCML18

ACAATGATTTGTGAATCAAATTTGTGATTATAGATTCATTCACCATAAAAAGATGTTT  
ACTTGTGAATCAAATCAAAA  
ACATGAATCAATTTGCTCAAACGAAGATTTCTCAATCTTCTCAAAATAAAAACCTTCTC  
AATGGAACCGGAGCCTATATA  
TATATATATATATATATATATATAGAGTTAGGATCAAATAAGAAGAATAATAAAAATAAGAA  
GGATAGGAAGTAACCACA  
ACCACTCATTCTAGATGCACCTACAAAAATGGATGCATCTTCATTCAAATTTCCCTCCC  
ATATTAAAATGTGTGGCTAG  
AATTACTTCTTACCCTTCTCATTTTAATTATTCTTCTTATTGGATCCCTTCCCTATATATATA  
TATATATATATATATAT  
ATATATATATATATATATATATATATATATATATATATATATATTTATATATATATGCATGCATGCTA  
AAATCGCATCTCAA  
AATCCAGCATTCTTTCTCGCATTACCTACAACGCTATCTTCAGATATACGAACCCAAGCT  
TTACACTTGTGAATGAATCG  
GTA CTCAATGAAATTAATAAATGACTTACTCCCAAATTTAGTATATCTAAAAAGATTTTAT  
TTTTCTCGTTAAATCAAGT  
TTCAGGTTTCAGATTTGCATCAGATTCATTTGTGTTTCAAATTTTTTTATAAAATTCGGGT  
TTAGGTTCTAACCTTGACA  
CTTGATATGGGTTTTTCATTGAGGTTTGCATGCATGTTCTCTAATAAATTAGTAGATATACT  
TGGGTTTTGATTCAATTAA  
CGGTAGAAGTTTGAAAGCAACAATTACTATGTTTGGGACTTGTTTGGTAAATATGTATG  
GAGTGAGTGGATAGAGGTTGA  
CGATGATCAAAATTTGTATGTGTGCGTGTTTTGATAAATTTGATACTTTAGGATTAATATG  
ATGAAAAAAAAAAGCAAGGG  
GATCGATACTTCAACTAGAGGAGTGACCTGTTGGTTCATCAAACCTACATAATTTTTTTAT  
TTATTTTATTTAATCGATTT  
TATTTGAAGATCTTGAGGCGTTCCTCAATTTTTATATAAAAAGAATTGAAATTCGATGGA  
AAAAAGAAATGAGGAAGAAG  
ACGAGGGCACGTTAGTCATTTCACTTTGGCGAAGGATGAAATCGGACCTAAGATTTCC  
TTAGCGGAAGCCCGCCTGCACT  
TTCCGAACCACACGGATGAAATATGCAATTTGGCCAAACCACGCTGAGGTTTTTTTGCA  
ATTTACTCTAACTTTATATAG  
GAAAAAAATAAAAATCTAATACCTAAAAAAGACAAATACAACTGAATGTCTTAACT  
AGAATTGGCCCTTGAATGGATT  
CAAAACATTAGTATTTTTTATGGATACAAGCCCTGTCTGATTCATATCGAAAATACACTA  
TGGATTAACCACCATCTAAA  
GAGACAGTGATGCCAATAGCATGATATATCAAATACAATATCATTAACGTGCACAAGCTA  
ATGTTACTATTACATAAAAT  
TAATGCAACAAGCAATTAAATGACTAAAACAACGAACATGACACAATGACAAAGAATG  
CAAAGTACAACAACAATATCAA  
TCATATTCATGTTGAGGTGAGGCATGATGTAAACAATCATATACTTATCCGGGGATGATG  
ATAGATAATCTGCTTCTAGA

AAAAATATGTGACAAAACAATGTATGCAACTAAAAATATTTAACTCTTGGAGGAATGAG  
GATATATATTTCCCTATACGTT  
GCCATCACTTTGAACTTTCCCCTTGAACCTTCTAGTTTTGGTCAGAAAGCATCCCGTGT  
GCAAAGCGTGGGGGCTTGTAC  
GGCTTTAAAATTCCTATATTTGTTGCAATTTGAACTCTATCCTCGTGGCTATTCACTTCTT  
AGCATATTCAATTTATCAA  
GAGACTTTTCTTCTCTACAACATATATATTACACACCCATACATACTTATCTTTAGTTAAT  
CGTTTTCTTGGATACTTTG

>CsCML19

AATGGTTAGTCCAACACTTTTTAGGACTAGACGTAAATGGCAGGGGATAGATAGGAAA  
AAAATGCAGGGGAGTGGAAGCA  
AGACACCAACAGTGAAAGGTGGTGTTGTTATAAAAAAGGAAGAAAGGGTTGTAGATA  
AAAAAGAAGAGAAAAACAAGGGA  
AAAGAAAAGCTGTTTAAGGAAGAGGATGTTTTACACAAAAAAGGGCAAAGAAGTTGT  
TCAACATTTTAAGCTAGGTTTTG  
ATGAGAGGGGAAGGCTAAAATGGTTGAGTTTGCAGGTTTTGATGTTAAAAACATGGCT  
GGTGCTGCATGTGTTGAAACCA  
GGGTTGGTGGTGGTGTCTGCTGATGTGTTTAGCGGTGTTAAAACACCCTTTAGAAGCAG  
AGAAAGGATTACAAACTGCGTC  
CTTGCACTTTTCGCCCAAAGGCCATCCTAGGTGATGTTTCAATGATGAATACCATGTCAT  
GTGTTTAATTTTTTAATTTG  
TAATAGTACAATACCTAACTTAAATGTTTATTGTTTGCATACTTGTTTTTGCAGACAAGG  
TAGCAGTATCATCATTACTT  
TAAGGTTTCATGTTTTGTGTGTTTCATCAGTTTATGGATATCCACGACTAGTGTGTAGATCA  
TTTGAAAGTTTAGCAGTTGA  
AGGTTTTGCAGTGGAACGGCATCATCTTTTATATTTTGTGAAATGTCAGTAGAATCTTG  
TATCAGACAATGACTCACTA  
GTTTCAGTTGTTTCAGAATTGAATCTATAGTTGACTGTTATAAGTTAACTTGCTAAATAG  
TTAGTTATGTATAATATTTG  
TTTGTGTGTCTTATAGGTTAAATTCTGTGTGATTATACTAGTTTATCAGTTGACCTTTATA  
AACTTATACTTAAAATGTT  
GGGTGTAATGGTATAATCAGCTCAAACAATCACCCATTTATGTGTTGGTAGTTAAAATAA  
GAAATTAGATTGTGTTAGAT  
TTAACTAAGGTATGGTATAAATAGGTATGGACTATAAATATAACACCCTCGACTAACTAA  
TAAAAATCAGACGTTGACTT  
GGGCATTACGGGTCAAGGGACGAGTTTAGCCTCAAAAACCTCATACTTTGGACTACTGA  
AAACTAAAATGTCATGTTTTGG  
TCCAGGACGACATTTTTGACCAAGTTTAGGGACCAACAATGTATATATATATTTTTTAAAC  
AAGTGTTGAATATTAATAATT  
TTAAGCTTCCAATTACAAACAAGTCTTAAATATTTTATAAAATAGTATAGATTTTCGAGCT  
ATTCAAGTTAACTCGAATAA  
CCCGAATTTAAAATTTGACTCGAGTAACCTGACTCAAATAAACTTAATCGAGTTCATGT  
TCAAGTCGGGGTCGGGTGGCT  
TTTTTTACGCCTACTTGTCTGCTTTAGATTCCATTATACTCCCTCCGTCTCATATTTATTGT



CCATATTTCTTTTACGG  
ATGTCTCAAATTAATTGTCCACTTTCCATATTTAGTAAGAAAAAGAGAATATAATTGAGG  
AATATTCATTTGAGTGGTT  
GAGATTTATAAAGGTCCCACCTTTTATTAACTTTGTGATTCTTGTCCTGACAATAATT  
TTGAGACGGAGGGAGTATAT  
ATATACTAAACATGGGGAGGAAAGTTGCTGCTACAGTAACTTCCTCCCCATTAATTGCT  
AAGTTTACCAAAAAGGCAAAA  
ATGGTCCCTCACCATTAATTGTTATGTTTACCAAAATGGCAAAAATAGTCCCTCAAGTTT  
AGTTATCATGCAAACTAAGT  
CTTTTGTAATAATTCACGTCTACAAAAGTAATTCCGCTGCATCGCGCGGGTTCCCCCACT  
CGTTACCAACCTAATAGGAAT  
ACTCTTAAATACCAATCACGAAAACCTTTTAAAAAGACCAAACTAAAATATTTACGTA  
GTATTCCAAATCACATCTTCC  
TAAACGCGTCTCACGCGTCTTCCATCTCTATATCAACACACCCATCCACCACATTTCAA  
AACAACACAAACTTTCTAAAA  
>CsCML20  
ATTCTTATATGGAATATATTTTTCTCTAAATAGAAAGAAATTCCAAATATTGATGGTACAA  
AAATACGTTAGTTTCTCGA  
AATCAAAGAAATCTAGCATTCTTTATTGGGTTGAAGTTAGAAAGGTAGCCACATACTTG  
CCGTAATGAGTCCATTTAAT  
ATGTTAACTAAAAAGTGTTTATGTTTGTACTAGTACAACTTTCAAATTTTGTCTAAG  
AGTTATGATATTTAGACATA  
CAACACAAGTATAAATATATACTTAATGAATAAATCACTTGTACAATTACATTAAGTACTT  
TCTCTCTCTAAATTTTCAC  
CAATCAATTTTTTAAATCAACTAATCAAATCATTAGGTTCAATTTGTAGGCATGATTAGTA  
GGTCTAACAATCATTTTTCT  
TTGTCTAAATATGCACACCGTCATGTCACACAACCTCAAACCGGACAAAACTCTCTTTT  
AAGATATTGGCATGACTTTCA  
GGGTTTTTTTTTACAATTAGCAGAAATTGAACTTGAGATCTAGTAGTCACAAAATTTTTA  
ATATTTTGTAGCGTTATAAAC  
ACATGTTTATTGTAATTTGTTATAAACACATGTGTGCGTGAAATGTGCTTTTGTAGACA  
AACTTGTATGTAATAGAGAC  
AAAATAACAATATTTTGTGTTTTTATCGAATCAAAGTTTTTACATTTAGTATATCGTGTA  
AGATGAAAACGTAACGTAA  
GAGAGAGGTTTACAGAGCATATTGTACGGAAGTATGTGGTTGGCCGTCGGTGTACACCACA  
CCCCAAAAAGCCGGTGTAGAGA  
GAAGAATGGGCGAGAAGTCTTTCACCAAGTTATGTTATGGGATAATAATTGGTGTGCTTG  
GTCGAGTAGCTGCTCTCAGTG  
AAAAGAGGAAATATTTCCGCACCACGTTTAGTTTTGACATGTACATGCTACTATGAAA  
TTTTGACTTGTAATTGTCAGT  
AAACAACTTGTTTGC GGCCGGAACAAAATTAGGTTGTTAATTGTTTTCCTTATTTATAA  
GGAAAGCAATTTGAGTGTTT  
ATTGACTTCATGTGATTTTATTCGTTTTACCCTGCAAACTTCTTTATTTAGGAGAAACA  
AGTTTTCTTCCTAACGTCTG

ACAGGTCTCTAACAATGCTTCGTATTCAATGATGCTTTCTAGAATTCTTTCAAACCACA  
ACGTGCACACGCATTATCGCC  
AAGATTCATCTACCTTACAATGATAATGAAAAGACAAAAGATAACGTGCACGTCCATGA  
TATAATAAGCACTCAGTTAAT  
TTTTTGCGTAATTATCTGCGTAACGTTGATGTTAAAAATAACAACTACTCTCACACTCA  
TGGGCGGAGATAAAGGGGGG  
GGGGGGGGGGGGTACAAAGGGCATGTACCCCTTTAGCTAAAAATATTGTAGTGTA  
TTTTCAAAAATATTTAGCTTTT  
TTTTATAATTTGACCCTCTAAGAACTAATTTATAGTGTAGTTTTTAATTTTATGAAAGTGT  
GTCCCTTAAAGCAAAAA  
TTCTGGCTCCCCCATGGTTACACTATACTAACCAATTACCCCCAACTAATCACTCATTC  
ACTTCACATTCCTAATCACA  
CATCTAAGATAGCTCACTGGCACACTTGGTCAACTTGTAATCTTTGAACCTTCCTAGAA  
TGCAGGACTCATGTTACACCT  
TTCACAAACAATATTTACCTATTTTAAATGGACTTAACTTTTCATTAAATAAAGAAAA  
GAAAGCATTAAATTACACCGT  
GTAATTGAACACATTATTTTTTCATATAAATAATACATCTTTGTTAGGCTTCATATGACAAG  
TAACATACTTATAAAATCT  
TGTTTGGTTTTTTTTTACATGAGTTGGGCGGGGGTCTTTCATCGTGCATTACGCACAC  
CTCCTGACTCCTCCAAACCCT  
TTAAATTAGGGTTCCATCTTTTCATTCCCCAAATTTCTGTCAAATCCTAAGATCTGTTTTT  
TTTTTATCCAAAACCTAAG

>CsCML21

AATGCATACAACCTATGTTGGAATGTGGTTTAAATAGACCTAAGAATCCTAATTGTAAACC  
GACTAGAAGTAATAGTTTCC  
TAAGTGCCTACTAATCCTAATTAACAAATAAAAGATAAACATAAGAAAAGATTCCTAAT  
AAAACATAAAAAATCTTATGTG  
ACTTGGATTCTTGCTCTCCAAGTTTCCTATTCCTTGTTTCCCAAGTTCAAATCTGTTTC  
CATATTATCCACTTCATCAC  
AAATTCAACTTCAAAATTAACCATGACCCAAAAATACGAAAATGATACATCTTCTTACA  
TTTTGTTTCATACATATCCTCC  
TACTCATGTTACTGGTGCATATGAAAGAGAGAAAATGAATTTACGTATCATCTTCATGT  
ATGGGTAGGAGGATAAGTAG  
GAAGAAAATGTAGGAAAATATAACAGTGTTTTTCAAAAATAACTAAATTGCAAGTATAT  
AAACAATGTTTTTGAGTTT  
TAAAAAGAAAAAATAAATAATATGTAGCCAGAAAAGAAAAAAGTATACTTAGATAT  
CTAAAGGAAAAAGACAAGAAGT  
GTAGGGTTATTGATAGGTTCTGCCTCGACAGGAAGTGTTTTGATATCGGTGATTTGGGG  
CAATCTACTGTCGAAGTAGAC  
ATTGAGATAACAGGTCTTAATCGTGATCTGGAAGGGATTGTTCTAAGGGAGGTCGGCG  
ACAAATGGGAATGGAAAGGAAG  
GAACCATAAAGCTTTTAGCGTTAAAGGGGTGAAAGAATTTATCCAAAGCCATTACGAC  
TACAGTAGGAGTTTCGTGTTCA  
AGTGGTCGAAATGGATTCCGAAAAAATAAATATTTTCATGTGGAGAGTAGGGATGGAT

AGAATCCCCACATGTATGGCC  
CTTAGTTCCAGAACTGTTTTTTCGGTTCAGTGACTTGCGTCCTTTGTGGCATTGCGGA  
TGAATCTGTTGATCACATGTT  
TTGCTCTTGTGAACTGGCCATGGAAGTTTGGTATTGAATAGGCTGTTGGATCAAATCTC  
CCCCTCTTTACATGTTCTCGG  
TTCTTGATATCTTTGACATGCACAGGTGGGGAAATATGGATAAGAAAAAAGGAAGAT  
TGTTAAAGGGATCATCTTCATT  
ACGTGTTGGTATATTTGGAAAGCTAGGAATTCGAAGAAGTTCGACAATGGATCCATCGA  
TGTCAAAAGAATTGTCCTAGA  
TATTAAGGGTTTCGGTTTTTTGTGTTACAAAAACCGTGAGGGGAATCCTAAGTTAAATT  
GGGGTAATTGGTGTAAGTTTG  
AGTTGATGTAATTGTGTTGCTCTCTTGTGCCCCCTTCGTTAGTTGTCGTTGGTTGGGCGT  
GTTGTGAATAATAGTAACT  
TTCGAAAAAAAAAAAAAGATATCTAATCTTAATAAGTGGGATTAAATGTATGCTTACTTT  
TTAACTAAATTTTGAGAA  
CTAATTTATAAGTCTGTGTATAAATGCGTCAATAAAATGTTACTCCGTATCACACAAGTT  
TAGACATGGAAAATGATTAA  
AAGGATTAAACATGTGATTATTTTTGTGTCTAAATAGATGCGAAAGTGGTTTAATGATTT  
GTGAAATTGTAACTTTCACC  
AACACTTTTTATGCATGTTTAGGCATATAGACATAAACTATGTATACTTCTAGCTCTTTC  
AATCATCTATTCGTCCAC  
GATGGAAAAAACTCAAACACAAGAATATAAAATATAAAATAGACAAGACAGATGTCAT  
TCCATGATTGGTTGAAACAACG  
TCACCCAAATAACCACGTCTCATAATCTCACTTTTCACTTCCATTAATCTTCACTTCTT  
CTCTAGAAAACAAACAGATC  
TACCAACACAAACACAACATAAAAAAACACTTCTTAACCCCTTCCTTCCTACATTAAAA  
AACACAACACCCAAACACCAT  
CTCTTCAAAACCTTAAATTAAATCATCAAACAAAAACAACATTAAACACAGTTGT  
TGTTGTTGTTGTGTTTAATGCA  
>CsCML22  
CCCAAATATGGAAGTACACATTTTGGCCCTTCCAAAAAATATTGAAGCTCCGCCACTG  
CACGCCGCCTTTTCTAAAAAG  
TTTTACCCTATTTGTGTCAGTGTGGCGCCGTGGCGGTAGGCTCAAACCCACAGGATTAG  
TCGGCCAGACAATCAGAAATC  
ATCGTTAAGAAAATTTGACAAGTCATTGCTTTTTAGACCGAACTTTATGATGATCAAGA  
GTAAACACAGACAACAAAGAA  
TGTTGGCTACGCTTGATTGTCTATAAAATCCTCCAAACTAAGCCTACTTAAGCTTCAACT  
TAGATTTGGAAATTGGGAAA  
GACGTTTTATTCAAGTCTTTTCCGATATCCAAAATCATAAAATAGGATTTAAATTTTGGT  
ATAAATGTGATCAAGTCTTC  
ATCATTTAGGTGCCACAGGGGCCACCAATAATGTGATCAAGGTCAAATAGGATTTAAAT  
TTTCGGTATATACTACAGTAT  
GCAACTAGGCACAAATACATTCAATGACTCCTTGCCAGAGTACAAAACATCATACTTTT  
GTCTAAAATTGCATCATCATT

TAACATTTAACAGTATATCTTTATGATACCTTGACGACTGATATTGCTAAAACGTTGATAT  
AATGTTATAGCTGTGCTGT  
ATCCTTACACTTATCGCAGAACTTTATCTATACAAAACCTTTTCATATAAACAGTAAGT  
GTCTATGTAAATGCTAAAAC  
CGAATAAAGTATGGCAGGGAGAACTAGAGAAGAGAATATGCTTATACGGAAAACACCT  
CAGTATGACTTTTTGATACCTT  
ATTCCGCTTACTACGTAACGAGGAAACAATTAAAGTCTAGAAAATTATATTTCTGAAAA  
TTTGTGTACTIONTTTTACTTAGT  
TATAAGATTTATTTTACAGATATAAAATTATGATGAGTCGTCCTTTGTAACTTGAATAATAA  
AGAAATATAGAGTGGAAC  
CGTGTATCGAGTAGTTGACCTTGATAGCACATTATTGGCTTAATTAAATCGAGTTTATAG  
TAAATGAACAGAAACATGTA  
TTGTCTAGTTGGCATTAGTATAATGATGCTGAAAGTGTAACCTACTCACATGATTTAGG  
CATAACCGCGTGATTTACCT  
CTTAGGTACTGTACGTCTAATATATATGAAACCGGTGTGATTTGGAGTTAACCTTATTTT  
GTAACAAATTAATGTTTAAA  
AAGGTCAATGTGGATTAATTTACTGTCAAGAAAAGATTTTGATCTAGTTTGGACTTTGG  
ATCTAGCTAGGAGATTGATGA  
ATATACAATTCGTCAAGCTCAAGAAAGTCATCGTATTATTATAAACTTCAATAATTGAA  
AACTGATTCAAAGTATTAG  
TACCTTGTATATATTATAATCTACGTGACAAGTGATCTTTTAAGGATTATAAAATGGGATT  
GACAGATTCACAGAACATG  
ACAGTTCCTGATCTGATTTTCATCAGCCATAAGCACACTAATCATATAAAATCAACCTTGT  
TTTCTCTTATTGCTTGACAC  
CATTTTCAAACACAGGTCTGTTTATCCATATTCATATTCTTCTGCAATTTGTTATATTCATG  
CAAGTATGTGTGTCGTGT  
GTAGATAGATTTATTAAGTCAACGCTTTTTTCATAGCTTTAACGATGCAATCATGATCATGT  
ATTTCTGTTTATGTATATT  
GTTGTCTTATATCATTTTGATTTATGAAATATTGTTAACGTGCTTTCAGTTGAAGTGCGTT  
CGAGGGTTGAAATGAGCTT  
TCTTTTGGATATTTGCTAAAAATTATCCATTTTGACCCAAAAGAGCTAGTTATAACTGCC  
AAATGCCAAAAAGAATACAA  
AATATCGAGCTTTTTTTTTTTTTTTTTTTTTTAAATAACAAGAATGTGAAAGATTCATAC  
TGAAACTTCCTTTTTGTGA  
TTGATTTACAGATATTTATCTGCATTTTGTCTTGTCTTGCTGTGTTTATAGGTGCATACA  
CATTGGTAGTTGACCAGCC  
>CsCML23  
GAATAAACCCACGATGGTAAAAGGATAAGTTGACCTACTAACTAACTTGTTGAGTAAG  
AGGGTTGCAAACCCATCAATAC  
TGGATCACGCATCCTTGTTAAACACCTTGTTCTCAAGACGTTGGAATAAGATATGTGCG  
CATCCACGACGGTTGGGCAG  
TAATGCACACGTGCACGTTTAAACAACCTGGGGAACCAAGATACTTGCTTCCTTAATAAGA  
TATTTACAGCACGCTGAATAT  
CATTACATACACGGTTATGATTAAATACTTAGAATTATTTTCCGAAGTATACTATAATTTTC

ATACACGACTATGAATTT  
CCTACATTGGCAGACAGATATGTATACATTACAAATGCCTACAAGCAACAAGCAAAAAA  
GAAATTTTTATTATAACTAC  
GAGTTATTACAAACGATATCAAACATATCCGCTACAAGCTACTACAACGCCTAAGTGAC  
GAAGTGCCAACATGACTTGTC  
GCTTCTTTAACTTCGCTGATGCTCTTCAACACATCTGAATCATTAGGCGACACGGTGGC  
CACACTGACTGGCATTCCATC  
AGACCTTGGCAAGTGAGCCGCACCAAGTCCACACAAAATGGCCTTACCTGCAATACCT  
TTTTTCTTGGCAAGACGGGTGG  
CATGCGCTTCCAAGACCTCCTTTAGAGGTACCTCTTTCTCCAATGCAAAGGGATTCTGA  
CTATCCCTAGGACGCGCAAAG  
ACGGGTACTTGGAGCTGCGACTCATGGGGTTTCAAAAAATAATCCGGCTGTGTGTGCGG  
CATCCTCAGCACGATGACGTGC  
CAATGTCAACCCGGCCATCATAACACTTATCGGATAATCTTGGTCGCGCTCAAGCTCCG  
AAATCATTGGGAGCTCTAGGT  
CTTTCATTTTTTGCATGGCAGCGACCAAATGATCATAGGATTCAGCATTGTAACCCGGTA  
CCTTATCAACAGGTGCTTTC  
AACAGTTTTTGCTTCATGGAGTTGTTCCACTGCCTCTGACTTACCACGCTCTAAAGCGCA  
CTGCACAACCTCCCCAAATGC  
ATTCACTACCTCTGTTGACTCTAGGGTACTAAGCGCAGCCAATCGGAGACCGTGGCCTA  
TGAGCCACCTGCGTTCAGCTA  
TCACTGACATAAGCTGCGGATACAATTCTTCATCATACTCGATGCTCAGCTTACGCAGCT  
TTGCCTCATGTACCTCCAAG  
GACCAGCTCACAGTATTCCCCAGCTCCCCCAACTGCGCAAACAACTTTCTTTACCCT  
GTTCCAAATGTTTTAGTGCCCA  
GCAGCACGCAGACTTATACCTGGCAGCATCGGCACGCTCTTGATTCATTTGGCACATTA  
GCGCCATTTTATCCTCGACCT  
GTTTTTGCGCATATGCGCTGAGAACAGTAGCCTCTGCACGGGCGCTATCCAGTTGCGTT  
TGGGTGCTTGAAAGCTGCGCC  
TCCAACAGAGCTATTGCTTGGTCCTTCTTTGAGCTTTGGTCCTCTCTACCAGTTACTTG  
ATCTTTCAGCTTCACAATCAA  
CGAAGCCTGATGGGCGGAGACTTGAACCAATTCTTCAACTAATTGATCCAGGGGCACG  
TCTGCATCAGCTTGGTTTTTCAT  
TCTCCTGGCTCGGCGGCTCAGAATGCGCTGACTGTGCTGGACTAGCCTTGGGAGGTAA  
TTTATCGTATCATTAGAAGATA  
ATTTATCATATTTTCAGTAACTATCAACCATATTATTAATACTATTATTTAAAAAAAATAA  
AAATAAAATAGAAATTAT  
GTTATAAAACCCGTCAACGGTCCTCTCCACATTTTGATCGATCCATTAATTGTGGAGAA  
GGTAACTACCTTATTCCTAA  
ATCCATTTGTCAGAAACACAAACATCCTATGATTTTCATCTAACTAGATTTATCATTTTGTT  
CTCTTTTTTCGAATGTTTGT  
TGGATTGGTTCATTTGTTTCATGAAACATTAGAACACACAAACAAATATTAATCTCCATAC  
ACGAAAAAAAAAAAAAAAAAAAA  
>CsCML24

GGTAACTAGATTATAAATCCCAACAATATCCGACTCACCCGGAGCAACAATAACATCA  
CCCAGAGCAACATTAACACAG  
GTAAACTACCATGCGCTATATACTATCCGTTACTCACGTCGTGTTTGATTTTAGGCGTTC  
CTTATGCTTTCCACTTGACC  
TCCATAATCACCTAAACACATAATATCATTCTATCATCATTAGAATCACAACTTCATCTTT  
AAGTACTATACTTAATTAC  
TTGAAGCCTTATTCCAAACACTCATTTGACATTTGAACTAAACGTAATCATAATCATAAT  
CTTAGAGCATGAACTTTACT  
TTCCATAACATAATTATCCTTAAATATAATCATAAAACATACTAATTATGTCTAGAATCATC  
AATTATATATGTAACATC  
ATAACTATGATTATGTAACATAATAACTATGATTAAAATCATCATTTATACACGTATCATCC  
ATAACATAATCATCCTTA  
AATACATTTGCATTGTTTATGATTTTGTA AAAATTAGGAAGAAGAGCTAAAAAGTCGAA  
TGAAGTATCACGTGACAATCA  
CGTGGGTTCACAACTATATATATTTGTGCATGCTAAGACCAAAGAGTAGGCAAAAATTA  
ACGGGCTTCATCTAAATACAC  
ACAAC TTTTTTACGAGTCTCCGCATTTATAATTTCTGTCCCGGCTCCGTCGTCCACCCC  
ATCTGCATCTCTACGATCGG  
GCGGCTTCTTTCATCCCCGCCGGTATTCAATCTATAGAATTAATACGTATTCAATTTTAT  
ATATTAGATTGCTATATGT  
TCATCGTCCTTGTAATGTTAATTAATTATGGTTTTATTTGGTCGTGCATTGAATTGGATAT  
CAACATGCAATGGATTCAT  
GAGCATGTACGTTGTTGTTTTGTAATTGTTACTATCACCATATATTGTTGTGATTTTGTTT  
ATTTGAATGTTTGTGTTTT  
GATGTTTTTTTTGGATGCATGCGCGTTGTGAAAACGATGAAGGTTATTGCACGGATCTGT  
GAGAATAATGAAATGGCTAAT  
GATTCGTGAAATGTTGATAATTGGCAATGCTCACGGTTCTAGCTAGCTACACGAGCTAC  
CACCCGCACGACAATTAATAT  
GTGAATCGAAAGTGTTATGCTCAAACATATAACTATCTAAGTAGCAATAAGCTTATTTAC  
TACTCTCAGATATTGATGTA  
CTCTCTTATCCAAGGCTATAGCTGAGCTAACAGAGGTATATTGAAAGAATAAAAAACA  
CCATAGTATTGAATGTAAAAA  
AATGACAGATCAAAGATATATCATCAACTATTAAAAGAAAAAAACGCGCAATATTCTAA  
TGATCTAGCTTCGATCAGTGT  
TAACACATGCGGAGTATCTAGTATATAAAATCATATTGTGAACATTTTTTTGTTTAAAGTA  
ATTTTTGAGGTTCCAAATA  
TATAAAGATACGTAGTATGTATATTCTGAAGCCTCCAAAACGTTGAGTCTCTATGCGGAT  
TCACACCTTGAACACCTCAT  
ACGGATCAATTTTTATCGTGTAGTAAAAAGTTCATATTTGTTGTTAGGGGAGAAAACAG  
TTTAGATTAATCTGTTCCCTAT  
GCTTGAAGCTTGATCAATTTTTCTTTTGTGTCCTTCTCGTATAAAACATTCTATTTTACT  
TCAATGTAGACCTCTTTAG  
TGTGCAGTTGTAAGAACGATGAATATCAATTGTTGATGCTTCAACTGACTATTTGTATTA  
TCTTGTAGCTCTCATACCCG

CATAACTTTACAAGTCATTTAGAATGGATGTTAATTTAATGTAGGATTTTCAGTTTGTCAATT  
TTTTTAATCACTTTAATGA  
ACGTAACGTCTTCTGTTTTGGATAGTGATCGTCTGTCTGATTAGCTTTGTTTTCTTTGTTT  
TTTATTGTGATTCTGTGAAG  
GTTGTGTGAGATGATTTTGGTATTAAACAGCAGTGAATGCTTGCGATGCTTGTAATCC  
TGCACCGCCCTTCCAGTCTCA  
>CsCML25  
TAAAGAGAAACAGACAATAAACCAGAAAAACAGTAGAAAAAACTAACCAAACA  
GATAAGCAAACAGCAAACAAATTA  
CTCAATCAACCACAAACAACAATCCTCAACTTCCAAGACTGCCCAAAAACCTATCCTC  
CAGCAATCTAGACTCAATAAAT  
AAAAAACTAAAACAATAGCTAAACTCTCACACCCAAAACTAACTTGGATCAAGCCAAG  
TGGACTAGGGTTGGCCAAAGCA  
GGTATTCGTACCACTCACGATGGTAGATCAAGAAGTTAACCAGCACGTTTGCACCCACT  
TTGACTCAAACTAGTTATCT  
TAAAGGAGAAATTTGACTTGCAGTGCTTTAAACGAGTTGCAGCGGAAGAAACAATTAG  
TTCTTCTAGATTCACTTAGTCT  
AGAATAACCAATCAAAGAAACAGCCCAGAAATCTACAAAACCACCAGATCTTCGAAA  
AAACCCTAAATCCAAAATTAGGG  
TTTCAAAGAAAACCAACCTAGAACCAACAATAAACCACCAAATTCTTCGATCAATCGT  
CACCAAAACCACTGGATCGTAC  
CAAAAACAAGAATCCCCAACTCTAGGGTTTCAAGAAAAAACCTGGATCTTCAATTGA  
ACTCCTAAATCTTCGATTAAAC  
CAACAATCAACAAGATTCAACAATTTAATCGTTGAATCAACAACCTCTAAACCAAGATC  
GATCAATAAACCAAGAAACCAC  
CAAAAACCAACTAATCAGAACCTAGGGCTCTAATACCATGTGAAAATGGTACCAAAAC  
AACACAAGTATCTAATCACCCA  
ACCAACCACCTTTGGTGATCAACTTTTATTATAACAATATACACAGTAGACTAGTCCCT  
AGCACATGTGCTAGCCAAAC  
AAGATACAAAGAAAACCTGATAGTCCCCAACTGGATGTTATCACTACAAATCAACTCA  
CATTTACAAAACCCAGAAACCA  
GTAGATCAAGATGACCTAAACTAACCAAAAAATATACTAAAAACTGAGAGTACAAAGA  
CTCAAGAATATGAGAGCACTAG  
AGTGAATTTGATGTGATGAAAACCTGTATCATGAATAAGTGAGAAACCCTAGCTGTGAT  
GATAGCTTTTATAGCACCAAA  
TTTCACTTCAAACCTGCACATGATAAACTTACAAAAACAACATCAAACTTATTAAGT  
GTAAAGTTAGTTATAAAATAA  
TTTCATAACAACCCCTGAAGTATCATAAGCTTGCTGAAGTGCTTTATACATTTAACAAGG  
TTCAACTTGTCGATGCATCA  
GTGATCATCAAATTACGAGAACCAAATATCATTTACTATAGCCTAGTGTCGTGTAACATT  
CGTTTTTCTTTTAAACTGTG  
TCTTAATTTCATTTAGAAATCACATCATGTTTTACATCAAAAGGTTTTCTCCCTTCTTTTT  
GTTACTCACCCGCTTCTCT  
TATACGAAGCATGAGGCTCATAAAATTAAATATGGGATGTCAATATCCAGTCTATTTTAA

TCTCTACTCTTACTTAGAAA  
AATATATGACTTTCCAACATTTTAAAGATAGATATTCTAGTACCTTCTAAGACGTGAAGAG  
CCATTACAAATTTACAATAA  
GATTTTTTCACGACTTAAATATTCTAAAATGACGTACACCAGCCGTACCGAATAACAAGA  
AAACGTTGAAGACTTTTCGTC  
TAGAACTCTAACTGCATTTCCCTAGCAGTTTCTAAATTTCAATGGTAAACTGTACGGCAG  
CTCCTACATTATATAAGTTCT  
TGCTTTGTCAACACGCGCAAAAAACACGGACCAACCAATTTATATAACTAACTCTTCGC  
TCTATAGTCTAGAAATAAACA  
AAGTACTGATATATATATACTCCAATTTCTCATAAAGGAGGCTCATTACCGGTTTAACTTT  
CTACTTTTCCATTCCTTTA  
CATACATAAATAGCTATACAAACACATTAACACTTTACTCACACATATTCGGTGTA  
TTGCGAGTAAACAACCTTTT  
>CsCML26  
TTACGCTAACAAAAACAACAAACAATAATTATAAGTCATGCCCGCCCATTGGGCGG  
GCTTCGAATACTAGTATGTATG  
TATATATATATATATATATATATATATATATATATATATATATATATATATATATATAT  
ATCCAAACTTT  
TGTAATTACATCATCATGTTCTTTCATCAATCGAGGCCAAAAATATATATAAACAATACA  
ATTATGATGAATATCAGAGA  
TAAATAATGGTTTTTTGAATTTAAAATCAGTATAATTATAATTTAATTGATTTTATATGAGAA  
TTTAAAAGTTCGGGAATT  
TCTATCGTTAAGGTCTGTTGGAACCTCTCGAGAAGGTTCCAACCTGCACTGTCAACGAGA  
AACTGAAATCAAGCGCAAGCAT  
CTTCGTTTCCCTAGAACCCTATTAGGTAATTTTAAAGTGATATTGGTGTAATTACAAAAGTT  
TAAGAAGGTCATTGATGTAA  
TTATAAAAATGGGAAGAATATTTATGTAAATGAAAATGATATTTATGTAATATTGAACTTT  
ATCAAAGATATACATGTAA  
TTCAACATTTGTTTATTTGATTTTTAAAGAATTTGTGATCTCTATTAATCTCATCTATCTTA  
TAGTACTAGCTATTGTTC  
CCTTGCAATTTTTTTTTCAAAGTATATTTTTATTTTCATGTAAAAATCAATTTGAATATAAGA  
GGTAATGTTGAGGTTTTTG  
TGAGTGGA AAAAATGAGTCATCTTATTTAAGACCTCTAATTTCTTACAAAATAAGTTTTTC  
CTTCACAACAAACTCAACAT  
GACCTCTCATGTTCAAATAAAACATGAGAGGATCTTATTAATTTGTTTATAATCACCCGT  
TTTATCTAAAAGGAGAAAAT  
GCATTTGTTTGAAACTTAAAAACTTAAAAATTGAGTAATATAGTTAAACCAAAAACTTA  
ACTAAAATTTAAAATACTAGT  
GTAATTTTCGTCACTCTCCTTCATACTAAATGTAAATGGCTAATTACTTAAAAAGTCATC  
AAACTTGACACTTTTTGTCT  
TTGTGTGTACTGAACTTTTTTTTTTCTCATTGAGTGTATTGAACTTCAAATTCGATCATT  
GTGTGTATTTTGTGACCAT  
TTTACCCTTACTTTTTTTTAAATTTCAAAGGGTAAAATGGTCATTTTACATGGCTGAATAG  
TCACAAAATAAACACAATTA



TCGAAATTTGAAAGTTCAGTATACATAATGAAAAAAAAAAAAAGGTAAGTGACACAAT  
AACAAAAAGTGTCAAGTTCGAT  
GATTTTTTAAGTAATTAGCCCAAATGTAAATGGTTATAAACTTGAACATGAATAAGGTT  
TTTAATTATTTATATACAAT  
CCGTTTTTCACCTATTATCAGTTTAAATTTTGTGACTTTGTGATTGGGGTGAGTTTTCCAC  
ACCCTCTCATAATGAGGGTT  
TGCAATGATTGGACCCATCATCAGATTGTACGGTATGCATCACGGGTTGTACTGTTTGAT  
TAAACCTTTATGATGTGACA  
ATATAAAGAGGGTATGTATAGGGTATTCGACTATCTAAAATTTTAGGATACACATGTGGT  
ACCTTCCAGGACGTCAAAAG  
CCAATAAGATTTGTTACGACTTAAATATTCTTAAATGACGTGCACCGGCCTTACTGAAT  
AAGAAAAAACGTTGAATAC  
TTGTTGGTCTAGAACTCCAATTGTACAAATTAAGAGGGTGCATTTCTAGTAGTTTCTA  
AATTTCAATGGTAAACTGTAC  
GGCACCTCGTATTACAATTATCGTTTTGTCAACACGCGCAAAACACATGGACTTTTAGT  
TGATTATCATCGTTTAAAGTCC  
AAAAATATGAGAAGTATATAAATAGCTCAAATGTGTACAAAGGAGGCTCATTACCGGT  
TTAACTTCCAATATCTTACAT  
ATATAAATAGCTATACAAACACATTTACCAACACTAACTTACTCACACATATTCGGTGTA  
TTGCGAGTAAACAACCTTA

>CsCML27

TTATGTGTTTATTGGAAGTAAATGCGAGTTGCAAACATTTTCTTGGACCTGCAACTCTTC  
TTTTAATTTGCTTATGTGTT  
GACTAGCGAAGGGTAGATATGTGGTAGATATTGACTTAGGCTAGGGTAGCAATCCTTTG  
CTATAATTACGATACCTAGCT  
AAGAATAGATATCTACTTCCGACCTAGACCATGGTAGCATCGAATTATGCTATGCTATGG  
CCGTGTTACCTGGCTAGAGT  
CGTAGGGCCCTACTGAGATCTCGATGCGTTATTGGAAGTAATATTGATGGAATGTTATT  
GGAATATTGTTGGAATGTTG  
TTTGTGGAATGTATAGCATATATATATGCCTTAGTTCCACATAGCAAATAAACTCTATCA  
GGTCCATTACTAATTTTGT  
GATTAACTATATGAACTACCCGCGTAAGCTGACCTTTTTAGCATGTGTTCTCAGGTTT  
AAGGCGACAACTCACTATTT  
GAAGACGCTTGGCAATGGGCATGGTCATAGGCGACTCTGATAAACAATTGGGACCGCT  
TTGAGTTTCTTTATGGGCCAAT  
TTCCGCACTATTTTCATATAAAGAAAACCTTAATGTTTTTGATAATGAATTTTATTCTAAAT  
GAATGAAATAATAACCAT  
CTTTGTACCTTATGTTTTGATACCGATATGGTAGCACCCCAATGCATGTATGCTTTTGCTG  
GACCCTATTTTCGGGGTGT  
TACAGTTTTACTCTATGAAACGTTAGAGTACAACCTTTTTTTGATGACCATGTCAAAGA  
ACAAAACCTCTACAATGTGGAG  
ATATGGTAAGTTTTTTGCTTATAATCGTTATCAATGATATGTTTCGTACGATTGCTTAAGGT  
ATTTTCTTTTAGGTAAGA  
TAATGTTAACAGTGTTTTGTTATGTGTTTCAACAGCTGGTCGATCGGGTCAGTTTAGCAT

GAGGTTTCATCACAATGGTA  
TTTTCAGAACTGATCAGGTAGAATATACGAAGGAGGTAAGGAATGTATTGTTGTTTAT  
GTTGATATGAATGAGGTCTCT  
GTTGATGAAATAGATGCTCTTATGATCCAAATTGGTTATGCTAAAGGACAAACCATTAC  
TACTGCTTTGTTAAACCTGG  
TAGTACACTGGATGATGGGTTGTATAGCTTCCATAAGCCTCTAAATCTTAAGTTTTTGAA  
AATATATTGTCAAAGAGCAT  
AAGTTGATAGATGTTTATGTTAAAATATGTAAGACAAGATTAGAGTTGAATGAAATGTC  
CCCGTTAAGACTGTTTTTAGA  
GAAATTGATGAAGAAAGTAGAAAAGTAGCTAGTGATGCAATCCAATTGTGTTATAGAC  
GATTGGTTTTAGATGACCTTGA  
TGAGCTGAAAGTAGGAGCATTGAGTGAACCGACCCTAGTTTCCTTTATCATTTTAGAC  
TCATTTTGAGAATATTTGTT  
TTAATATTTCAATTTCTTTTAGACATGTTGGATTATGTTTTTCTTTTGAAGTCATTCATTTA  
TATGACTTGGTATTTTAT  
TTAATATGACTTCCGTCTGCGTTTATATGCTTTGTATGATACCATAGTATGACATTTTGAAT  
CGTGTCAAGGTTGGCGTGT  
TACACCTTTAGTGTTACTGTGTTAGGAATTAAAGTTACCTATGCAATATGCATCCTTCAC  
GAATCCGAATTTACTTTTTC  
ATAAATAAACTATATATATCTACCTCATGCAAAAACAAATGGAAAAACGGTTCTAAAG  
GTCGCGACAATATACACAATA  
TAACTTCAAAAGTCACGAACGAAGTTGCCATGCAAATTCCTTGTGAACCAAACCTCAC  
GCAATTTGCTCTCGTTACACCT  
TCTAGGAAATTTCCATTAGCATTTTCTTCCAACATTATATAACTGTTTTCAAAATCATGT  
CTTGTCCCAAGTGTCTTTG  
TTTATGTATATATAGGTATCAACGTTAGGTCATTCCATTCTTAAAATTTAGTAGAAGCTTT  
ATTATATCTTAGCACTATA

>CsCML28

CAAGTTAGAGACTTATGAGCCATTGGATTTAATCCAATGGCTCAAATCAAAAGAACTTC  
TTTTGATTTGAACCATTAAT  
TAAATCCAATGGCTCACAATCATCTAACTTGACTCAAGTTGTGTTATGCAACTTGAGAG  
GATCTTGATCCGTCTACTAAA  
CAACAACATTACGTAAGCTTTGCATCTCACAAACGACTTCTAAGTGCACGTGTAACGAT  
ATAGTTAAAGGGCCACTTTTCG  
TGTTTCACTTTGCATAGATAAGTAATTTGACTTTTATTAATTTAATAGTTAATACAACCTAG  
AAGTAACAATGTCAACCCA  
CTTAAAAGTCATATAAAAATGCACACAATGACACAAAGGTAGGAATATATCTGGTAGCG  
CTAATTTGTGACATAATATTG  
TTAATTTAATTCATCAAAATACCTTGTCTAAGTGGACTTGCTTCAGGCGTAGTAAAAAC  
ATGTATGCTCGCACTATATCC  
GATGGGCATTAGCTGTCGATATCTTTTTCTTTCTGTAAATAGACTTGTTTGCAATGTACTA  
AGTCGTACTTCATTATTTT  
GGGAATCCATATTTATCAATTCATGTGCGTATGTTCAATAGACAAGTTATACGTCCTTGA  
CTCTTCAAAATTGTATTTAC

TTTTCAACATTGTGAAACACTAACTTTTACTTGTTGGCCTGTAAATGCAAAAAATTAGA  
AAAAGCTAACATTCTTTTTTC  
AAAACCTTATTCATATGAATAGCTAGTTTTTTTACATGTAAATATGAATAACTTGCATTTAT  
AATATATTAAACCGTTGGA  
GTATTTTTGCATTTTTTCATGATATTACACTAGTGTTTCGTCCCCAAATAACTATCCATCCTA  
TTTTCATGATATTACATTA  
GAGACGTTATTTATTCTCTTTGTCCCCAAATAAATCTTTCTTTTTTAATTTGCATTTTTTCAT  
GATATTAGGTGGTGTCTG  
AATGCAACTTAATTGACTTAATATGAAAAAAGTTAATTTATTAAATCATATAAAAAGTTG  
TTTGTTTTTTAACTTAATCAA  
AATAAATGACTTAAAATAATAAGTGATAAAAGTGAGGTCATCCACATTAAATCATTTGTT  
AATTAATAGGACTTAATAAA  
AAAATTAAACAAACAAGCCCTTACATTAGCGACGTTATTTATTCTCTTCGTCCCCAAATA  
ACTACCCATCTTTCTTTTTA  
ATGTTGTCATAAATTAATTGTTCACTACTAAAGTTAAATAATAAAATTTAATTGAATTTAG  
GATATTATTCTTACTTAAA  
ACTTAAAGTATTATTATGAACATTAAAGGAAAACAATAATTACTTAGTTAAACATAAAA  
CTCATATTCTGTAAAATGTG  
ACAAAAATATAAAATAGTAATCGTCGAGTGTTTTTTGTCAAAGACAACAATTTTGTAA  
TGAAAAAATTAATATCCGTAT  
TGTTATTTAAATAATTAAGTTGTTTATAAGTCTTAATTTATGAAAGTAATGGCTTGTTTGT  
TACAATTTTTGACTGAGTT  
ATGTATATATAATTCTATATAAGAGATGACTTAATATAAACATCTTTTATTTTATCATTTTAT  
ATATTTAGTCAATATTT  
TTTATTAAGTCACAAACAAACGTACAACCTTAAACATGATTTTGAGAGTCCAATTTTGT  
ATATTAAATTTAACTCTAAAT  
TCTTTTACAAAAAGTTAAATTTAAGAAAGTAAATTATACATATCTTCACCCAAAAATAAA  
AATCCCTAAACTACATACCC  
AAACACCCTCTAAATTACAGTTATTTACAACATACCACAACGTTCCACAATAGGCGCGA  
GCACAATATCTCACCTTCCAA  
AAATTAGTTACAACCTACAAAACCGCGTGCAGTCATTCTCACAATCAGTCACCGAACT  
GTCACTCTACCGTGTCTCAATT  
CACGCGTCTTTCTCCCATATAAATACCAACCCCATTCACACATAATAACAATAACCAAAC  
CCTAACCTAATTCTTCACA

>CsCML29

GTATTGGACACACACCTTATACCCTTGAGGTAGTTTATATAATGCATTTTTTTAAAAAA  
AATCGGTTCCAATCGATTAG  
ACCCGCAAAGAACCGAACCGGACTGAGAACCGAACCGGAACAAAGACATGTTACTCG  
GTCCGGTTCTCGGTTATTTGGCC  
ATCCGTTTTTCGGTTCTCGGTTCTTGCGGTTCCGGGTCGGTTCCGTGCGGTTCCGGAAC  
CGCGCTCACCTATTCAAGGG  
TAAACACATGAAATTATTAAGCGACACCTTTTTACTTGTTAGTGACACTTTCTGACGTGT  
CACTAAGTGGCATTCTTGTAG  
TACACAGCTTTCACGTTTCAAGCTATTTGTATTGCATCAATGTGAGGTGGAAAAGAAAA

TGAATTAGATAAGAAACAAGA  
TATAAACTCCTTATAGAATGAAGATAATTAATGATGTAACTACGAAACGCCAGCTAGCT  
TTTAGGATCACATATGAGCT  
CGTCCAAAAGCTTGGATGAAACTATTGGGCCGGTTATCGCATACTTTAGTGATGTCTCT  
ATGTCTCAAATCAGTATCAAG  
TTATCATATGAGCTTGCTCAAGTGGCTAGTCAGGATTTCTTGACCCCAAATCTTATGCTT  
TGGATGGATGACAGAAGTTT  
ATCCATCGGATGGTTTTCAACTCTCGAAAGAAATTCAAGTCAATAGACAACCACCATGT  
TACAAGAGGACCATATGAATT  
CCTTCTCATATGCCCATCACATATGTTCAAGGCATCTTCCTAAAAGTAAGAAATAAAGC  
AATCGATTACTTGGATGGATG  
ACACAAGTTTACCTATCGAATGGTTTTCAACTCTTGAAAGAAATTCAAGTCTTTACAAG  
AGGATCAACTGAATTCGTTCT  
CATATGCCCATTACATATGTTCAAGGCATCTTCCTAAAAGTAGAAATACAGTATGGTGAA  
TATACCCGTTCTTTGTTCAA  
AAAAAAAAAAGTATCTATATATATACCAATTCTTTTTTCTTTTTAAAAAATACTTGTTCTA  
TATGCGTGCTAATCTATCT  
AAATCGTGTAATCCGTGTTATATGTAGTTGCATTAAAAAACTATATCTTGTAGAGCAAGA  
ATCTAGCTTGTGATGATCAA  
GTTCTTGAGTTTCCGCCACGATGATCAAGTTCTTGAGTTTCCGCCACGGAAGTGTTC  
TAGATATATATGATTTCAAAT  
ATAGCGATAGTATAGTGGTAAAGGAACATGTTCTTTAATTTCAATTTCAAGTTTGGCTTA  
GATTC AAGCATAAATTGATT  
TGTACTTTTTATTTGATTCTTAACTGTCAAGTTTGGGTTCGATGCCAACATAAATTAATTC  
GTTCCATGTAAAACCGACT  
AAAGGTGAAGTTGGGTCAATCAACTCTCGATCTTGTGGAGTCATGGAGGTTACAAATT  
TTGGGGATAATAACAAAAAATT  
GTATATTAAGTTGTCCATTTTTGTTGTTCTGTTTATCATTTTTTTTTTAATTAACACAAAT  
ATCTCAAATTTCAACTTT  
TGAGAGTATTTTATAACCATTTCTATCCTTACGTTTTTTAACCACCCTGTTAACATCAAAG  
GGTAATTGTACACGTACATA  
ATATACACAAAGGTCGAAATTTGAAAGGTTTGTGTTTCGATCGAAAAAAGAAAGGCTA  
CACAAAATAACAAAAAATGGAC  
AAGTTAGATAATTTTTATTTTCTTATTATCCCAAAGTTTAAATATTTTACAGAGAACCCAA  
TATATCCTTTTGGTACTGC  
AAAGTGGTGAAGATAGACCGGAATTTGAGGAGAATCTCGATTTCACTGATATGTACGA  
ACCAGTTAGTATGAAATAAAGA  
TAAAAATTTACAAAAAAATCTTAAATAGCTGCAGTTTGACGAGCTTTCTTCCTAGCAA  
TATGCATGTGAATTGATGTGA  
GTGCTTACAATCAAATGGTTGTGGCTTGAAGTCTCAACTTGGATAAGTGTGTGGGAGT  
GAGTTTGTCTTTAAAATATTGA  
>CsCML30  
ACCGTCTTTACCGATAAACTCATCTACCACTTTTTCCACACACACACAACCTTTCCAAT  
GGCAGATTTCCCATTTTAAA

CAAACCTCATGGAGGTGGCTGATTCGCCAAATCTTAATGAACGGATGGCTATCTGGTTTG  
AAGATGAGGCTGCCCAAGAAG  
GGATTCTAAGGAAGCTACTTCTTCAGTGCTGCCAGCATCTGAAGACAGGAATCATCAA  
CCGTAGGGAGCTGATACAAGAG  
AATCAAGCTCTGGGACCTCGTGGAATTGCGCTGAACAAAATCCAGTCTAGGCACACAA  
ACCAACTTGCCCAACTCATACA  
GATTGTTGGTCAAACAGATGAAGGTATTCGGTTCAACCAAGAGTTTGTTAAGAAAATG  
GCTGAACATAATGCCTGAATTT  
TTGGTTTTCCATGGGGTAGATAAAGGCGTCTTTTGGGTGATAGTTTTGCTAAAAATGGT  
ATGTAAATTAGATTTGATGTA  
GTTGGTTATGATGTTTAAACAGACTTTATTAATGATAAAATATCATTTGGGTTATGTGTTGT  
TTAATCTGTTCTTGTATTG  
TGATATTGGGTGTATTTTAGTGCTTTTAGTATCAACAAAACCAAACATCCCCTTATATCA  
GCAAAACCAAACAGGCCCTT  
GTATCATCAAAACCAAACAGGACCTTGTATCAGCAAAAGTTTAATCAGTAGAACCAAA  
CACCCCCTTGATCCGCAAAAG  
CAAAGGCAATGGTTTTAAAAAGATGTGGTGAAAATGCAAATACTTTGGCACTAAATCAT  
AATGTATCAAATAAAACATCCG  
CTTGTATCAGCTAAACCAAACGACCCCTTTTATCAGCAACAATTGTTACAGCAAAACCA  
AACACCCCCCTTTCAGAAAAA  
ATACAGGCAGTGGTTTTCAAATACGGGTTCAAATGCAAACGCTTTAGCATTAACAA  
CAATGTATTGACAATGGTGTAT  
TGTAACATCTTGAATTTTGACTTACCAAAGTCAAACAACTTATGAAAACCAACAAATT  
GTAACCTTACTTGGGTAAGTGA  
AACCTATTAAGAAATGCAAACGATTTCAAACACAATTACTTAAATAAGATCACAAAAC  
TTTATTCATCGATTACATGTT  
CTCAAGAACTACAAATGTTTACAATCTACTAAACATACACTTAGCTAGACCCACAATTC  
TCCCTATCATCGTTTTTCCTTC  
TTTTCCTTCCTTTCCTTAAGATATTTAAACAAAATTTCCAGTTCTGTAATCCTTTCTCCCA  
AATCGTTAAACTTTGATAA  
CAAGATGTCATCCTCTTCCTTCTCCTTCTTAACACCCAACCGCTTTTCATTTGCGCAGTC  
TGCTTTCCTCAACGAACTCA  
ACAAACCCTTCCCCTTATCGTTTTGTGCCATTATTGTTTTTCTCTTTGCTTTGGGAAGAA  
TGTGTGTTGATTGTATTTA  
GGGTTCAAGTCTTGCTCGTTCATACATATGGTTGAAGGTCGGGTACATTTTAACTAGGTT  
GGGTAAAAAAAAGTGAATGG  
TCTATAATACCCTCGAAGGAAATCGGTTTGACTGTCCCAATTCTGGTCAAGGGACGAAT  
CTGGCATTTAATGGCCACTGT  
TTGGACCCGTGGCGATGAAAAGGGCGTGGTTCGTCTATCGCGATCCTCCAAGACAAG  
TTTAGGGACCAACGGTGTATTT  
TAGTCAAAAAATTATTAATACCCAAACCCACATCCAAACCTACCAACCTGCCCCAAAAC  
CCGTCCCAACTGGTTCGAGTT  
TCGGTTTCCCATCGGTTTCGGATGCTTTTGCCATCCTTAGATATGATTCTGGTTATTGCC  
GGATCTTAACATCCAAATG

ATAAGGAAAATACAAAGAATATTAAGCACAAAAGAAAGTGCAACCCACGCCAACTC  
CCTGTGCCCCGTGTATATATATG  
CAAAGCCTCATAGTGATGCAAAGCACCTTCTCACACTATTAACACAAGGCCTTCTATTT  
CCTAATATCTTTTTGTTGAAT  
>CsCML31  
GGGTCTAATCTGCGATCGGCAGTAGTCATGTTAGACGGGACATTATCAAGGCCAAAAG  
CGCCTTTGGAAAGAAGATGATC  
TATTATCTGTCATCACTTTAATTCTTATAGTTTTGATGTTTTTCGTTTCAGTTGGTATATTGT  
AGAGATTTATGTATTTCA  
TAACGATTTCTTTTAGCTCAGCTGAATTAATATATGCTTGTAGTATTAATGATAATCGAAT  
GCTTATTTAAGTCATTAAA  
CAGCTAAAAAATATTAAAAATAAATAAATAAACAATCAAAAAAGAGGGGAAAGGGG  
ACAAATTTACAAAACCTTACCCTA  
AAAAATAAAGAAAGTAACAAATAGGCCCTTGAGTTGAGGGGAAAAAAGGAAGGGG  
AAGAGAGGGGATGATCTAACGGTTG  
AGATCACTTCTCTCACTTTTCTCCTGAGATGAACTTTTTAAATGATCCCATATATATATAT  
ATATATATATATATATATA  
TATATATATATATATATATATATATATATATATATATATATATATATATATAAAATTA  
ATGCAAATCCCC  
CCCCCCCAAATTAGGGTTTTAATTTTCAAACCCTAGAATTCGACATATATATAAACATAA  
TGAAATATTCGTTTTTTAC  
GTGTTTCAGTAATTAATTACACATTATAAAGGCTCGTGATGCTACTATTGGAATTAAATA  
ACATAACAATCATAAATTTA  
AATACAATAAACATCAAAGTACATGCAGAAGCATAGGAACATATAATTTCAATTTTAAA  
ATGTATGCGTACCTTTTTTAG  
CAATTCAAGAATCAGATCAAAGATGAACAAGAACCTTAATTAGGGTTTATGTGGATTAC  
TGAATTGACCATTACCTTTTT  
TCAATTCAATCCAACGTACAAACAATAGTATGTTTGTACCACGTTTTTGTACACACGTAC  
TAATAACGACTTAAATAGAA  
TGCTAGTTCTTAATACACGAAAAACCAAAACAAGTTTTGTTTTTGAAAATCAAAGTCG  
AAAAAACCTTAATGGGTGTTGT  
CAACCGGTTATGTAAAAGAAGAAAAAGATGAACAAGTTTAGTGTATTAAGAGTGCACA  
AGAGATGACAAATAATGACCCT  
AAGCCTTGATTATATACTAATGAAATCTTAGAGGACAAGTTAGTTTAAGAATGGGCTTA  
ACCCATGCATTACCGATCGGT  
GCTCATCCCATAGGGGATTCTAGAACCTTCCCGACCTCCAATTTTCATTCTAGTCATTTA  
CTTTTACATTTAACGATCGT  
TAGTCAATTTTCGTTAATTACTTTAACGCTCGTTGGTCGTTATTTTTGTATTTAATAATTA  
ACCGTAACATTTACATTAA  
TTATTTGAACATTATTTTTCATACGTAAAATGTGCAATCCCGTGATCTCGAGATTAATTCT  
AGAAATACGCTATTAAATT  
TGTCATTAAAACTAACAAAAAGAACATATGGCCCTGTCATCATGGTACCACCAAACAT  
GACAAAGCCATGCCAAACACA  
CCTCAGCCAATTCGTTGGCTCACGCCAAATGAAAAAATGTTATTTTATTTATTTATTTAT

TTATTTTTTTGTGCATTGT  
GAGTGAGTGAGTATATTTGGTGAGGTAGTGGAACCTACATGTGATGTTATTGGTGTGTT  
ATGGATGAGGGATGTTTAGTC  
ATTGGTGTGTTATTGGGAGGGGATGATGTGGCGTTGATGTGACATACCTTTGGCATGCA  
ATAATACGTGCTCTAAGACTA  
TCCGAATTTTAAATAATGTACGTAACCTTTGAGGATAATAAAAAGAATTTGATTCTTTTAAT  
CCCGGCTCTTAATTAACATC  
CAAATTAAGGGGAAGAATAACGAATATTTTTTATAAAACAAAGTGCATCAAACACGC  
ACCTGTGTTCGTGTATATATAT  
AAATGAATCGACTACTTGGTCCTAGCATTCTAAGACAGTGAGCATAAAACTTTCTTAG  
TTCTATTATCTTTTGTTAAGT

>CsCML32

GTTTCTTGGATGAAAGAGAAAACCAAAAAAATGAAGCTGTGAAAAAGAAAATAATT  
CGGAAGAATAAATGGTGGTGGTT  
GGTGTAAATAATTTGTTGTAGCAAATGAAGGCATCATTAGAGTGGTGTGCAAGTTCAA  
AAAAAAACCCATCCTTGCAAA  
CAAATTAATAAATGACGTAAACACCACTTATTGAAACAAATTTTATGTAAAATCCAGAA  
AATGAAGGTGGTGTGCAAA  
TTAAAAAAAAGTCATCATTTTTTTTTTAAGATCCAGGAAGTTATAAAAACGCCACTTA  
TTGTAAGTTGACCTTTTTTAA  
AAATTTTCATTCATTTTTAGTTGAACTTATGTAAACACTACTTACTGAAACAGATTTTT  
GTGTAAACCTGAAAAATGA  
TGGTTTGATCACTGAATTTGTGAAGAACACATAGATATAATTAGGTTCAACAAGACAAA  
AAGTGTTATAGATTTATAAAA  
GATAGTATATGAAAAGTAGTTTTATAGATGTCATTAGTTTGTTTGAGTTGTACAATAAGC  
TAACCTTTATTGTAAGTTGAT  
TTTTTTAGTTGAAAGGAGTGTGCAATAATGAAAAAGAATGTTTGTTAAAAATAAAAAA  
ATGAAAGAGAAAATGAAATGAC  
AATAATACCCTCATACGACTGTCACATGAGAGCCATATATAGTTAAATTTAACGTCCGTT  
TGTTAAAGGACTCTTAGCG  
TTAAGAGTTTTGGAGTTAGGGATTATCTATGCAAAAAAAGTCAAAAGACCAAACATG  
TGAGTCAACGCAAAACACAAGA  
CCATCTTTGTAATTTACTCTTTAGTGAAGTACTTTTGTAGCTCAAAATACTTTCACAAGG  
CCGACCTTAAACTTTGACTT  
GTTCTTCTATCTTAAGTTAAAGGGCTGCTACTGTGCATCTCGGATATTGTTATGAGGAAA  
TTTCTTGGCACAAGTCAATT  
TTAGGAACGTAGCAATCAAGAAAATTGTATCCCGTACGTTAATATCTAGTTAACAATTC  
ACTGACATAATCTTTATTGT  
TAATCAACTGATGTAGATACGTCACGAAAATAAACTGTAATGGTTACAGTAAGATACA  
TAGTTTTAATAAACGAAAATA  
GTAATTTTTAAAGAGATTTCAACACTTACATAAAGAAGAAAAATATGAGAGGAAAATA  
GATAATCTCATGATCTCATCGA  
CAATTAAGATTTTTGTTAACAATACTTAAATGGTCACGTCTTTGTGACAATGAGTTC  
AAACCATGTAGATTAATCGGT

CAAAAAGGTCGGAACTAATGTTACCCAAAAACAAATATTAATTTTTGAAAATTGATAT  
TGTAATGATTAGACAAAGA  
CAATAAAAAAGGACGATTCTCACATTCATTTCCCTAGAAATTTCTGCTGAAAATGTTAGC  
TGAACCAACTTTGTCCCATCT  
AACCATGTATGATGTATCCTAAAGTACTCACAATCACAAGTAGGCTTGAAACTTTCATC  
TAGTGACATATGGAACGGGT  
TAAGAGATGTATCTTTAAACGTTATTATGATTGGCATGATTTCTACTTTTATAATAAGAA  
GAAATCGTGATGAAAAGTC  
GTCATGATCGAAAAGCACGTAGATTTTTTTAGGAACAAGTTACACATCTAATGAGTCAA  
TAATTAAAGAGATGAAAGAAA  
TTTAACCATCATACATGCATGCTAGCTTTTGATGTTTTACTGCCCACAACATATCCAAAG  
ATAGCAAATGCACGTAATCA  
CCTACATCATCTCATTTTTTCTAAGAAATAGAAAATCTGCTAACAAATCATTTTCGTTTTT  
TTCTTTATGCCCATCGTAT  
AAATATATATACTACCGGCCATTATGTCAATGAAAACTTTAAATTTAATTATTAGTTATGG  
ACTATATATGCCATCCACA  
TGCCAACTTTATTGGTTAATAAATCACCGGGATATTGCCAGGAAGCTCACCTTAATACTT  
TTGCATAAGAATAAATCAAA  
>CsCML33  
TTGATATAGAATCCAAACAAGGTCCCGAAGGTGGTCCAGTTCAGGATCCTACTTTATAT  
TACAGTCTTGCAGGTGGTCTT  
CAGTATCTCACATTTACCAGACCGGATCTCACCTATGTTGTCCAACAGATTTGTCTTTAC  
ATGCATGATCCTCGCGAGCC  
ACATTTAGCTGCCCTTAAAGTATTTTATGATACGTTTCGAGGGACTTTGGATTTTGGTCT  
ACACCTATATTCATCCTCTA  
CCACTTCTCTTGTTTGATATACAGATGCAGATTGGGCAGGTTTCCCATCCACACGATGG  
TCTACTTCTAGATACTGTGTT  
TTTCTGGGCGATAATCTACTTTCTTGGTCTTCTAAGCGACAACACACCATCTCCCGTTCT  
AGTGCCGAAGCCGAGTATCG  
GGGTGTTGCTAATGTTGTAGCTGAGACTGCATGGCTTCGTAACCTTCTTCGTGAGTTGT  
ATTCTCCTCTCTCTACTGTCA  
CTCTTGTAATACTATGATAATATTAGTGCCATTTATCTGTCTGCCAACCATGTTCAACATCA  
ACGGACCAAACATATTGAG  
ATTGATATACACTTGTCCGTGACATGGTTACTGCTTGCCAGGTTTGTGTTCTTCATGTAC  
CCTCCCGTTATCAGTACACA  
GATATCTTCACCAAGGGACTTCCTTCATCCTTATTTGAAGAGTTTAGATCCAGTTTGAGC  
GTCCGGCTTCCTCCCGCTCC  
AACTGCGAGGGAGTATTGGTCGACATTATGTACATAGGCCCGATATGGATTGGTATAGA  
AAAAGTTCTTTTTTAGGCCTC  
CCCCTCCCTTTTTTGTCTCTGCAACAACCTCATTGCAGGTTCCACTACCACTTCCAATG  
GTAGGAATAGATATCGCATCA  
CTACCACCCATATTTGGTTCGTTGTAAGTTTTGTTCCATATCGATTCAAGAATAACTTCTA  
TCATCTCATTCCTATGTT  
CTTATACGAACCATACTTGGCAATAACTTGATCACCAATTGTAGCCATAACTTCCTCAAA



GACTTCATCATTTAATAACA  
CTTTCCTCACGATTTTCCC  
GATGATTGCCCCCCCCCCCCCCCCCCCCCCCCCCCCCCCCCAG  
TTAACAAAGACTTTCCTTAT  
CACTATTTTCCATAGCTGGTTTGGATGTGTGTAGCGAATGGATAAATGGGTTGTGTGCGAT  
TTTTTGTTTTGTTTTAGATA  
GGGTTTTACTGTTGTTTATTGATTTGAAAGTATATTAAATGAGGTTGTTTTGGCACTTATT  
GTTTTCTATAAAAGCCTAC  
TCTAGTTGATTTAATGAAGTTAGAGTTATATTTTGCAAATATTTTCTTTGAAATAAGTTAA  
GAGGGAAATGAAGTATAAT  
TGGCAGGAGAGAGTGTGAGACGTCAAAAACAAAACAATGAAATGGCGATAATACCTCA  
GGGGTGGGGTCATGTAACCCGAG  
AACTAACGCTCGTTAGCAAACAATGCTTTTCAGTGGCTGTTTTGCAAAAAACGAAAAT  
ATTAATGGCTGTTTTGCAACAA  
ATTCGTCTCTGAGTATTCCTTACATTTTCGGAAAACATTAAAAACATAATTTGCAATTT  
ACCCATATTAAAAATATCAA  
ATTGCTAAAAGAATTAGAAAATAGATATTACGGTTATGGAATATAGAATAAGAATATGAA  
GATTATGCTATGAAATTGGG  
AAGGCAAATGTGAAGAGAGAAATTTTGTTTTTTCCATTTATATTACACAACCACCGAAT  
TTACAAACCATAATATTCTTT  
TAACTCTTTGCATTAACTTTGTATCATCACCTATTTAATCACAACATATTGAATGGTGAT  
CATCAAACGCATATATCTC  
CATGCAATACATGCAATTCTCTTCTCTTCCATTATTCATAAACCAACCATTAAACCACCC  
TCTATTGCCACCGTATCCAA  
CCACACCTTAATTTGCCACCTATCTCCTGATATCAAATCAAAGATCACAACCATTGCCAC  
CACGTACGCGATACACGACA  
>CsCML34  
CAACCCACTCCCCTCCACCGACCAACCATCCGTTGCCACTCTCACTTCGGCACCCAC  
AACCACACCCTAATCCACGTC  
AACTCACCCCATGGTCACCCGCTATCGTGTTGGTTCTAATCGTCCTACACAACGATTCA  
CCTTCAATGTGTTTACTCTTT  
CTCCACTCCCTAAGTCGTACACCCATGCGTTTTCGTGATCCCAATTGGTTACATGCTATGC  
TAGATGAATATAATGCTTTA  
ATTAAAAATAACTTGGATTCTTGTGCCTCGACCACCGGACGCGAACATTGTTTCGTTT  
TATGTGGCTTTTTAGACACAA  
ACATAATGCAGATGGTAGTCTTAATCGCTACAAGGCACGCCTTGTTGCGAATGGCAGTA  
CTCAACTTGCAGGTATTGATG  
TTGATGAGACTTTTACGCCCCGGTTGTAAACCAGCTACTATTTCGCACGGTACTTAGTCTT  
GCTATTTCTCGACACTGGCCT  
GTTTCATCAGCTGGATGTCAAGAATGCTTTTTTACATGGTTCGTTGTCAGAGACTGTTTAT  
ATGTATCAGCCACCTGGTTT  
TCGGGATCCGGATCATCCCGATCATGTTTGTCTCTTGCAGCGATCACTTTATGGGCTTAA  
ACAAGCCCCCTCGAGCTTGGT  
TTCAGAGGTTTGTGTCATATGCTACTCGGGTTGGGTTTCAGCATAGCCGTTGTGACTCA  
TCGCTATTCATTTATCGTCAG

GGGACAGATATAGCTTATTTACTATTATATGTTGATGATATTGTCTTGACTGCATCTTCTA  
CAGCACTTTTACAGCAGAT  
CATTACTTCTTTGCACACGGAGTTCTCCATGACGGATCTTGGCCCCCTTAATTATTTTTT  
GGGAATATCTGTGACTCGTA  
CTTCTTCAGGCATGTTTTTGTCAACAACAAAGTATGCTACTGAGGTTCTAGAGCGTGCT  
GGCATGCTTACTTGCAATCCG  
TGCCGTAATCCTGTTGACACGGATTCCAAGCTTGTTGCTGATGGTGATCCTGTTACTGA  
CCCTACATTATATCGCAGTCT  
TGCCGGTGCACTACAGTATCTTACTTTTACTAGGCCGGACATCTCTTATGCCGTTCAACA  
GATTTGTCTCTTCATGCATG  
ATCCTCGGGAGCCCCATTTTGCTGCTCTCAAGCGGGTTCTACGTTATGTTTCGCGGAACC  
CTTGCCTATGGTTTACAGTTG  
TATTCATCATCGACCTCATCCTTAGTTGCATATTCGGATGCCGATTGGGCTGGGTGTCCG  
GTTACACGTCGATCTACCTC  
TGATATTGTGTATTTCTTGCAACAATCTGTTATCCTGGTCTTCTAAGCGTCAGGCTAC  
TATTTCTAGGTCAAGTGCTG  
AAGCTGAATATCGAGGTGTTGCCAATGCGGTAGCTGAGACCTGCTGGACACGCAATTT  
ACTGCGTGAGCTACATATACCA  
CTTTCGACAGCTACGATTGTATATTGTGATAATGTCAGTGCCGTTTATCTCTCATCTAATC  
CCGTGCAACATCAACGCAC  
GAAGCATATTGAGATTGACATCCACTTTGTACGTGATCTGGTTGCTACTGGACAAGTTC  
GTGTTCTTCATGTTCCGTCTC  
GTTATCAGTATGCGGATATCTTCACCAAAGGGTTACCTACTGCTCTGTTTGATGAGTTTC  
GCTCCAGCTTGAGTGTTCTGA  
TCCTCTCCCGCTCAAACCTGCGGGGGGATGTTAGCGATAGGCTTCATGGGCCTAGCCCGT  
TTATGTAGTTGTGTTGTATTG  
TAGTCCACTAATACTCTATATAGGGATGATATGTATTGAGTTGTACAGACACAGAATATA  
ATCGATTCAATCATTATCAA  
TTGTTAGCGATTTTGGACCCGCGCGTAACAATCAGGAACTTGCCAGGTGATTTTCTCC  
GGAAAATGGACTAAACATGAA  
ATCTGGCAATACCCCAAGGACTAACGGTGTATTTTACTAAAAAATAAATAGCAAATATTT  
TATTCGTAACACTACTCGGGAA

>CsCML35

GTACGTTTTAGGTTTTAAACGTTTCATCACTTTAAATATAGTGATAGCGTTTATTTAATAGG  
TTTTATCTTTTAAATTTTC  
TTTAATTTGCATTTAAGGCGTTTTTAATTTGTTGGCTTTTCTCGTAGTTATTATATCATTCA  
TAATCCTTTTTCTGTTCA  
AACTTCTCGATCACTAGACGTTGATTTATCCATTGCACAGCTCGCTGGGACATAACGAC  
CCGGGGAGACTCTATACTCCT  
CTGATCTTAATTGCATTGGTGTTTGAGCAGTTTTTAGTCTTTTAGGCTTGACTGTTTAGC  
ACCGATCATGACTCATCAGA  
ATATGCAAAGGTGGAAGATGACACAACCTTCAGGTAACACAGGTGGGACATGGCCAGG  
GTATTTTCCACCATTGCAGTATG  
TAGTAGCACCTGATGAGCTAGAGTTTTATCAACCAAAGGTGGGCTCAAGCTCACATTAT

GTTGAAACTACTTCTGATGAT  
GCAGAGGATGATGAGCCACTAACCCAAAAACAGATTGATAAGCTTCTGTTTGATGCAA  
GGCCAAAAGTTCTAGGTTTGCC  
TGCAAAGGCCACTCTTGAAGCATTTGGTGTCAAACCTTATGTTGCCAAAACCTCAAATT  
GCAGCTCCAAAAGGGAAGGGGA  
AGGGAAAGGGAAAAAGGATGGGTTAGAAACACCTACTACCCTAGCACTGGTCTATGGT  
CTTATCAGCTCTTGGTCTTTCA  
GTTTAGTTAATGTAGGCCTTTTATGGCCCTATAATAATGTGTTTTCTATCAACTATCAATG  
AATGCTATGCTCACTGTTT  
TACTATGGTCTACAAATCACACTGGATTGTAACAGATATTAGAATGCAACATAAATATAA  
AAAAATGTAAGCAAAAAGACA  
ACATTTTCATTCCATAACATAAAACCATTACAACAAGACCCTATTTACTTGGCAATTGTC  
ATACCTAATACAACACAAAT  
TAAACACAAGCATCCTATCATAATGTAAAATAACTTATCATACAACCTGCAACTTCGACTT  
TGTAGCCTTCACCTCATCTT  
CCAACAGTGACTTTTCCATAGCAAGACCTTCAACCATGTGTTGAGAATGTGGATTGTTG  
CTCATGTGTTTCTGCCTTTCA  
AAGAACCCAAACACCAACTCTTTGTAGTACTCAGTAGGAAGCTCTACATCAAGAACT  
CGTACACTTTGCAATCATTACA  
TTTGACAAATCTCTTGCCCGGATTCCCTCCTGTGGTTGAAGTATGAACCTTTAGTAGAC  
GGTTACAGTTACAGTAGTATT  
GAATCTTACCACCAATTAGTCGTGATTGTGCTGAGCTTGAGAACTCATTGATTAGGGT  
TTATACTACTTGGGTTTGTAG  
CAGATTTGGGGAAGAACAAGTTTTTGGTTTTTTCATTTTAATAAAAAGCGTTTTTTTTTA  
AATATTAGTCCACATGTTTGG  
TAACTTGACATAAATGGTCCCCCAATATAATGCAACGAGTAAAACGGGTTTTTTTTGGAT  
TAACTCTTAATTAATTGTGCC  
ACGTGTCCAATTTGGTTACAATAAGAGTCATTAAGAAAGTTTTTTGTTTTAATAGGAAA  
ATTAAAAGTTTATTGTCACAA  
TAGTAAAAAGTGGAAGTTTGTGTATTTTTTATACCATTAAACCCTACTATAAATGGCATT  
ACCTTCAAAATGACTAAATC  
AAGAGCAATATTGTTACCAAGCAAACAAATTGACAATTTACGAAATTAGAGGGTGTCC  
ACTAATATATTCCCTCATATAT  
TTTCTCCTTATTTTTCTCTTAACCACACACACCCTTGATTATAGTAATTCATCCTCAATAA  
ACCCTTCACTCTACCTTA  
TCACAATTTTTACAAATTTTCTTAATCTTTTTTTAATACCCCTTTAAACCCAAATCATATT  
TTGATCGCTTTAGTTTCCA  
TTTTATCGCAACTAATTTTACCATCAATCATCAAACATTTCAATTGTGATTTGCTTGATATA  
TGTGGCATTTTCATGCAAA  
>CsCML36  
AAGCAGCTGCGAAACCCTGTCAAGGAGATTCTTCAGAATTATACCTTATCACAGGCAG  
TACTTGTAAGTATCAACGGGGA  
ACCGTGGGCGGTGTACCTCAATTCAACGAAAGTGATCAAAGAACTTTCGTGCGCTTT  
ATTGCTAACTGTTGTATGCAGG

TACACACAACATTTGCAGCTGATCAGAATTGAGAGGTCAATCCATAGCCGCATGCTCAC  
ACATCACATTCATTTCAAAAG  
AAATCATGATTAGTGCATCAATGACTCTGATATTCTCACTCCATGCTTCTGCTACGCTGC  
TGCAAATATCATGAATCAAC  
TAAAGCTTCCGCTACTCTGATGAAAAGAAATCATGATCCAGAATGTGAGCATGTCGGTC  
CACTGTCACAACATCACATAA  
TGTCTACACTACAATGGAAGAGTCAGAGATTTATGCAAGCTGATGATCTCAAACTGG  
CTCAAACTCATCATCACGTGG  
ATCAGTTAAAGACCTCCACTTGAATTGTCCAAACAAGCAAAACATGAAGAATTAAAGA  
CTACGAGCTACAGAGCAATGAA  
CTTAAACAAGAATCCAAGAACAATCTTAATGTAATATCTGTTTGTATTATGTGTAATTTG  
AGGTGACCTCCCTTAAGGGG  
AGATTGTTAGGATTTAGAAAATTCAGTCGTTAAAGAGTCGGTCACCTCAAGTATATGTA  
TACGTTAGAAAGCTCGTAGTC  
GTAGTCAAGTTATGTTAATAAGTAGTTAGTTAAGTAACACCGTGGAGGACGGACGGGT  
CTTTACCCACTGTATGCCTGAT  
CCACAGCCCGTAGGTGGTGTATTATTGTAAGACACTATAAATACCCTCTACCTCCCAAGG  
TAGAGGGTTGGAGCTTCAATA  
CCATTTTTCTTTGTTTCACATAGTTCCCAACTCTCTTCCCTTTCTCTCTCTAGAACTTTTT  
CTCTCTAAAACTTGTAAC  
GCTCCATATGTTATTGGTTTGATTTGTTTGTGAAATCGTATATCTTACATATGTACTAACG  
GGTACAATACAAGAGTAAA  
ATAAAAGATCCCAATGAGTCGCCTTGCTTTATTACTTGTA AAAAGCGACTATAGATTATAT  
TGCTTTTACAGCAAACGGTA  
TCGTAACCATTAACACGTTATTCTACTTGATTCTTGCACAATGGCGCGCCATCTCCATAC  
CAGCCCAGGCGCTATTCGTG  
AGTCATTTCGTGTTTGAGCCAGTGAAATAACTTACGCCACCGTTTATTTGTGCTGTTTTTT  
TAGGACCACCTTGGGCTTAA  
GTTGAAAGAAGAAAGGAAAAAAAAATGAAATCGGAATAGCAGGTCGATGACATTTTAC  
TAACGGAATAAATGAGAAAGATG  
AAGTGAGTAGGTGTGCATTTTTATTCTTGATATTGCATCAAAAATAGTACTTTTATTATTG  
GAAATAGCAATCTAGGTGT  
TTGGTGCCACTTATTTAATTTACATTAATTTAATAAAAAGTGTTTGTGTTTATGTATTGTA  
ATTTTATTTTATGTTTTGT  
AATTTATTTTATTTTTAATAAAAATGTGTTATTTTTAAATAAAAATAAAAAATAAAATAGTG  
TGTTCTAATAACATGTTAT  
TGGTGTGTTATGAGGGAAGGTGTTTGAGTTATTAATGAGTTATTGGGAGGTGTATGATG  
TGGTGATGAGGTGTTATTTGT  
ATCCCTGATAACTTGTGCTCTTATAAGTGATTGTATTCTCACGTTTTAAGTTTTGAGAAA  
TTTTGTTTTCTGTACTAAA  
GATAAAGTTTAAAGTTTATAAACTTTTATTTTTTAAGAATAAAGCATGTATTTTGATAA  
AGTTGTGAGCCAAAAAACG  
TTTTATTAATCGGTTTCACGATTTTGCTCGTTTTTACAAAGCGGTGGCGACTGTTTTTCA  
TTAATGAGGTAGGACAATCG

TATATAAATCCCCATTCAATTCAACACCTCCTACATCACCCTCACCAAAAACAAACTCCTT  
CAATAATAAAATAAAAAAGC  
>CsCML37  
AATCTCAAATACAAAACAACGTTATCGGAAAAACAATATAATCATTCAAATATATTCCT  
TAACGCTTAAAATACTTATT  
AATGAAACAAACTTAATCGCCGCTAAATTTTTGTGCGAACTAGATACCGCTGCCGCTAA  
GCACGGGTACTCGTCTAGTAT  
ATATATATTATTGTTAAAATTCTATTCCATAGCTATTAAATAAGTGTTTATACATGTTGCAA  
CGTAGGGGATATATACCT  
CGCTATTCACAACAATCAGTTACATTTTCAGTCTAATTCTTTTTTATTACATTTAAGTTGC  
CGGATAAGTTAGTCACTAA  
TAGAAGATCATGTGCATAACAAAGATCTCTATTTACTTGGTTTTTTATAGCTCATTTTACT  
TAACTAGGCAGTTACCCGT  
GCATAAATACGAAATTTTATAATGACAAACGATTATAATTATAATATTATGGTTTAGTGTT  
TCGTGTAATGTTTATGCAT  
ACAACGTAAAATAATCAAAATAGAATTGAAAAAGTTGTAATACGCGAAATTCTACCCAA  
AGAACAATTCTAAAATGTAA  
AGAGCGTATAAAAATATTTAGTAAAAATAAAACATTATATCAATTCTAAAATGGCATGCA  
TATTTTTTATGTTTCGGTAG  
TAATATTGTAAATACAACCTATTCATTAAACTAATTGTTTGAATTTTATATTAAAAAGTAA  
ATCAAAAATTAAAATTTAA  
GTTTTAAAGTAGGATCCGAGATTTTGTTTAGGTTATAAAGAACCCTCCAAATCTATAAG  
GCTAGCCCCAATAGAGGCGAT  
TCACACTCGATCGTGCTATCTGGCGATCGATTTTCATATCGATCGTGTTGTTGTGGAAGAC  
ATTCGATCGCGTCCCATGTT  
AACCAAATCAATCGCATGCAAGATCGATATTTATTGTTGTATCGTTGCATATGAAACAAA  
AAAAAAAAGAATCATACCCT  
TACTGGGGCACCTAATCGCCTGAAGGTCGCTGGAGAGAGAAAGCTGACGTGGCAGGG  
AAAATGAGGGGGATTGAATCCCC  
CTACTGGGGGCAGCCTAAGTAGTACCCTTCTTGTTTTATCATTCTTTTTATTTTTATAAT  
TTTGTTTATATTATATAAT  
TGTAATGAAAAGTACAAAATTAAAAAAAGTACAAAATTTAATAAATCAAAGAATT  
AAACTAGCAAAAAGTACAAAAC  
ATAAACCGATAAAAAAACAAAAAAAATAATTACAAAATATTTGTATTTATGTGAGCA  
GGAGGGTAGAACCGTTTTTAC  
AGTAAGGGTCCGTTTGGTTTGCTTATAGAAATCACAATGGATATTGGTATGATAAATTGT  
GGTATGGAAATAAGTTTGAT  
AGTTCAAAAAATGTTGTTTGATAAATATGTAAGAAAAGAGTGGGGTGAGTGAAATTAA  
CGGTGAAATATGGCTCACATGA  
ATGTTTTGTCAAATCAACCAAGTTTAAATGGTATGGATGTATGGGTTTCAACTATGGG  
CCCTATAGAAATGGTTTGTGA  
AAACTCCTCAACCAAATAAACATAAATGGTATCAAACCTGATTCTCACACCTTTATACAA  
AATGGACCCTAAGTTTTTTAA  
GAAAAAATGTTAAGAAATGATACATGGACCTAAATTTAAGCCTAAACTTAGACCTAAAA

CTACTTGACATCATTTTGATG  
GATTATAAAATAAGTAAGTCTCTGTCTGCAGCTTTGGGACGATGAAATTTAGATACATTT  
GTATTATTTCTCAAAAATGT  
TTTATGTGCGATAGAGACATTAATTAAAAATTAAATAAAACAACCCTACCACACCACCAC  
AGCATATAAATAGTCTCTCTA  
CCTCTCCTACGAACCTTCGTGGAAGCTCACTCACAATGCCTCTAATTTCTCCATATAACC  
ACCCTCACACCTTCCTCTCT  
TTTTCCATCAAACAACAATCTCCATTGCCAAATACTAATTACTTTTCTTTTCATTTCCCTT  
CCTTTCACTCCCAAAAATC  
>CsCML38  
ACACCCCTCAACCTATTCAAATTCAAATTTAAATTGTACTGGTCAATTCTTGGCGGGAT  
AAATTCAAATTCAAATTTAT  
TCAAACCTCAAATCAACTCTGCCTATATATATAACTCTACCAGAGTTGTTTAGAACACAC  
AACACACACAAGTTACACAC  
ACAACCTCACACACACAAAAATGTCTCGCAAAGATTTTCTCAGCAATTCTCCAGCCCA  
GAAAAGTTGCCGGAACAGCT  
TTCCAAATCCAAATCACTTGCCGGAATCAGCTTTCCAACTCTACCAGAACATGATGTT  
TACTCTACCCACAGAAAAT  
GTCTTTCCGGTGGGTTTTGAAAACATCCCGTACCTCCCAATTGTTTCTACTCCACCTGT  
GAACAGCCCACAGGTGGATTT  
TCAAAACCACCGAGCGGGTTAAGTGAGGCTTCCCTCCGGCAATTGGAACGAGATGAA  
GAAACCGTAAGGGAGATTATGGA  
AGAGCAGACACGTGAAGAGGCTGCTCGCCGTGAGCAAGAAGCACGTGAAGCTCAGT  
ACCTGCAAGACAACCTTCTTCGACA  
TAATGGAGAGTCGATACTTTAATGGGGAGTTTTATTCTCCGCCAACCAGTTCTGATGGT  
TGGGACTCAGACGACTCGTTT  
TTTTAAGTTTTAGTAGTTTTATTTTCGTCTGTATTTTTAATTGCAGTTTTTTTTTTTTTTT  
TTTTTTTTTTTTTAATCT  
CGTATTGTAATATGTTTTTAGTTTTAATGAAATGTTTGTTTTAGTTTAATAAATGAAGTGT  
TTGTTTTAGTTTAGGGGT  
GAAATTGAAAATATGAAATATTATTGGTGTTATGGTGTTATTGGGATGTTATGGATGAGA  
GTGTTTTTTGGGGATGTAA  
TGTTAAATGTTAAAGCTGATGTGGCGCTGACGTGGACGGTGTTATTGGTGTTATGGTGT  
TATGAATGGGAGTGCTCTAAA  
TGCTAAAAAAGACTTTAAATTTTCTTTAATGCTTTTATCTAAATTCTTGCTCCAACATGA  
TGTCGAATGTTCTCGGTTGC  
ACTAACGACATAAAAGATATATTCTTAGAAAACGATTTTCAAGACACTCACCGTTCACC  
ACCAAGACTGTATTTCAAGAT  
GAATTCAAGCTTATCCTCAACGCATGCGGTAACAAAACATTGACGAAAACACAACATT  
ATCTTAAATAAACATTGCAAGA  
CTAGAATACAACCTACAATGGTTTGTCTTCATATTTCCATATGCAATTATATTTACATCTAT  
TTGCTTTTGCATGTATAT  
CTTTATTTGTTTTATGCAATTGTGATATCTTATGATATACGAAAACACTGGTTCTTCTGT  
TTGCGTCACGCGAGATTGT

TTTTTCTCGAGAATTTATCGATGCTATTGAATTTTATTCATGATTAGTGAAATATAGTAT  
GTAAATGGGAGGTTAGA  
ACTTGTGCGATTAGTTTAAGGAGATGATGTTAATACTATTATTAATTAACAACCCCTAAC  
CCAAGGCCTTTTCGTCTAGTG  
GTATTTGAGTTGTCCACAACTTAAAAGTTGTAGGTTCAAGCCTCGCTGCATGCATTCTG  
TGAGATTATATTGTGAGATAA  
GTGGTATATGGTGTGAAAAAAATGACTTAAAAAAAACCCCTCCCAAAGTGTGTTGC  
GAATTTTTTTGGTATGGATCAC  
GATAACTTAGCACAAGTTGATTCATCTCACAGTTAAATTTGCCGATAGTGGAATATAACT  
AGTGACTTATTATAAAAAAG  
ATGTTGGAATGCTTAATACAAATAAGTGAGTCAATCGAACCCATTTCACCACGGTTAT  
TAAAAGTAAATGGTTTTAACT  
AGAACCCATTTAACCCTAGCCTAAAGTGTATCATTCTTATTTTTTTTTTTGGCAACCAT  
GATTTCCGACCTTTTGGCCG  
ACCAATCCACTTACGCATGTAAAGCCTATGTTTTCTTTTCACTTTTGGTAATTCATTAC  
ATCTTCACTTGGGTGTCA  
>CsCML39  
CAGGCGGCACATGAATTAAAGTATATGGCTTTTTATGTCCTAAATCCTTGTGTCTTTTTT  
TAATAGTGAAGTTTTTCGTTA  
TTAAACTGATAACATAAGTCAAGTGGCTTACCCAATGCCACGAAAAATCAATCTGAATG  
AACCAGCCAATATCTCTGAAT  
TCGTGCAGCAAAAAAGATTCAAGTAGTACATATTGCACATTATTTGTAGTTAACCATCTA  
TGAGCCAACTCAGCATTG  
AAACCGTAAATTCTAGTCCACTTCTTTACTACTTCCGTAGTTATTTAACCAAAGTAAGTC  
CCTTTTGGACTTTGCGTGCC  
AAACCTTTATAGAGAAGTTGACAAGGCAAGCTAGTAGAGTACTTGTTATTTGAATTTAT  
ATCGAAATGACAACCTTTTTTG  
AACAAGACTGCAATGACAATTGACAGTCATGAAAATAATATTGGGCGTATCATCTGCAG  
TAATTGCTTAAGGAAAAGTGA  
GAATCTTGACTTGTTGTAAGCTGTCACAGCAACCCAATGTATGTGATTTGGCTCTTG  
ATTGTATGTTTTCTATAAGGG  
GGAATTGCATATATACCCACTAAAACCTCAAATATTTGCATATTTCCCCAAAATACAAGTT  
TTCAATGCATGATGTACAAT  
GCAAGTTAAGCATGTTTTGGGTATATATGCAAATATGCAAGTTTTAGTGGGTATATATGC  
AATTGCCCCCTTTCTATAAAA  
CGTATCACATGACTCTCAGTAACAAACAATTATGTCACTTTCTAAAACCTATGATGCATAG  
AGATTTTCGTTTTGTGTGTAG  
ATCAACATACGTAGGAATCACATGAACCGCTTTATCATTGATAACGATAATCTTTTTTAA  
AAACATCTTTGTGCTTGAGC  
ATTTAGCCTCGTTCAAATAGATCCCCAGCATACTGACCCATCAACAAGCAGTCAAAT  
TATCTCATCCAAGGATCCTGT  
TCCAATATGTCTTACTAGAGCGTTTGTCTTGTTCCAAATAAGTAGCTTATCATTGCAGC  
AAATCATTGTGTGAAGATGG  
TCATAATGATTAAACACCGGCCATTCTGGTTACAGGAATGAGTAACTACAAAATTTTT

GGACTAAAGAGTTTAAGGCTT  
CTTTTCTTGATAACTCATAGTTATAAAAGATTTTTTAAATTAGGATTAAGGTACTGATAA  
TTTTATTCTTCATATTTT  
GCTCATTTTTAATGTTTATATGTCAAACAGTGACATATACTACCTAGAACTTGTACT  
AGCCTACTTCACTTGGGTCC  
TAGCCTTTTTGCACTTTTCGCCTGTGGCGAGATGCAAGTTTGGCTGCCTCAGTTCTGTT  
TTCGTCTTTAACTACCTGCC  
TTTTATCAAATATCGTTTCTGTTTGGAAAACAGTAGCTCATATACATAATCAATGCCACTT  
CCATGATCCATCAAATATG  
GATTTTATAATTACTAAAGTGGGAGTTGGTTCATTGGAGAGTTGTATCAGCCAGATACG  
AATGCAATTAAGGTAAATGTT  
GTGGAAAAATGTTTCTGGGATATTGAAATGAATTTTGATTGAACGAACCAATCAAAGT  
GAATTACTGATCTGTCTTAAG  
TAGATCGGTTAAGTGAATCTAATTTATCTAACTAAATAGGTGATGCAGAAATCATCATC  
TGCTGTATTGAGAGACCCAA  
GTTACTTTTGATCTTCAGTACATGCGCTGAAATACAGGAAGGGACATAATATACAGGAT  
TACTACCAAGGGTTTGGTTAT  
CTATAAAAGGTGTAAGGATGTTATATGCAGAGAAGTCAAATTGAGTTGGGACTTTATAC  
TTCTCTCATTTCTTAATCTTT  
TGTATATAGGGGTAGTAAATTAGCGGTTACTCTTTTGACCTCTGTTAGAGGGAAAATTTG  
TTTAACTGGATATTTGTCTT  
GTAGCTTTAGATTTATCTTCAATTTACTGTTTTCGTTTTGTATTTTCTGCAAGTGGTTCTT  
ACATTTGATTTCTTTCTCA

>CsCML40

AACCCTCGCTTTTATTTCTTTAGTAGTTAATTTTATCGAAATCATATTAATATGTGACA  
CCTAGACTTAATTTAAATC  
CGCACACATAGCTCTTGGGACGACCTCGGTTTTACCGAATACTACACTACACACGGCC  
GGGTACACTTCCCCGTTAGTGC  
ATTAGGGTAGACTATAGGTATAACGAGTAATTATAAATATTAAACCTGGTCAGTAAAC  
CTGCATCAGTCTCCCACTTG  
AAACTCCAGGGTCTTACGTCTCTTATCGGCGTAGCTCTTTTGTCTATCACGTGCAGCTT  
GCAAACGATTACGAATTTGGA  
CTACTTTCTCAGTAATTTCCAGCACGAGTTCGGGAGTGGTAAGCTGGTTGTCGCCAACT  
TCCGCCAACAGATCAGAGAA  
CGGTGCGGCCTTAATGCTGGTATGATAGCTATTGTTGTATGAGAATTCGGCCAAAGGTG  
GGTACTTCTCCCAGCCTTTGT  
CGAAATCGATAACACAGGCACGAAGCATATCTTCTAGCGTCTGGATGGTCCTTTCGCTC  
TGAATGTCGATTTGAGGATGA  
TAGGCAGTGCTCATGTCAAGCTTCGGTCCCAAAGCCATTTGCAGTGACTGCCAAACGT  
TTGACGTGAAACGGCTATCTCA  
GTCGGAAATGATAGATATGGGCAAACTACTATTCATATATATATATATATATATATAT  
ATATATATATATATA  
TATATATATATATATATATATAGTGAGGATTAGGTGCGGATTTTTTTAATTCGTGCGGAT  
GTGCGGATAGATCTGGAC



CACCCATTCCAGATCTGATCTTGACTTTTTGTAAAAAAGTCAAGATCTGCGCTAACTT  
CACGGTACCAATTGACCATCT  
AAACGATTTTTTTAATTTTTTTTCCTTTTGAGGGATCGTTACTATTGTTATCTTCTTTCATT  
TTTTTATTTTTCCAGATT  
GTTCTGAGCAATTTTTGTTTTTTTGATTATGAGTCCTACCGTGATATTAACGATATTATG  
AGTCCTACTGTGATATTAA  
AAAACATGATATTATAAAATGGTGATATTATAAAACCAACTGTGATATTAAGCTTTTTTA  
CATGTAAAAAATAAACCGT  
GATATTAAGAAACATATGATAGTTACTATGATATTAACAATTTTATTAAAAAAACATATGA  
TAGTTACGGTGATATTAAC  
AATTATATTAAAAAAGAAAAAACGTTTCTGTGATATAAAAAAGTAACCGTGATATTAA  
ATTTTTTTATTAAAAAAGTTA  
CGATGATATTAATAATATTAGTAAAAAACAAAAAGTACTGTGATATAAAAAAAGTTA  
GTGTGATATTAACAATTTATA  
TTTAAAAAAAATTATGTGATATTATGATCAGATCTTGACTTTTTTACAAAAGTCAAGAT  
CTGATCTTGACAAAGATCAG  
ATCTTGACTTTTGTAAAAAAGTCAAAATCGACCTTAATATCACAATACCTTTAATCATGA  
AAACGATTTTTTTTTTTTGAA  
AATTTTTTCAACGATTCTTAATAACTTATCATCCTCTTTATTTTTTTAATTTTTTCAGATAT  
TTTTGATTTTTTTTTTAA  
AAGAAAAAGCTACTGTGATATTTCCGCACCATCCCTACTAAAAGCCTAAAACCTACCCG  
ATCCCTTCTTTATATATATAT  
ATATATATATATATATATATATATATATATATATATATATATATATATATATATAGATTT  
GCGTTCATGTAG  
CGACCAATCTTAAATAAAAACTATAAGAACCAATGAAAGTGTGACAAGTGTTAATTA  
AAAGTTTAATTTAAATAAAAAAT  
GATAATCTTAAATATAAAGATATTATGGGTATTTGATGCATCTTAAATTCCCACATCCTTA  
AATCACTCCTTTATTGCAA  
CGACCTCCATCAGAAATCTCTTAAAAGAATTACATCTCTCCATTATCTTCATCACACAAG  
TCTTCATGTACAATATGAAG

>CsCML41

ACCCAACCAAGATGATTCAAGCTTACCAAATGAAAACCTAAACACTTGTGATGATTCTA  
AACATAAAAGTACCAACAAAA  
TTCAAACCTTAAACACAAGAAATCACCCAAATGATGCAAAAACCACTAAACTTTTTCAA  
ACTCAAAAACCACCTAAAAACC  
ACTATAAATCCAAAGATGTGCAAGATATGATCTAACCTTGGCTCTTGATACCAATTGTAA  
GATATAACTTTTCACATGCA  
CATCAAACCATAACACAAAGTAACATATAGATGAAATTCTAGAGAGAGAAAGTTAGAG  
GTTTAGGGAACCTAGTGAGAGA  
AAGTGAAAGATATTATTATGAGCTCCAACCTCTCTACCTTGGAAGGTAGAGAGTATTTATA  
GTCTTACATAACTCGCCACA  
CTTTGGGCTGTGGATCAGGCATACAGTGGGTAAAGACCCGTCCGTCCTCCACGGTGTT  
ACTTAACTAAATACTACTTAAC  
TTAAGAATTACTACGAATCCGAGCTTTCTAATGATTACATATACTTGAGGTGACCGACTC

TTTAATACCGGGAATTTCTA  
ATTCCTAACAGTTCTTGCCACGATTACGCCAACCGTCTTCCTGGAGCCGATTTAACGT  
TCACATTAGAAAACATCCCAA  
ACCCTAAAACAACAACACATATCAAAAAACACCCAAAAACATCAAACATTTGAAATAA  
GGTTGGTCAATTTCCCTTACTA  
TAGACCCTAATTACATGAACATAATACACCTAATGCACTAATAAACTAAAAACCTGCAA  
CACTAACTAACCAAAAACCTG  
ATTGGTTGCAAACTAAGATTGGTTGCAAAACACATTTTCACTTGCCATCAAGTTATTA  
GTACTACCCACACAAAAAGCT  
TAAACAAACATAAATACACATCTATAAATCTTCTTCAAAAATATGGAAAGATCATGACA  
ACCATCAAGTTTTTAATCCCT  
CTAAGCCGACGGCTCGGCTCGGCTCGGCGTGTGAATAGTTTCGGCTCGAACCGCGGCT  
CCACATTGCACCCGAGCCATCA  
TCCTCCCTGGAGCCGAACGACGAAGGGACGAACGACGCTGGAGCCTGAATGGTGGTG  
CAGTATGGCGCCATTGGTCCCTA  
AAAAACCCAATGGCTAGCCATTGGTATCCTTATACCGTGCACTCTAATAGTGTGACGG  
TCAATGACATGTCAAAACATA  
TGATATTAGATCAAATTTTAAAAGTGTTGTATATCCGTACTTTTTTTTAAAATTATTACTCC  
CTCCGTCCCAAAATTATTG  
TCCCCGTTTGACTTTTTTCGGTTTTTTTTTACATCTTTGACCTTAAATATTTTCTTTGTG  
TTATATGAACTTGATGCA  
AAATATATGAATGGATTTTCATTTTACATGTATTTTCATTGATATAATTTTATCAACTATTG  
TATAACACAAACAAAAAT  
ATTTAAGGTCAAAGTTGAGAAAGAAAGACCGAAAAAGTCAAATGGGACAATAATTT  
TGGGACGGAGGTAGTATTATTAC  
TTTTACCTAGAGTTTATGCCAACCGACTATGTACCATATAAAAATGTAACGTTATG  
AGTATCACAAAGGATTTATA  
TACATAAAAGAAATAAGAAAAAAAATTGTCAATTAAGGTTATAACATGAAAGTTTG  
GCTGTACCAAAGTACTTGACAA  
CTTGTTTTACTTAGAAAGAATTTTATAGGTACCAAATAGATGATAAGGAAGACTTGCTT  
TCCTAAAGCACACAAAGAATC  
AAGAATAACTTTAATCATGCACGTAGACCATTTGTCATGCCACAAGCCTTAAATTGTTT  
CCAACCTTATATCTCCTAACA  
AGTTGCTTCACACAATATTCTTTCCTTTGATACCATTTAGGGCAGGCATCTAAACATCTA  
CCCCAACATTTGGTATATTA  
GGTACTCTTGTTTCATAGATAGCCATCTAAACATTTAAAAAAAAAAAAAAAAAAAAA  
AAAAAAAAAAAAAAAAAAAAACA

>CsCML42

CTAGTTTTCTTGCAAAGTACATTTAGGATATGATAATAACTTGATATCCTTCCTTAATGGA  
CAAACCTTACACACATATAT  
TGAAAGACACTATTCTAGACATACACACGCAACCTTAAATAAAACACACTAATACACGT  
ACACCCGGCTCTTAAGTGAGT  
CCGTACTTTATCGCTCGAATAAGGCTTTAAACCAACTTCACAGAATGTTGATAACTAAC  
AATGCTAATAGATCTAGACGC

CTGCTTTAATTCTTCAAATTAAGTGATGATTCATTTTCATTTCCATTTTATTATCAAAGCTA  
CACCATCTTATATGAAGGA  
AATGCCACTTTAAAGAATTTATGCCAAACAATCTTGAAAAATACATTATTGCTTTATTAA  
AATACTACTTGATGCTTTCT  
AAATCCATGAAATTAACCTTAAATATGAGATGTAGCTTTGGATCTCACGACAAGGTCATT  
ATCATAACACAACGCGCTTAT  
GCCTTATGGGGCATACGCATTCTTCAAAACCTGACACGTTATAAAAGCACAAAACATTG  
AATATCACTTTGTTTATAAAG  
AAAGTTAAAGAACAATAAATACTTAAAAGAGTAAATTGCAAGTTTGGTCAAATTGCAG  
GTTTCATTCCCTAATTTCCCTAAA  
AAGTGTAGGCACCATTTTTGTGGGAAACTTTGGCTTGTATTTTCGTTCCCTGAGTCACAG  
TTTTTGACAAGGGCATTTTTTG  
TCATTTTACTTTGGACAAGGACGAAAACCTGCGACACAAAGTTCCTCATAGAGACGGTA  
CATGCACTTTCGAAAGGTAAA  
GACGAAACCTGTAATTTAGCAAAACCACAAAGAAAATTTTTGCAATTTACTCTAACTTA  
AATTATTCTTGTATATTCAA  
GTAAATAAAATGGTTGAAGTCTATTTTTTTTTTTTTTTTTTAAATGATTGAGTCATGT  
TCTGTCGCTTGAGATATAT  
TAAACAGATCAACTAATCAAACCTTAATCGATTAAACATGTCGATTAACTAACTGTTGT  
TGATTAATCAACCTTTAAAG  
TTTTCTCAAAGCGTATAATCTATAAAACGAGTTAAGTGGGACGATCAAACACCCGTTTA  
ACAACCCATTTAAATAACTGA  
GTTGAAGGTCGTGTTCAAGGATTGTGTAGACAGCTTGTGGATGACACATGATATGTCTAG  
TTATGTTTTTTTTCTTTCCTT  
AGAAACAACATGTCTGAACACATTTATATCATTCATCTAACAAATACTTTTAATGAGACT  
GCTTGAAGTCACAAAACCTAT  
CGATTGATGATTGATGAACATATCACTTTGTACGAAGGCTTGTGTATGTTCTAGTCAACC  
ATTTAGGAGTGACACCGCGG  
AAAAGTTTGTGACTCTCATTACTAAAATGTGACTGATCTTAAGTTCAATTCATGTTAGGT  
GCAAATAACTCTGAAGTGCA  
CATGACAACCTCTTTAAACGATAGGCTTTATCCATTTTTCGTCTGAATAGCGGTGAATTC  
AAACCTTATAAATTAGTCGG  
TCATCCTAATTTTAACATTAATTTAGTAACTGATTTTTTGTGTCCGCATAATATATTTTGAA  
ACAAAGAAAATAATATCC  
TTATATATTAGCTTAAAAATCACTTTCCAGTTATTTTCAGTTTACGCGTTTTGTGGGTACTA  
CTTACAAGTCATTACTCAT  
CACAACCGAATTTATTATTCCAAAGCAATAAACAATGAAAAAGATACCAAATAACGCGT  
GAAAACCTCACCTTTTGTATTC  
ATAATCATCAAAAAACACTCACAAACACACATACACAACCTCTTTTTCTTTGAACCTTCT  
TCTTCCTAGCTACAAAAAAAT  
GGCTATATTAACCACACTTTTTCTTGTCTTCTTTTCATTATTGGCCTTGTTCAACTCTT  
TTAAGAATACCAACAAAAA  
AAGTTGCAAGTTTATCTAAGCAAGATATACCCAAGGCTCAAACCTAGAAGAAAATTG  
CATGAATACTAACAAGGTAGTG

>CsCML43

TACTTTTTGAAATTTGACAAAAGTAAGGGTAAAATAGTCACAAAATACACAAAATAATC  
AAAATTTGAAAGTTCAGTACA  
CACAATAAGAAAATAAAAAAGTAAAGTACACATAATAACAAAATTGACAAGTATTATACA  
TTACACTTTTACATAATAATA  
ATTATCTAAAAAACATGACATTAAGTTGATTCAATTGTGGAAGAAATTAGACTTAACTC  
CATCATAATAATCAAAATCAA  
AAGGTAAATACAAATTTCAACATACAAACTTCATATTACCATAATAATACAATTATACCA  
AAAACAATCTTTTAAAAACA  
GAAATTCATAGTTTCATTCCAATAATAAACATAAGTTAAGCTGTTAATCCAAAATCCAAT  
ACAAAAACTGCATATGCTTA  
AATACTATACGAACTAGCCATTTTTCGTCGCAACTCGATCAAACCTCATCTGAAAGGTTC  
CTCACAAGCCACTTCTTCCCA  
CCACCTGCCTCCTCATCAGCCAGCCCTGCAAATCGCCTCTTTCTCTTTTATGCTATCGGC  
AGCAGGACTACTTAAACTCT  
TTCCCGTCTTTTTGGAACCTGATTTTTTAAACTTAGGGCTGCTTAAGGACTCTTCTCTTT  
TCTTAATACTTGTTTCAATG  
TGGTTTCGAATATTTTCAACATCGCCTTCGATACAGCCTTGCAACCTGTGGCGATCAAA  
ACTAAACCCACCCATTGGTTT  
TGAATGCACACGTACGTATAAGGGCTCGATCTCAAACGCTTGTTTATTTAATTTGAGAA  
GTAGAAAAGAATGCGGTACGA  
CTTTTATAGGATGATGATACAAGGAAAAAAGAAAGTCGATTTACGTTTGGAATCTT  
GCCATGCATGACATGCAAACG  
TACTATGACCGACTAATTAGCTTTTTTCTTCAGCCCATGACATAAACGGGTCAAGTGCTA  
AAACGGGTGCCACTACAACA  
AATATGTCATTTCTACACGCTTTTTTCTTCGCACTTTATAAAATGTGAACTTTTTTTTAAA  
GATATTCACACTTAAGAGT  
GTGAATAATTGTTTCAAATCCTCGCACCTAAAAATTGTGAAAATTTTCAATCTCACAC  
TTAAAAGTGTGAAGAATTATT  
TCAAAATCAAATCATCACACTTAAAAGTGTGAAGAATTATTTCAAATTTAAATCATC  
ACACTTCAAAGTGTGAAGAAT  
TGTTTTAAATCATCACACTTAAAAGTGTGAAAATATTCATAAAGCATCACACATAAAA  
GTGTGAAAATATTTGCTACAC  
CCAATTGGTTCACACGCATGCTAGTGTGAAGTTTTTTATTCTTCACACTTTAAATGTAG  
CAAGATGCTCTAATAAGTGT  
GAATATGCCGCTATTTTGTGTAGTGGTGGGTCGACCCGGTCAGTGTTGTATGGTATAGA  
TTCTAGTCCAAAATAGTTTT  
AACCCGTAGGATATAAATATAGTTATACCTTTTTTTGAACAATCCTAAAGAAACAAAATA  
AACAATGAGAGAGTTTTGAA  
ATATTCTTTTCCTAGTCAAAGTAAAAGACTAAACATTTGTCTTAACTAGGTTGTTTTATAT  
TTTTTGCATAAAATTCCTG  
ATGTATCTTATTTTATGCGGGTTTTAGTTTGGTAGTCTTGTTGGTTGTAGGTAGTTGTCAT  
TTATGGTCTGTCATAAATG  
TTTTGCTGGTTGTGTCAAGCGATTGCTTGCGGTTAATGTGGTACTTCAGTCACATTCCAT

TGTACTTAAATGTTTTTTGG  
AGTAATATATTTTACCGGGTGGAATACCCTTTACCAAAAAAAAACTAACCGGGTGCAAG  
GATATTGATCAATAGAAAGAT  
TTCAACAAAACAAAATATGGCACCAAATGGCTATGGATACGACTTCTACATTTTTCCCA  
TACATATGCCCATTTTTTTGTA  
CCACTACTAACCAGAATCTTATATATATCCAGCACAAAATATATTTATCATAAACTCATAC  
ATATATTTGTCTTTCTATA  
>CsCML44  
CTTATGTGATCTGGGCTGTTGAGATTTGTATTCAATTATTGAGTTTAATTGTTTCTTTGAC  
AATATTGATCTATGATATA  
TGATATTCTTTTATAAGGTTAGTCTATGTTTGAGTGTATAAAGATTAACTTTTTGGATT  
GTTTTTCGATTTATATGATC  
TGGGCAATTAAGGTTTAATTTTGGTTTTGGAGTTGGGGGGTGTGTGTTTTGGCTTATATA  
GCGGGCTTATGACTTATGTG  
GTTTTCGGCTTATGTTTCGTAAGTTTAGTTTTTGTGGCTTATTTTGAACTTTTCGGCTTA  
TATAAGTTTATTATGACAT  
GATAAGCTTATATAAGCCTGCAAAGTTTCAAATAAGTTACAAAAAGTGAGCTTATGAA  
GCATAAGCCGAAAACACATA  
AGCCATAAGCCTGTTATATAAGCCGAAACAAACACCCCATTAATTAGCTCTTTGATAATC  
TTGATGTATGCTAGTTTATT  
GTAAGGTTAGTTAGATATTGTCTCATTTTCATGTTGTGTGTAAAGTTTTGATCTTTAAGATA  
TTGTGATGTATTCAATTGT  
TTATAATCGAGTTATAGACCATCTCCAAGGTGTCCCCAAAGTGTGCGGAAGAGAGTAGTG  
TTCAAACCTTCTTCGGGTGAAC  
ATCTTGAGATGGCCAGGGAAAAGTATGGACACGGAATACCGGTAAAGCCGCCTACATC  
GGAGCCAAAAGGGCTCGACTTC  
CCTGGGTTACTTAAACACGGATCCTTCTCCGTTTACTTGCTTACTTGAATTGTCATTGAG  
TTATGAACCTAATCAGCACT  
TTGATAATCTTCATGTATGCTAGTCTTTCATAAGGTCTTGTGTCTTAGCCGATAAAGGTT  
CTATCTTTTCGATATTGTGA  
GGTCTATAGTCACTTATTAGCTTTAGGTTTTTTTGATAATCTTGATCTTTGCTAGTCTTTT  
CACAAGGCTAGTGTATGTC  
ATATGCTATGAACTTGTTATTTAGCCCATAAAGATGCATGTTTTTGAGATTTTGAGGGT  
ATGAACTTGTTTGTAATCAG  
TTATTGTGCGATTTATTTGATATGGGTAGCCAAAGTTGTGATCAAATATTGAACTTAAAT  
CAGTTACCTGACAATCTTAA  
TCTATGCTAGTATTTCTTAAGGTTACTCCACATTTTGGTTACTTATCGTGTACGCAGTGA  
ATATTTTGTTATATTTTGAG  
GTCTACAATTGTTTATAATCATATTATTGACGATTTATTTGATACTGGTATGTGAGTTATGA  
TTGGATCTATGAACTTCA  
ATAGTTCTTTCACTAAGTTGACCTATGTTGGTCTTTAACAAAGGTTCTTGTTTCTTAAAC  
ATTAAAGATTTAATGGTTTT  
TGATATCTTGAGGGCTATAATTGTTTTTTATCAGATCTTTGGTTTATCTGATCTGTGTACT  
AGATTAATTATTGAATATT

TGAACTTAATCGGTTTTTTTTGACAATTTTATATGTGCTGATTCCTAAATATCTAGCATTATATTTTTGTTCTGAGATATG  
AATCCTCTTGGTTGACTTTTGTTCCTGCACCCTTATGTGGCATCAAAATTTGACGGTTAC  
TAGTATAAGATGCTTTCTAT  
GACGATTTTATAGCTGATAAACTTTTTAAAGCTAGCCAATTTTGAATTCTTGAATGG  
TTATGTATAATGTGTCAAGT  
TTGTATTGAACGAGATCACCAATGGTGAAATCAACTTTTTGGCTGCAATGCATTCTGGT  
CTTTTGGATTGACAGAGACAT  
TGAATGTGAAATTTTTGTTTTTGGCATTAAATGATTCTTATTTGGTTTGTGTACTGTTAAC  
AGAAATAGTTGGACGTCAG  
TCATTTGATATCAGCAGCATCAGGAAATGGTCAAAAGGTTATTCCTATATTTTCATAAAGC  
TTTTATCCTTGTTTTCATGT  
TCATACGGAGGTAATCTAACTCATCTATAACCGTTGTTTTCAGGAATAATAATGAAGCGT  
TTTGATTTGCAACAAGTGCC

>CsCML45

ACACATATTAAGATCAAATGTGAATGTTTAAAAAGAGAAAGTGGCAAAAACATGAATC  
AATAAAATACGTGAATTAGACA  
TGTTTTTAGTCATGCTTTTTAGATCTTCACATATTGCTCTTAAATCAACACCGATGCACCT  
TCATCCTAAGAGCACTAGA  
TATGGTGACTCAAGCCAAAGGAAAAAAAGTGCGTCACGTCATGCCACTTCAACATTTA  
TTCTTTTCACTTCTTATCACTC  
ACGCATCAAAAAACCTCCTCACTAATCACTCAAGCCAAAACCTAGGTCTCACCATACCC  
ATCAAAACACAAAAAACAAGG  
GGCAGTTACATTTACGTCTTTACTAAAGTTGAATATTACATCAATGTCCTTGTCATTTTTG  
TAATTACGTCAATATCCTT  
ATCAAACTTTTTTAATTACATCAATATCCTTTTCACTTTTGAATTACGTCAATATCCTTCT  
CAAACATTTTTAATTACA  
TCAATATTCTTCTCAAACCTTTTAAATTCTCATACATATATCTCAAAATCAACATGTTCTTT  
CATCACTTGAGGCTAAATA  
ATAATTTTTATATATATTTTTTGGGAATATCAGAGATGAATATCAGAGATAAATAATAGTTT  
TTGAATTGAAAATCAATA  
TAATTATAATTTAATTGATTTCTAAATATACGTGAGAATTTAAAGTTCAGGAAAGATATTG  
ATGTAAC TACAAAAATTTG  
AGAATGACTAATTATAAAAGTGAGAAGGATATTTATATAAATGAGAATGATATTTACGTA  
ATATTGAACATTAAAAAAGA  
TATACATGTAATTCTCAAAAAAAAAAAAAAAAAAAAAAAAAAAAAAAAAAAAAA  
AAAAAACACCCCACTTTTAGCGCA  
AATCAATGGTTTTGCTTGACAATGACACAGGAAAGAGAGGTATGATAGCTTGGTTTTG  
GCTTAAGGAATAAAATGTCAC  
CTTGGTTGGCTTTGGTGAATGTGACCACACATGGTCATGTAATAAGCCAAAAACTCA  
ACAAGTAGTAGTATTATATTAT  
CCAATTAAAATATGGCCCATGAAGAAAACAAGAAGAAAATGTACTAATAAACAAATAT  
TAATATCTTCAAATTTTGTCA  
ATAGCAATACCTCACTTTTCTTGGTATATTGGGTCTATTTCGTAATTTACCTAACTTAATT

TCATTGGAATTTCCCCTAC  
AAAGAAGCATCATTCCTCCTACCTTTGTAACAGAAATAAGACTTGGTCTTTACAATTG  
GAAAATGACATATGAAAAAA  
GAAAAAAGAAAAAGAAAAATACAACCTTTCCAATTGCCTTTCTAAAAAGAACA  
ACAAACTTTTCCAATTATAGTAT  
GTTATCATCTTATAGAAAGATTTTTAGTGAAAATTATTTCAATTTTTCACATGTAACACCAT  
TTACATGGCAATCAAAGCG  
TTGGCGAACATTTTATGCAAGTGAGGCGGCTGCATAGGGCCAGTATTTCTATGAAACCT  
CCCTTTTATAGATTATCAAGT  
TATTTGTGCATGAATTTAAGCTTTTGGTTAAATTTATTATGATACAATGTTATATGATCACA  
ACCAAAATACAAGATTAA  
GAAAACATCAACAATGAAAAAGTCGACAATTCTTTATTTTTTGCATTAAAATTCGTCAT  
ACATGTGGCCCACTTATCATT  
ACCGCATAGGGTCTTCGAAATTCATTGGACAGCCCTTAATCCAAAGTTTATACCTTTTCC  
ATTAAGTTAATCTTACTACG  
TTTTATTTCTACGACATGTACATGTTGCATACATCGTTACATTTGTTAAAGTACGTTGCTA  
TTAATATTATCCTAGTCGA  
CATTGTCTGATACCAATGGTCAATTCCAAAAGCAAACACCCCTCCCTTTCCATGAATATG  
CCACTCATGGAATTGGTCAGC  
TTCCTCTTCATATATATAAACAATCCATACATCAATTCTCTTCATCACAAAAACAACATTC  
AACAATATCTTAAATTCCA  
>CsCML46  
ACGCTCTGATACCAATGTTTTCCAGGTTCTTTGCCAACGTTTGAGGATTTCAAGATGTG  
ATTGTAATTAACCATGTTTGG  
TTCTGGTTATTTCGAATGTAAACTAGGGTTTGTATTGAGATAAGAATGATAGAGATACA  
ATGAATATAAAAGACTTGTAT  
TGATATAAAACGTGTTGATATGCTTCTATTAAGAAGGCATATTTATACATACTGATACGAC  
ACTATCTAATCTAAACGAC  
ATGACTAGTACTTACAACGGTTACAAACAAACACAACGGTTTGTTTGTTGATAACCGTT  
TATCCTACTTAAGTTACAATA  
ACAAACGGGCTGAGTTTGGATCAAGTTTGTGATCCAAACAGTAAATAAGTTTCGACCCA  
CATAAACTAAACATAACTAAAA  
GTTTTAACTTAAACATGATACTGGTTCTTGATTCTTTGTGCGACATTAACATTATTAGA  
GGTTCTACAGTTTTAATCAT  
TGATATGATTTGGAAAAAAGAAAATTGATAAGTACATGTTTTAGATAAGAAACACTGAA  
TTTGGCATCTTCACTGTATGG  
ATATATTGTACATGGAAAAAACCAGTGATTATTATTTTTTTTTCTTTTCTTTTGCAGTCA  
CCGTGAGCGAAGTTGAGTC  
ATTGTATGAGCTATTTAACAAGTTGAGCAGTTCCATTATCGATGATGGCCTTATTCACAA  
GGTATTTTTAAGTGATGATG  
ATCTTCGAAACTTTTTAGGTAATCAAACCTACTTATTGAAAGAAATAGCGTGCAAA  
GAACAACGTCTCTCACAACCG  
GCCTTCATAGAATTGCCGAGGTACACTAGTGCATAGTAAAAGGAACACGCGAGCGGA  
AATGAGAAAAGAGTGAAGAAAT

GAAAAAAACGAAGAGAAAATTGGAACATGTTAATATTATCATAGAGGAGTAAAACGG  
TAATTAACCAGAATATATATTT  
ATCAAAGATAAATATATTTAAATATAAAAAATAAAACCACAAACCCTAGGACGTTTTT  
GGATCGGGTAAATTGAAAGAA  
ATTGGAGTAATCTGGAATTAGAAATCCACCTCATGCATGGTTTGATGACAACCTCGGAGA  
AATTTAAATGTAAAAAGGC  
TTTATGTAAAGCAAATATAAATGCACAGATTGAGCAAGGAATTTTAAACGACACGGAA  
CACATAAGTTTTATAGTGAGAT  
ATTGGACAAAATTTCCATTTCTCATTTTATTCTGAATGATTTTAAATCACTATTTTGACTTC  
TTTCTTCTTCATTAATATG  
CTTTTTAATTTTCATAACTGCTCCATCATCTTCTTCGGCTAGACCCCGTTCCTTGAAATTC  
TTGCTTTACATCTCAATAT  
CTATTCTTATAGTTTCAATTTCTTTATGAACTAACTTTGGAGTTCACCCAAAACAATT  
TTGGGTTTAGGTAAAATAAC  
ATTTTTTTGTTTAAACAAAAACGATTTTATGTTTACATATAAGTGAAATCGGTTTTATAG  
AGAAGTGAATCTGGATTTG  
CAAATAAACATATTTGTGTTTACATATTTGAATTTGGTTCCTAAAAACTCGATTTATGGT  
TTAAAAAATCAATTTTCT  
CTACATCATAACAATCGTATTTGGTTTACATACTGATGTTATAGATCGAACGGAAATG  
AGAAATTGTTTGTGTAAC  
AATCTTAAAGTGCTTGGTGTGGTCGTGTTATTCCTTCGCCAAAAGACCCAACAACAC  
ACCAACATGTTATAACCACGGCC  
ACGCTACCTATATAGTCATTTGTCTGCCATTGGTGAATTAATGGGTGCAATGGCTGGTGC  
CATTTGTCCCACTTTTTTTC  
TTTTTCTTTTTTTTTTTTTTTTTTTTTTTTTTTGTGCCAATAAGTGTTATTGGGTGGGAGA  
TAATGTGGCACTGAGATGA  
CAGACGAATAATGTATTGTTGGTATCTCCACATCAAGCTCTCTTATCAATGTTTTTATTG  
GTTCTTGCGGATGAAGATA  
>CsCML47  
AACGAAAATAAACCTGGTTGACAAAGGTATTGACCTTCACATTGTTTTATGTTTCTTTT  
GTGAAGATAATTGTGAATCGT  
CAAACCACATTTTCATTGAGTATAAGATGGTGAACCCGATTTAGGACTCTATAATAGATG  
GTGTAAAGTCCATGTTGCTT  
TGGTTAGATCCCCTGATTTGTTGGAGTTATCGGGTTCAGTTGGTCTAGCCTCGGTGTTT  
ACAAAAGCCTTTGACGTTGTT  
ATTCGTATTACAGTATAGTATTAGTATTACGTATTACGTATGGGTGATATGGAAATATCG  
AAATGGAAAGATTTTAAA  
AACAAAGATCTTGGCATCAAAGCTGTGGTAACGGAGATCCAAGCTATATCTCACCTTTG  
GATTTATAGCAGAAGTCGCGG  
GAATATTGCTAACTGAATGATTGGGTGTTATACCCTTGTGTAGGTCCTATCTTTCATGAC  
TGTTTGGTTTCATGTCTTTG  
GTGTTGTACTTTTTCTGTGGTGTATGTTTGGGTGTTTCTTCTTGTGTTGTCTAGCTTC  
TTGCCACTCATTTTGTGTT  
TTTATAAAATTTGTTGTTTCGAAAAAAAAGATTTATGTTTTTCTTATTTTTTCTTCTTG



TTTTACAAAGATGCAACGA  
AAATGTGCTACAAATTTGTGACTTTAACACAGATATATCTATAATAAACATATTCATACAC  
ACATTTATCGATTTAACAT  
AAATATACGATTGACATTATTGAAACATTTAGTGAGTTTTTTTTTTTTTTTTTTTTTATAA  
CACCGTTCGTACATTTTA  
CCAAATGAAAAAACGTTTCATGATTTCAGATTTCAGACTTCTCAAGCAATTTTAAACAGTA  
AAATATGGTAGTTAGATTTAG  
AATAAAAACGTTTTATTGAAACAAACAACAAGTTTGACACTTGACGGTTACATGGTTT  
GATGTATACATATGTTTGCTAG  
CTTTTATAATGATAAAAACAAATGAAATAGAGCTTTCAGTACAGGTTTATTATTAACTTT  
ATTAAACGTTTCATCATTCAT  
GGGCCTCAAACCTTTCCTTTTTCGTTTTCTTCCTAGCAAAGTTGCAATACATTGAAAAT  
GATTGCTTTTTTGTATTGCT  
TAAATGGTTGTTTTCGTTTGAACTTTTTGATATTAATCTCATATAATTTTAGATTGAGAA  
TAAAAGTGATTATTGCAA  
CTTTTTTTTTTTTTTTTTTTTTTTTTTTTTTTTAAAGAATAAGTTATTAAATTGATGAGAA  
GTTTCATGCTGTCTTTTTC  
TTATCAATTTTAGTAAATGTAGGTTTCCATTATTGAAACAAGATGGTGGCTTATGATAAA  
TTCAAAGTTAGGCCATAAT  
ATGTTGACAAATATTCTGCAAGATGTAAATTATGTGGTCCTTGATAGTTGATCTCTTCTT  
AATGTCTAGTTTTATCCAAT  
GTTTTAAAAACTGGGTTTTAATCGACTCGGTTGAGTCATTGGCCACCGGTTCAACCGTG  
GGTTAACCCAATTTTCGATT  
ATTATTATTTTTTTTCGACCAGGTCAACCGATTTTATCATCAAATTAACCTTGTTTCTATA  
AATAAAATTGAAAAAATC  
AAACCTGACTGGGTTTCAAGACCTGAGTCAATCAAACCCGACGGGTCTAATCGATTA  
ACCCGGTTTTAAACCCGGGTT  
TTTTTTTACTTGTTTTGTGGCCGGTACCGATCTGACCGGTTAAACCGGCCGGGTCAAC  
CCGGGTTTGAAAACATTGGTT  
TTATCAATTGTCTATGATTTGGTAAAGAGTGAGCCACGTCTTCCATATTTCTCTTGAATG  
TCCGTGTCTTTATAACACGT  
GCTTATATCCCACTTTATATAGTTATATCTTACACAATATATCCAAAGTGATCAAAGGCC  
CTTTAGTGATTGACTTATT  
TCAGTTGAATATCATCAAAGGGTTATTTATATTAAGTGATCTATATATCAATCTTTGAA  
ATTTATATATTCAGCTGG  
>CsCML48  
TCAATGAATTGAATATAGGACTTATCCCAACTACATGATTTTACTTTATGGATATTGTTAT  
TAAGTAAATCATAAATAGT  
TATCCTCAGACTTGAGATACCAGATAAGTGTCATGAATGTAGTGCACTTCTGTGGAACA  
ACTTAACGCTATACGTAACGT  
GTAGTCATAAGGGTTGTTTCCTGAAGTGTTGCAAAGTTCATGAGTTATTCTTGTAGTCA  
AGATAGAATTTGTTCCCTCAA  
AATTTATTTTGGAGTTTAATACTGCTGGGCCCCTCGTAGGGTTGACAAGATGTTTGCCT  
GGCCACGCCCAAAGTTCTCCC

CTGAATATGTTTCAGAAGATTTGGTAATCTTGCTCAATCACTAATAACGAGAAACAGAAT  
AGTTGGATAAAGAATGACTTA  
ATTCCATATCTTTATTTAACATGGTATTAGAAACAAAAGGATAATAATAATGAGAAATCA  
TTAAAAGGTTTTCCAGGAGC  
CTTGCTCGAGTTGTACTAGAGGCATCGAAGTGTTTCTAGACGCTAGCCGAATGTGATCA  
CTCTATTAAGATATATCCAAG  
TGGGAGCTGTTGGTTTTATGGATATAAATTAGTAGACGTGAGTTAGGATCGAACTCGAG  
ACTATGGGATTGCACACTTTA  
CGTATGAGAATTTAAAGTTAAATAATTAAATATAAACGTTGTATTTATTTATTTATTAAC  
GAAATAACTAACGGACGTT  
AAGTAATTAATGTAATGGACTAACGGGCGTTAAAGGTATTTGGAAAAGGACTTAATTGC  
AAAAGTTGGGAAGGTTCCGGA  
ATCCCTATGGGATATCCAAACCGATCGGCCAAGGAGAGAAAGAAGGAAAGAAAAACC  
AATTGTTACCAAGTTTGCTTG  
GGTATATAAACAAGGCTAGGGGTTTTATTTTCCATCTCTTGCTGCTCATTAGCTAAACCC  
TAAAAACGTTTTGTGTGTGT  
TTTCTTCTCCAATTCGATCGTACATCACCTTTGGGTGTCGATCCAAAACCTTTTCCACTAA  
CCAAGTTATTTGTGTTGATA  
AAACTAGCATTACTTTAATTCGGTTTAGTACGTGTGTATAAGAACATAGTAATAACATAC  
TTTTGTTATTATCTTGGATT  
GAATTATAAAACGGTAAGGGGTAATTCACATAATCCTATAAACCTAATTAGGGTTCATC  
CTAATTGCTAGTTTGTGGAT  
TTGATTCTTGTTCTGGCTAGAATCAAGAAAGGTACGCATATTCTTCTTATGTTAATTAATTA  
TTCGTTAATCTTTCCTATA  
CGCTTCCGCTTGAATACTTTGATGTTTTGTGGTTATTTATTTGAATGTCATGTTATATAATT  
CCAACATAGTCAACTATT  
TTCATTATTTAAACGTATTGCATAGCTTTCCTGCTGACTAAGTTCGTGGATTGAGTTGA  
TGCTTCTAGCATATTTATTG  
AAACTAAAAGGCAGTTGAGGTGCTAAACTGAACCAATTGTTGACGGGTCTATATATGA  
GTTCCGGAGAAAACGAGTCAAAT  
ATTTGCATAGATAAGAAATTTGTTCAATTTGTAAGAACTTGCAGAAAAACTCTTTTATTTT  
TCCAAAGTAAGAAAGAAGTT  
ACTCTAAATGGTGATGCGCTAAATACTCAATGATATGATTCTTACTCATCATATATTGAAT  
TTTCTTTGTCCATATTTGT  
TTAATTTTATAGAACATGCATGTTTATGGTGTGATCATGAACACAACAGCTTTTTTTATTT  
TAATATTTTCATGGAAGTT  
ACCAAGAAGCTCTCTAGGCAACTTCGTTCCCTTAGAAAGTTAGCAAAAAGGACGACA  
ACAAGTCAATTTCCATCAATTTA  
CTTGGAATATAATTTAAACAAGTGAGGCGGTATGTATCTTCCTCAATACTATGATTGTTA  
GGCCATCTTTTACAATGAA  
TTATCTACAAATAGCACGAGTTACCAATCCAGAGACACAATTAGACTAATTAACCTCTCT  
CTTGCAATTATTTTCATCTTAT  
>CsCML49  
ATAGAACAAGTGCTACAAGTTATGAGGTAAATCAAATCGTCACAAGTGCATTAAAATCT

TCGTGTCAATTTGGTCGAACA  
CATGTGTCGTAATGTTTAAGTTCAGTTTTAAATGTAATGTTTTTAATTTATTAATACAATT  
TTTTAGTTTCGCTTGTTA  
CTTACGTTTTTAATTTATGAATAAAAAGTTTAATTTAAAAAAATAGGTTGAAAGGTGAG  
TAAATATAACCATTAGAATTG  
AAAGGTGAAAAAGCGTGACAAAAAATTAAAAGAAAAGAGAACTGAAGTAGCGTTG  
ATGTAAAAGTTAGGGTCCGTTTGG  
TACCATGGGTAGGCAATTTGGATTTGACTTAAAGTTAAAATTTAATGTTTGGTTGCATA  
TTTGTACTATTCAGTTTAGA  
CTCAAAGCCAAATAATTGGTCATTTAGAAAAGTAGTATGCACGAGCGGGTTTACACGA  
ATTTCTTGGTTTTTGATTTTCA  
AGTGCGCCCGTATATTACATGTACCACTAATTTACTTTTTTATTATTGTTTTAGAAATTATT  
TTTAATTTTAAATTATAT  
ATATTTATTTTAATAATTTATTTATTTTATATTATTTTCTCTTTCTTACATCAAATTCAAAC  
TCAAATCCTAATCTAA  
ATCCAAATCCTAATCCTAATCTAAACCCATCTACAAACCAAACGGGGCCCTCAATGTTTT  
GAAACCCGGGTTCGACCCGGTC  
GGGTTAACCGGTTGGACCGGTTCCGGGCAAAAAACGGGTAAACTAACCCGGGTTT  
CTAAAACCGGATTAACCGGTTAG  
ACCCGCCGGGTTTTGAGTGACCCGGGTCAACCAGGTTCTCGAAACCCGGCCGGGTTT  
GGTTTTTTTCAATTTTTTTTATA  
AAAACCGGGTTGACCCGGCGGTTGAATCGGGTTAACCCGGCAGTCGAACCGGTTATTT  
TTTTTTAATATTTTTTAATGAA  
AAACCGGGTTGACTCGGTGACTCGACCGCAATTATAAACCCTTTTTTTCAAACATTTGT  
AAAAGTACTTAGGGTCCGCTT  
GGTTCAAAGTGCGGAAAGGAAAAGGGAAAGGGAAAGGAATGCAAAGGAAT  
GAGTGAGGTGGGTAATCAATACGT  
TACCCCCCAATTTACTCTATAATGGTTCATTACCCACTACGGGGTAATCAAAACCTTACC  
CCTCCCCAACCAAGCATCAA  
TTTATTTGTGATGTGGGCCCTTTTGAATACTTACCCATTCCCCACCCCCCTTAACCCCT  
AACCAAGCACGCCCTTAGTA  
ATTATTTGTAAAGGACGTGAAACATTATTTTCATGTCGACGCTTTTCCCCCTCCAATAAGA  
CAATAAATTATTTATGAAAT  
TAATTGATCTTTACGTCTTAAATATCATATCCATAATAATAATTAATAATGATTATAATTTG  
CGGTTGAAAGTCACCGAA  
AAGGGGCTTCATTTGACTTACCATCACCTCTAACATCCTTTTCAATTCCAACAATCTCCA  
CGACCAAATTCAACCTCCTC  
GTCAATTTAATTTAATGTAAGTTTTTCATTTTATAATCTCCATTAAAATTCATTAATCCCATG  
ATTAATTAGTCCTAATTA  
ACATACCCCATTTGATTATTTGATTAAATATTATGTTTCATATTATGGAACATGATTATTATT  
CCATGTAATAAAGTTGGC  
TTTAAAGTTAGGTTAGCATATCCACTGAATCAGTATGTATGGATTTTATTTACATTAATAA  
AAAACATGTTTCTTTATTG  
CAATTGCTTTTTGAATATTATTATTTAATGTCAATGAATTGGTTGGGTAGCATCTCCACTG

AATCATTATTAATTAATGT  
TGGGTTGTTTCTAGATTGTTTATTACAGGGATATAACTCAGTGGATTGGTTTTTTTAAGA  
TTGTGATTAAAGTGCTGTTGG  
TTTGGAGGGTTGTTTCGAGCATATGCGACGAGTATACGTAAATGTGATAGTGCAGAAGTG  
CGTATTGTTGTTGGTGTAATC  
>CsCML50  
AAGAAAGTTCATGCTTTTCGTTATTACGAGTTATTATGTTTAAAGAGTTGGATAGCATAG  
GTCTGTAGATGTATTTATTA  
AATGTAAACGTTAGTTGCATGTAAATGCTAGTAGAATTAGCATTTTTTAACTTGAAGTTT  
TAAAAAAAAGCAAATGTTAG  
TTGGTTGTCACGCAATCCTTGTATACAAAACGCTACCCTAGACGCGAGTTGCACTAAAA  
ACACTCACAAAAGCTCGCTGT  
CAAACATCACATAGCAATAGATTTGGGGAAGCATATAAGGTAAACAAGTTTTGTATGAA  
AAAATATTGAAGCTTATCGAG  
AACTTGTCTTAATATCCAAGTCGACAGAAAGAACTGTCTACTAGCTAATACCCACATG  
CAACTATGAAATATTACTTGG  
TCGACAAGTTTGTAAAGTTCGATGAGCACACGAATACACGGTTTGGACCCACTTGTTAC  
TCCATATTCTAATCAGTGTTGT  
TATAAGTATTTTGC GGCTTTTGTTCATCTATTCACCAAAGTCAAATTTTGCCTCTTAAAAT  
TACAAATATATAGTCAACT  
CGGCTGTAATGCAAATATAGCCCTCTTCATATACATGTTCCACACGCTATAATTATCCCTC  
CGTCTCATAATTTAACTCC  
GTTTTAACTTTTTGGGGCATTACATATATATCCTTGCAAAATTCAAAAATTACATGTATA  
TCCTTTTGATGCATTAAAA  
GCATTGTACTTTATGCATCAAAAAGTGGTAAAAGGGATATATATGTAATTTTGAATTT  
ATAAGGATATACATGAAATT  
ATGCCTAACTTTTTAAATCAATTTTTTTTTTTTAAATATTTTACGAAAATTATATCAATGCA  
AAATACATTTAAAACACAA  
TTCATTCATATATTTTGCATCAAGTTTATATAATACAAATAAAAACATTTAAGGTAAAG  
TTGAATTCAAAAAGTATAA  
ATGAACTTAAATTTTGGGACGAAGATAATATATAATTAGACGTTTTTAAAAGTTTAGTAT  
ATGAATACCTTTCATATTAT  
GAATTTAATTTGTTAGAAAAAAGAAAGAATATATAACATTAGCTTGAGTATGTGTTTTTC  
TTTATATTTTGTTTGTTAAT  
TTCTTGAATAAAAAGTTGAGCCACCCTAACTTGTAAGGAGTAAAAATTATGTAATGAA  
GGGACATATTATAATTTTGT  
TTTTAGCTAAAATATATATCTGAAAATATCTCAAATACAAAGGGGTGGCATTAAATTAAT  
CGAATGTGATATATAGGGAA  
TAACGAGTGTTGGAAGACCCACGCGATGCAGCGGGATTGCTTAAAGGACGTGCTTTGC  
AACGACACTTAAATCTCAGGGG  
CTGTTTTTGCCAAGTTGCGAAATATTATTAATGCTATAGGACTTACTTTGCAACGACACT  
TGAACCTCAGGGGCTGTTTT  
TGCCAATTTGACAAAGTTTGCAATTAATGCACTTGGTTGTGCTACAGTACTAATGTTTTG  
CTTGTTGTGCAAACTTATG

TACGCTTTTTAGTATTATATACTAATAAATTTTATATTTTTTTAAACCGAGACTGTTAGACA  
ATTAGATTATTGGCTCAA  
ATTTGATCGTGGGTTTGAGGTTTATTAGATTAAAGGTTTCTGTTAGCTTATTGTCAAAGC  
TATAGTTTATTATAAATAAA  
CATGCTGCTCTGCTATGTAATTGACAAGTGATTCCATCAATACTAATAATGTTTACAGAG  
ACATATGCAAATAAAAAGTC  
AAGATATAATACCAAGTTAAGGAAGAGCCCGATATTATCCAACTTTAAAATTAGAATAT  
AAAGTCAAACAAAATGATAA  
GGACAAAATGTACGAACAATACAAAAATAAAGTCAAAAAGAAGAATGAATACCAAGTC  
AAATGGCACTTTTCGTAAATATCT  
TAGCTTTCCATATTTATATTCACACACCAAAACCTAACTTTCTCACTCACAATTCGTATCT  
CATTATTTCTCCAAAAACC  
>CsCML51  
TTTACTATTCGATTCATGTATTTTCGTACCTTTGAATATTGAATTGATTTGTATGGTTAATAT  
GAGTGGCTAAGCACCTCT  
TGGTGCTGGCCTAGTTATGATTCCTTAATTGTTTTGTTTGC GTTTATATTACTTCCATATAA  
TTATTTCTAAGTGTATGC  
ATGCATAGTTTATTGGTAGCCACCCTTGGTTCGGTAGTTTTGAATGGCGGTAGAGGCCA  
ATTGCCTAGGAGATATGACCA  
ACTGACCCTAGGTGAGCGGACTGAGACGGGAAGGGTAAGATATGACCAACTGACGAC  
CCTTTCTACTTGTGCGATTTGAC  
CAACTAATCACCTACCGTTTGGATGACATGTCAAATCTGTTGATAGCTGTAATGATTTGC  
TCAAAATTATAGGGTCTGCA  
ACCACCCATGCTTAATTGCTGTGTGTTGTATGGTCATCAATTCACCATGGTCTATTCCTT  
GTTGGAATCCAAGAATTGGC  
TAGCCCACAAGTATATGGCTTGTGGTAAAGGCAACTGCATCCATATTTGGTTATCAATTC  
ACCAATTCTAAGAATTGACT  
AGTCCTGAGCAAACGGCTACAGGTAAAGACAAGTCAAATCCGTTTATATAGTTGCTGAT  
TTGCTCATAAATCAGATGGTT  
ATCAATGTACCATAGTTTACGAACCTAAACATCTGGCTACTCCAGTAGTAATGGCTATTG  
GTAAAGAGACATCAAATCCA  
TTATTTTCAATGATTCACCTCTCACAGGAGTTCACACACCTGGAAGTGATGATAATAGT  
ATGCAACTAATAAGTTTTGAT  
GTACATTATGTCATTTGTTGCTGCAAAGACCTGGAGCTTCAAAGTTTGATCATCATAGA  
GATGAGATTATTATTGGTTCT  
TTGCTACTGATGTTTGAGAACAATCCTCAAGTACTGAAGTCTCAAAGATCTTTCAAGG  
TCAGGAAACTGGAACCTTAACC  
AAGTCAAATTCCAGTTTAGGGGAGGATTGTTGGGAATTATGTGAAGTAGGAATTCTGCT  
GTCATTACTGCCGAAGGTTTC  
TGCTGAAGTAGAAGCAGAATCTGCTGAAGAAGTGATTCTACTGAAGAGTAAAAGCGTT  
GCCGTGTTACTGCTGAAGGGTG  
AAAGCTGACTAGGATCAGCATGCGCTTTATGAATTAAATGCTAACTCATTATTATCTTTG  
AACGGCCCCGAGGTTAGCATG  
GGTTTTAATTGTACTGCTCAATATAGTTTAGTGTATTAGTCATTAAATGCATGCTTGCATG

CTTAGTCGATTGGGTAGTA  
ATAGATTAGGGTTCCTTGTTTATAAAAGGAACCTCATAGTATGTAATATTGATCAAATCT  
GAAACATAGAGTTTCATTTA  
ATAAAAAGATCCATAGAGGATCTAAGTGTTCTTAGTTATAACATCTTGTATTTACTTTCC  
GCTATATAATACGAGTGTTA  
GAGACTGTCTATTAGTTTGTTTATGATTACATAGACAACACTAACGATCCACGAGTGCTT  
AAGATCTGTCAAGGTCTGAG  
AGTTTACAACAGCTTTACCGAATACTACACTACACACGACCGGGTACACTGCCCCGTTAG  
TGCACTAGGGTAGACCATAGG  
TATAACGAGACTTTATAAATATTAACCTGGTCAGTAAACTTGCATCAGTATCTTTCT  
TAGCCAATCCAAGTATGCAC  
GTGATAACTTGAGTCAAGTTGGGGCAATATGAGCCATTGGATTGATCCAAAATGACTC  
AAATCAAAAGAACTTCTTTTG  
ATTTGAGCCATTGGATCAAATCCAATGGCTCATATTACCCCAACTTGACTCAAGTAACTT  
GAGAGGATCTCATCCCCTAA  
AAAGTTTAAAAGCAATTGTTGAAATAGTCAACATTTACGAGCCCACTTTTTGTAAATTA  
TTTCCCAATCTTTTAAAGCAA  
ACTTTCTTCATAGTAGTTGTTGCACTGGTCACCAAATTCACCCCAAATCACACAAATCC  
AATTCAGGGGTTTTTCACAAC  
>CsCML52  
CTCATTTTAGTTCTATGATGTATGTAGGTTGTTTTGCTTAAATAAATTCCAAGTATTGTTG  
TTATAAGAATTTATGGGCA  
TGTCATAATCCTTGTTATTTTGGATGTAAAAGGTTGGTTTTTCATATATATTTAGCATT  
TCACCCAAAAAAAATAATA  
ATAAATAAAAATCATGAGACATGCACATTTATTTTATTAGCAATTATACACGCACAAAGA  
TGTTTACAGTTTCATTGCCA  
AATTTACTTCTTTTTTGTTTAAAAACATAATATTACCTATTATTAGTTATGAATATTCTCTT  
TTAAGATATACTCATGAT  
TTCAGGAGTTTTTAACTAGTGTAAGTAACTTTGAGATAGAGCTATGTGAGATAAAA  
CTATGAGATAACATTAATTTA  
TAGATAACAACCTTATGCATTCTATAGAGTTATCAGTTTTGTGATAACTTAGTTTATTTGGT  
TAAACATCTATCAAAGGA  
TTTGTTATTCATACGCTTCTCATTTGTTTAAACAAAGATAAGCATACAAATAAAGGATGA  
CGTACACTAAACGTACATAT  
CACTTTATTCTCGTTCAATTATTTGTTGTTGTGATTTGACACCACATAAAAAACCTTGT  
TTATTCTAATTTACAAAGAG  
AAAGTAATAATAAGTAATAATAAACTATTTATTTATGCGAATAAACTACCATAAGGT  
AAATGATGATGATAAAAAG  
TAGGTAGCAACCATCCGGTAGTTCGTAGTTGGGCACGTGATCCCTCACTCATTGGGACT  
TCTTCTATTTTATGCACCAA  
TAATTAGATTAGATTCCTTAACTTTTAGTATAAAAGGTTTCCTCAAAAAAACAATTG  
TGTTGTTTGTTCATTTCGG  
TATATACTAAAAAGGTACGATTCATCACCATCGTTATTATTGTAGCTCACTCCAACAA  
TCTTTTTAAGGTTAGATTTA

TGTCATTTATATGTTTTTTTTTTTTTTTTTTTTTCCATAATTTAATATCGAAAATCTTTTTT  
ATTGCTCTTGCTGGATA  
ATTTGCTAAGCTTATATGAATTTATATGTTGAATAAGGATGAACTTGTATATGCTGATT  
AAGTTATTCTTTTATGGTT  
GAATAATGATCATGTATTCATTATTGCAAGTAAATAAAAGTTCAAACCAATGAAGAACC  
TTAATTTGTTTTTTTGCATGG  
GAGCATATTTATTCAGTTATTGTAGTCAATCAAATTTCTAATCTTTTAGTGTAATCT  
TGAATTAAATAATTTTAC  
CACAAAGTATATATGTAACACTAACTGTGCTGAACTGCTGATCTATATGTACCGGTTGTC  
ATATAATCAGTTGTTTGATA  
CTTAAAAGGTTCTTGGAAGTATGTGATTGTAATGATCAGTTTAATGAATCTTTGGCATTG  
CTAGTTTAAGTGCTTATTTG  
CCATTTTAAAGTAAATAAGCATTGAAAATAAGAGGTTCACTACTGCTTATGGCTTTT  
TTAAAAACAAATTTTGAATAA  
GCAGTCCACTGAACACCTCAAAACAACCTTTTACTACTTAGTTTTCGAATTAAAAGCAA  
CAAACAACCTCTTATATGTGTTT  
ACAGATAGCTGATATAGGAGATAACAATAACATATAATCACATATAAGAACTAAATACT  
ACGTACTAAGTATTGATCAT  
ATTGTTGATGGAAAACTGATTTCCATGTACTTGTGATATCGTTATACTTGGAAATTTTTTA  
TCTTCATGTAATCTTTTAA  
TAGCAATGTTTACTAATGAACCTTTTCCTACTTCAAACGGAGATAGACTGATTGATCCG  
CATCCAATTCGCTAAAATTTA  
TATCTCATCGGCTACCAGAAATGTTTGAAAGGTGACTTTCTATCAGCTGTTTAAGTTTCA  
TACTTTGCTTATGTGTGAG  
TCTCGATTGTCTAAGCCTTAGACTTTTCCTTTCGTCATACTTTCAGTAACGATAATGGAG  
TATTTTGATATACAAGTGTC  
>CsCML53  
TCATCTATGATAGATTCATTTCTCTTTTTCTTGGAATCCTATGGAGTATGGACAATATCCA  
TATTTTCAATTCATATAAT  
ATGAACCCCTCATTTTAACCAAACACTTAGAATCATTACCACTATCATTTCTTCATTCGG  
GATACCAAACGCACCCTTAT  
TTGTATTGAATCCCTAGTTAGTAATGACTAAGCGAAAAAATGAGTGAGCCTTGAAATT  
TAGAGATTTATTTTGATTTTG  
ACTTTGACTTTGCAACAGAAAAGAAAAGGATATCAAATTACTAAAAATGCAATAAAAC  
AATAGTGAAAGGGCAGAAAACA  
GTATATATCTTCTGATTCCACAAAATTCAACACACGATTTATCTCTTTAATTCTTTATGT  
GTTACAAATATCAACAAG  
ACACAAAGGTTACACAAACCCACCACGACACTTGCAATACAATACTACAATAG  
TATTACTTAAATCCCAACTGCT  
GAGATCGACCTTTGTTGGTGGGTCTTGTTTATTTCTTTATTAATATAAATTCTTGTTTTAA  
TCAAACAACAAAAAACCT  
GATTGATTTTGTGTTTTTCATTTGTTTCACTTTTGGTGAGAACTGCTTACTTTTGCTGA  
GCTATGTTTATTAGTCTATT  
GATTATCTGAATAGGTTTTTGGTTTTTGTATTTTATGGCAGAAATGATGTTAGAGGGTGTTT

TGGATTGCTTATTTGCTTCA  
AGATATAAGCTCTTTATAAGGTGATAAGCACTAAAATAAAGCAATCTTAAACACCCTTTT  
AGCAGCTAAGTACCAAAAATA  
AGCAATCTTAACACCCTTTTAGCATATAAGCCCTAAAATAAAGCAATCTTAAACATGACC  
AACATTTTGAAAAGGACGGAA  
GACATCCAGATACCTTATTTGTTAATTTTCATAATATATTAATGCCCATTTGTTGTTTGGTTA  
ACTAAAATGTTGTTGTTT  
TTGTCATTATTGCATAAAAATCTATGCTTTGTTGTTTGAAGATAAAAATCTGCAGTAGATG  
CTGCTGTTCTTTAAGATGTT  
ATTAAAATGATAGTAATTTATGTCAACTAGGATATTTGTTTAGATTTTAGTAAACGTACTG  
GTCCTACTAATCAAATGTT  
TGCAAATTGCAACTTCAGTTTATATGTGTATTTGCATTTGAACCAATTATGGTGGTTTGA  
AGCGACTATAATTAGTTTTA  
AGTGATTGTGTAAATTGATTATGATTTTCTGATTTTATCTTTGAATATGGTAAAAAGTGA  
ATTTATGATCCAAGATAGA  
CTATATTGTAGTTTCATTTTTGAGGATCTGTGACTAATTGATTAGGTTCTTGCACTTCATA  
AACTTTAAGATCCTATCAA  
GATTCGGTCTTTTCTAGTGCGGTTTGCATTTAGGAGCATTGGTTAAGAAGGGTGGTATG  
TAATTTTGGGTGCGCGAAAAC  
CTGACCGATTTAAATAAAAATTGGAGCATGCGGGCTGGTTTGAATGGTTCTGGTTTTGG  
ATTGAGTGGACCAAATCCGT  
ATATTTGGTTTGTTCATCTCCAAAAGTAGAAAATGATCATAATGTTGTTATTTTTTAAGT  
TGATTACAACCACTTGAAG  
AATCAAAACAAGATAAATTATTCGGGGTCTTAAAGTTAGGGATAATTTGGTGATTTTAC  
ATCTGTCCGACTAATCAAGTT  
TCGTGTGGCAATGGATTAGCTAGATAGATGTAAAAGTGCCTAACTGTCCCTAAATTTTA  
GAACCTTATAAATTGTCTTAT  
ATTGGTTCTTCAAGCTTATCCCAGTCTGACCAATCTGATAATTTAAGGGTTGAATGATCA  
GAATTGTTAACAAGTTATTA  
CCTATACATATCCGTGGATATTCATTCCGCGGAAATGACTCCTTTGACAAAAGTCAAATT  
AGGATGATTTGTTGCAGATA  
GTTAGCATTTTGTCTGTTATTTCTTGTACTATTATCGGTGCTTCTTTGATGTTTAGCGAAC  
TTTGTATTACTAGTTGACA

>CsCML54

CAATGTCCTGGGTCAAGGAGAATCGTCGAATACGCTTAAGTAAGGTGACTGCATCTTTC  
TCAAGTTCTCCAAAAGAAGAA  
AAGGAGAATGGAAGAAACCCATATCCAATATCCGCACATTTAGCATCGTATTTGACCCG  
TTTACGCTGCGCAGCATCACT  
GATCGCTCGCCCTGGTATAAAAATCAATCAAACCGGATTGCGTCAAAGGCGACGAACCC  
GTAAGATCAACACATACGTGCG  
GTCCACTATCCCAAGAGTAGAGTAATATGTCATCCGGACGCAAGGATCTGTCCCCATCT  
CCAAAAGCCCAATATCCACC  
TCCTTACGAGCAGAAATCCCTGACCGAGAGCATATATCAACAAGAACATCGCGTACAA  
GGTTGTGACGATGTTTAATGCC



AACAATACCCGCACATGAAACAGCGTGGTCCCGTAAATATCTCCAGGAAAAACCTTA  
GAGTAGGCAGAACACGGTACCT  
GAACAGTGAAAAGAGGAACGCCAAACGATAACACAATACACATCGATAAGCCCTAG  
CGTTCATAGTTTGCCCAATCCA  
GATATCGGAGCCACCCTAAGCCAATCCGAGGTGTGATCCTCCTTTAAAGAGCTCCATAA  
CGCCATCTGTCTGGGAGGAAAAG  
ATGGAAAGTAGACTCAACAGATTGGGTAAACCGATCGAAATATATGTCTGCCAATTTCT  
TCATAAGTTTGGGGGCAGCGA  
CCTCGCTAGGGTTACTCAAAAGGTCAATATCCATATTCACATTAAGGCACGTAGGGCA  
TCATCAAAGGAGGGACCAGCA  
GTTACAATACCCGAACCTAAGGAGAAGCTTAGACTGTAACTAGCAGATTGATTATTATT  
ATTATTATTATTATTATTATT  
TAATTATTTGAAATACAAAAATTGATAGGTTGATATCAAATCTTCATATCAACGTTTGTTT  
TTTAACCTTTTCTTATAAA  
GCCAGTAACTCAAATGCTAATATCAATTCCTTTTATTTATTTTATTATTATTATTATT  
TTTTTATTGTTTGGGGT  
TCTTTAAATCTCCACAACCTATTATATATAAATAATATTAGAATTAATTTCAATTGTGCA  
CATTATTACGAATTGCAC  
CCAACAAAAGATCTTCCAATATTGCTTTTGCGATAGAAGGTTAGCATATACTCAGTGTAT  
TTAAGGTAGCAATTTAAATA  
ATCATATTATTTAATGATGATTTAGGTAATCAAATGTTTAAACGAAAATTTAAATGATA  
AAATTCATTTTATTCATG  
TATTATATACAATAACCAAACAAGAGAATGCTCTATATCACACGCATTATTTATTTGTACC  
AAACAGTAGAATCGTTATT  
CTTTCTCAAACATGATTCACCTTTTCTGCAATTCCATTCTCTATTACGATTTCAATTCTATG  
GCATTTTCTCGTACCAAAC  
GTGCCCTTAGTAGACTCAACCATTAACTAATTGACAAAATTTGACCGGACACGTAAG  
AAAACAAAAGAAATAACAAATT  
TAAAAATTAAGTAGAAAGTATTTTACCGTTAAAATAAAGTTTAGCAGGTGAAGAAAA  
ATAACAAAATTTGAATACCG  
AATTTCTAATATCGAAACGAATTCAAATGTTTTGCTAGCATTAATCTTATCTTTTTTTCCC  
TGTTATGGAACAATCTAGA  
AATTAATTGTATATTCAATACGCGGGGGACCAACATATCAAGTTGGCAACACCTCTTAA  
CTTTTTCTTGCCAAACGTCAC  
GTTTTCTTCCCTCCACATTATTACTATTAAAAATATCAAAGCTTCCTAGAAACCACAATA  
CGCGAATTATCTGCTGTACC  
CATCCTTCTGTCTCCCGATGGCTTTTACTTCATCTTCCAGGAAAATACCCTTTCTCACC  
CACCTTCCTATATTATATA  
CTTTGATCACTTCATTTCCAGTATCATACAACTCAAATACCCTACAAACGCAAATTATA  
ATACTAGCTAGCTAACATCA  
>CsCML55  
CATTTATATTTAAAAAATTAAATATATTATATCAATAAGTTTTCTTTAAAAACAGTTGTA  
ATGTTCTCTCATTGAGAGA  
AAATATATGCCCGTTTGTTCCTTAACCTTTTAAATGGGCAATATATGCACATTTCAAA

AAAAAATGAAAGGGCTAAAT  
GTTACCAAATCTTTTATAAATTTGCCCAAATTAGCCTTTTTTTTTTATTTTGAGCACAAATT  
GCCACCTCCAATATTTACG  
CACACAAGATGTTTGATGAAATTGTAAAACTATATTTTAATGCACCCACAATGCATATTT  
AGCTATTTTTTATTCAAGTAC  
GATTTAAACTATTGATCTTTTGTGTTTGTTAATTTTGTAaaaaaaAGTTGCACATTCTGGT  
TTCCTTAGGTTTTTAACCAT  
AGTTTTGACACATAAAAAATCTGAGTTTGAAAATTTGTTAAATATGAAAGTTATAGTTTT  
TTGTCCGTTCTTTACCTAGG  
TTTTTTAGTCGTAAAAAAATGCTTTGTATGACTGAGATATATCAACTTTAATATAACTAT  
ATTTAACTATGATGCACCA  
ATTTTCTTTGTGCATCACATTTAAGAACTTAGTGCATCATAGTTAAGAACTCATTGCATC  
ACAATAAATAATTTAGTGCA  
TAATGAAAGATATCCTTAAGTTGCATCCAAACCTCATGAGCGGTTGTCCTATCGTCAATC  
ATCATATCTACTAGTTTAGG  
AGAGATGGTGGAATACATCGACATAACCACAAGTGAGTCATTAGTGACATGGTGAGTAT  
CAATAGTAGAGGTGTTTGTTG  
ATGTTGATGTTGATGTTGATGTCGGTGGGGAGTCTAGATGATGATGCACATCACAAGTC  
TTGCAAAAACGTTTAAATAAC  
GCGCTACACGAATTGCAGTTCAACTTATCTTGATCAAGAGGTATGGGGATACACACCTT  
AATACTAGCAACGGAATATGT  
TTTATCAATCGGTTGTTGAGGGTTTGATGTAATATCGTCAGTCATGATGCAATAACCGAA  
TAGACAATAAAGAGCAAGCA  
ACAAAAAGCAAAAAATTGATGTGAAATAAATAAAGAACCGAGAGTTGGAGGGTGCAA  
CGTTCGGTTAGGATTAGGGATA  
TGTAACGAGAGAATCGTAAGACTCTGATAGAATATTAGAATTAATAATCCCCATAAAA  
AAACATATTATGCGTCATTGG  
AATGCATATATATACGGAATAAGGTCCTCTTAAAGTTCAATTTGAGCTTGATAGATCATG  
TTGAATTTTTTCGTGAAGAGT  
AGGGGCGGAGCCAAAAAATTTTGGTCAGGAGGGCACACTTTGATAAAATTTTGAGACT  
ACACTATAAATTAGTACTTGGG  
GAGGGGGGGGGGGGGGGGATTACGAAAAAAACCAAATATTTTGAAAATTTACACTATAA  
TTTTTTCGCTAGAGGGGGCACCT  
GCCCCTTGAGACCCTTTTAATATGGGACATTTATTTTACTTTAATTCAAAAAATTTCTCAC  
GAAAACCTCAACATCATCA  
TCAAATTCAAATGAATTTAAGAGGATTTTGATATTATAGACACAAGCACTCAGGTATC  
CGAATAAGGCTAGGAAACACA  
TGGGCGAAGGCCCGAAAACATACTAACCGACTAACGCTAATAAATACAAATAACAATT  
TTGTTTGGGAGAAATTGCATAT  
CCGTGATTTGGTACTCGGAACGTACTCAAACCGTCCAAAAAATGGATTTGTCCCATGC  
ACGAAGCATCCTATAACCTTC  
CAAAACGAAACCAACAACCTTCACACATACACCAACTATGCAACATCCAATCCCCACAC  
ACCTTCGACGTACCCGTTAGGC  
AATTGCTATCAAATAAACCCGTCATATGCATGCCTACTTTAGCTGTACCCAGTTGTCACT

TAACGACTACCTCTATATAT  
AAACCATCCAAACACATTATATGTATCAAACATCAAAACCCCATCTTCAATCTTCAACTT  
TTTTATTATATAAAAACATCA  
>CsCML56  
CTGAAAATGCCTTTTCTAGTTCATCCTTATAAGTCATAGTTGCCATCAACAATGTAGGTT  
CGTTGTCTTCTTCTACAATG  
TTTGTCTCTTCTTCTTTATTCTTCTCTGGACAATTTCTAGCAATATGTCCAAGGAAGAAT  
AAAGAAGAAGAGACAAACAT  
TG TAGAGGCTGTTGGTTTTAATGTTTTAAAGACTTCTGTAATTTGCTTCGTAAACATTAT  
TATGTACTGTAATGCATAGG  
ATAAAAGAACCGTATATTAGTTTGTTAGTATTTGGCAAAAGCCTGGAATTTTAATTGGGC  
TTGGGCCAAATGGGTCAAAA  
TGGTTTCTCTGTAAACCAAGGAACACGACAAGTATTTGGATGATTACTACGCGTCAAT  
TGATCCAAAGGAAACTTGCAT  
GAACATTAAAGGCTTGGAAGATCTCGAATGGAAGGATGGAATGATCCATGATTATTTGG  
ATGACGAATTCTTAAGCATGA  
ATGGAACTCTTTACATCATGAAGGTTGATTCAATTAAGAAATTTATTTCAATTTTAATCAT  
GATAGAAGATGACAATCTA  
GTATACAAAACTGGAATGTTTTAAGCAAACACTTTGAAGAGATGATAAAATGGTTTTA  
CCAAGTTTATCTTGGTCGAAT  
CATGGTGGATCCCTTGCCCCCGTCATCAACGGTATAAAGATCGATTTACTTGGTCTTTA  
TAAGATAATAGGTAGTCTAG  
GAGGCTATCTTGGGGTTACCTTTGGTAACCAATGGGGAGATGTTGCACTTATACACGGA  
TTGGAACGAGAACATGATGAG  
GAACTAAAACAATGTTACAAAAGAAACATTGACTTAGTACGGTGTTATTTGAGACTAC  
ATTACGAGCCCGAGGGAAGAT  
AGCCAAGAAAGAAGGTTATGGGAAGGCCCCAAAGAGTGAAGAAGGGTCGAATGGGC  
AGTGGTCACAAGATGGAAATGCAC  
AAGTTCTCAACACGTATAGCAACAAGGATACATGGATGGACAAGAAGGATTCACAAGA  
AAAGATGGGCGTTTGAAGTCTT  
TACACATTAAAGGGGACAATGTTGGTTTTAATGTTTTAAAGACTTCTGTAATTTGCTTTG  
TAAACATTATTATGTACTGT  
AATGCATAGGATAAAAGAACCGTATATTAGTTTGTTAGTATTTGGCAAAAGCCTGGAAT  
TTTAATTGGGCTTGGGCCAAA  
TGGGTCAAAATGGTTTCTCTGTAAACCATTGTGTCGGTTAGTTTATATTACGCCTCTTCT  
AGGTTTTGTGAAACGTTATA  
TCACTTATTTGGTACCGTTTCACTTCATATAAAAGGGAGGCAGTATAGTCGTTGTAATCA  
TCAATTCATACTTCAATAAT  
ATTACTTCGTTTATACAAAGTTTCTGTGTTATTTACTTTTCTGCAAACCTGCATACAAACC  
AAACATCCTTTACTGCTTTT  
TCTGTATCAACAAGAAACGACAACCTATGTCAAGTTTCAAACACAACCTCAGTGAGTACT  
TGCCAAGAGGAACACGTTTAC  
ATCAATAAATAAGTGAGCATGAACAAACACAAACGAAACCGAATTTTGTGTATATCTTG  
TGCTTGTTTGTTTGTTTCGTTT

AAAGTTTTAATGAAAACATAAACGAACACGAGCAAACCTATTTTCTTAATAAACAAAC  
ATGAATACAAATATCCATTTGG  
TTAAGCATTATATTACGACGTTTGTTCGATAGAACTTAAACAATCGAACAAACACCTAT  
CATGCTTCGATTTTTAGCGC  
GCTACTTCTTGATAACCGGAGCATGGAAGTTTGGTCTTCTCTGTCTCATATTTTATTTTC  
GATCTTAATTGACTCTCAA  
TTTCTTAAAGCTTTTTTGGTTTCGTGGCCTTCTATTAATCCAATCATTGAAAGACTAAAA  
TTACAGACAAAAATAAGTA  
ACCGAAAAGGCCCCAGTTAAAGCTTCGCTTTGGGCCTCCAAACGGCTTGAGCCGCTC  
ATGTACGCAGCTAAAAAGAAATA  
>CsCML57  
GACTTAATTAATTATATAATGAAAGTTGGTTGGTTAAATCTAGCATAAAGATGCTAAGGG  
AAGAAACCATTGCTCGAAAA  
AAGCTTATTTAGTAGTTTACTTTACCAATATTAGCTCATTGAGTTACGATCTTCAAATAC  
TACTATTAATTGTTGGAC  
TTGTAGCATCTTGCAATTGCTGAGAGCCAGGACACGGGTTCATCCACAACATCATCAAC  
AAGAATGATGCCACAAGATTCA  
AACGAGTATGTTGTTCTCTTTGAAGTAATTTACAATTAACATATAACATATGGGATCGTAT  
TATATCTTGTGCTAACCT  
GTTAATTGCTTCTTCCAACAGTGGCTTCCAGGTACAGAAGCTTTGAGAGTGCAGATG  
GAAGTCCAACGAAGATTGCATG  
AGCAGCTAGAGGTTTCGTTTCATTGACATTGCATGTTTCTTGCAGCTTATTATTATTTTTCA  
TAGTTTTTAATAAGGTGGT  
GACTTTGACGTATTCACCTATGAATGGGTATAATTGGGCTGAACGGGTCAAGGCAGGTT  
GAAAGTGGCCGAAATTCTATA  
TTTAAATTCAGTTAACTACTAAATCGCTTTATTAAAAAATATAGATTCTTGGTGTGTAAT  
ATAATTTTTGTAATAATAT  
TCAACGCACAAATTGCTTATATAAATTGATAAGAGAATGTTTCGGGTCAACCCGATCAG  
TACAAATTTATCTGTTTTGAC  
TCCATACCTTCTTTTTCTGATTAACATTTTTGTAGTTTATTGACTGGTATGCTAAATGA  
CACAATTACCCATTCACAG  
GAGGGGTATATTTGTAAATATGATAGCTCCCTTTTTTCACTCTACATCTTAAGTCACACG  
AACAATGAATAAAGCACAGC  
ACTTTCTTATTATTCCTTTTTTCAATCTTGAAAACAAGATAATCATTACATCCGTTGAAA  
AGAATACCATTTTCTTTTTT  
GTGCTGTAAAGTTTACATGTTTGATCAAAATTCTGTCTTTAAACCTACCAACTATTTTC  
AGGTTCAACGTCGGCTCCAG  
CTTCGAATAGAAGCACAAAGGAAAGTACCTTCAATCAATCTTGAAAAAGCATGCAAAG  
CTCTAAACGATCAAGCAGTTGC  
AACCCTGGTCTAGATGCAGCTAGAGAGGAGCTTTCGGAACTCGCAATCAAGGTAGCA  
AATGACTGTCCTCCATCTGTTA  
TCCAATCCCGTCACTTCCTGATGTCGCAGCTTATCTTGAAAACGGAATCGCACCCAGC  
ATTGACAGCTGCTTGACATCA  
AACAGCAACCTGTTTTACCCATGGGCATGAAGAAAAGACACCGGGCTATGTTTCAGCA

ACGGTGGAGACTCATTGCCACA  
AGCAGAATGGATGATGTCCGGATAGTTTGATGCATCTTTCTATCTCAGAAATGTATTCTT  
CTTTGAATTCGTTTTGTGGG  
TCTGGTTTTGTCTATTGAATCGATAGTTCTTAACCATCTGTAACCTTGCAAATACTATCT  
TTAATCAATTCAAGATGTT  
TTACTTTTCATAGTCTATTTCAATTTGCTCTTACAGGTGTAATAAATGAAATGGGTACATAC  
CATTTTGCTTTTTTAATTAT  
TTTCTTTGGTTAAATGATGGAAATCCGGAGGTCTTCTAGGAAGCAGTCTCCTAACCCTC  
GGGTTTACCTAAGGGTAAGGG  
TATGATCTGTCTCCATTATACCTCACCTATACCCTACTCATGCGGGATTGGATATCGTTGT  
TGTGGTTAAATGATGGAAT  
GTTATTGGTGGGGGCCATTGTTACATCTGCCCATCATTGACCCATCCACCTTCAAGATTA  
TGAGCATAATAAGTGGAACA  
ATTTTAAATTCTAAAGTCACAAGAACTCAAGTACTACCATTGTCATTTCACTTTTTGAA  
AACCAAATTCCATAAACTT  
TTCTATTTAAGTTTGCAATTTTTTACCATAATACTAAAATTTATCAATTCTTATCTCATCTT  
GAAATCATAAAAGCTTCA  
>CsCML58  
GCCGACATATGTTGGCCTAGCCCTTCAATGGGGATAACCGTCAAGAAATCTTGAGCATG  
AGGAGCTCGGAGACATTCAA  
CACCGCTTTAAAGTTTAAACACAAACATACATCATAATACACACACAAAAGTAAAATAA  
GAAAAAAGTCAGTCATTTAG  
ATTACCGACTTATTTTTTTTTTTTTTTTTTTTGGAAAGGCAAAAGCAAATATATTAAACT  
CAAACCACAGATACAAATA  
CATAGAAAATGCAAACCCCTTTCTATAAGATATAGATACCAGGGCGTGAGACAAACCAC  
CAAATCAATGAGCAGTCTCA  
CGAGCATGCAAACACACCCCAAAGAGAATCACGAGGGCTAACTAAATTATGACCGAA  
CCCAAGAGAGAAACAACAAACA  
AAATACATAAACATAACAGTTCCAGCAGCCAATTAATCACGATCGGTTTAGATTACCGA  
CTTATGCTCAAAGCTGGTCCA  
AGACACGTGGGTGAGCGAGTATTTTGTTTAGCTATAATCCACTTCCTTGTACTIONTACCA  
TAAAAATATGTTACTATATA  
TAAACAACCTCTAAAAATATATAGTTAGCTTATGTTTGATAGAACTAGCAGTAGTTCTAT  
CAAGAAGAAGAAGGAAATCA  
CAATAGCTGTTTATTTTATAAAATTATTTATTAGCGTAGATATGTCAGTGATTATAAAATAT  
AAAATAACCTAACATTGT  
GTTTTAGAGTTTCAGTTTCGGAAAGAAAAAAATGAAAAAGAACTAAATAAATTTGT  
GTTCTCGAGTTAATTTTTATGA  
AAAGAAAAGAAATGGAAGAAAAATTTGGATTAAACTTTTCATTTAAAAAATGTGAAA  
AATGAGAGAAATTAAAGTTAT  
ACAGTTAAGAAAACAAATTAGTTATACTTTTTGAATTTTAACTCTTTTAAATATGGGTAT  
AATTGTAAATGGATCAATTT  
TTTTTTATTTTTTTTTTATTATTATTTTTTTTAACTGAAAAACACAAAACTTAGGGTG  
CGTTTGGTTGCCCACTATG

AGAATGAGAGTATCACTATGAAAGTGATTAAAGGTGTTTGTTTAAGATGAGAGGGTCC  
ACCACTATGATAATGAATGATG  
AATATATTCATACTCAATATACATCAACGAAGATAGGTATGGATATTTTCATAGATGAGGG  
ACCCACCACTACTATCAAA  
CTCATACTCATTGTCATTCATGACAGTATACCAAACGCACCCTTATTATTATTATTATTC  
ATTTAAGAATGCAAAACTT  
TAATTAATTTTTGATTTTTTTTTCTCTCTTTAAAACTCAAAGCACGATAAAAGTTAAACA  
TTAAACATTAAAAAAAATGA  
TGCATATATTTACAATGTAGACAACCTACATTTCTTTTAAAAAAAACAAAAAATGC  
ATGAAAGATTTACTGCAATAA  
CTAAACTGTAATTTAAAATAAATAATTAAAAAAAACAAAAAGAAAAAAAATTG  
CCTATCATTTTCTATCATTTTT  
CCTAAAATTTAATGGTAACCACCATAGTTGTTAAGATCCCGATCCTGATTTTAGGATTTT  
ACGATTTTACGATTCTACAA  
TGCGAAAACGATCCGGATCCTATGTAGGATCTTAACATGCTTAAGATCTTATAGGATCCC  
GATCTTGCCCATGAGATCTT  
AAAATCTAATACGATCCGATCTTACTTTTTCTTAAATCGCAAATTAaaaaactacaaagt  
TATGCATTATCCTTTAATAT  
AATTTGAAAAATAACACGTGATTCTTTTAAATCATTTTCATATTCATAATTTGAGTTTGGTT  
GGATAAAGTTTCTGAAACA  
CCCCCTTCATTAAATACATCATTACCATAAACAGAACTAGAAGCAGAAGAAGCTATC  
CTCCCAGAACCATCCAATTCC  
AAAACCGAGTTTCATCACGCGTAAATTCATCCCTATAAAATCAATCACCCCTCAATCAC  
AATCTCAATTATCACAAAATC  
>CsCML59  
ATTTTATCTGCCTAGCCTCAATTGGCCCATATAATACTAAATGGGTCGAAATTGTCATCT  
CTTGTTCTTGTTGTTTTGAC  
TTTGTGTTGTGTGCTGATTTGCAGGATGGTCGTATAGATTACAACGAGTTTGTAGCAATG  
ATGCATAATGGAAATACTAC  
TTTGACAAAGAAAGAAGTGAAGGATAATTTTAGCGTAACCTTGACAGAAGCAGTGCC  
AGTTTTTTAATATAACTTTTTTG  
ATTGTTTTTTGCATCTAAATGTCAAAAAGATTCATCTAAAACTCTAAACTAACAGATGTT  
AATACTCAAATAGTTCATAA  
GGTGTTGCATTTTGACTTGTAGATTGTACCTTATCTTTATACACACACATGTGAAATGAA  
AAGATAAAAGAGTGTATTTT  
GTACATGGACAAAGAGAACAATTTGAATTTGTGATTGTTCGGTCCTAATATACCGTTAGG  
TCTGGTTCTTGGCATGTATGT  
ATAATTGCATAGAGTACAGCTCGTGTGGCGGGTCTATATGGCTGTTTGATGATTTTGGTC  
AACGTCTTGCACTCGAGATA  
AAATTATCTATGCGCAAAGAACGACGTTCAATGGGACAAAGTTAAAGGTTAGGATCTG  
TGGCTTATACTGCCATTGCGAG  
TCTGGTGAAATATATACTGCCATTGCGAGTCTGGTGAAATAGCGAACCTGATGTAATATG  
TGCCGGACTTGGAACCTTCTA  
TTTATGCATGGAGTAAACCTATTTGCTTAGACTCGTAGCCCATTTTCATTTGTCCAATTA

ACAAAACCTTAATAATGACTT  
ACGGTATATCTATGCTATGCTAAGAAAAAGTTGGTATAACTTCTTTTAGCAAAAATATTT  
TAGAGCAACAAATAGGTTCTG  
AACCTAGGACCTTTAGTTCAAGGATTCAAGGCTATAACGAACCCATCTATGGTCTAAAA  
TATACTAACCTTTTACAAAAT  
ATATTACTTATCTGCTTTTAAATAGAGTTGACCATGTTATTGTCTCTTTGTCTACTTATTTG  
AGACGAGAGCAATGAATT  
TTATTTAACACAAAAACGTCACCTTATGGTGTGGAAGTATGTTTTCGTGAGGTAGTGAGA  
TTTCTCCAATATCTTTTGGTC  
TTGTTAAGTTGAGCCTTTTGGATATTTGCGTGGATGTAACAAACGCGTTAGCCTCACCT  
TGGTTGTGACCCAGGACCAA  
GCTTCGGGGTGAGAGTAAGTAAAGGTTTCACCGAGTGGTGTGTGTAATAAGTGTGTGT  
GAGTATATTGAAATTGCTACCT  
TTTACAAGTTATTGTATGTGTATTTATAGTGTAAGCTAATCATACCTAGTCGCTGTCTTGA  
TCGCTATATCTGACACTGT  
CGCTACCGTTGCTTCTGACACTGTCCCTGACTAGCGTCTGACACTGCTTCTTACACCCA  
GGAGATAATAAGACGAACTAT  
TTCCAGGCTAAATGCCAAATGTGGTGTGAGGTCAACGATCCTTTTCGGTTCTTGGACCTT  
TCGGTTCTTTAGCCCCCTTCGG  
TCCTTGGGTTTTCCGGTTATTGGATCGTTGACCATATACGTCGTCATGTCCCCACAGTA  
TCATATTATTTGTCTAAGAC  
TAATGATGTGATACTTATTTAGTCGTTACTTTTTTCTGTGTCTTTCGAGTGCTCGTTGTT  
TCGTTTCGTCCTTATTGGGCC  
ACGCGATGGTTAATAGGCCCAAGCCCATTGGGTAAATAGGTAAAACCTAAATTACCG  
AGGTTTCGTGGGATCGTGCCAC  
GTGGCGTCACGTGCTCTTCACAACGGTTCAGATAGGGCGTGTGGATTCTGACACGATG  
CGACGTTTGAGTACCTCCCAAT  
TGCCTATATAAGTCGTTTTTATTTCTTTTTACTATTTTTACTTTTTACTCCCATATTCCTTG  
TCTGTCGCTACCAGGTC  
TTCCGGCCTGCTACTCAGGTGCGTTTATCTTTCTCCTGTTTGTTCGTCATTCGTGTTACC  
TTCCCCTCAGTTTCCATTG

>CsCML60

CAATTTTATAATATATGTCTACATTCTAACCATTGTTTTGTAGATTTTCAAAATTCACTTT  
GAGTACTTGAAGCTCTCAA  
TAAGGGGGAGCTTTTCGTCAAAGCAAAAGCATTGCAAAACTTTCTTCTTGGCCTTCTCA  
AAATACTTGACGCCCTCACCAA  
GGGGGAGCAAAATATGCACTACTTTACCCTTCTTATTTCTTCTCATCTCTTTATAATCTA  
TTTCTAATCTCTTTCTTCT  
CTTTCTTATTTGAGTTAGTTTCTTTGCGACGCTCTTTTTGTTTCGACAAAAAGGGGGAG  
AAAAGAGTAAAAAAAACCTT  
AAATTCAAAATTTATGAATTCTAATTTTTACTTAAAATAATGTTATGTTTTGTCATCAACA  
AAAAGGGGGAGATTGTAA  
TACAAATAAACCGTAAAAATGTTTATTTATATTTTACGATCTTCTTATGTTTCGTCGATAA  
CAACAATAAAATTATTTTA

ACGAGATAAATAAAATACGTAAGTTTTTGAGCCAATAGTTTACTAACTCATTTCCTAA  
CAAATAAAATCATGTTTAGT  
TAATAGTTTATATAAAACCAAACCATTTTTATGAAACACATATAAGTAATTTCTTACT  
TACATTTTCATAAAATACA  
TACTTTAGAACTAACTAGTTAAATGTAATATGTTAGTAAATAGAGTTGGACTATCCATAA  
CCCAAACTCATAACCCATA  
ACCCATGACCCATGCTCATTACATCATGCATGACATCACAATGGGTAAAAACCATGACC  
CGTGATTCAAATTCCATGACC  
CAAAGTCCATAACCCATGATCCAAGATTTCCATTGCATCATGAATAACATCACATGACCC  
ATAACCCAAAACCCGAAATT  
GTAACCCAAAATCCGGACTGGACTGACCCAGGTGTCGCATCCCTTGGATTGCACTGGC  
CGGATCCCTCTGGGAATGGATC  
TGGCGAATTCGGTTGATCAGACAATTATTTTCGTTATAAACAGTGAGTCATTTTCGTGAATT  
ATTCTTACCCTTTTTAGATA  
TATATTCTTACCTCACTAACATAAGATCTTTGGATCATCCATGTAGCTTTTCTCTTAGTGA  
TTCTCTAGGTTTCTCTTAA  
AGGCGAGATCACAACGATTAGCATAGAAGACTTGCAAGCTCGAAAATATGGGTACTA  
GACTTCACCATCATAAGATCAC  
ATAAGTGTCTCTTGTGCTTGATTCCTCTCAAGTATGTCATAGGGGTGTTATGTTAACTAG  
TGGTGCTTGGATTAGTTCCT  
CCATTGTAAAGGAACTCGGTATCTAGCCTTGTACCAGATAAAGTGTAGGTGACGTAGGT  
TTGGTTATACCTTGTGAAAGA  
ACCCGATATCTAGCCTTGTACCTGATAAAGTGTAGGCGGCGTAGGTTTGGTTATACCTTG  
TGGAAGAACCCCGTATTTTA  
CCGGATAAATTGTAAGGGACGTTATGAAGGCTTCTCCGCCAAGATAAGGAGCTTGTGG  
TGTAAGTGTTTACGAAATCTCGA  
GTTGGACACTCAGGGAGTGGAGTAGGGCAAGGAAGGTGACCTAGTAACCGAATCACT  
ATAAATACTTGTGTCTCACGGTT  
TTATCTTTCTATACCTTACTTCATACTCAATATTCTCATATATTTAACTATCAATATCCATAC  
TTCAAAATGAATTGACA  
TAAATAAATCTAAATGTGTAAACGGACTTTTAATCGTTAAACTATTCAACCCTTCCT  
CCCTTTAGTTTCTACACCC  
TGGTCAGAAACTATTCAAACGGCACCTCATGTGTGCATTATATAAATGGGTCTTTTATGTT  
GGGATGAAAGAAGTAAAATT  
TAAACAGGATATATATGAAATGTGTATGTATTTAAAGGGATGTATATGCAAATATTGGACC  
TAAATTCCTCAAAGATAAA  
AGCAGATGATTCTTTCTTCCATTCTGACAACGCGCTTTGTTAACCCAAAAAGAAAAG  
AAAAACCCTAATCAAAAAAGA  
>CsCaM3  
GTGTCTGGAACATGGATACAGGTGCGAGCTCACATCTGAATGCATCTGTAAATAGTCTT  
AGTAACATTATTAATACTTGC  
ATGTATCCATCTGTCTCGGTTGGTGACGGGCATAACATTCCGGTCACCAATACGGGTCG  
TAGCATTTTGCCTACTCCTTC  
TCGACCCCTTTACTTAAATAACGTTCTTATTACCCCTCATATTGTCAAAAATCTCATATAT



GTCCGTCAATTTGTCTGTG  
ACAATAATTGCACTGTTGAATTTGATCCTTTTGGTTTTTCCGTCAAGGATTTTCATGACAC  
GTCGGGTGCTCCTCCGATGT  
GACAGCACGGGCGACCTTTACCCTGTCACAGCCCCATGTCCTATTCCCCAAGCTCTTCT  
TGTAAGTCAACATACGTGGCA  
TCAGCGCCTTGGACATCCAGGGAGCAAAGTGCTACGTCATCTCGTCTCAAATAATTTTA  
TATCTTGTAATACAGAGAAGC  
CGCCTGTGCTTTGTCATGCCTGCCAGCTTGGCAAACACGTTTCGACTTCCATTTGATAGT  
TCTGATACTATTGTTAATGCA  
TGTTTTGATGTTATTCATTCTGATGTTTGGACTTCACCAATTTTCGAGCCTCTCGGGTTTT  
AAATATTATGTTTTGTTTTT  
GGATCACTATTCTCATTTTGTGTTGGGTCTACCCGTTGATGAACAAATATGATGTATTATCA  
AAATTTGTTCTATTTTCGCA  
AATACGTTCACTCAATTTAAGAGTGAAATCAAATCGTTTCAGTGTGACCATGGCGGT  
GAATTTGATAACCGCACCTA  
CATAAACTTTTTGCCGACAATGGCATTCAAGTTTCGTTTCTCATGCCCCAAGACATCTCA  
ACAAAATGGGAAGTCAGAACG  
GATGATTGCGACAATCAACAACCTCATTGCAACCCTACTTTTCCAGGCCAACCTTCCAC  
CAACCTTTTGGGTTGAAGCTT  
TAAACATGGCTGTCCATTTAATCAACTTCTTACCTTCTACAGCTATTGCCAACGAAATCC  
CATATACCCGACTGTTTGGC  
CAAAACCCGGATTATAGCCTTATACGCACATTTGGTTGCTTATGTTACCCCCACTTATATC  
CTAATCACAACTTGAACC  
ACGCGCCCAACAGTCCAAAGATCTCTGAGTAAAGATGAAGTTCAATATTGCTAATCCA  
ACCACTGGGTGCCAAAAGAAGC  
TTGAGATTGACGATGATCAGAACTTCGGGCTTTCTATGACAAGAGGATCTCGCAGGA  
AGTCAGTAGAGATGCCTTGGGA  
GAGGAATTGCAAGATTATGTCAAATATGATTGCTTGAGAGATACAAATTACAATGATAC  
AGATATATAGATGTGCATAGA  
ATCATCTAGAAAACGGGCTAGAGCCCATTACAACCTGCTTACTTATTTGAATATTCTGAC  
CCGGGTACTGAACCGAATAA  
CATGTTGACCCCCCTGGCTGAACCGGGTAGTCATGCTGACCCGTTAAGTTGCACTGTTG  
AACCATAGGACCAAGTGACCC  
CCCTTGCTGAGTCGAGTAGCCAATTGGACCTGTCAAACCTCCTTGTTGAACATGGTAA  
GAATGCGGCAGTCCAAAAAGAC  
CAGGTGAACCCCTGGAGATACAAACATACTGTGTGCCTAATATTAATTGATTGAATCC  
CAAAATCACAAATTATTGATTC  
AATTATTCAATCCTATTCTTCATCTTCTTAAACACAATCCACAAAACTCAA  
ATCACACTCTTCACATAACT  
TCACATTCAACCTTCACAAAACCTTATAAAATTTTAAATTCTTCACAGAATAACTTTATA  
AAATTTAATTTTATATAAAA  
CCAAAATGAATTTCTTCAAATCAACCTTATTCGACGAAGACCCTCCTCAACCAGAAAC  
CACAAACGCACCTTCCTCCCCT  
CCACGCGCCGGCGCGTACACCGATGATCAGATCTCTGAATTCAAAGAAGCTTTTAGCC

TATTAAGGAACTCGGAACAGTT

>CsCML61

AAGCTCAAAACCTGTTTCCAACCACAACTGGATATGATATCACATTAGCATCCCAAACA  
CTGTTACCTTTTATAACAAAA  
ACTTAAAAATTTCTGTGATCATTGCTAAACATATAATAGGTTGGTTAGCTTATGATAGTG  
AAGTACTCCTATTGCATATT  
GTAGTGCATCATGACCCTATCAGAAAGTTGTTATAAGAAAACAGCATGGTCATTGAAATA  
TGGTTATTATTAGCATTGTCT  
TTGTTCTAGATTTATCCACATCGGTACATGTTTATAGTAAAACTAACTTTATAACTGAA  
ATACGATTTTAACTAGAAAA  
TGAGTATCGATGGATGTGTTTATAATAAACTCGTCTATAAATGCTTTGTTTTTTAACTTG  
CTAATTCGAGTTTATAAT  
AAACTCATGATGCATCACTATTTTAATTTGATGATTTTTTTGTTTTGTTACAGGTACTTCG  
ACCACCATCGTGTGTTGGCT  
AATAATTGATCGAAAAATCAATTTTATACCTTTTTTACTTTGATACTTTTAGTACTCAGCA  
AGTATTCGAAACGTTGTG  
TTCAATTAACTTTGGATGAAAAATTAGTTCGGGCATAAACTCTTAACATCAAAAAGG  
TATATCTTAAGGCATCGACTA  
TAATAATTTACGAAAAGATTTTGAAAAAGATACGTAAAGGTATAAAAAAATTTAACTA  
TAATGAGCATTTATTTATTGC  
TTGTATATATTCACCTCACGCTTGTGTGACATTGAATAGATCTAGTATATTAAATCTCTTA  
ATACTTATTGCATTTGAAT  
TATGGGTGATGTTTTTTTTTTTTTTTTTTTTTTTATAAAAAGGGTTAATTCACCCCGG  
TAAAATAAATTATGGGTGA  
TGTTTATAAAGCTTTAAAAGGTTTATACATAATTAAGATAGATTCATAGAACATGAAGTT  
TATAAATTGATAATATGATA  
TAACTATAAATCTTTAAAAGGTTTACCAATCACCAGGGCCGTCTTTGATGGCGTGCAA  
GCTGAGCGACCGCTCAGGGCC  
CAGAATTTTTTGGGCCCTAAAGTTTGTCCCATTAATAATTATATGCATGTGTAGACATATT  
TTTCAAGAAGAAAAA  
TATTTAGACGGGAAAATATCCTATATGAGTAATATGATATAACGTTTAGATAACCGATTGC  
ATTATATCTTATAAACGGT  
GATACTTTACATATAATATTGTTTAAACGAAAGGCCTCTTTATATAATTCGTACAGGGTCC  
TCAAAAATTCGCCGATTC  
ATGAGATGGCCCTGCCAATTACCACACTGGATAACCTTAGAGGCGGAAAGCTTAAGGG  
AATTGATACTTACACCACATCT  
TTTGATGCATGCACCACAATTTGTGCATTACTGTACCGTACAATACTGTAATGCCCAAAT  
TATGGTGCATGCATCAAAAAG  
ATGTTGTGTGAGTAACCTCCAAAGCTTAACTCACGACACACCGATAAAGAGTCCACTA  
AGACTCCACGTCCATTACCTTG  
TATCTGTAGTATTGCATACCTTGATTTTATCTACTTATTTTTATCATAAGTAGATTAATTTA  
TCTTCTAAACTAAAACA  
TGAATATAATCTTCTAAGTTCTAACACATTCTTTTAGTCATAAGACACGCTTTTAGAAAT  
ACAGGTAGCAAAAAGAAAGGG

AAAAAAAAAAACATGAATAAACGAGAGTTGTAAGTGTGACAATCAAACTTACGTGA  
CCAATTTATTATATGTAACGAAC  
TTTCCTAGCAGTTTCATTATTCGCTATCAATTCCATGAAGAACTGCTTGTAAGCTTCAT  
AATCAGTTCCACCACGTTAC  
ATTTCAAACCAAACCAAATAAATTCAGTATTAGTGCCAAACCACGCGTAAAATCCATA  
CCTATATAAGTACTTAAACAT  
CAATCCATAATGTTATCATACATATAGTTCATAACTCAGCTCATAATATAACCATCAAGCA  
CTCAAGAAATTTTAAAAGC  
>CsCML62  
TCATTTTTATTGAAAAATCAATTGGGCAAATAGGAGAACTCAATTCGCCACGTAAGCA  
AAATTGTGTGATGTGATTGGT  
TAATAAAAGTCAAAATTAAATTGATTTTGGTCAAACCTTTAATAAATTTGGTGGAGAAAT  
TTGGTTGATAAAAAAACACA  
TAAAAATATAGGTGTCAAATTTGTGAAAATAAAAACTTAAAAAAGAGAAGGTAATTA  
ATAAACTTTAGTGGTTGAATT  
TCTAAAAATTATATAAAGTTAAGTTTAATATTATAAGCCTCCATATTTTTTAATAATTTTGG  
ATTATAAACAAATACCCC  
CTTATACTTTATACCCCTTATACTTTATATCTTAAAAAATACAATGTGTATGTTGTTTTAAA  
ATAACAACATATAAATTT  
GCATAAAATTTATAAACAAATAACTTTGGATTATAAAAAAATAACAACATATAAATTTGC  
ATAAAATTATAAGTATCAAT  
TTTAACTATATACGTTCAATAAGGACTTATTTATTTTATTTTTTAAAAGTTAATCTATGTG  
GACATGAGTTTACATTTT  
AAATATGACTAAATTACTGAAAAAGGGAATATCATTATCAAATTGTAAGCACTGGTTACT  
TTAATATAAAAAATAAATATG  
CGCAATTGTACTTATAACAATAATTCATGTAATCTTATTTATTTATATAAGGATATATAGA  
AAAACATTTTAAAAAAAC  
TTTAAGGAGTATACTTTAACTTTATCAACGCTCATTATGTGATATTAAACGTGCATCATGT  
GTACAACATAATATCAGTA  
GTGAAATTTAAATAACAACATCAACATCTTTGTCAGCTAAATAAAATTAAATCTTGAGTT  
ACCTAACATAAATTTTACA  
AATATTTTTTTCAAATTCTAATGGATATTAATGCATAATGAAAACTCGTGCATAAGTATT  
AGTTGTACTTATATCATAA  
TTTTCATGGGCAAATCTTATATGTGTATATACTGAACTAAAATGTTAAAATAAATTTGAT  
TTATATGTAAACTCTGTGA  
GTGCACGAACTTATAATTATATAATTATATGCATTACCTTTAAATTCACAATATTCTGTAT  
TAATACAGAATAATTTTT  
TTTGTCAAAATCCCGTGCGTGACGGATATTATACTAGTTTATGAAAATGGTTATTGGT  
ACATCCTTCTAAAATGATTG  
TAATACTTCCCTTCCCTTAACTTTTTTTTTTTTTTTTGCTTTTATTATAAACTACGAAA  
CGGAAATAACGAAACAGAA  
AATATAAAGTTTGACAAGTCAAAAGTAGTAAAATACAAAACATACGGAGCAGAAAATC  
ATAAAAAAATGTCTTGTCTTG  
TTAAAAAGTGGGTAAAAGTAAAAAAAATGTAAAATGTATAAATATAAAGTTTGACAAAT

CAAAAGCAGTAAAAGACAAA  
AACATAAACAAAAATCATAAAAAAGATAAAATGAGTAA  
AGTAATTCACGAGCTAAAGTAAA  
AATCATAAACGGTTATGTTTATAGTGATTTTATTATACTTCGTAAACCAATTCACGAGCT  
AAAGTAATGTGTGCATGCT  
TTTGTGTTTAGGTTTCACTCAACTTCATGGAAAATTCAGAGTGTTTATGGTGATGTCGC  
CCAAGTCAACCAGTCAACGC  
TGTGTTAACTCACCATCCTAATTAACAACCTTTTAACAAGTCTTAAGACTACCAATTT  
CAAGATTCTAAATGTCGTTG  
TCAGCATTTTCCTGCAATCTTTCTAAGAAATGTTCTTGTAAGTGGACAAAATACAATG  
CTATAGCACATTCTTAGACAA  
TATATAAACCTTACATCCCATGCCATCAAACATCCAACATTTGCACCCCATCCGTGTTTT  
GTACAATAAACGTAGGAAAC  
TCATTTGATCAAGAATGGTGACACCATTGATAAAATTTTCATCTTCCATCCTTTTACACT  
TCGAAATTGCTTTTTGTAAA  
>CsCML63  
TTGTGACGGGTCAGAACTCAAACTCGTGTTTTCAAGAGACGGCGTCTAGTTGTGAAA  
GAGTAGGCCGTCGCTACTCAGA  
CGGCCTAGATGCGATCCAGACGACGTCAGAAGCTGAAGAGGACGGCGTCACGGACAT  
AAGGTGACGCCGTCGCAAGGTTA  
ACGTGGCCAAGACGAAACCCTAATGGCGGCGACACGACGGCGTCACTAAACATAAGG  
TGACGCCGTCGCAATTGTAATCT  
TATATATAGAATCCGAATTTTTCAGTCTTTGTGTGGAGAGTCTTTGGAGTAAAAACCTA  
AAACCGAACCTAAGGTGTCT  
TGTACAGTATTTTAGGGTTTTTAACCCTATCTTACACCAAGATAAGTCTTTGCTTCATTA  
ATTCAATTATGTCTTTGATT  
ATTTGTGTGTATGCTTGCATGTTCTCCATGTCCGGCTAATTTATTTGTGTGTTTGCTTAGG  
AAGTATGAACTTAATTAT  
TGAATATTGATTGGTTGTTTCTTATCTTAGTTGATTAATGATCTAGTAATGCGATAGGTCA  
TTCGTTGTGTACTTAATGC  
TTGATTCATCTTTGTGAACCTTAGAGTATGATTACCTGAGTGATTGTAGGCTAAACCATC  
CGAAGAGCGCCTTAGAGTAG  
GAGTCTATAATCTCTAAGTGGATTTGTAGACAAGACCCTTTGGTAAGTTCAAAGAGTTA  
GGGAGAAACGCATACCCTACA  
ACTTTAGAAACACAACGCAACTAGGAATAAGACGTGACACTCAACCATCAATAGGAGA  
TAATTAAGGAGTAATACAACT  
AAGTAAACACATCTTTAACTATCATACAAGCACACATTAATTAGACATAGACTCCCAC  
AACCTTAGTTTAGATAATTAG  
ATAATAGTAGAGTAACCTGTAGAAATACCAACCCCCCAAATCCAATACCCGAGATTCGT  
ACCTTTCCATTTTCATAAAAT  
ATAAAAAGATAAAAAATAATCTTCCTCAACCTTAACCTTAGCGTAGTAACTCCCTACT  
AGCATTCCCTATTCCCCTAGAG  
AACGATATCAATACCCGTGGCTTACCCTAATTACTACACTACAACGATTAGGTTCACTGC  
CTAGGGTGTTATAAACTTG

CTCGAAGAAAAGGAAGTTTCCTTGACCCCGAACGACGCGTGTAGCGTTATCAACGTGC  
AAAAACGGACAAAAAGGTGCAA  
AAATTGACGAAAACGTGCCAAACAGACGAAAACCTTGCAAAACAGACGAAAACGTGA  
AAAAATAGACGAAATGTGCAAAAA  
CGGACGAAAACGTGCAAAAACAAACAAAAACGTGTAAACATGGACGAAAACAGTAA  
AACCGGTTTTTATACGTGCAAAAA  
CATGTAAAACCGCATGAAAACATGCAAAAAAAGACGAAAACGTGCAAAAAACAGAA  
GAAAACGTGCAAAAAACAGATGAGA  
ATGTGTAAAAACGGATGAAAACGTGCAAAAAACGGACTAAAACCTTGTGAAAACAGACG  
AAAACGTTCAAAAAACGTGTAAAA  
ACGGTTTTTTATTCGTGCAAAAAACGGACGAAAACGTGTAAAAACCAACGAAAACATGT  
AAAAAGCGACAAAAACGTAAGAA  
ACTCAAAATTTAAGTTATTTGCTAACGGCCGTTAGTATAAAGGACTAACAAATGCAAGTT  
TATTTTAGTCATATGGGTAAA  
GTCAGATCAAAATTTGAAAGTACGTTGGTGAAGTAAAGTAATAAAAAAGTAAATATTTTC  
AACTCGGCAAAATTAAAGAAAG  
TAGGTTGCTATTTTATGACATTTACCTTAAAGTTTATAGTGATCCCACTTTTATTAAAGTG  
TTTGATTTTTTATTACCTAA  
CAATAATTATTGGGATATATCCTTCATGTATACAAATACAAATTCGGTATCATATCGAACG  
TATCAGTATAACCTATATA  
ATCAGTTAAAAATTTCTCCCATATGTACGGATGTTAAACCACACGCACAATCAATATTCAC  
AAACACACGAAACATCGAAC  
>CsCML64  
AAAGTCAAACCTTTCCCTGAATCACTAACTACCAGGCTCAGTGTCATCACTTACTAGAAG  
AAAGTAGCCTTGTCCTTACT  
CTAAATAGCTAATATAAACAGAGACAAAATACATCAGTATTTTGTCTTCTGTAAACCTGTC  
AGTTTGTCTCTAGGATAGA  
GTAAAAAAACCATACTTGTATAAATAGCATAAGAGTTGGAGTGGAATATTTTAAAGCTTG  
TGCATTAATTGTAAACACA  
CACACAAGCCATCTTTCACTCCTCCAAATACAACCTCTTTCCCTGAGATAGCTCAGTGGT  
ACCTTTGTAGTTGTGCTCAGA  
CTTAGCCTGAGCTTAGTGAGGAGTCAAACCATACTTGTGCTTTCAATCCCAAGTACTAT  
TCCGCAAGTACTTGGGTAATG  
TATTCTTTCTGATTCATTTCTAATAAAGAATATAAACGTTGAAAATTAATCAGTGTGTTTT  
TACTTGCAATTATTTAGTC  
ATTATCCCAATTAGTTATTATAAATCATTTTATATGATTGTGAAACGGGAACAACAGAG  
ATAAAGATAGCCACTCTGTC  
TCAAACCCCGCCACATTGTCAATTCTATTTACAGTCCTAGTGTTTGGTAGTGACCAGTAC  
GATTAGCCTCACAATTTTTGT  
CCTTTTCTCATAAGTTTGTGCTGATCTTGTCACTAACAATAGTTACAAATGTCTATGAAA  
GAACACCCTTTTCATGTTTT  
TGGTTCGCCAACCCCAAACCTCAGCGCAGCAATTATTTAAGTTCATCATGTACTTTGGAT  
GCAAGAGGCCGGGTATCTGT  
TATTTCTGTTTTTGTCTCTCCTTCATCTTGTGCATTAGAATTGGTATGCATGTCACCATCT

TGTAAAGGACAATTTAGAT  
AACTTGAATGAAGAACAACCTAAACAGAAACAAAATTGATAATCATATTGTTTATTGAAT  
ACTAAGGGTGTGTTTGTTC  
TTAAGACGTTTTGGGTCTGAATCTGACTACCACATCTTACTAGTAAGAGATGGCTAGAA  
AGTCTAAATCTGAACGAAATA  
ATGTTGTTTGTGTTTGTATAATTGTCCGAATGATTTTAAAGTGCTCGTTTTTGCAATTTGTT  
CATTAACCAACGCAATGC  
GATAATAAGTAACCTTATGTAAATATGAAACAAGACTTTTTATCATAAATATAACATAGTTA  
ATAACAATCAAATTTATT  
ATATAAAGTTTACAAAATGAGTAAGAGGTAGTAAGACAAGTCCCCCACCTCTTACTCAG  
TAAGATGTTATATGTCTAACT  
GGGTCTTACTCAAAAGAAAAAACAACAAGCAAAACGTCTGCCCTCCTTGTTACTGG  
TAAGAGTAAGAGGGAGTAAGAGG  
GCCAGTAAAATTTTTTTTTTAAACCAACACACCCTAAGTTAAATTATGACCAAGACTA  
AACCAATGATATTTGCATATG  
AAAGTTTGTTGGTCCAAGTAATTCTTCAACCACCATAATCATCTATCTTTTGACAACTTA  
ACCAAAAATGAAAGAGACAT  
GATAGAAATAACTAAAGCCAAAGTATCATTAAAAACAGATATTTTAAACACAGGTGTT  
ATATTTTAAGTAATTGTCAAT  
GTAATACAAAATTACTTTACAAATCACCTATTCCATTACTTCTAGATTACGTTAATATGTG  
TAATCGAATGAAGACAAAA  
TGTAATAAACAATATACTAGTGTAGACGTGTAGTATTAAACAAAAGATAAGAAGTGAA  
CCACGTTTGCAGAAATAAACG  
CGGCAATGTTTTGGGTGCGCACACAGCTTAGGTTCCCCTTCTCTGCGGCTACCTCTTTC  
TATATTTATCCAACACATAAT  
CATACAGATTACGTACTTGTTTCTATAATAACCCAATATAAATACATCTAACCCCAAAAC  
ATTTTATCACAATTATTCA  
AAACACAAGCATTTTCTAAAGCGAGCACTCGAACTTGAAGTTTTATAATTTAGGTATT  
TCATCAAACACTCTGCAAGAT  
>CsCML65  
ACACCCACTTTCTGAAATTTACAGAAAACATTTTAGACTTGAGATAAAATAAAAAAGTC  
GTAACCTATTTTGGGATGAT  
TTGTATAACGCAAATTAGGGTTTATGAATCATTGTAGGAATCAAAGCTATAACCCCAAA  
ATTAATTGTCATTTACAACAC  
ATAAATCAAAACCCTAAAATTAAACTAAATGGATACTTACCAAACACTATACAAATCA  
CCGGCACAGCGATGTAACAAA  
GATTTTTTTTCTTGATGTAACCAATGTTTTTTTTATCTGGAACGATGTTGGTGTTGGTCC  
ATGTTTTGGTTATTCTTCA  
CCTGCATCAACCATTAACAAATAAAAAAATATTAATTAATTATCCATTCTCAAATCACA  
ACAAACAGGAGAAGTAATAA  
AGCAAAACAATTGAAAATTTGAACTGAAAGAAGGAGCGTACAAATCATTAATTTAT  
ATGAATCTACAATTGATTTTAT  
TTGATTTATGGAACGATTGTTTTGATAAGGAGGTACCGATTGTTTTGATATATGGAGCGT  
GTAGAGAGGGATCGTATAAA

ATTGGTGCAGCAGAACTTGTACTATGAAGCTAAATAAGGCAGGGCATTAAACGAATTTT  
TAATGCAGGGTGCTTAGTAGG  
CTTGACAAAAGCTTATTTTATTATATATAAATAGATGTCTAGTTTGAATTTTCTAAGTCT  
TTCTTTCTTAACTTTAACA  
ATAAATAATTTTGGTTGTGTTATATAGTATTTGATGCAAAGTATATGAATAGATTGAATTT  
TAAATGTACTTTCCTACTACG  
TACTATTTTTATCTAATACTAATAACACAAGCAAAAATATTTAAGGTCAAGGTTGTAAAA  
GAAAGACTTGAAAAGTCAAA  
CCTGGACTAATAATATGGGACGGAGGGAGTATATAATTATTTTCATATTTTGTGGCGCTTT  
ATGTCACGCCTCAAAAACG  
CAAAAAATTCGCTTTGATCGTCAAAACATGAGGCTTAGTCATGCCGTCATATCATGCCT  
CGCGCTATTTATAACCTTGTT  
ATTTACACATCTTCCTATGACGGAATGAGCCAAAAATAAAACATGGGACGAACAAATAT  
ATGTTACATTAACATTTTTTTT  
TTTTTTTGAAGTTGTTACATTAACATTTAGAGAAAATACGAGTGTAGAAACCCGCGCGA  
TGCAGCGGGATTGGCTTCAAA  
GGACTTACTTTGTAACGACACTTAAACCTTAGGGACTATTTTTGCCAAATTGCTATAGAT  
AGCAATTAATGCTACAGGGC  
TTACTTTGCAACTACACTTAAACCTCAGGGACTGTTTTTGCCAAGTTGTGAACTTTGC  
ATTTAATGTTTGGTTAGGACT  
TACCTTGCAACGTCGCTTAAACCTTAGGGACTATTTTTGCCAGATTGCTATAGATTGTAA  
TTAATGATCTAAGACTTATT  
TTGCAGCGCCATTTGAACCTCAGGGACTATTTTTGCCAAGTTGGAAAAGTTTGCAATTA  
ATGCTTGCATCACACAACCTG  
GGTCCTGCCTTTTAGTTAATATATATAATAAAATACAAGCTTAGTTATAAATATACGAATT  
AGATTAGTAAATAAAGAGT  
TTTGTACAATAAACTAGTTAAATCATAGGGTTCTTTGCTTAGCCGAGTAAAACAAATATG  
AGGTGATCATTTAATAATAA  
TTACACGATGATTATTTATTTCAACCATGTGCAACCGAAAGCGTGTTGTATATTTCCATG  
TGGACTCGGTTTCATAAATA  
TTTTTGCCAATTTTCTAATGTTATAATGTGACAATAATGAGTTTTGATCAAAATGTACAA  
ATCACAAGCATATCGTACA  
ATCTTTTTATACATGCAACGATTGAAAACCAATGTAAAAAGGTATGTATAAACTGCCCCCT  
TTTCTAATACCTTAACCTT  
AGCCACTTGTCTTCTTCTTTTATTATATAGCTTCAATCTCCATTCTCTAAACACTAACAAG  
AAAAGCAAAATTAACAAAC  
>CsCML66  
AATACTGTCACAAGCTTTTTGAGACATACGTCTTATAGGCAAAGGTGGATAGCTATTTTT  
TCATTACTATATATATGCTT  
TATAAAAACAATATAAGATATGAAATTTCCCATGAAGTTGAAAATAATATTAAGCAC  
GTATTTTCTTTCACTGTTT  
TAGCCGTTGGGCCACTTTTCCGGCCCTAACTTGTATCATCCTAAACTGCTTCATATAAG  
CAGATAAAAGTGCTAAATTT  
TAGACAAATTAAGCGGCTTAAAAATACCAAGTATCAACCATGGACCATCTAAATGTGAA

AAGATCAGATGTTAAAAGATC  
AGGAGCAGAGTATATACTAATCAAACGGGTAAACAAATAAAATTAAGTTAACATGTG  
AAAATATCATATGTGTGCGCGC  
AGTTTGAAAGTCACAAAGGTCTCTTTCTACACAATGGTTACTTTTACAGGATGTAAGAC  
ATGGACATGATAATGATAGGG  
GTCAACCCAGCCCAATATGCTCATCTTTATCACCCCTAATTGTTCTACTGAAATTGCTTA  
TAAAACGTGTAATGCATGAG  
AAGGTTTACTTACAGTGGGCGCTTTGGTCTTCTATATACTCTCTTGAGTGTTTCAACATG  
TACTTTTTCTGAAGTTGGTG  
ACAGTTTATATGAACCTGCATCAGAATCATGTTTTGCATCAGCATAGCCAAAATATAAAA  
AGAAATTATACCTGTTACGT  
TTCAGCAATCATTAGCCTGCAACACATTAGTATAGACACGGAGCAGAACTAAACTTAA  
GGCAATGGATTTTGAAAGATG  
ATACCAACAGGAAAGCGATAACAAATATCATACACATCAGACTTCGTTAACGGATTCCC  
TCCTCTTGTCTATGGTCAATG  
CAAATACTATCTTCTATCGCAGTGTCTCACAAGCTGAGCAGTTATAAATAGTTCATGTGT  
TGGTTATCTACGGTCTACCA  
AATCATAATGTAGTTCCAACCTCAATTATTCAATAAAAAATACAAAATTGACACCCAAATAA  
AAATAATGAGATCAATAGAC  
CCACAAGCCTTAACAAAAATAGTTGAAATCTCTTTGTACTTATAAAACCTTAAATAAAA  
GATTATCAACTCCAACGCTAT  
AACTAAAAGGTAATAATGTACTTATAAAAAGAAAATTATGATGTACAAAGGGTTACCAG  
TGTCATGGCTGCTAAAATTT  
CATTCATGAGACCAATTATCTTGTGTCAGTCCGCTGCAGTCCTTCTTTGGACATTTTTTGCA  
ACTAAACGCACCTTAAACCT  
CTGATTAAACAAATAGCTAATACCACCATCATCTGAGAGGTTCAAGTAGGAAAATAAG  
AAGGTGTATAGTTGAACCATA  
ATACCATATACAAATGCGCGACCGATATAAATACATTAGCATCATCAGTACTTGAATTAA  
AACAATTCAAGTGCTACATG  
TCTTTTAAACATTAATTTGGCATTCCGAGTAATAACTTACCTGATACATAATCCAGAGC  
TAATAAGTCATAATCCGAAA  
CCAATCCCACCTGCAGTAAGAGCAAAGAATGAACCTCTGAAGACTTCTTAAGAGAATT  
TACAGGTATGGATACGCAATCA  
CTCAAATAGACACGGACAATAGCTCCGAAAAGTAAACAGCAGAAAAATAAATCAAC  
AAACCATAGGTCATTAGCAGCAA  
ACCATAGACATATATAAAAAGTGTACGAAATAAAAAGTATGGAGATTCATGGTACCCC  
GTTTGGTTCAGAATTGCGAGT  
GCGGGACGGGATATAAGGGTATCCAACCTGCCATGGCTGCAAACACAACGTCTGCTAC  
TCCGTCAAGATACGGGTTGATT  
TAACCCATCACGATTCAGCCCCGTAGTCCGAGTACTTGAATTCAATTTTTTCCGAACCT  
ATTCATAAAACACCATTTACA  
AAACCGACTAATATAATACAGCATATGCAATAAGATTGTACAGCTCTTACCATTGGCCTA  
TGTTGTTGCTGATACATACA  
>CsCML67



TCTCTAAAACATCTTATACGCCTCTTGTGTTTATGATTAGTGTGTTTGTGAAATTCA  
ATATGTTACATTTTGTAAGG  
TTGCCCTAAGAGCACATGATAAGAAGGCCAAAAAGGACTTAGGGATTTACAAAAAATGA  
CTCAATGACTCATAAAAATTTT  
ATTTTTGTGTCTTTTTTTGTCTTCTTATCTTGTGCCCCGCACAAGATATGAAAACCTATT  
TTATATATATCACAGGGTT  
CTAAAAAGCGCGACATGACGGCGTTAACGCGTAACTAAGGCGCGAGGCGTGGCATGC  
AATTTACGAAATAGATCAATACG  
TCAGCTCTAGGTGTGACGTGAGATGAGACGTGAAAAAGCACGATAAGACGCGCTAAA  
ACGCGAAGCGTGACTCCTTTTTT  
TAATTCAACTCCAATAAAAAAGAAATTTTTGAAAAAATGATAAAGATTACATTTAATAT  
TAGTTTTTTGAATTTATTCA  
TTATGTATAATTTTTTATATAAATTCAATATATATAAAATATTTTAAAAATATATAAATATT  
TCATATTTTGTGACAC  
TTTAAATCATAACTTAAAATACTAAAGCTTTGTTCATGGCTCATAAACGTAAAGCTTAGC  
CATGCCAAAACATTACGCCT  
CACTACTATTCGAGAACAACCACTGTTTTAAAAGGCTCGTAAAGGCTTCGTAAAGGCG  
TGAGGCTTGATCATGCCGTCAC  
GCCGCCACACCGCCTTATGACACATGTTTTGTAACTCAGATATATATAAATTATGATAT  
AAATATATAAATATTTTCA  
TACTTTTTGTGCTTTTATGTTACGTCTTATAAACGCAAAAACTTCACCTTAATCACAAAA  
ACAAAAACGTAAAACTTAGT  
TATGCCGTCGTGGCACATCTCACTCGATTTATAACCTTGAGAACAACACATAATTTGGG  
TACAATACTTTAGCATAAAGA  
ATCAAATCTTTACGGTATATATGTGGTTACACAATTTGTGAATCACTAGGCTTTATGTCCA  
TCAGTTATGTGACACGTGG  
AAAGAATGAGGAACACTGGGCGGTGGAGGTTTTCTCTATGTACAGTAGAAGAATCCAA  
ACTTTTTTCTTGACCCATCTCC  
ACAAAGTAGAGAATCATACAGCTGTTGACCGCCTCTTCAAATATCCTTTCGTCATCGC  
TAACGTATAACCCCAATTTT  
ATATTATTTTATTTTCTTGACATGTTATAGTCTTTATGAATGTTTAGCTTGTTATGGAATA  
ATGACAAGTGCATTATTA  
ACTAGAACAAATCACCTTCTTTATATGATCTTTAATTCAGTGTCAACTATCACGCAGATC  
TTTTGGTTCAATTGCCAAAA  
ATGACATCACGCCACTAATAAATGAATACTCTAAAACAAAAGTTATGTTTTGTCAAATG  
TCGACATAAATCTCATTTGGT  
AAGGGTAATTTAATGCATTTTCTTTTTTGTATGCATGAAATCTTTTCTTTCTAAAAGTT  
CATGGTAAAGATATATTTT  
TGGCGAGTGCATTTTAATATTGAGGATAGCAAAAAGAAAAATAAAAGATTGTTTTTTGA  
CATTTATATTCTCACATAACT  
TTTTATACATTTTAAATTGTAAAAGTATTAATTATCAACACACTCTAAAACAAAATGTG  
CAAATTAATTTGACGAGTGT  
ACAAATAACTTCCATTTTTTTCCCCCTTAAAGCATGATATTACGCGTTTTGCTACTTCATA  
TTAGCAGGTCGATATTAGT

ATTCCTTTTTTTCCTGGTCAACAAATAAATAATTTAAAAACTAAGAAATGAGCGTGCTC  
CGAAAGCCAAACTTCCTTAGC  
CATATATTATTCCATTGACCCCATACCACGCCTATATATATCTAACGAATCCCCCTTAT  
TCCCGGAGGAAGAAAAAG  
AAAAAACATTACACACATTCATTCCAAACCACAAAAACCCTTTCATTAATTCTCACAC  
ACACACAATACACCAACAAC  
>CsCML68  
GAGTGCTATATCAGTTAATTTGGGAAGATCAAAATTGTATTTCTTCAAGCAAATATAAG  
TAAAACCTTAAAGTTTTGGG  
AGGGCCATTAAGATCCGTCTATGGTTATACTAATACGAACAGTCATCTAATATGAGTAAT  
TGGGTACGTGGTAATTGTTA  
GAAGAATTAAAAGTATTAAAAGAAAAAAAATACGGAACAAAATAAAAAGGGGGTG  
AGGATGGTTAAATGTACCTATTT  
AAAATATGAATAAAGATGTAAAAGAGCAAAAGAGAACTTTTCTGATTACACGTCAAAA  
ATCATGTGTGTTACATACATTAT  
AAAGATTCTTTGGTATCTATTTTTCTAATGTTGTAACATGGAAGGAAGAGGTTTCAATA  
ATTACTAAAGCTTTAATGAG  
ATAACCCCAAAAAGGTAATGGATTAAAAGATTCCAGGTATCTCTCATATGCCTCAATGC  
AAACAAAACCTCAAAACATTC  
TCATATTCATCATTAAAGATCAAATCATCAGCTTTGAAAAATCAAGTATGCCTTCCAAAGG  
AGACGAGGATGATCGCAACA  
AAACCTTAGGTAAACCAAGAAAGTTTCTTGGAGTAAGACAAAGGCCATCAGGAAGAT  
GGGTATCCGAGATCAAAGACTCA  
ACAAGAAACCTAAGGCTATGGCTAGGCACATACGATACTCCCGAAGAAGCAGCCATGG  
CCTATGATAGTGTGACGCAT  
TTTACGCGGGAGGAATGCAAAGACAAATTTCAAGTACGAGTGTCTCATTGCTACTCAT  
GAAGAGATCTCCAATTTACTAA  
GCAGAAACCCTAAACTCTTTCATTTTCTCAAATATGCCACCATGAAAACCTTTTCATCAT  
CCTTAAGAGCAAGTGATATT  
GTAAACAATATTACACAAGATGAAACACCCCTTGCTTGTTCTTGGGCTTCATGTGATGA  
TGGACTTAGGGTTTCTTTTGA  
TTCTCAAGATGACGGAGAGAGTTTACCGAGGCTCAGATCATCAACTAGAAATTCTAAG  
GTTTATTCTTCTGTTTACGTAG  
CTCCCTCTTTCAATGTAATAAAGAATAGCTTGTTGATGGTGTTGATTCAACTTTTCTG  
AATTTATGTTGCTGATCAAT  
TTAGGTTTTGCCAAAAAATATTATCAACCGTTTCCGTCTTGTTAATGTATCAAATTTGTTT  
TAAAGACATCATTACTTTG  
TTGTATTATGTAAGTGACATTGTCTATCAGTATGTTTTATGCTTTATTGTATGTAGTGTTTT  
TTTAACGGCTTTTGTGT  
GTGTAGCGTATCTAACTGTACAATACATATCATATTATGTGCATAGAAGATTTAACACAG  
TACAGGTTCTGGTGAGTGAT  
AGACTCGTGTATTTCTGCGGGCATCGATTCTACATGTGTTGGGATCAGCATTTCAGTG  
ATTAAGTAAATGTGCTAATCT  
GTAACAACCGTCTAACATAAATAGAAGCACAGTAAATCTAGTTAACACAAGAAGTCTCAT

CACACGTGACACGTCTAAAGAA  
GAAAAGAAGTTAAGATCTATAAAGGCTTGTATGAGTTACTAATAGTCTTAACCATATGGT  
TTGATGTTGATTTTTGATTT  
TGATTCATGATATCTCTCGATCGTGTCTATGTCAAATGGTTATTGTGTTTGATCAAACAT  
GATTTTAGGTGCTGTGATG  
AATTCAGGAATTCAAAGAAGTGGATGAATGAAATTTGTTTTGTCTTTCTAATTTTGGCT  
AAAAAATTAAAACATTTCAA  
ATTGGAATTTTCAATACTATATTTCTATGTTTAGGGACTAGATCTATATAACATTGACTAA  
AAGACGACCAAAACCAATA  
AAAAAATCTCACTTTTTATGCCATTTTATGAGGGAGGGAAAAACATTCTCCTTGTGGCT  
CTCATTCAGCTTCCATAACAT  
ATATATGCATGCAAACAAGAGGCCACAATCAATATTTGAAGGCCACAAATCTTCATCAC  
CACAACACAACCACCATCACA  
>CsCML69  
CGATTTTCTCCGCTTGAAGAGAGCTTGTTGACATAGTGCAGTGAACCTCGAGTTGGGT  
ACTCGGGGAGCGGAGTAGGGCG  
AAGAGTAGCTTCATTACCTAACCAATTTATATCTTAGTGTGTTGGTTTGATCTTTCCATCT  
CTTTACTTTGATCTTATAT  
TTTATATTTCTTAGTTATCCTTGCTAGTTATTTTTAGTTTAATTATATTAAGTTCATATTATT  
GTTGTTTGATCTCGCAT  
AAACTCGAATCTAGTTTTTTTTGAAAAGAACATATTTTAAGGATAAAAACGGTAAGGATA  
TTTAACCTCCCTTTCTAGTTT  
TTCACATAATTAAATTAAAGGTAAAATTGCAATTTATAATGAAATATGAAAAACCATCAT  
TTTGAAGCTTATAAAAAACCT  
CTTATTTATTCTTAATGGTAAATTTATTATGAAAGAGCCAAAAAAGGCAACAAGAAACA  
ACTACTAAACAAGCCCAAAGT  
AAAACAGAGCTTAAAGGATACATCCCTAAAAGCTTACTTTTGCTGAAAATGCACAATG  
GCCATGGACATACCCATGCTCA  
ATCATAAAGTTTAGTCAAACACTTGTTGAACTTATCTAACATATATAAGTTAATAAGCT  
TATAAGCCAATCATATTAA  
CTTAGACTAACATCCCTGAAAACAAAAAATATTCCAATTAAACTTTTTTACCCATTTTAT  
AAAGTTAAGAAAAAAAATTC  
AGTCTCACAAAAGATTGATAAACTTATCCATGGGCTTTTAAATTTATTGAAAAACACC  
CCAAGAATGCCAACGTATGTA  
CTAAACATAATACAATAATACTCAAGCTAAACGAAAGTAAATGAAATTATTTTCCTAA  
GATGAACATAAACACATTAGT  
GACGGAGCCGCTAGGGGGGGCTGGAGGGTGCTCGGCCCCCCTAACCGGCTCAACTG  
CCTTAGATATATATGAGAGAAAC  
AACCTTGGAATTAGTTTCATTTTGATGAAAAAGCAAAGAGGGAAATATAGTTAAGCTCCG  
GCCATAAGATAGACGAAGAAG  
ATGAAGGTTTAGGTGAGAGAAAAACAAAAAGTGACAAAATTTTGATTGATAACTGGA  
ATAATATGTAGTGTAACACTGG  
AGTATATTATTAAGGTCAAGAGTAAAAATCTTCTAATAATACTTTTTTTTTTACCTACACT  
GAAGCATACACTATATTTT

GTTTTGTGGTGTATTATATAAATCAACTTACATTTAAAAAATATAAGTGAACTTTGTTA  
AACTATAAGAAATTTGTTT  
CTCGACATAAATTTAAAATCTTCTTAGTTTGTTTAATATGTTTTGTTACAAAAAGCCGC  
TGAGTCAATAACATTTTTAT  
TATCTCTATTATAGTTGTAAGTATAGCATTTAAATCGATACAATCTTACACCTTTTTTTCTA  
ACTATATGCCCAACTGGA  
TAAAACTGTTTACCAATTGACTTGTTCACTGGTCGATTTTATCGCATTGGATAAGTTGAA  
GAACCTTCGGATAAGTAATT  
GTCAGTTACCACGGAAAAAATATCATTGGACCCGTATATCGAACGATTCAAGCTTCAAT  
CTAATTTTTTAAAAGAAATAAT  
TGTATGTTTTTACAAAGAAAAAAGCCCCCTTAACAAAAATTTCGTGGCTCCGC  
ATAAATACCACTTTACCCATGA  
TACCTTCTACAAAAGCAGAACACGAGCCTTAGATATGTGTAGATATGACAACCTACATG  
TTTAGGTGTATTAAAACTTAT  
CCATATAACTTTACTCTCAAGATCGACATGCATGGAAAATGCTACGTAATTGCAATGTGT  
AGTGTGTACAATCCATATGC  
CATCTTCTATATTCCGGCATCTTGCTTTTTTAAATTTCCCATGCTTCTCATTATTGCCCA  
CGAACCACTACCTTACAA  
TACATCTATAAATATCACAACTAATATCGACCATCCATCACAATCTTCTTGCAAAAAACG  
TTGATAACCATTAACCAGCA  
>CsCML70  
AATGCTTTGTGTGTATCTCCTTCTCCAACCGGTTCTGTTTCGTTTTCTTTCACACAAAG  
TCTCCTCGGTCTTTCTTCCC  
CAACACCAGATTTCGTTTGGTGTTCACGATTTGCAACCCCTACGTAAATTGGATCGTG  
CACTATCTTCTCTACGCGTCT  
CCTTATTCAACGTATGAAGTTTGTTCCTTGGGAAGAATAAAGAAAAACAACTGATGTC  
GCTCAAAGATGGAATTGAATT  
CTATCTTCTCCTGCGTCTTGTTTTCTTGGCGTCTCGATGTGGTTTGTATGTGTCGAATATG  
GAATGATTGAAACCCTTGC  
TCTTGATGCCAATTGTTGTCCCAAATAACTAGATCGATTGATAATAGGTTGCAAAGTAA  
AGAATTGAATAAGTAATGTAA  
ATATTGTCTATGTGATTAACCTTTTATTCTGAATACATGTATACATATATATAAGGTTATGAA  
ACGCTGCATGTGAAGCGT  
TGCAACCTTTCACCATGTCCCAACCGAATCTTAACAAACATAACTGAATTTTCGGTTGTA  
GACTTTCATTTAACATCTTT  
GGTCCTTAAGGTTTTAACTAACATAATAACAAGAAGTAATGTCAAGGTTATCGGGTCAC  
ATCCTGGCATTCTTCTGATAA  
CAAGAGGCAATGGATTTTGATATTCGGTTGGTCCCCACTGGTCCATACCATCTAGCGGG  
TAGATAAAGTGTTGGTAAACA  
CATCTCTTTAACTGTTGTACTCCCTTAAACCTTTCACCTAAAACAGGTCTCATGAACTTC  
CATTTTGTGTTTCGGGTGTG  
AATTGGCCAATGATCTCCTATTTTATCCTGATCTTCAACATTAAACTCATCATCAGGACC  
TACCTCCTTTTCAATATATT  
TTTCTCTTCTATTCCGTTGAACAATCTAGCCAAAAAGTTATCATCAAACCTTTTAGTGG

GTTTCTTCTTTGTTTTAGGG  
GCTGTTTTTTGTGATCTTACGTCAACTACTTCATCTTCACCATCAGACAAGTGATCTAAT  
GATGCAGTGTCAATCATTATC  
AGAGCTGTAAACAGAATAAACATCATAATCATCCTCCTCGCTTTCCTAACAACACTAT  
CTGCTCTAATGTGTTCACTAA  
ACTCAGAATGTGCCATGTAAATATCTGTTTCACCATTATTCCTAAGAGCATACTGTCTAC  
AATTACGCACGCCATCATCA  
TTTTTTAAAGACCTTAAGCCATCTTCTAAATTTGTACCAGACACAAGAAAGTATAAACC  
TTTGCAAATAGAGTGACTTTC  
AGTTTCTAGATAAGAAACAATCTGAGAGTAATCCATCGAAATTAAGTCTATATTTTCGAG  
TTTCTTAAGCATACCATAAT  
CATACAAAACAGGGTTTGCTTCAAAGACTCCACCATAATGAAAGTTTATGGTTATTTGA  
GTAGAACATGATGCCATCTGA  
AACAAAAAATAACAAAGAAACATAAATTGAAGCCCTATTAACAAGTTACATGTGAAAA  
TAGATGAATTACCTTATGTATG  
AAGATGAACTGAGATCAAATGTGCATGAAGATGAACCGTTTATGAGGTGGTTGTGTATT  
TTTTTTATGGTTGAGAGTATA  
TGACGACATATGTTAATACTAGGGTTTAATCACCAAAATTATTTAATTAATTAATTTTATT  
TCCAAATGTGCCACGTCAT  
GCTCTTTTTCACCGGCTTAACCTGTAGCATGATGAAAATAAACGGTTTCCTAAATTATAGT  
GATGGTTTTTAAAGAAAAAT  
TAGTAGAGTGACTCAAATAGATATTATGTGAAAGTAGGGTGTCTTTTCAGTGCTAAAC  
CCATCAATAAGTAAGCATGCC  
GAAATTGCCATATTGACTAAATTAATTTTAACCTAACAAATGGTCACCAATTACAGAGA  
CGGAGAAAGGAATATTTGATG  
AGATATTGAAAGGAGAAATTGATTTTGAAAGTGACCCTTGGCCATCTATCTCAAGTAGT  
GCCAAACATCTTGTCCAAAGA

>CsCML71

GAATCTTTTGTGTTTTGAACTTGTTTCAGTAACCGAATTGTCACGTTTGCGTTTAAGAAC  
CTTAGAACTTCATTTTTTTT  
CCTGTAAATGCATCCTTTACGAACCTCATCATCACTTGGTGAATATGCTTTTACAGGAACA  
TATTTCTTTGCCTTCTTTGA  
AACTGTACATATCAAACAAACACATAATACATTTATCAGTAACTGATGAACCAAATAAA  
ACCGTGAACAACCTAACTGATG  
AACATTACAGTTGATGACTATAATTTAAACAAAAACATGATGAACAAAAGATGTTGGCA  
AGTCAATAATCTTCGCAAACCT  
ATCACTATCAATAACTGATGAACAAAAAAATAACTGATGAACAAGGATATTATCATGTTA  
CTGATGAACATAACATATAC  
TTTGTAACAACTATTATCATCTAACAAAACCAAACAGCCTAATAATCTTTGCAAACCTATCA  
CTATCAATAATTGATGAACA  
AAAAAAATAACTCATGAACAAGGCTATTATCATCTTACTGATGAACATAACATATACTTT  
GTAAACCTATTATCATCTAA  
CTAAACCAAATAGCCTAATAATCTTCGCAAACCTACCACTATCAATAACTGATGAACAAA  
ACAATAACTGATGAACAAGC

CTATTATAATCAAACCTGATGAACATAACATAGACTATGTAAGACTATTATCATCTAATAAA  
ACCAAACAGCATAATAATC  
TTCGCAACTACCACTATCAATAACTGATGAACAAAAAAATAATTGATGAACAAGCCTA  
TTATAATCAAACCTGATGAACA  
TAACAGACTTTGTAAGACTATTATCATCTAACAAAACCAAACAGCCTAATAATCTTTGC  
AAACTATCACTATCAATAACT  
GATGAACAAAAAAATAACTGATGAACAAGCCTATTATAATCAAACCTGATGAACATAAC  
ATAGACTATGTAAGACTATTA  
TCATCTAACAAAACCAAACAACCTAATAATCTTCGCAAACTACCACTATCAATAACTGA  
TGAACAAAAAAATAACTGAT  
GAACAAGCCTATTATAATCAAACCTGATGAACATAACATAGACTATGTAAGACTATTATCA  
TCTAACAAAACCAAACAGCC  
TAATAATCTTTGCAAACTACCACTATCAATAACTGATGAACAAAAAAATAATTGATGA  
ACAAGCCTATTATAATCAAAC  
TGATGAACATAACAGACTTTGTAAGACTATTGTCATCTAACAAAACCAAACAGCCTAAT  
AATCTTTGCAAACTATCACTA  
TCAATAACTGATGAACAAAAAAATAACTGATGAACAAGTAACTGATGAACATAACAT  
ATACCTTGTAACAATCTATTGT  
CCCACCTTTTAAATGAATGCAGTACCTTCATTCCCGGGGAGTTGCAGACGGTCGTGTCTA  
TTTTTCGATCTTTTTTTCCTTG  
AAGAGTTCCTCTATTTTTCTGTCTATCTAAAAATTTAAATAAAATAAGATTAAAATAATTCT  
AATTCTTCCTGAACAGTCA  
GATACTCTATTTCTCCATCATTTTTCATTTTATTTTCTTATTTGCTTAAAAAATTAAATAAA  
ATAAGATTAAAATAATTC  
TAATTCTTCACATAATTTCTCCATCATTTTTTTCATTTGTTTTTCTTATTTGCCTAAAAATTT  
AAATAAAATAAAATTAAA  
ATCAGATTATTCAAAAATAACTAAAAAACTCATATATTTTTCTTTATTTCTAATAAACTAA  
CACATAACTGATGAATGCA  
AAAACCTAAAATTAAAAAAATTAAAACAAAATTAAACAAAAATTAAAAAATAAATCATC  
AACTTACTTTTAGTTTTTCATCT  
TTCCGAGTGCAAATCGTTCACTTTAATCCGTAAATTTGAGTGAAAATCGTGTTTTTTTTTA  
TCGGAATAAACCCCTAATTAG  
ATCCCCAATTATAGAGAGATGATTTTGAAAGTGACCCTTGCCCATCTATCTCAAGTAGT  
GCCAAACATCTTCTGCAAAGA

>CsCML72

TTGTATGTTTAAAAGTTGTTTCATTTTGTTGAGTTGCTGTGTTGACTTAAGCTGTTATATT  
GAAATGTGATTGTCAGTTTT  
AGAGGGTGTTTGTTCGGATTATATAGTTGGCTTATGGCTTATTTGGTTTTGGGCTTATGT  
TTTAGAGGGTGTTTGTTC  
GTATCTAGTTATTGTACTTGCCACTGAAAAAAATCACTCTTATTCGGAAAAA  
AAAAAGGTTTTTGGCCAAAA  
CAGCATGACTATGTTTCTACTGAAAGTTAGCGTTTAAATGATTTTCTACTTTAGTTGG  
TTTAATTCAAGTTTTCTAAG  
AGTAAGTTCTAGAAGATATCAGATTCATTCTTCGATGAGTTTGTGTTTGGTTAAATTGG

TGGCTAGAGTTTTGAGTTAC  
TCTAGTTATGGTATGCGCCCGCGTTTTGTGTTGAAAGTGATCGAGTGTCTATCTATGTCT  
TAGACAAGAATTTATGTCCT  
GAGCCGAAAACAGACCAAAGTTTTCAAATTAATTTAAGTATCGAGATTGCAGAGTAAG  
CTCTTGACGATATTGGATTCTG  
TCTTTCACGATTTCCATATTTAGTTGCCCTAAATCTTTTAGTTACTCTAGACTCTAGTTAT  
AGTATAAGCCTGCTTTGTA  
ATGTAAGAAATCGTGTATAAGAATGTCAGGACTTGGGATGAAAGGCAGATCGCATATAA  
GATTCGGATTTTAGGAACCAT  
TAATTAGGTAATAGGATTACCAAAGGGCTTTGGCTCGGTTGGTACCCACCTCCGAAAAA  
CCTATGAGCCCACTCGAGAGA  
TTTTGTAGATAAAAGGTCATGGGTTTCGAGTCTCGGCTCGTGCTCACTCCAGTTGGGGTG  
CTCCTCTAGGCCAGGCCAGGA  
GAGTTTCCGGAGCTATTCTTTGTGGGGTGGACAATGGCCGGTGCCAAAAGGCACCCGG  
GGTCAGGGTGTTCCTCGCCAATC  
TACACCTTTTATGGAATTAGGAAATAGGATTTTATGCTGATATATATCTGTCTAATTCATT  
CCAGCAGTATCTATTCTA  
TGTTTATCCCTATAATTTAGTATTTGGAACCATTAATTAGGAAACAGTATATATTCTTATGT  
GATTTTCATGTTTAGTTG  
TTCAAGTCTTCACATGTTTTGTATGTCTACTATCTATATTCAGCTTTTATCATTACTCAATA  
CACGTACAACATAATAAT  
ATTAGTTTCCTGAAGTTATCACTATGTGCAACTCCCATATGTTCTATATAGGTATTACGTG  
TGTGGTTAAAGAAGATTAG  
CATGTTTTATATGATAAAACGCGTGACATCTATCTCCAAGTCAGTTTCAGGCAACACAC  
ATGTTCTGTGTGCTTAACCAC  
TCGTGCATATAAGAAGATAAGTATGTTGTGCATGATTAAAGTGTGACGTTAATCCCCAC  
AACAAGTCATGCAAAACCAAT  
TTGTAATTCATAGGTCATGTCACATGTGCTTGAAGAAATTTAGCATGTTTTTACATAATTA  
CATGATGAAACATGTGATG  
TTTATTTCCGACCGATTTTATTCAACATCCATATTTTCCACATAGGTATATTCATGTGATTC  
AAGAATATTAGTATGTTT  
GATTTTATAAATCCCGTGATATTTGTCTTCAAGCAAATTTCTCAAGTTCATATTTATGAC  
AAGATTTGAACAATACCAA  
TATACGTTTGCTGAACAAAATTAGTACTTGGTAGCACAAACAGTATTTTCTCTGTTTTTTG  
TTTGTAACCTATTGTAGCGAG  
ATTTTCTGATGAAGTATTGTTTCTTTTAAACAGATATAGTTTGATTGCTCCTCTCATCAA  
GTGATTTGCAAACTTTAAA  
TCATAGCAGCAATAGGAAATGGTCAAAAGGTTATTTCTAATCCTTCAAGAAGTCGCTAC  
AGTTTTTGCATATATTGCGTT  
TAGTTATAAGGCTTTTGACATTTTTTTTTTTTACTTTATTCAGGATCAAGTATGGATTATTT  
TAATGTGCAACAAATAAT  
>CsCML73  
TGACTGCTCCCATTAGCAACTAAACGAGCCTTATAGCGGCTCAATGTCCCGTCAGCATG  
AAACTTATGCTTAAATAACCA

CATAGATCGGACCATATTAACACCTGTGGGCTTTGGTACAAAAATCCAAGTAGCATTTT  
TAACTAACGTGTTATACTCAT  
CATACATAGTATTACGCCATTGAGGATCTTTTAGAGCTAGAAACGGAGATTTGGGAATA  
GGAGAAATCGAGGACGTGTGT  
AAGGATAAACGATCAATGGGTTTGACAATGCCCCGATTGAGACCTAGTGATCATGCGGT  
GAACGCGTGAGGGTTCGGTAAT  
GGGCTGTTGAGATTGAGCCGAGGGATTGGTTGTTATCGTGGGTTGAGCAGTTGGTGGG  
TGTTTCATGGGTTTGGTTAGTGT  
GTTGTTGGGCCGGAGTGGTTGGGCTAGTGTTTTGATCCGAGAGAATGGGAGGTATAAG  
GGGTGACTATTGGGTTGAGGTG  
TTGGTTTGGTTGGTGGGTGGAGGAGTAGTTTGGGCCGGGTAAATATGATTAGTGGAATG  
GGGTTGATCTGGTGGTACAGG  
TATATGTAATAGGTGATCAAATAATGGAGTATGCATATGTTCTAAAAAGGTGTACGAGGG  
TGGAGAATCGGGGGTCATTG  
AGCGGTACTAAAATTGAGTTTCGTCAAAGTGGCGTGTCTAGAAATAATGATTTTATTT  
GTTTCAAGGTTGAGGCAGCGG  
TAACCACGGTGATAGGCGGGAAAGCCCAAGAAGATGCACGGGGTTGCACGAGGCGCA  
AGTTTGTGAGGGGAGTGTAGGTG  
GGGGTAACAAAGGCACCCAAATATGCGTAATCGGGTATAGTCAGGTTCTTTTTGAAAA  
AGGCGAGTGAAAGGGATTTCGT  
TGTTGATGGCGGATGAAGGTAGAAGATTAAGGAGATAAGTGGCCATATGATGGGCCTC  
GACCCAAAATGAGAGGGGTAGG  
TGTGCTTGAAAGAGTAGGGTGCGTATGATATTATTGATGGTTCGGATCATTCGTTTCGGCC  
TTACCGTTTTTGTGAGAGGT  
TTTTGGACAAGAAAATCTAAATTGTATTCCATGTATATTA AAAAGTGTGTGAAGTTGGTT  
ATTATCGAACTCACCACCAT  
GGTCACATTGGAAACTCTTGATTTACATTTAAATTGATTTTAAACATAATTACGGAAAT  
GTAAAACTTATCGGAGAAG  
TCCACAAGTCGGAATGAATAATATCAAAGCAATTTTCAACAATAGAATATGAACTATGA  
AAACGGAGCTTCACATGTTT  
CCAAGTTAACAAGCATTACAAACATGTGTAGTCTTTTATTTATTACACGAAATAAAGTG  
GCGAGAAGTAAGAGATCGTAG  
CACTTCATCACCGTGATAACTGAGACGTTGATGCCTCGTGGAGGAACCTGTGGAGACC  
AAAGCAGTAGGGATAGTTAACG  
GCTTGGTAACTGGGTAGAGATCGCCCTAGCTGTCACATCGTAGGAGGATATGGCGAGT  
CAAGAAATCCTTTACAGAAAAA  
CCAATATGGCGAGTCAAGAAATCCTTTACAGAAAAACCAAATCGCTAAACATGATAG  
GTATATATGATTACAAAAAGGA  
GATTCTAGAACTAACACATGGACTGTGACTAATACATACGTAATGGGCCTAAATACTAG  
TAAATACTCAATGTTATACAA  
TTATCGACTAATAGTTTTTTTTTTTTTTTTTTTTTTTTTTTTTTGGTTATCTACCATTGAAATT  
ACCTTAAAAAAAACCTCTT  
ACATTTTTTGACATATGTAGAAGTAGATCATTTTGTTTTATGAATTTTGGAAATATCCCAT  
TCTTTATTGAACAAACACA



CGAAAAATACTTAAGATCCAACAATAACGGTATTTACTTTTTTCATCCTAAATATCGTAAC  
CACCCATGAATGTGTAAAT  
ACATTTATCTCAACCCAACAATCAAACTAATATTTATGCATGCATGTAATTTTCCCATAA  
TAATCATAACAAATCTATC  
>CsCML74  
AAAGCTAGTTGGAGGAACTGTGGTGAAGTTGAAAAGCTAGTTGGAGGAACTGTGG  
TGAAGTTGAAAAGCTTGTTCG  
GCAGCTTTTCTGGACTTGGGAATTGCTGAGAAAAAATCTTTCGAGACATTTTGTGTG  
TGAGTTGTGTGTGTAACCTGT  
GACTGGTAGGGTTGTATATATAGGCTCATATAATCCCGCTCAAACTATAACGTTTGAAT  
TTAAAATTTGAATTTGAATT  
TTAAAGTACCCCGCTCCTATTTGAATTTGAATTAGCCCGCTCCTATTTGAATTTGAATTA  
CCCCGCTCAAAAGTATACGG  
TTTTGAATTTGAATTTGAATTTTAAATTTGAATTTGAAATTTGAATATGATTTTTTGAATT  
TGAATTTGAATTTCAAAAC  
CACCCCTTTAAATAACAATTTATAACCACCGTTTTTCCACATCTACATTAATTCAAAAAA  
AACACAAATGTCTCAAAATC  
CGAAGTGGAACAAGTCTGAAGAAATGTTGCTTGCGCAAGTTTGGATAGAAATTCGCA  
AGCTATAGATATGGAAAATAAC  
CGTCCGAAAATATTTTTTGGAACGATGTTATGGAGATGTTCAATGATCAGACTACCGAT  
GACCATCGTACAAAAAATTC  
AATCACGGGTAAATGGACGAGGATTAACGTCGATTGCAAAAAGTTCAATGCAATTTAC  
AAACATTTGCAGCGTCGAAGTG  
GTCAAAATGACCGCACTCATCTCGAAAATGCGAACTATACTTTAAGCAACAATTTGGT  
GGAAAGGAGTTCAAGTATGTT  
CACGTTTGGGAGATTTTGAAAAATTGCCCGAAGTGGGATGTCGAAGATCCGATCCATT  
AGTATGTGTTGTATTTTTTTTT  
ACTCGTGGCGTTTTTTTTTCCCGTATCGTGTTTTTTTATTATTACTGTGTTATGTATTGTA  
TTTTTATTTTGAATGAAA  
TGAATTTAGTTTATTTGGGAAATTGAATAAAAAAATAAAATGGTAGTGGTGGACCCCA  
AATGAAGATGTTGGGGTTTGT  
TATGAGTGGGGGGGGGGGGGGGGGGGTTTGTGTGGTTAGTTGTGGAGAAGTGAG  
ATGCCGATGTGGCGCTGAGGTGG  
TACTGATAAAGTGATGATGGTCCATCACGACACATTCCCCTCTAAGAGCATGAGCAATG  
CATCAAGTCATAAAAGACTTG  
ATGCATTTAATGCAATTAATATTTAAGTGTACTATTCAAATTAAGTCATTCTGAGAAT  
TTACTACAATGCAAAATGT  
TGTATCAAAAGCTTTTCAAATATTTATATAATAAATTATGATCAAATCTATGCTTTAGAA  
GATGAAAAGCTTTTTCGCTC  
AACCACTTGAAGTTTATCAAGTCTTTGGGTAAAAAGTCTTTTACCAAGTTATGGATGCA  
ATGCAAAAAATGGTGTAAATG  
ACTTTTACAAATAGTACCAAGTCATTCTTCAAGATAGCATTGAAGATGCTGTAAGTCTC  
ATTTGGCTCAATTTCCAGAAC  
GACACATTGTTTTTACTTACTCCGTATAATATTTGTAAGCATTACATTTTTTACCCTTATATT

ATATTAAGTAACACTTTA  
AATTCATTCAAGATGTTTAATCTATTTCTTGTTTCTTAAATGTCTTTTTGATTTTTTTATTT  
ATCTTTATACTCCTAATT  
TTCTTCACGTGATTTTTAAAATATATACCACAAAACCTATACACATAAGTTAACAAAAC  
ATGTGCTCTAAACAAGTTAT  
AGGCCCAAAAGAATTAGACCCATCTTAACTAGACTAAGCCCATAAAAGCACTTAACAG  
CACGATTACTTTTTAAGAAATC  
CAAAATACTAACTCGATTTATTTCAACCAATTATTTCTTTTGCATCCACGTAATATGCAAA  
CATGAATTCCCATGCATTT  
CTACCTCAAGTTTTCTTCCATATTCATCATAAACATCCCAACAAAACCAAACCAAAAAC  
AATATCGTAAAATTTCCCAAA

>CsCML75

TAATGATTATAATTATAGAAAGTGTTGATAAACATATAATATTTTATATTAATTAAATGTTG  
ATTATTACAATAAGAAAA  
GCTTAAGTACAACCCAAAAGAGTTGTACTTAACAAAACCTATTAAACATCTGTTAAGAT  
GTTTGCTATTCACCAAATATT  
AAACATAAAACAAAAGAGGAATGCTAGGGCCACATAAACTTTTCACAAAAAATCTCC  
ACTCGCTGACGTGTCAGTGGGT  
GATTGGTTTTTTGTGGGATGTGGGTGATTGGTTTTTTGTGGGATGGATGTGGATCCAC  
AAAAACCAATCACTCGCTGA  
CACGTCAGCGAGTAGGGATTTTTGTGAAAAGTTTATGTGAATGTAGCAAATCCCAAA  
CAAAAAAGACAAAAATAGTCCA  
TGTGGCTTTTTTTACAATTACAAATGTATTATCTGAAAAGTTGTAAAAAGGTCCCTACGA  
TTTACTCTTGACTACATAAA  
CAATCCCTGTTTTATATTTAAAGACTTTTTGTGTAACAAAAGTTACATAAGCATGTCTC  
TAGTTACTTGCGATTACATA  
AAAAGTTTATTTCTAAGGACTTTATTATACATGATGTTAAAATCGAAAAGGCTATAAGAA  
TATGTAGGTTTTGCTTGGCA  
CAAACTAATAATTGGAGCATGCCGTTATATGATAAAATCAAAAAGAACCCGTTTGAT  
TGTCATGGGTTTCTTGTAATC  
TTTATTGATAAAAATAACCTTGATTGACGTACGTTAGCACCTATCAAAGTCACCGGTATT  
GTGTGACAAAACCTCAATGAA  
TGTTGGGGTCTGCTTGGTATAGGATTGAAATGGAGCAAGTTAAAACTCAATAACGCCTA  
ACATCAAGAACTCAATAATA  
AATAAAATGCTTATAAAAAGCTTAAATAAATTTTAAAATTGAAATCTTAAAGGCAAAGCT  
CAAACATAAACGGATACATTA  
GAACAACGAGTAATTGCTATATGAAACAACCTGAAATGTCGAAGCCAAAAATTCAGTAT  
CTAATTTTCAATAGAGGTGAAC  
TATGTTTTTCCCGGTGGTGAAATGGAAGGGAAGAGGAGAAAGATTAGTACGTTTTTAC  
ATAGCAAGACATTTTGAAAATT  
CGCTATCTTAATACAAAAGGGTATATTAGACATTTTATAATTTATTTATGTGGTAAGAGCA  
AGTGGTGCAGTGTCATATG  
GCATTGTTATAGGCAATTTTTCTTTTGTCTTATGGCATAACCAAATTGCACCGGCCCAAA  
TGCCAAAGCTATGTTATAGG

GCCGAATACATTTGGGTTAGCGAGAGTTATGAAGCTCTTTTTTTTGGAGTGAGTAAGGA  
GGGAGTTATAAGAATTTTAAT  
AAAAGTGTGTTTATGTTATAGTGATGTTATATAGGGTATATGCTGAGGTGGCGGGAGGAT  
GATATGTTATAGGGTGCAAC  
TACACCTACCTCTCTAAGAATCAAATTATTATGTGTACATATCAATCCCCATAATTATTTG  
ACATTGTAAATTGCCGTCG  
TTATGCATGAATAGTGCCCTACTCTTAAACAAATATATAAACTTGGTCCAAC TTCATAAG  
TTTTAGTTGACTCACCAAAC  
TGCACACGTTACTATTTATATTTAAACCCTATTTTTAGTTTAATTTATAATGTTTATTGT  
TTTAAATATATTTTTTTA  
GGTTTTTTTAGAAGCACAAATCTCTCAAAAGTGAAGATCGTCCAAAAAGCATAAACT  
TAAGGCATTGACTCTTGACAAA  
AGAAGGTGTAAGTCAACTCTTACAATTTCAAAGAAACGACTTCTTTTACCTCTAATTTA  
TTGAACAAAGAATTCTCTTTT  
GGACACTTATGAACTCTTACCCATTTTCTACGCAAGTTTCCTGTTATTTATGCTACCATAT  
TTTCATAATATCAAACCAA  
AAACTTCTTTATATTTCTCTCAATCAAATTCTACATATCATATTTTACAACAAAGATACA  
AGTGCATAAGTTGTTGACG  
>CsCML76  
CAGACTGTCTGCAATGCTTTCTGAATTCCGAGTAAACATATCCTTAACTGTATTATATTAT  
TGTTTGGCTGTCTAGCTAA  
CAATTTATATATATCTGCTTATTGTCATACCCATAAAATATTGATGTTATTGGTTTTGTTTT  
GCAACAATATAGCCTATT  
ATAGCCATAGTATTATAAAGTTCTCTGTTCTGTCAAATGGTACCATCTTTGTGTAAGGGG  
ATTTGTAAACCAGTAAGTAT  
ATAGGGTGATCTGAGCCTAGTGTAGGGTTTATTCGGGCGGACCGCAGATGTCTTCAGTT  
TATAAAGAATGCAAAACACCT  
ACATTTTCTCTAATGGTGGACAGACACAATGAAGATTCCAAAATCGTCTTCTGAATCAG  
TTCATCTCTTAATTCTTGGAT  
CAGGTCGCAATGCACAAACATTGAGCTTGCAATTTATGTATGTTATTTTTAAACCTTTT  
TTGGGAAGAAATATAGCTAT  
ATTGATTGTTAAGTTAAGAGATCCAATGAAGTTACATATATAGATAAAACATCATCTCAT  
TGAAAAATTAAAGCTATTGA  
ACTAACAAC TTGAACTGACTTTTTTTTTACCGCCCTTGACGCTTGAACAAGCTGCCA  
GGATGTTTTCATAGCAACGTTT  
AGTTATGATTATCTCTTCATCTTTATTTTATAAATCTCGACAGAAATCTATGATACCTCTG  
ACCCGTTTTCATTAACCC  
TAAACGGAAAAAAGTACCTACATTAATGAATTCAAATGTTATCACGCTAATGTTGTAA  
AACTGATGAAAGTCAGATGAA  
GTAAGATAAAAGTGTGTCGGTATTGATAAACCTTTCAACGTGAATGTCTATTTTCATGCG  
ACAAATGTGTGTTATTTTTAT  
GAACTAGTTGGGTCATGTGCGAACAAGTTCTTTTTTTTTCTGTCTCATGTGGCAAAT  
GTGTGTTATTTTTGATGACAT  
AGTTGGGTTATCAGCCAACAATAGCAATTTATTTTTGTCCAAGTCTATTTTAGCTAAAGT

ACATTTTTATATGGGAGATG  
ATTTGTACACTCTCAAAAGTGATTGATACACTCAAAATAATTGTGTTTGGACATACCCTC  
ACAGGAATGAAAATATAAGT  
GTAACAATGAGGGTATAAATGTCCAAATACAATTAATTTGAGTGTACCAATCACTTTTGA  
GAGTGTACAAATCATCTCCC  
TTTTTATATATATGAAAACATCTTCTAATTTCTGGTTACCTAACGAGAAACAATCATATTC  
ATACATTTGAGATGTATCG  
AGTTGAATTAGATGCCTATTTATTTATTTAGAGGCATTGCAAATAGTTTCGAAAGTGATT  
TTTAAGTGAAAACGATGCAC  
ATTAATACTAGCAGCATATTTGACGCGCACATATGACAAAAGATATATACATCGCCTAAC  
TTGATGAAATACATCTAATT  
TATGTATGAGCATATAATTTTGAGCTAGAAAATATAAGATGCATCAAAATGATTAGGGAT  
GAATTTAATTCATGTTGATA  
TATCGCTAATTTATAGTTATAGTTATTTCTCATTATTCTCATTTTAAGATTTGTCCCCGTTT  
GAACCGAACATACCTAAT  
GTAATGTGGCCCTAATAAAAGTATGTAGATTACCATTTTAATAACTATAATGGCAGATATT  
GTTCTTAAGTATATGGAAG  
TAATAGTTTAAGCTATTTTATCGTTGAAGGGTTGTCTTTGGTTTGCTTAAATAAACACCA  
TCAACTTATACGAAGGAAGT  
AATCTACTATTTTCATGGGTGTCCACTAATTCCTCATACATTCCTCCCCTCCTTATTTT  
CCTCCTTACCTCAAATTTT  
CTCTATAAACTCTTCTCACCATCTTCCCAAATCAATGTGACTCGAATCTTAACAGACTCA  
TTATCGTTTCTTCGTATCCT  
CTTCGTTAGCCCCTCTCCTTACCTGCCCCGTTTCACTACCCCTCTTCCATGGATCTCTCTG  
AGATCCATCACTTTTTTCAA  
>CsCML77  
TTTCTCAGTTTTTATATTTTGATCGCAGATGTGTCACAAGCATGGTGTTATGCATCGTGA  
TCTTAAACCTGAGAACTTCT  
TGTTTGCAAACAAGAAAGAAACCGCAGCCTTGAAGGCAATTGATTTTGGGTATCTGT  
TTTCTTCAAACCAGGTGCAAAC  
TTTGAACATGACCTATTTATATTTGCTCTATAAAACATTGATATGGCCTTATAACTATATTT  
GTTTGCCTAAATGAAAG  
TCTTTGTAATCTTCTACAGGTGAAAGATTTAATGAAATTGTAGGGAGTCCATACTACATG  
GCTCCTGAAGTTCTGAAACG  
GGACTATGGTCCTGAGGTGGATGTATGGAGTGCTGGAGTAATCTTATACATTTTGCTTTG  
TGGTGTCCCACCTTTTTGGG  
CAGGTCAGAACAACCATAAATCTTTAACTTCTTTTACAAAATGATAAAGTCTATACAATT  
TATGTACAAGGGAACAGCTC  
TAACTGTTTAAAAGGTCATCATAGTGCCCCTGAATTGCCTTTTTATAGTTCTTTATCAA  
CTTCTTTTTCTTTCTTTTT  
TTTTTCTTTTTTTTTTTATCATATTAAATATTATAGTAGTAATTTTTCTGTATGAATCTCAAA  
AAAGGGGAAAAATGCATA  
CTGAAGTGGTCAACCAACTTGACGGGTACCTGTACCATCCATTTTGCCTCCTATTATA  
AAAGTTTACCACTTAGGACA

TGTAACTGTTCCAAACATGGGGTGGATGTAATAAGATCAGAGCAACCTTATCACAACA  
TGATTTTAACATGCATAGCTA  
ATCAATACCCGTTGTCTTATGGTATGGAGTAATATGTAAACATATAACGTATTGCGATCAC  
ATGTTTATTGAGGTTTAAAG  
ATGATGTGCTTCTAAATATTTTGCCATCTTAATAACAGAACTGAACAAGGTGTTGCAC  
AGGCAATCATTGATCAGTTG  
TAGATTTTAAAGAGGGATCCTTGGCCCAAGGTATCTGATACTGCAAAGGACCTTGTC AAG  
AAGATGCTCAATCCAGACCCG  
AAGTTACGCCTAACTGCTCAGGAAGTTCTAGGTGCGATACAGATCATTATTTTTTTCTC  
ATCATATTCATCTTTTATGT  
TCAATATACTCCATTATAATGGGTTTTGTTCAAAATTTCTTAATCTGTTTGCTTTTCTTAA  
ATTCTTTCAGATCATCCAT  
GGATACAAAACGCCAAAAAAGCTTCAAATGTTTCGTTAGGTGAACTGTAAAGCAAG  
ACTCAAGCAATTTTCTGTCATG  
AACAAGCTTAAGAAGAGAGCTCTAAGAGTAAGAACATGCATTCGTTTTTGAGACAATG  
CATCATTTATTATAATATTGTA  
AAGCTTTTTCTGGTATATTGTTAATCTAAATTCTCTATATAACAACTTGCAGGTAATT  
GCCGAGCATTTATCTGCAG  
AGGAAGTGGCGGGCATAAGGCAAGGTTTTGACTTGATGGACACGAACAAGCGAGGGA  
AGATAAATATTGTTGAGTTGAAA  
GCCGGGTTGCAGAACTTGGGCATCAAATTGCTGATGCAGATCTTCAAATACTTATGGA  
AGCGGTAAGTTTCTAAAGTTG  
ACTTCCATGAATTTCTTGTTCGAAATGCATGAGATCAAATATATAATTTGTTTCAGATC  
ATGGAAGTTAAGCAAATGGC  
GTTAATTATCAATAGAGGTGGCAATTTTTACCCATTTACTTATGGATGGGTCGATGCAGT  
TCGTTTTTAATCACTAAAGG  
GTCAAACATGTCAAATAAATACGTTAGTTAACAAGAAAACGGATCAAAGTGGGTAAA  
GTCACCTAAAGTGATTTTAGT  
TCATTTTACCGTCTAAATCATATAGTAAAAAATTGAGATGATGTGTAACAACTACTGTAT  
ATAGATGTAGTAATGAAAGG  
TGTTACTACAGGGTGATGTTGACAAAGATGGATTCTTGAATTACGGAGAGTTTGTTGCA  
ATATCAGTTCACTTAAGAAAG

>CsCaM4

CCACTGATCGGGCAAGAGAGGTGAAGGAGGATGATTGGGTTTTTGCCTTGTCGCTCAA  
GCTGTGATCCAAATATGGGGT  
CGGTAAAGTTTGCTATAAAAGCAAACATACCCCATCCAACTCACGACTAATATACATC  
CTCACCTCATGCATTGTATGA  
CTTACTGATTATCCCTAGACTTAAAAAAGTAGTCGATCTACTTGTGAACTCAATCGGATT  
CTTTCATATTCGATTAGGGT  
TTATATCAAACCCTAAACCTTGCAATCTTTTCCAAGTGGTTTTATTGTTTGGTGTGTTGA  
TCTCTTAGCTCTATAGTTCC  
CTGTTGAATCGTATTAGCAACAAGTTTTGGGTTTTTCTGTGTTTCGCGTTTCTCGGACAA  
AGAATGTGGGATATCGGATCT  
CTTCATCCGATATCGGGTAGAAGAGAGAAACAACCGTTTGGTTGTTTTCTCTTTCTCGT

ACAGAAGGAGTTTTGAGCAGG  
AAGCAACTATTGACTTGGGTGGTTTTCTTGTTTGAATTATTCAAGTGTTGTCAATTGTTG  
ATTGGTTAATTACGTTCTCG  
ACTACATTTCTTTATCGAACATATATGTTATCGGGTTTGTGTATGATACTCATAGAGATAT  
CTAATTTAGATATTAGGGT  
TTCGTTTGGTTTTCTTGTTTCGTATACTTGAGTTCAATAAGCCACGCAAGGCTAGGTTTCT  
ATTTATCCCTTTTATTCATT  
AATGTTTATTATTACGTGTTTAACCTAATTGTGATTACTAGATCCATATCCGCTGCATACT  
CGTACATGTTAATGGTTAA  
CTTAGTACTAAAATCTCAACAATTTCTGCGCACCTCACGTTTCTGCCTTAGACGGGGTT  
GACAGTAGGTGCATTTCGTTTA  
CTTATTCGCCATATAACTATTTGGCCGAAGTTAAAAGTTTAAAAATCACATTTACCATT  
AATTTGTTGAATTATTTTA  
CTATTCACATTCTTCTAAGAGGGCGCGCTGCAGTAAAATATAGTCACGTTATAGGGCCAT  
TTTGGTGCGTATCCCGAAGC  
CATGATTGCCATGGCTGCGCCGCTTCTTTGTGTTATAGGGCATTCACTATGGTTACAACC  
AGGGACGGAGCTTCAACAAA  
TCTCTTGGGGGGGGCCGAAATCATGTGAAATTAAGCGTATAGTTTTATATATACACGAGA  
ACGTACATATTTTACAATTTT  
TAGCCAACTCTACTTATGTAATGGGATCAAATCAGTAAGCATTGCCTGTTATTCAATATG  
GTAGTTAGATTATAGATAGA  
TAATACAAAAAAAAGGCACTTTATCACTATAGATATTAAGAAATTATATCAAAGTAACAA  
TCGGATTAGTTAGATAAGAA  
TTGAAATATTAAGTAGATTTTGTTTTAAAAGGAATGCAAACCAATGGCTGAAAAAAG  
AACGTGGAGCAAGAAAATAAGA  
AGTGATTGTTTCTTTCTATTTTTGAGGGAGGGCTAGATGTAAATATATTCTTTAAATCCC  
ATATATATCGAACAAAACCT  
ACCATAACTACCCGATTTTTTTGGGGGGGCCATGACCCACCCCTGCCCTCATAAAGCTTC  
GTCCATGGTTACAACGGGAAT  
TATCGAGTTATCTTTTCTTTATTTTTTTTAGTGTAAGATAAATGAATATTGTGTCTCTCGT  
GTAATTATATATTAAGGAG  
GGGTTTTTTTTCTTTGTGTTACAAGAATGTTATACGCTGAAAGTTGACGAGATAATGGA  
CCAAAATAAACGATAAAATAA  
AAGCAAAATGAGGGTAAGGGTAGAACGGTGAAATCGGATTGATAAAAACAGATCACA  
TCCGTCAGGATTGGACCACCACT  
CACTAATATTTAATTGCAATCGCTTGATTTAACGCGACCCACGATTTTCATTCCTAAA  
ATAATATCCATCCATTATTC  
ATTTTCCCAAAATACAACCCTTTTTTTCTTCCATTTGCTCTCGTAATTTGTTTTTTGAAA  
ACCAAAAAAAGAAAAGAAA  
>CsCML78  
ACATTATCTGACATTAGTCTGGCGTAATACATTTTGTCTCATATTTTCATACGCTTTTTTTTG  
TAAATCTAATTTAGATAAT  
ACTTCCTAGGCTATGTTTTAGTCTTAATTTTGGCGTGGCAAAAACCGCGAACCATAAAA  
TGCAACTTTGATTTGTACATG

GCTTGGTATATGAGCCGAACCGCAAATATTCTTGGTACAATTCTTAACACACTACTCTCT  
TTTGTATTAAGCCCATACAA  
AAAATGTCACCTGGCCATAATAATGTCCACGCGAGGGATGTTGAAGAAAGCGATACAA  
ATTTTTTGTGTGCGTTTGAATG  
AGGGTTTTCGTTATGAGGCCAACAGATTTGTTGAGGTATGTTATTTATTGGTTTTGTCTA  
ATTTTAATGCTTCTGCTAAT  
AGTTTAAAGCATAACACATTAGTCTAGGGTGTACAGTTTTCCAAAATTCATGATCTGT  
TTCGTAAATCTACTTTAGAT  
AATAGTTGCTCTGCTAGAAGATTTGGGTACCCGGTGTATCTTAATTTTGGCATGACAAA  
AAGCACGAAGGCATAAAATGC  
AATTATTTTTTTGTAGCCAATACACTTTATGAGCCAAGGCATAAATATTATGTCTCCAATC  
ACTAAAGCATTTTTTCATTT  
TTCTATTTAGATTATCTAGGATCCGTCAAATGGACATATTAATGTTGAAGTAAGGGGAGT  
GGAAGAATTCGATATAAGTG  
TTCTTTATAATGCTTGCGTGGAGAAATTGGTTCATGAGTAACTCCTTATCCGAGCTTCTT  
CATGACAAAACATCTCCTTG  
CATGCTTACTAGAAGATTTTTATATCGATTTCTTACATACTCCCTATATCAATGTTAGTATG  
CCCCATTTTACATATTGT  
GCAAACCTCTAAATAGAAGGTAAACAATGTCTTAGGTGACACGTTTGTTGAGTCGAGCA  
ACCTTATTACGCCAGGATCACA  
TACAAGATCTATTTGACTTTGAGTTGTTGGAAGTTGGAACATCTAGCAGACAATTGTGT  
ATTGAGAAATAGATAGCCCTA  
AAGATCTTCCTGGTAAACATGGTGTCTAAATTTATATGTTTTTGCATATTTTTTACAGTTT  
CATATGTACTAATTTGTAT  
ATCGTAGAACCAAAAATATAATGCATTCTATCTATGATTTTGTAGGTGTAGTAATGTTTCA  
CACTTTCTGATAAACGGCG  
ATTTTCAAGACAATTTATATGAGACACAGAATCAGTGGCAATCGAACTATTCAGGTTAC  
TTTCTATGCAGTTATTCCAAA  
TAGTACTAAAAATAAATCAGCAGGAGCTGGAGCCATGAAGAAATGAAAACGGTTCTGT  
GTGACTTTTATATGTATCTTGCA  
TACAAAAACTAAAACCAATGAAAATTGAAATCAATTTTGTATAATTTTATGTGTAAATAG  
TTGTTTTCTCTTCTGCTTTT  
TTATTATCAAAAAGTCTCTTCTTCTATAATAGTATCGTATACAAACACTTCTTTACAACGC  
ACGAGTTGTAATCCTTATT  
TATAACAATAAGTAAAGTACGATCTCAATTTAGTTTTTCATTGTGACACTAATATGACAAT  
GATTCTCTATATATAATTCT  
CATCACCACATCTAAAAATGCACATCTAATAAACTCCAAGGTCCAAAACCTTACTTCAAC  
AAATAACCAAAGGACACCACT  
TTTAATTTCTGAAATGGCTAAACAAAAAATCCGTATGAAAGAAAGAAACAAAACAAC  
TAGCCGCATGAGTCACATCAA  
ATAATCAAAAGAAAACAAACAACCAATCAATTAACCTTAAACAAAAGTCATTAA  
TATTCCATCATAACGAAGCTTC  
CACGAAGCTCACTCTCACTCTCCCTTTTATTACCTCCTCCTCCTCCTCCTCCTCCCCAC  
ACCTAAACACACACTACTTT

TCACACACACACATTTCTAAACACGCACTGAACACACGCTTTTTTCACACACTAAACAC  
ACACTTCTTTTCACACACAGATA  
>CsCML79  
AAAAAAGCATGTGTGATTTACAACCTTTTTAAATTAAAATAGAATCACATGTGTTTTAGTT  
TACAACAATAAAAGTAAATC  
ACACGGATTTACATTTGTAACTCGTTGCAAACAGTTGTGTATACATTTGTAACTTAAG  
CTAATTATTGTTTTTTCCCA  
ACATAAACAGTATTTTTTTTACATCAAATCACATGCGATTTTACCTCAAATCACATGTGA  
TTTACCGCAAATCACATGTG  
ATTTACCGCAAATCACAGTGATTTTACATTAAATTATTTTTTAAAGTGAATCACATGTGA  
TTTACACATTTTTTAAATTAA  
AAATGAATCACACATAATTTACATTTTTTTCATAGCAGAGCAAAAAATAAATAACAGAA  
TCACACGTGATTTTCAGGAATT  
TGTTTTATAAAATGAAGGAATAAGTTGATTTGAAATTAAAGATCACATGTGATTAATTAC  
TTTAAATATCGAATGTGACT  
TGTAATCCCATGTGATTCTCTGGTGGATCACATGTGATTCTTTTTGGATCACTTGCGA  
TTTTAAAAATAACAAATCAC  
ATGTGATTTTTTTTTTACGGATCACATGTGATTTGTCTGGACGGAAATTTTGAATAAAAAC  
TTCATAGAAAGTATATAAAA  
GTGCATATCTATAGAAAGATGATTTTTTCTCGTCGCAATGGTGTATTTTTGTAGCTTGA  
AGATTTACCGTTTGCAAGA  
TATGTTGTTTTTTAAAAAAGGTGGAAAGTGGGTTTTCATAGAATTACATTTCTACCCCT  
CATTTGTAAATTTTGCTTT  
CATCTCATCCATTGGATGAAAAGAAGATGGATGGTTGAGATCTTATGATTTGATCTTTAG  
ATTAGATTTGTTTTCTATTG  
ATCTCACCTCATATGTAAATAGGATGTATTAGAGAGTCAATTTCTTTTGGCTTTTCTTTGG  
GGTTGTATTATAGATTTAT  
AGTATAACCATTTGTTTGAACTTTCAAAAGACATTAAAGTGATTTTTTTGTCAAAATA  
GTTGAAAGTCTATGAAATTAG  
GTAATACAAAGAGGTGAATAGTATAATTTATTTGCTCCAGTTTTGATGAAATTGGTGTAA  
AGCTCATGGCTAATAAAATA  
CTTATTCAACCCTAAATAACGAGATAATCAAATCAAACCTATTCACTCCAACAATAAA  
AAACTAGTTATTTGACTTAA  
ATCATAATAATAGGATTTTGATAGTGATTCAAATAATTCCAAATCCAAAAAGCGATGATA  
TTAAAACCTGTTAATCAGCT  
TGGCCCAAATCCTTATTATGTATTAATTGAGTGAATCATTAATACTACACTTTCTTATAT  
AAAAGGCTAATTAAGACAG  
TCATATGTAACCACTTAATTTAGTAAACACCCCAATGTAATAGGAAGGTCACCCACGCA  
TTGTGACTTAAATGCGTCTTC  
ACTAAAACCTTTGCTACGCACCCACGCGTGGTTTGATCGAAAAATAGGAGAAGTCGGTC  
GATAAACCAATCGACTTGTGAA  
TGGTGTGTTGTGTGTGAATTTAATTTTTATGAGGTATATTTGTGTATAAATGAGATTGTTT  
AGATGGCCATGTTGATGGT  
CTTATTACACCTTGCGGTGATGATATTCGTAGTGTAGTGAAAACGTGATGTAACGCTGA



GTTGACATTGATGATGTTGAT  
TACTACTAGACCAAGTCTAATCTTAACACCCTGTTTTACGTTATAATTTGCATGGTTTTGT  
TTGACTTAATATGAAAACG  
AATAGTCCCTCTTCCGGCAGTTTTGGAGACCACGGACTTGGTCAATAAACCAACAAAA  
AAATATCAAAATCAAGTGAATG  
TGCCGGCAATTTCCCTTCCCTACAACCTGGCTTACTATTATTGGGAACTGCGATGAGCACC  
CATACTTTTCATACCATATATA  
CTATACCAATCCTATCACTCTATCAACTAGTAACATAGACTCGATACTATAATGTACATGG  
TGTACGAATACACTTCTCA  
>CsCML80  
CACATGTAATTAAACAGTAATTTGAATATCACATGTAAATTAGTGCTAAATCACATATG  
ATGTGTAATATCACATGTGA  
TATTAGTGTTAGATCAAATATGATATACATATCATATGTGATTAAACATATCACATATAATAT  
GTAATCACATGTGATAT  
TAGTGTTAAATCACAAATGATCATATGTGATTAAACACTAATATCATATGTGATATTCAA  
TTAGTGTTTAGTCACATGT  
GATTTTTTTCATGTAAATTTTCAGTAACGAAAAAAAAATGTAGAAGAAATGAAAAACACG  
AAAAAAAAATTTTGTCTGATAGTA  
TATCAAAGTGCCTATCTACAGAAAGATAATTAAATGCTTGTCGTAATGGTATATTTTTTTT  
GGTTTAACGATTAACGGTT  
TGAAAGATATTAATATTTGAAAAAAAAAAGGATGAAAGTGGTTTTTTTAAATTGTTTTGA  
TTAATCTCATCAATTAAATCA  
AATAAAATGGAGAGAAGATAGAGGTGGAGATTGGTCCCTAAATAAGTAAAAAATGTT  
TTGTCTTCAAATGATCTTAAAT  
AGCAAATTTATCATGTTCTTTTAGGAAATACAAAACCTTTAAAATTTAAAACACTTAATTA  
TCATATATTTTTTTTAAACAA  
CAATTTTTTTCACACCCTATATCAAATATCTCAAGTATATCTTACAAATGTTTCTAGTTAAG  
CTTAAATTCACAACCTTTTA  
AATTGATGGACAACCTCACATATCACTAAACTAAACGTTAGTATCTCTTAGTCGCGATAG  
GTCATTCAGATACCTTGCACA  
TAAACGTTTTTAAACCACATATCTAAACACTAAACACCTTAATATTAACAGTGTGTTCTAA  
AAATTAAAAAAAAAAAAAGA  
AAAAAGAAAAAAAAAATGGTTGTCTTTCATCCCAAAGTGGGGTGAAAGTTTTGAAAG  
CAAAATCTTCTCACTTTCACCTT  
TCTTTCTAAAAAAGAGAACACAACCTTTTATTACTTTTTGTTCCTTCCCCCCCCCCCCCCCC  
CCCCCCCCCTTACTCAACGT  
GAGAACACACTGTAAGTGTAAATATGTCCAACCTGTAACAACGGACTACCACCCCACCAT  
CATCGTCGTTACCCCTCCTTT  
TGTGAGAAATCGGTGGTGCAGACCACCACGTCGTAGAAGCACAAAATATTACTTGTGT  
GTGGGAGAGAGTATATTGTGAG  
GTATATTTGTGTTTAAAGTGGATATATTTTGGTGATTAAGCTGGTAGTCTTGTTACACCTGT  
TTGGTGTTGAACTCAGTAA  
TGAAGAGAAAGAAAAAATGGTTTGGCATTAGGTTGACAATGGTTAATTCGATGTTGAA  
TATAACGTTTAACTATTTAAAG

CACCTGCGTAGTGTTTGGTATGTTGTAATGAAAGCCGGAATGAAAAAGATTATTACGAT  
GTAATGAAAAAATGTTGTT  
TGTTTACATTTATAGAATGAAATGATTAATTACAAGGAATGACCCATTACACCAAAACCA  
TTTCTTTGAGGTCCCCAACT  
TTTTCTATTACATCTTATAATGGAATCAAAATTACATAATTTTTCTATTACATCTTATAATG  
GAATCGAAATTACATAAA  
ACTCCATCATTAATAACCACATTAAATAAATTCCCTATCATCAATGGGTATTTTAGTCTT  
TTTTATTATCGATTTATTA  
CGTCTTATCATACAAACCAAACAAGATTAATAACGACAATAAATCATTACATTACACTAT  
TTATTCATTACATCATTTAT  
TTTATTCATTTAATATTTTATTCCGTCCTACCAAACGAACCTATGATTTATTCTAGTTCCAT  
GCAAATTCACCATAAGT  
TTGGAATAGAACTTATGTTCAAAAAATTTACCTTCCCTAGCCCCCAACCCTATTGAC  
AAGTTGTATATTGTCATCCAT  
ATTCACATACTTCTCATATTGCTATAAATAAGTGCATTAATTCTTCCAATTCCAACCCAC  
CACCAAGAAAAGAAAACAA  
>CsCML81  
CAATGTCCTGGGTCAAGGAGAATCGTCGAATACGCTTAAGTAAGGTGACTGCATCTTTC  
TCAAGTTCTCCAAAAGAAGAA  
AAGGAGAATGGAAGAAACCCATATCCAATATCCGCACATTTAGCATCGTATTTGACCCG  
TTTACGCTGCGCAGCATCACT  
GATCGCTCGCCCTGGTATAAAATCAATCAAACCGGATTGCGTCAAAGGCGACGAACCC  
GTAAGATCAACACATACGTCGC  
GTCCACTATCCCAAGAGTAGAGTAATATGTCATCCGGACGCAAGGATCTGTCCCCATCT  
CCAAAAGCCCAATATCCACC  
TCCTTACGAGCAGAAATCCCTGACCGAGAGCATATATCAACAAGAACATCGCGTACAA  
GGTTGTGACGATGTTTAATGCC  
AACAATACCCGCACATGAAACAGCGTGGTCCCCGTAAATATCTCCAGGAAAAACCTTA  
GAGTAGGCAGAACACGGTACCT  
GAACAGTGAAAAGAGGAACGCCCAAACGATAACACAATACACATCGATAAGCCCTAG  
CGTTCATAGTTTGCCCCAATCCA  
GATATCGGAGCCACCCTAAGCCAATCCGAGGTGTGATCCTCCTTTAAAGAGCTCCATAA  
CGCCATCTGTCTGGGAGGAAAAG  
ATGGAAAGTAGACTCAACAGATTGGGTAAACCCGATCGAAATATATGTCTGCCAATTTCT  
TCATAAGTTTGGGGGCAGCGA  
CCTCGCTAGGGTTACTCAAAAGGTCAATATCCATATTCACATTAAGGCACGTAGGGCA  
TCATCAAAGGAGGGACCAGCA  
GTTACAATACCCGAACCTAAGGAGAAGCTTAGACTGTAAACTAGCAGATTGATTATTATT  
ATTATTATTATTATTATTATT  
TAATTATTTGAAATACAAAAATTGATAGGTTGATATCAAATCTTCATATCAACGTTTGTTT  
TTTAACCTTTTCTTATAAA  
GCCAGTAACTCAAATGCTAATATCAATTCCTTTTATTTATTTTATTATTATTATTATT  
TTTTTATTGTTTGGGGT  
TCTTTAAAATTCTCCACAACCTATTATATATAAATAATATTAGAAATTAATTTCAATTGTGCA

CATTATTACGAATTGCAC  
CCAACAAAAGATCTTCCAATATTGCTTTTGGCATAGAAGGTTAGCATATACTCAGTGTAT  
TTAAGGTAGCAATTTAAATA  
ATCATATTATTTTAATGATGATTAGGTAATCAAATGTTTAAAACGAAAATTTAAATGATA  
AAATTCATTTTATTCATG  
TATTATATACAATAACCAAACAAGAGAATGCTCTATATCACACGCATTATTTATTTGTACC  
AAACAGTAGAATCGTTATT  
CTTTCTCAAACATGATTCACTTTTTCTGCAATTCCATTCTCTATTACGATTTCACTCTATG  
GCATTTTCTCGTACCAAAC  
GTGCCCTTAGTAGACTCAACCATTAACTAATTGACAAAATTTGACCGGACACGTAAG  
AAAACAAAAGAAATAACAAATT  
TAAAAATTAAGTAGAAAGTATTTTTACCGTTAAAATAAAGTTTAGCAGGTGAAGAAAA  
ATAACAAAATTTCGAATACCG  
AATTTCTAATATCGAAACGAATTCAAATGTTTTGCTAGCATTAATCTTATCTTTTTTTCCC  
TGTTATGGAACAATCTAGA  
AATTAATTGTATATTCAATACGCGGGGGACCAACATATCAAGTTGGCAACACCTCTTAA  
CTTTTTCTTGCCAAACGTCAC  
GTTTTCTTCCCTCCACATTATTACTATTAAAAATATCAAAGCTTCCTAGAAACCACAATA  
CGCGAATTATCTGCTGTACC  
CATCCTTCTGTCTCCCCGATGGCTTTTACTTCATCTTCCAGGAAAATACCCTTTCTCACC  
CACCTTCCCTATATTTATATA  
CTTTGATCACTTCATTTCCAGTATCATACAACTCAAATACCCTACAAACGCAAATTATA  
ATACTAGCTAGCTAACATCA  
>CsCML82  
AAAAGGAAATTAATTATTTAGAACTTAATTTAAAACATTGACATTAAAACGACATATATG  
GAAATTAAAACTAAAGACTA  
CTCTTCTCGCTTGCTTCTTCTTCTTATTATATACATCAAAGGCATCCCACTTGATTTCTG  
AGCCAATCCCACTTGTTAT  
CACAGCCATTGGATCAGTTGGGTCATTTTTGGCCATTGATGATATTTGGCGGGAAAATG  
GGATATCAACAGGTGGAAGGA  
TTGAGTGCAAGGGGGGGAGCATTTAATGTTTCTTGGCTTGGGGTGTTTGGAGGGTAGG  
AATAAGGTGGGTGTGATGATGA  
TGGAGTAGGGGGAAGAGTTGCAGGTGTTGCAGGCAAGTGGTGAGGGAGAAGATAAGT  
TGGAGGGAAAAGTGGGCGGTGGG  
GTTTGACTTATTTGACTTGGGGGGGGGGGGGGGGGGTTTAATATTAAGGCAGGGGTC  
AGAGTGTATGGCAGGGGTCAAA  
GGGATATTGGCAGGGGGTTCAAAAAGGTCCAAAGGGTCATGGCTTGTATTAAATAACA  
AGGACCAATATGCAATTTCTGA  
AATTTGGAGGACCAAAGCTGCCAATTTCTCAAAGTTGTTTCAAGGGTTACTTTTGCCA  
AGTTTCAATAGTATAAGGACCA  
TAAAAGATATTTTCAAACCTCCAAGGACTATTTTTGCCAATTTTGAACTTGAAGGACC  
AACTTGTAATTCTCAAAAC  
TTTTGATATTTTTACCAAAGGACTAATTATGACAACTTATGATTTAAAAGGACCTTTG  
GTGATTTTTCTTTAAATTA

AGTGCTCAGGGACTATTTCTGACAACTTTTGAAACTTGGGAGACTGAAACTGCCAATT  
ATGCAAACCTTAGCTCATTTTTTC  
ATCTGATTTTAAACATTTTGCATCTGAAACATATAAAATGCAATTTTGAGATATTTTCAGT  
ATTTTGATGCATTTCTGAG  
CATTTTTAAATGTTTTGCAGTTCAGATTTAACAAAAAATGATGAGTATTACACACTCAT  
CAAATACTCTCATCCTTTTT  
TTAAAAAAAATTAATATATCACAAACCGTTAATCGTTATGCAAATGAACTATAACCACCGC  
GACGGGAATTAATCATCTT  
TCTATGGACGGACACTTCGATATATTTTCGACAATTTTATTTTTTATTTTTTTCAGTTAC  
GTCTGGAAAAATCACATCT  
GATTTGTATCACAAATCAAATGTGGTTTATGAAATCACGTGTGATTTGTGATACAAATCA  
TATGTGTTTTTTCCAGACAT  
ATCTGAAAAAAAAAAAAAAAAAAAAAAAAAAAAAAAAAGTTCGTCGAAAATTTAT  
CGAAGTCTTCGTTTATAGAAAGAT  
GATTTAATTTCCGTCGCGATAGCGTATTTTTTGTCAATTTGACGATTTACCTTTTGAAAGAT  
ATTTTATTTTTGAAAAAGA  
AGTGGAAGTGGGTGGTGTTTTTTTTTTTTTTTTTTTTTTTTAAATGAAAATATGAGT  
GACTAAAATTAGTCTATTGA  
ATCTTTAGATAATTTTAATTTTACATTGATGTCAACTCTATCATTAGATATTTAGATGGTAC  
TATGAGAAAATAAACTCA  
AACTATGGCTATCACCATGCATAAAACACAACAAAGTTGATAACATGTTCCATGAAAT  
ATTGCGGTATATTTTATGTAA  
AACCATATCTAGGAGTTACATGTAAATGTTACATGTCATTTGTAATGACAGTTACCGTAA  
TAAATTCATATCCATTGGAT  
CCAGATTCTGCCAGCAATAAATTCAATTATTGTCTCATAATTTTCAAGATCTCGATCTCTA  
TTCACCATTAATTCAACCT  
TCCTAAACTTAGTATAAACCTACATAATAAATCTAAATTCATCTCTTATAAACACATTTTC  
CCTCAATTCAAATTCAATC  
TTTTCAAATACAGCAACATTTTCGAAAAGATTGAATTTAGTTTCGAGGGAAATATATATGA  
TGGAACCAATGTTAATTCA
