# Supplementary material for: Genome-Wide Identification and Expression Analysis of CsCaM/CML Gene Family in Response to Low-Temperature and Salt Stresses in Chrysanthemum seticuspe
Source: MDPI journal article supplement (doi:10.3390/plants11131760), 2022-07-01
Supplement: s1 [file s1]

>CsCML1

ATGATGAGTGAATCCAATGATTCTTCGGTACATGCATGTTTTCTTTTACCATGTTTTCAT  
GTTTGTTTTTTTAATAATG  
TTTTTGTGTTTGAACATGTTTTTTGTTGTGTTTAATGATGATGAACAGAGATGGAGT  
ACATTAACATTGGAAGAAAA  
AGTGTGTGGTGCATTAGTCCCATTATTGGCTTTTGCTGAGATTATTTTGTGTGCTTTTTCT  
GGCTGCTTTGATTTTGGTG  
GTGCTAAGAAGCAAAATAAGCACAAGCTGCTTCCTTTTGATCATCATCAGCTTACAAG  
ACTTGCTTCTGGATCTAATTGT  
AAGATTGCATCACTAGTATTTGCTTATTTGTTTATATGTTTTGAATAAGCACTTTTTGAGA  
TCATATGTTTAGAGTTATA  
ACCTGTTTTCTGCTTGTTTGTTAAATAAGCACTTTTTGAAACCTAATGTTTAGAATAAGC  
TGTTTTCTGCTTATTTGTCA  
AATGTTTGGTGTTTTTTGAATAAGCACTTTTTGAAATGAAATGTTTLAGAATTATAACCT  
GTTTTTTGCTTATTTGTTG  
AATGTTGGGTGTTTAGAATAAGCACTTTTGAGGGTTTAGCTGTTTGAATAAGCTATTTG  
GAACTGATGTTCTTAAGAT  
TGAATTTTGAAATTGGTGTTGAATAAGCACTTTTTGAAATCAGATGTTTAGAATTATAA  
CCTGTTTTTTGCTTATTTGT  
TGAATGTTGGGTGTTTAGAATAAGCACTTTTGAGGGTTTAGCTGTTTGAATAAGCAGT  
TTGGAAAGGTTAATTGCCTGA  
AAATGTATCTAACTTACCATTTTTTATGGTTCGGTTTAGTGGAATTTTTTTTTTCCAAGTA  
AATAAAAACTTTTGAATT  
CGTGCTTTTCTGTGTATTTAGCTCGTGGAATGACCGTTTTACCTCTCGGTATCAATAT  
ATTTACCGAGAGGTAAAATG  
GTCATAGGATTGCACAGAAAAGTACAAATTCAAAAGTTTTTTATTTAATTGGAAAAAAA  
AAAGTCTACTACACGGAATA  
TACAAAATGGTGAGTTAGATACTTTTCAGCCAATTAACCCATTTGGAAATTGGTGTTCTT  
AAGATTTAATTTTGGAAATG  
GAATACGAAACGGGTAAAGGGATGAGGTTCTTCATTTTCAGGTTACCCGAGGCGGGTG  
AGTCTTTGAGTTAGATGTACCC  
GGCCTACCCGAGGAATACTCGTGACCCTATGTCAGGCTATTATGTTTTGATAAAGTAGAT  
TTGAGTAGTTTTGGATTTCG  
ATTATTTCAATGGTTAGTGTGATAAGCTGTTTTGAATAAAGGACTTGAACTCGTTATTC  
TAAACATTTGATTTCAAAGA  
AGAATAACAATGAGCATATAGAAAAATTGTGATAAGCAATTCTAAACACCTAGATAAG  
AGGGTGTTTGGGATTGTATAT  
TTAAGTGCTTGTTGCGTTTTAAAGAAAGAAAAAGCACTTTCGAGCGGAAGTGTTTAGA  
CTTTGGATTTCCCTTATGCTTAT  
TGGCTTATTTGCTTATAATTTGGTGAAATAAGCAGTTTAAAATTAGCACATGTGTAGATG  
ACTATATTAAATTGCTTATA  
CTCCGTAATACATAAGCATAAGCTAAATGTACGCAATCCCAAACACCCCCTAAAAGCTA  
TAGTTTGACTTAACAGTTTCA  
GTAAGCAACTCCGACAAGTATATTTAAACTACTTATTTACCCCTCATATAAGCAGATCA

TCACAGATGTTAGTTTTTGC  
AGTTAATGTAAATGAAGTTGAGGCGCTTTTCGAACTGTTTAAGAGCCTGAGTTCGTCTA  
TCATCGACGATGGATTGATAC  
ACAAGGTATATTTTTGAGTTCTCATTAAAGTCTGCCATATTACATTGTATATAGTAATTTA  
GCTAGTAAGAGCTTTTGC  
ATAAGTTGTTATTATCTTTTCTGAAGGAGGAGCTTCGATTAGCACTATTCAATACCCCTC  
AGGGTGAAAATCTGTTTTTG  
GATCGGGTAAGAACTGAAATTTAATCTGCATTGTGTTATTTGAATATTTTCGGTTAAATC  
CTATATTTTACCATTCCCTA  
TAGAAATGCTCTTTTGTATGTAGGTTTTTGATCTTTTTGACGAGAAGAGAAATGGTGT  
AATTGAATTCGAGGAATTTGT  
CCATGCTCTCAGTATCTTCCATCCGTATGCACCTATAGAAGATAAAATAAACTGTAAGAT  
GTAAAAGCTATCTTTCCGTA  
CACAGTTAAATTGTATCTCATGAAAAACGTACCCTGATGACTTCTATCCTTTTTTCCTC  
CTGCAGTTGCTTTTAGGCTC  
TATGATCTAAGACAAACGGGGTATATAGAGCGAGAAGAAGTGAGTATGCTGTAATATTA  
GTAAAGTTAACAGATTTGAGT  
AAATGTAGCAATTTTTGACCCGTTTACTTATGAATGGGTCAATTTGTGTTACGTTATATTT  
CAAAAACGTAAAAAGTTAG  
TCAAACGGGTTGAAAGTAGCCCAAAGCATAAATTAAGGCATGCAACCCATTAAATAAG  
TATATTAATAGCGATACATACC  
TTTGGACAAAAAGTGTTATGGTAACCTGACCCAACGCGTTTCAACCCGTACAAATAATT  
ACCCTTAACCTGTTTGACCGT  
ACATTATTGACTCATTTTGCACCTTCATTTTAAATAGGTCAAACAGATGCTAATAGCAATA  
TTAACAGAATCCGAGATGAA  
CTTATCAGATGACCTTCTTGACGTTATTATTGACAAAGTAAGATCTCTGCAAACCTGGTTT  
GGTTTTTCCAAATCTTTAAC  
AGTAGTAATTAATAGAGGGACGATGCTTGTTGCAGACATTTGCTGATGCGGACACTGAT  
GGAGATGGTAAAATCTGTAAA  
GAGGAATGGAAAGAGTTTGCACCTCAGATACCCGAGTCTTTTAAAGAACATGACTCTTC  
CTTATCTAGCGTATGTCACTCT  
ACTTCTTTTGAAATTATAACAAGTTACTAGTTACAAAATTTTCAAACGAAAACGGGCT  
AAAATGTTTTTTGATACAACC  
CATCCGTCTGATCCATAATTCCTCGGCCCTCTTTGCTACAAATTACATTGATTAGTTAA  
CTGAACTTGTCGTTAATATT  
TTGATGAAAATTCAGGGACATCACAACAGCATTTCCAAGTTTTGTTTTTCACACGTCGG  
TGGAGGATGCAACATGA

>CsCML2

ATGGGCTGCTTTCATTCTACTGTAAAAAAACCGGTTCTGGGCATGAAAATCCGACTTT  
ACTTGCTTCTCAAACAGCCTG  
TAAGTTAATCATTGTTGCAATGTTTTATCCAACATGATTGGTACATGTTGCTTATGTTGGT  
CTTTTTTTATGCTCTTATG  
TCTCTCCAGTTAGTGTAAGTTGAAGCTCTATTTGAGCTATTCAAGAGCATAAGT  
AGTTCTGTAATCGATGATGGG

TTGATTAATAAGGTAATCAATTTGTTTGTTGATGTTAAGTTATCCTCAATGTCTAGAAAC  
AAATTATGCGTGTTTATCTG  
TTTGGTAGTTAGGAAATTTCTGTCCGTTGCAACATTTATTGTTTAATGAATCAAACCTCTC  
TTTAAGAACTTGGTGATTG  
TGGGTCACAAGTTTCTAATGTTCTCTTCGCTAAAGGGAAATTTAATTTTTTACCTGAACT  
ATGTATCGGCTCAATTATTG  
TGTCTTTCATAAAACACGAGTATTAATTGTCTCCTTGCACTTCATTTTTTTCTTCGTTTAT  
CATTGGTTTTATTATATTG  
GTATCAGATCCAGTTATGATATCTGTGATTGCCTTGGATGTATCCCTGATTTTCTCTTGAA  
CAGGAAGAGTTCCAAC TAG  
CATTATTCAAGAACAGAAAGAAAGAGAATCTCTTTGCAAACAGGGTATGATGCTTCTT  
CAGTTTATTTTAAGTCACGTAA  
AGTTCGTTCTCTTTGTATTTTTCTTTTGGGCATTGTCAGTATGTAGCTAATCTGAAAGAT  
TGATTGTGTTATGTTGAAA  
TTTACTCTGCTGGTCTTGGACTACAAGAAATTGATTTTAGCAAATTTTGTATTGAGAA  
ATTTTCATGATAAGTATCAC  
TAGTCGGCAGTTTGGTTAGAATGATGGTTGGAACCTGCATGTTAATTTATTATACTTGTC  
GCTAGTATTTATTTTACTTG  
TGACATGTCACGTACACCTTCTTTTCTTTTAGGAGTTTGCTACATTAAATATGCATATATT  
GATAAGAATAATTAGGTAA  
GAACCTGTAGGAGCCTAATAGGGTATAACATATCTGGTAAACTATAAGATTTAGTATTAA  
ACCCTAATAATTATTGAGAT  
TGTAACCTGCATCTCAATCATATTTTCATCATTTGAAGTTACCTTTTCAAGAAGGTGAGTG  
ATGTAACCTGATCGGGTTGCG  
CACATATAGCTTTGCGACTTTAAAAAAAAGGCACGTCAATAATTGAATGAGTGTGC  
GTCTTTGTGCTTTAGGAGTATC  
ATTTTGTAATGAACTAGTAATAACTCTGTAACATAATATATGTTAAGATTTAAGAATATAC  
TAATACTTTCAGATATGGC  
TATGACTGATCTTTACATTAACACTTCAGATTCGATACTGGTCCAGGCATATATATACACT  
TTCTGAAATTATTTTACTA  
CCTTTGTTGCAGTTTAAACTACATAAGCTGCTTCATTTTGGAGTTCATACTTTAATAATT  
CAGTTTTTTGCATTTTGGG  
GATTACATATCCATGTTATTTTCAGAGCAAGTGCATGTGAACCATGACTCATTGTATCTCC  
TCACCATTCAATTCAAACCC  
AACAGATGAAAATGATCTACAACATAAAATTTGTTAATATTTTCATCTATTCCCTTTTCTG  
GCACATAATCATAAATTTA  
TAATAACTTAAATACCTTACATCTCATGAAGTTAGCCTTTTTTTTAGTGCTCACATAATAA  
CTAAAACGCCCTACCTTTT  
TCATCATATACCGTTTTTATACATAATCTTCACATAAATGAATTTGAGCACCTAATCTTAG  
ATTTTGTTGAAACAGACCA  
TCTGATATCATTAAGGAGTTTAGGTGCTAAAAATGCTGTGCAAGGCGCGGAAATGATAA  
ATGCACTCGTATTAGATTCG  
GATTTGGTGTGCTGTTTTTATACTTCGTTACTGCTGTTTGCAATGCACTCGTATATGTGC  
ATTGATATGAAATGTCAATT

GCATGCATATTGGATAGAGTACAAGATACATTTTGAAAAACATTGGTATCCTATCTGTTA  
TACAGTTTTCTTAAGCTTGT  
AAGTTTCATATGCAGATATTTGATCTTTTCGACGTCAAGCAGAAGGGGGTTATTGATTTT  
GGTGA CTTTGT TAGAGCACT  
TAACGTTTTCCATCCTAATGCTCCTCAAGAAGACAAGATCAGTTGTAAGTTGATCATGA  
TGACCCAAACTGTAAATTTCA  
AGTGGCCATGAATGGTCTTGTAATACTCATTGTTTCGTGTTTCAGTTTGTTTCAAGCTTTA  
TGATATGGACGGAACAGGAT  
TCATAGAGCGCCAGGAGGTACATTTCTGCCATTTTAATGCTCTATGCTTTTCCATGTTTG  
TGTCCAAATATTATTACTAA  
AATATAATAAGAATTGTATTAACAAGCTCGTATAAAGGAAAATAACCAAGCCACCTGAA  
TATCGTTTTTCGTTTTCTAAA  
GCTATTATGGCACGTGTGTAATTATTTGTCATAAAGAAGTTTGAAATATTTACTAAAGAT  
AATAAGAATCGTATTAACAA  
GCTCCTTCATATAAAGGAAATAACCAAGCCCCTACATAAACATTGTGTTTTGTTTTCTAA  
AGCTATTATGGCACATGTGT  
AATTATTTGTCATAACATCTTCATTATGTGTTATCTTTTG TAGGTAAAGCAAATGTTAATC  
GCACTTTTATGTGAGTCGG  
AGCTAAAGCTAGCTGATGACACCATTGAGACAATACTTGATAAGGTGGGTCAATTTTA  
TTTATTATGACCATTTTGAAA  
CCGACACCAGCACCTAACGATATAAATAAGTTTCATTGAGAAAAAAATGAACTCTTTTA  
GTTTGGCCCGCGTACTATTGA  
ATAAGATTTTTCTTTCACACTACACCTTTCTGCCCGTAAGGTCCTACTATTCGGTCAAAA  
AGAAACCAAATTGACCATT  
TAAACTGTCTGTTATCATTTAAAGACAAAACTATGTCGTCACGTTAACTTTTTGGCAG  
ACAAGAGAACATGAAAAAAGT  
GATTAGAACATCATGTTCA GTTGCTGGATGAATAACTTTTATCGTACAGTAGGTGTTGGC  
ATAAGGGTAGACAAACTAAT  
ATTTCA TTAAAGCATGATTCATGTTTCCATTTTTGTTTGAGCAGACGTTTTTCAGAAGCCG  
ATGTAGACCAGGATGGGAAG  
ATAGACAAATCAGAATGGCACAATTTTGTCACCCACAACCCTTCCTTGCTCAAAATAAT  
GACTCTTCCATATCTAAGGTA  
TCTAGTTCTACAGTTACGTTCTTCTTTGTGCGTACCCACTTTAGAGGAATACCTCATTAC  
CTGTACTGAAAATAGAACCT  
TTCCACACATATTCAATGGGCGGGTTGGGTAATGAGTTACATTGGGTTCTAGCATATACA  
AAGGTACTTTGAATAAAATG  
ATTCAAGAGGTATGTATCAAAACCAAATTTCCACTGTACCCCTTTTAGCTCAATTAATGA  
ATTATAATTTTGACCCATT  
GAATCCTTTAAGATAAACTGAACCCAAATCACATCCAATTTACTTATCAAATTTATGCG  
AAATGCAGGGATATTACAAC  
CACCTTCCCAAGTTTTGTGTTCAATTCTGAAGTTGAAGAAATTGCAACATAA  
>CsCML3  
ATGGGCTGCTTTCATTCTACTGTAAAAAAACCGGTTCCCTGGGCATGAAAATCCGACTTT  
ACTTGCTTCTCAAACAGCCTG

TAAGTTAATCATTGTTGCAATGTTTTATCCAACGTGATTGGTACGTGTTGCTTATGTTGG  
TCTTTCTTAATTGTCTCTCC  
AGTTAGTGTAAGTGAAGTTGAAGCTCTATTTGAGCTATTCAAGAGCATAAGTAGTTCTG  
TAATCGATGATGGGTGATTA  
ATAAGGTAATCAATTTGTTTCGTTGATGTTAAGTTATCCTCAATGTCTAAAAACAAATTAT  
GCGGTCAATCTGTTTGTCTG  
TG TAGATAGGAAATTTATGTGGCATCTTTCCGTTGCAACATTTATCGTTTAATGAATCA  
AACTCTCTTTAAGAACTTG  
GGTTCTAATGTTCTTTTCGCTAAAGGGAAATTTAATTTTTTACCTGAACTATCGGTTCAA  
TTATTGTGTCTTTCATAAAA  
CACGAAGTATTAATTTGTCTCCTTACACTTCATTTTTTTCTTCGTTTCATCATTGTTTTATTA  
TGTTAGTATCAGATCCAG  
TTATGATATCTGTGATTGCCTTTGATGTATCCCTGATTTTCTCTTGAACAGGAAGAGTTC  
CAACTAGCGTTATTCAAGAA  
CAGAAAGAAAGAGAATCTCTTTGCAAACAGGGTATGATGCTTCTTCAGTTTATTTAAG  
TCACGTATAGTTCTCTTTGTG  
CATTATTTCTTTTGGGCATTGTCAGTATGTAGCTAATCTGAAAGATTGATTGTGTTATGTT  
GAAAATTTACTCTGCTGGT  
CTAGGACTACAAGAAATTGATTTTACTAAGTTTTCTGTTGTTGAGAAATTTTCATGATAAG  
TATCAGTAGTCGGCAGTTCG  
GCTAGAAGATGGTTGGAACCTGCATGTTAATTTAGTAATTATTTTACTTGCTGACATGTC  
ACGTAACACCTTCTTTTCTT  
TAGGAGTTTGCTACATTAAATATGCATATATTGATAAGAATAATTAGGTAAGAACCTGTAT  
GAGCCTAATAGGGTATAAC  
ATATCTGGTAAACTATAAGATTTAGTATTAAACCTAATAATTATTGAGATTGTAACCTGC  
ATCTCAATCATATTTTCATC  
ATTCGAAATTACTCTTTCAAGAAGGTGAGTGATGTAACCTGATCGGGTTGCGCACATATA  
GCTTTGCGACTTAAAAA  
AGGCACGTCAATAATCGAATGAGTGTGCGTCTTTGTGCTTTAGGAGTATCATTTTGTAAT  
GGACTAGTAATAACTCTGTA  
ACATAATATATGTTAAGATTTAAGAATATACTAGGATACTTTCAGATATGGCTATGACTGA  
TCTTTATATTAACACTTCA  
GATTCGATACTGGTCCAGGCATATATATACACTTTTTGAAATTATTTTACTACCTTTGTTG  
CAGTTTAAACTACATAAGC  
TGCTTCATTTTGGAGTTCATACTTTAATAACTTCAGTTTTTGCATTTTGGGGGTTACATA  
TCCATGTTATTTTCAGAGCA  
AGTGCACGTGAACGATGACGCATTGTATCTCCTCACCATTCAATTCAAACCCAACAGAT  
GAAAATGATCTACAACATAAA  
TTTGTTAATATTTTCATCTATTCCCTTTTCTGGCACATAATCATAAATTTATAATAACTTAA  
ATACCTTACATCTCATGA  
AGTTAGCCTTTTTTTTTTAGTGCTTACATAATAACTAAAACGCCCTACCTTTTTTCATCATAT  
ACCGTTTTTATACATAATC  
TTCACATAAATGAATTTGAGCACCTAATCTTAGATTTTGTTGAAACAGACCATCTAATAT  
CATTAAAGGAGTTTAGGTGCT

AAAAATGTTGTGCAAGGCGGCTGAAATGATAAATGCACTCGTATTAGATTTCCGATTTG  
GTGGTGCTGTTTTTATACTTC  
GTTACTGCTGTTCAAGAGAGTTTGTAAAGTTTTCTTAAGCTTGTAAGTTTCATATGCAGAT  
ATTTGATCTTTTCGACGTCA  
AGCAGAAGGGGGTTATTGATTTTGGTGACTTTGTTAGAGCACTTAACGTTTTCCATCCT  
AATGCTCCTCAAGAAGACAAG  
ATTAGTTGTAAGTTGATCATGATGACCCAAACTGTAAATTTCAAGTGGCCATGAATGGT  
CTTGTAATACTCATTGTTTCGT  
GTTTCAGTTTGTTCAGCTTTATGATATGGACGGAACAGGATTCATAGAGCGCCAGGA  
GGTACATTTCTGCCATTTTAA  
TGCTCTATGCTTTTCCATGTTTGTGTCCAAATATTATAGATTCTTAATAATTCCTTTTCGATA  
AAGAAGATTGTAATATTT  
ACTAAATATAGTAAGAATTGTATTAACAAGCTCGTATAAAGGAAAAAAAAAAGCCACCT  
GAATATCGTTTTTCGTTTTCTA  
AAGCTATTATGGCACGTGTGTAATTATTTGTCATAAAGAAGATTGAAATATTTACTAAAG  
ATAATAAGAATCGTATTAAC  
AAGCTCCTTCGTATAAAGGAAATAACCAAGCCCCTACATAAATATTGTGTTTTGTTTTCT  
AAAGCTATTATGGCTCGTGT  
GTAATTATTTGTCATAACATCTTCATTATGTGTATCGTTTGTAGGTTAAGCAAATGCTAAT  
CGCACTTTTATGTGAGTCG  
GAGCTAAAGCTAGCTGATGACACCATTGAGACAATACTTGATAAGGTGGGTTCATTTT  
ATTTATTATGACCATTTTGAA  
ACCGACACCAGCACCTAACGATATAAATAAGTTTCATGAGAAAAAATGAACTCTTTTA  
ATTTGGCCCGTGTACTATTGA  
ATAAGATTTTTTCATTCACACTACACCTTTCTGCCTGTAAGGTCCCTACTATTTGGTCAA  
AAGAAACCAAATTGACCATT  
TTAAAATGTCTGTTATCATTTAAAAACA AAAA ACTATGTGGTCATGTTAACTTTTTGACAG  
ACAAGAGAACATGAAAAAAG  
TGATTAGAACATCATGTTTCAGTTGCTGGATGAATAACTTTTCTCGTACAGTAGGTGTTG  
GCATAAGGGTAGACAAACTAA  
TTTTTCATTAAAGCATGATTCATGTCTCCATTTTGTGTTGAGCAGACGTTTTCAGAAGCC  
GATGTAGATCAGGATGGGAA  
GATAGACAAATCAGAATGGCACAATTTTGTACCCACAACCCTTCCTTGCTCAAGATAA  
TGACTCTTCCATATCTAAGGT  
ATCTAGCTCTACAGTTACGTTCTTCCTTGTCGACTGTGCGTACACACTATAGAGGAAT  
ACCTCATTACCTGTACTGAAA  
ATAGAACCTTTCCACACATATTCAATGGGCGGGTTGGGTAATGAGTTACATTGGGTTCT  
AGCATATACAAAGGTATTTTG  
AATAAAATGATTCAAGAGGTATCTATCAAACTAAATTTCCACTGTACCCCTTTTAGCTC  
AATTAATGAATTATAATTTT  
GACCCATTTGAATCCTTTAAGATAAACTGAACCCAAATCACATCCAATTTACTTATCAA  
ATTTATGCGAAATGCAGGGA  
TATTACAACCACCTTCCCAAGTTTTGTGTTCAATTCTGAAGTTGAAGAAATTGCAACAT  
AA

>CsCML4

ATGATAGAGAAGATAGATGTGAACAATGATGGATGTGTTGACATTGATGAATTTGGTGA  
GTTGTATAAAAGTATCATGGA  
TGATCGTGAGAATGAGGAGGATATGATGGAGGCTTTTAATGTATTTGATATAAATGGAG  
ACGGGTTTATCGCGGTTGAGG  
AGCTTAGAGCGGTTTTGGAGTCTTTGGGGCTGAAGCAAGGCCGAAAAGCCGAAGATT  
GTAGGAAAATGATCATGAAAGTT  
GATGTGGATGGTGATGGTATGGTTAGTTTTGATGAGTTTAAGGAAATGATGAGATCAGG  
TGGCTTTGCTGCTATGGCTCA  
AAATTGA

>CsCML5

ATGTTTGACAAAAATGGCGATGGAAGGATCACAAAGCAAGAACTAAATGATTCCTTAG  
AGAACATGAACATTTACATATG  
TGACAATGATCTTGACACATGATAGAGAAGATAGATGTGAACAATGATGGATGTGTTG  
ACATTGATGAATTTGGTGAGT  
TGTATAAAAGTATCATGGATGATCGTGAGAATGAGGAGGATATGATGGAGGCTTTTAAT  
GTATTTGATATAAATGGAGAC  
GGGTTTATCGCGGTTGAGGAGCTTAGAGCGGTTTTGGAGTCTTTGGGGTTGAAGCAAG  
GCCGAAAAGCCGAAGATTGTAG  
GAAAATGATCATGAAAGTTGATGTGGATGGTGATGGTATGGTTAGTTTTGATGAGTTTA  
AGGAAATGATGAGATCAGGTG  
GCTTTGCTGCTATGGCTCAAAATTGA

>CsCaM1

ATGGCAGATCAGCTCACCGATGATCAGATCTCTGAATTCAAAGAAGCTTTTAGCCTATT  
TGATAAAGATGGCGATGGTTA  
GTCCTTCATATTTCTTATAAAAAAATCCCTTTTTTTATTATTTGTTATATGACATGTAATG  
ATATGTTTTAATGAATGT  
GTTATAACCCATGGATTGATTTATTTGATTCTTTTTATTGTATTTGGTTATGTTATGTTGTT  
AGATCTGGTTTATTTGGT  
TGTTTGACTTTTTTTTATAACATTTTTTTGTGTATATGTGATGTGGGTCTAATTATAGATCA  
ATTTTGGATCTGTTTTTAT  
TTGTAATTATGTTGTGTAATATAGGAGAATGTTTTCTATGTATGTTTTTGTGTCAGATCTG  
TTTGGGGAATTATGGATGA  
TTGTTTTAGGACATTATGTGTCTGGAGATAGGATAGATCAATATAGTAATATATGGTTTTG  
GATGGTTTTTGCACATTTT  
GGTGCATAATTATGTTTGGGCGAATCATAACTTTTTTGGGGTTGGGACGTCAAGAATAG  
AATAAAAGCAGTGGCGTCTCG  
AGGGGAAATGAGCTTGTCCAACATGTTATAAGTGGGGAGTATATGACAAATTTACAACCT  
TGTCCCACAATAGGTATTCGA  
TAAGATGTAAAGGGTGTTTGGGATTGCTTAATAAAGCTGTTTCATCTGTTTATTGCGTTTT  
GATACTGTGAAAAAGCCTTT  
TATTAGTATGCTACATTATTTATTAGTATGCGGCAAGGTTTCATGGTTTTGTAGATGGAATG  
CAGATAATGAGTTTTAGTA  
ATTTGGAAAACAAAGCTATAATATGCACTTCGAAAGTTGCTTGTTTCCATTTGTTGTGAT

AATGTGATTATTTACGCGTG  
TATCAGGTTGTATCACAACCAAGGAACCTCGGAACAGTTATGAGGTCTCTAGGACAAAA  
CCCAACCGAGGCTGAGCTTCAA  
GATATGATCAACGAAGTCGATGCTGATGGCAACGGTACTATTGATTTCCCTGAGTTTCT  
CAACTTGATGGCCCGCAAGAT  
GAAGGACACTGATTCTGAGGAAGAGCTCAAGGAGGCTTTCCGGGTTTTTGACAAGGA  
CCAAAATGGTTTTCATATCTGCGG  
CCGAGCTTCGTCACGTCATGACTAATCTTGGTGAGAAGTTGACAGATGAGGAAGTCGA  
TGAGATGATCCGTGAAGCTGAT  
GTGGACGGTGATGGCCAGATCAACTATGAGGAATTCGTCAAGGTCATGATGGCTAAGT  
GA

>CsCML6

ATGTGTCCACAGGAACCTCTTATACCCCTAGCAACGAAACAAGCCGAACCTACGATCAG  
CATTCAACGTCATGGACGTCGA  
CCATGATGGCAAAATAAGCCACGACGATCTAAAGCGTTTTTACGCAGACTACGCGGTA  
AATGACAATGAAATTATCATAG  
GAACAATGATGAAGGAGACGGATTTGAATAAAGACGGGTACGTTGAATACGAAGAGTT  
TGAAAAAATGTTGTTTCTTAGG  
AGAAGTAGTAATGTGATGGAAGAAGTGTTTAATGAAATAGATAAAGTTGGTGATGGTA  
AACTAGGGTTTAGTGATTTACG  
AAGTTATCTTGACATGGCTGGGTTAATGTTAATGATGATGATGATGATGATGATATTAAG  
GCTATGCTATTGTTAGCTAA  
TGATGATGAGAATGATGGTGTTACTTTTGAAGGGTTTCTTAAGATATTAGCCATTTGA

>CsCML7

ATGAGTAAGTCCATTTTTCCGAGTTTCGTTTACATTTTTAGTACTTTCTACTTGATGATAT  
TAGTTTTTCATTCCTTTTA  
TCGTATGTGTTATCTTATGCAAGTTTAGATTCTTAACATAGAGGTTCTCATCAGCTTACA  
GGAGCGTATCTGATTATTAC  
GTTTGAAAAACACAGATAGTACGAAAATAGTGTTAGGCAAACCTGTTTAGAAAAGGTGA  
TTTTCTGCGTTTTCCCTGGAGAG  
AAAACACAGTTTTTGAAAAAGTAGCTTGACATATGCTTTTTTGAAAAGACTGTTTTTAAC  
GCATAATCAGTTTTGTAAACGC  
AATCCAATTGTTGATTAAAAGCCGTGCCCTTGTCTGCTTTATAATAGAACATCGATTTTA  
TTACAGATTTTATCACAGGG  
ATAACATGTTTGATATTTTATGAAGATACGTCCCGTCCCTGTCCTTCTCTCAAGTCATTAT  
TCTACGAAGTTGGAGGAAT  
GCTCCGATGTTGCAATTCCACAAATGAGTACGAGAGGCTGGACAGTGAGCTCGAGAG  
GAAAATGATAGAGGTCAAGAAAA  
GATATGTACCAGGAAATAGCAGCATCAGGTCCATCAACAGCATTATTCTGAAGTTTCCT  
CAGTTCAGACAAGGATTGGAA  
GAGATTAGAGGCGTTTTTCGACAGTTTGGTCAGTTTAACAAGAAATGGTGTAATAAT  
ATACCAACGGTTTTATCAGAT  
TCCCGTTTGTCTGATTCTCATTTCTTATGCAGATGTTGATTCAAACGGAACCATCGACCG  
TGAGGAGTTAAGAAAATGCT



TACACAAATTCCAATTCGACTGCACAGAGGACGAAATTAATGACCTTTTTGAGTCTTGT  
AACTTGGGCAGGAATCAAGGC  
ATGAAATTTAACGAGTTTATCGTTGTCTTATGCCTTATCTATCTCCTTACATGTACCTCCT  
CTTCAAACCATACTGTAAG  
CACAATGTTCTCAAATCTTTTGACAGTTCTCGAGCACAATCTAATAAATGGGCTACCTG  
TTTTTAGGCGACAACAATGGG  
ATCACCAGAGCTCAAATCAACATTTGATACCATAATTGAAGCGTTCTTATTTCTTGATAA  
AAATGGTGATGGGAAACTAG  
ACAAGAAGGATATGACTAAAGCTATGAACGATGATTTTCCTAAGGAGAAATCTCCGAAT  
CACATCACCATGTCACGATTC  
AGTAATACTTTTGGACTTAACATAAGTTCTTATAAGCTAAACCTTTTTTGTACAAGCAAA  
AAACAGTCAATTAATTGTCA  
AATCATTTTTCTTTAGTATGTAAATTGTGCATAAACGCAGGAGAAATGGACTGGAACAA  
GGATGGGAAAGTCGGCTTCAG  
GGAGTTCCTATTCTCCCTGATCAATTGGGTTGGGATCGACTCCAATAATGAAGTTCATGT  
CGAAGTAATCCGAGAACAGA  
AACCGTGA  
>CsCaM2  
ATGGCCGATCAACTCACCGATGATCAGATCTCTGAGTTCAAGGAAGCTTTCAGTCTATT  
CGATAAAGATGGAGATGGTCA  
GCTTTTCTCTCTTCATATTCATTTTCATCTATATCATGGTTGTTGTTTACATAATAGGATTG  
ATATTCATTTTTGAGATC  
TGGGTTTTCATTTTTGATGTTTGACTTTATGGATCACTGTGTTTTCTTGGTTAATGTCTGT  
CAATATTGATTTTGAGGTT  
AACTTGTTTTTTTTTTTTTTTTTTTTATATATATATCTGTTCATTGTCAGATCCGCTTAG  
CTGCAATTTTGTATT  
CGTTTGTAAGGTTTGTAGATTTATATGTGGTATGTGCTTAAGATCTAAAGTAACTAAGT  
TTTTGTAAATGTTTTATGC  
TTTTTTAGGAGGTGTTTGGGATTGGTTATAAGGGGGTGTTTTGAATTTGCTTTTTTCAA  
CTGCTTTTTGTGCTTTTAA  
ATAAGCGAATATACAGTTTGACTCGAGCACTGTAACTGCTCTTTTAAAAAAAAAAAA  
AAAAAAAAAAAAAGCAAATATG  
TACAAATCATCAATCTATAGGAACCCCTTAAGTGCATATCTACTTATCGAAATTTGAAAT  
AAGCAGTTGGGTAAAGTATC  
TTTAACTAAGTTTTTCAAATGCTTATTTTACTCATGAAGGGTAAGTTAAGCAGATTG  
AATAAGAATATTAACAAACA  
TCTTTGACCTTATAAACTGGTTATATGATGTACTCAAACATATTGTCATGGAAGAAGTTA  
TGTGTATGTTGTACAGGTT  
GTATCACTACCAAGGAGCTTGGAACAGTTATGAGGTCTCTTGGACAAAACCCACGGA  
GGCTGAACTCCAAGACATGATC  
AATGAGGTCGATGCTGATGGAAACGGTACTATTGATTTCCCTGAATTTCTTAATCTGATG  
GCCAGGAAGATGAAGGACAC  
TGACTCTGAGGAGGAGCTTAAGGAGGCTTTCCGTGTTTTCGACAAGGACCAAAATGG  
CTTCATTTCTGCAGCTGAGCTAC

GTCATGTTATGACAAATCTTGGTGAGAAGCTGACTGATGAGGAAGTTGATGAGATGAT  
CCGTGAAGCTGATGTGGATGGT  
GATGGTCAAATCAACTATGAGGAATTCGTCAAGATCATGATGGCCAAGTGA  
>CsCML8  
ATGAAGTTTTCTCAACATCTAATGTTTCCATCCCGTTTTTCGCTTGAGCGCTCCGAGATT  
TTGGTCGTTAAGCATGATTC  
CAACTTGTCAAAAGCACACGTTTCCTTCACCAACAAGAACATTGTGGACGATGCATGT  
GTCCAAAGAGACGACGTGGAGC  
TAATAATGGCGAATTTAGGTGTTTTTGGCATCCTGAAGGCGAGAAGGTGCCCCGAGGT  
GATGACTTCTAATGACTTGTTT  
AATATTTTTGAAGATGAGCAACCAAGGTTGGATGAAGTGAAACAAGCTTTTGATGTGT  
TTGATCAAAACAAAGATGGGTT  
TATTGATGCAAGTGAGTTGCAACGAGTTCTTGTTGTTTTGGGCTTGAAGGAAAGATCG  
AATATCGAAGATTGTAGGAAGA  
TGATCCGAGCGTTTGATGAGAACGCCGATGGTAGGATAGATTTTGATGAGTTTGTTAAG  
TTTATGGAAGCTACCTTTTGT  
TGA

>CsCML9  
ATGTTCCAGCCAGACGTCGATGAAATGAGACGAGTTTTCAACAAATTTGACAAGAACA  
AGGACGGTAAGATATCCAAGGA  
AGAGTATGGTTCGGCCGTTGGAGTACTTGGTAGCAAAAACACTAAATCAGACGTGATC  
AAGACGTTTCAAGCCATAGACA  
CTGACGGGGACGGGTTTGTGGACTTTAATGAGTTCATGGAGGCTCAAAAGTCGGAAG  
GTGGTGTTAAGACAGCGGATATA  
AAGAGTGCGTTTAAGGTTTTTGATTTGGATGGCAATGGGAGAATAACAGCAGAGGAGC  
TTGTTCAAGTGCTGAGGCAGTT  
AGGAGAGAGGTGCAGCTTGGAGTCTTGCCGAAAAATGATTAAAGGGGTCGATGCAGA  
TGGGGATGGAATGATCGACGTTG  
ATGAATTCATGGGTCTAATGACCCGTAACATGAAACTGGCATAA

>CsCML10  
ATGGCAGATGCTGATCATCAAGCGAACCTTGAACGAATCTTCAAGAAATTTGATACCA  
ATGGAGATGGCAAGATCTCATC  
ATCAGAGCTTGGAGAAGCTTTGAAGACGCTCGGCTCTGTGTCACCTGAAGAAGTGCA  
ACGTATGATGCGTGAAATCGATA  
CTGATGGAGATGGATTTATTTCTTATCAAGAATATATAGATTTTGTAAATGCTAACAAGG  
GGTTAATGAAGGACGTTTCC  
AAGATCGTATAA

>CsCML11  
ATGGCTGATGAAGACAAGGCAGAATGTGATCGCATCTTTGGCGCATTTGATAAAAATG  
GAGATGGTAAGATCTCTGCAGC  
TGAGCTTGGAGAATCTTTGACGAAGCTCGGCTCTGTGTCACCTGAAGAGGTCCAAACT  
ATGATGGATGAACTTGATACCG  
ATGGAGATGGGTACATTTCTTATGATGAGTTCGCTGAATTTTTTAACGCAAACCGGGGC  
TTAATGAAGGACGTTGGCAAA

ATCTTCTAAGAATTGACAATACTGATATCTTTATTTTTGGCAATACCTTTCTCAATTGATA  
AGTTTCAGTTGCTTTATAT  
CTTTGTTTATTATGTTTGTGTTAACAGTTAACGGTGACATATTTGCTTAAGATATATAAAA  
TTACAAGCAATTATTTGCA  
ATAGAGAAGATTGTTCAATCTAGTAATCTACAATCATATCCGTAAGTGTATTTAACTACT  
CCGTATTTACTATTTTTTTT  
AACATGTATGTTGCAAAATGAACATGTAAAAAGGAAAATCAATTACCGGAACAAACAC  
TTCTCACTTAGGGGGTGTGTTG  
GATTGCTTATTA AAAATAGATTATGCGTTTTGAAAACGGATTATCAGATAATCAGTTGTT  
ACAAAACGTGATTTTAACAT  
ATAGTGTGTTGGACATGACAAAGTAGATTATTTTCATACTTATTAGTAAAATGACCAAAGT  
AGCCACACAAAAAATAAAGA  
AAAGTGAAATAGGAGGAGTGACTTTGTAATATTGCCCTAAAAAGTGAATTGCGTTTCCC  
AATTGGATGACTCTTCCTACT  
GCCACAAAACGTGGTTTTGAAGCAAGTCAAACGCAGAAAAGCAATTATCACTTTATGT  
TTCCCAAACACTTAAAATGGAT  
TATTTGCGTTTGTGAAACGCAATAATCAAATAATTTAAACCAAACGCAATGCCAAACA  
CCCTCTTAATTACAAAAATAT  
TCAAAAAAAGTTACTAAAATCGACACTTTGGCCGAGCAAACCATTTGCTCTCTAATTCA  
TTTCGCCACACATCCTTGCT  
ACAGGATAAAGAACATGGAAAGCAAATGTTATGCTCTCTCTCCCAATTGCTCTCCGGAT  
CGCTACAAGACAAAGAACATG  
AAGAGCAAATGCTTGCTCGCCCTATGTTTGCTCACCATTTTCAACGACAAGACAAAGG  
ACATGAAGAACAAATGCTTGCT  
CGCCTAAATTGTTGATTTTGGTAAAACGGGTTTAGAAGGTTTCATTTTAGTAAAGGTGAA  
GATAAAGTGTGTATTAAAAA  
AATCTCTTAATTCAAATGCAACTGGTACGTGCAGTAACGAGCAAAGTTTTTTGGACCGT  
GAACTTCCGAATGTGAGTTTC  
TATTCCTCTTACAACGTTACAGAGTTTCGAGATAAAGCTTCGTAGCTTGTGGGGTTATG  
GATAGCAATTTTGACACGGTA  
ACTTATGAACGGATCAATACATGTAATTCTTTAAATAGGTCAAATGCGTAAAATGAAATA  
GTTTGTTTAAAAGGATATGA  
GGCAAACATGTTAACCTTTTCGAAAAATGCTCAATCTCTATTTTTTTCATATTCGTTATAA  
TCATATTTGACACCCTTTA  
TTATCAACTTTGGACAAAAATCCACTTTCGGGGGTCTGATGACGTATAGCACGTATAAC  
AGGCCTATTATACGCATTTTCG  
GGTCCAGGCCCAACAACAAAACAACCACAAGCACCAGACTGCAAGTAAGCCCAATAA  
CAAATTGGTTACGGTTCGGACTC  
AAAGACGCACGCAGGGTACTTAGCGGACCAGACCCATGGCCGCGGAAGGTGTTCTGT  
GTCCGCGTCCACGACTACTGCGG  
AACCTTG CATGACAAAGGTCCCACTTCGGGCACTAACTTTTATAACCGAAATTTTAAGA  
AACCCTAGCATTAGCCTCGGC  
TATAAAAGGAACTCTAATCCTATCATAAGGTACAACCTTCTCTCACATAGTAATACACAC  
ACTTTTATTCTCTGACAAGA

ATGTATATGTACTCTCACGCCGGAGCTTAATCATTGGGTCCGTCCCCACGGTAAGGCTA  
ACGGTTCGTTTTTCATTTGTGC  
AGGGTTTCAATCCATCACTTGGTTTAG

>CsCML12

ATGTCTATAATGATAGCTGAATTTATCCAATACTTGTCTCCCATGTGTTTCTCAACATGA  
TCATCTACCCACAACCTCGG  
GTATTTCTTGGATGACTCCAAGATTCATGTTGAGAAGAGGAACAAAGATTCTAGATTGC  
CGAAAAGGTTGCCTTCATTTA  
AAGACGGAAGTGTACGAGGAGACGAAGTGCAGACGGTTATGGGGAACCTTGGAATCT  
TTTGCAATTCTAAAGGGGAAAGC  
TTTCCAGAGAGATTAAAGTTCTAACGATCTTTTTTAACATGTTTGAAGAAGAGCATCCGGA  
ATTGGATGAAGTGAAGGGAGC  
TTTTGACGTGTTTGATGAGAATAAAGATGGGTTTATTGATGCAAAAGAGTTGCAGAGA  
GTTTTATCTGCTTTAGGATTGA  
AGGATAGAGCAGCTATGGATGACTGCAAGAAGATGATCAGAGTGTTTGATGAAAACGA  
TGATGGTAGAATAGATTTTGAT  
GAGTTTGTCAAGTTCATGGAAGGCACATTCTGTTGA

>CsCML13

ATGGATAAAGAACAACAATACAAACGTGTGTTTGGACACTTGGATGCAAATGGTGACG  
GAAAGCTATCTCCACCAGAGCT  
CCAAATTTGTCTTGGAAGATTGGAGGAGAGTTGTCATTGGAGGAAGCTGAGATCGCG  
GCTGCTTTGATGGATTCGGATG  
GGGACGGGTTGTTGAGCATGGAGGACTTGGTGAATGTGGTTGAAAGTGCAAACGAAG  
AGGAAAAGATTGATGATTTGAAG  
ATGGCTTTTAAGATGTACGAAGAAAAGGAAGGATGTATAACTCCGAAAAGCTTGCGAA  
GAATGCTTAGCAAACCTGGGAGA  
GTCGAGAACCGTCAATGATTGCAAGGTGATGATTAATAAGTTTGATGTTAATGGTGATG  
GTGTCCTTAACCTTCGATGAAT  
TCAGGATAATGATGGCATGA

>CsCML14

ATGGATAAAGAACAACAATACAAACGTGTGTTTGGACAATTGGATGCAAATGGTGACG  
GAAAGCTATCTCCACCAGAGCT  
TCAAAGTTGTCTTGGAATAATTGGAGGAGAGCTGTCATTGGAGGAGGCTGAGATCGC  
GGCTGCTTTGATGGATTCGGATG  
GAGACGGGTTGTTGAGCATGGAGGACTTGGTGAATGTGGTTGAAAGCGCAAACGAAG  
AGGAAAGGATTAATGATTTGAAG  
ATGGCTTTTAAGATGTACGAGGAAAAGGAAGGATGTATAACTCCGAAAAGCTTGCGAA  
GAATGCTTAGCAAATTTGGGAGA  
GTCGAGAACCGTCAATGATTGCAAGGTGATGATTGCTAGGTTTGATGTTAATGGTGATG  
GTGTCCTTAACCTTCGACGAGT  
TCAGGATAATGATGGCATGA

>CsCML15

ATGGATAAAGAGCAACAATACAAACGTGTGTTTGGACACTTGGATGAAAATGGTGACG  
GAAAGCTATCTCCACAAGAGCT

CCAAATTTGTCTTGGAAGATTGGAGGAGAGCTGTCATTGGAGGAGGCTGAGATCGCT  
GCTGCTTTGATGGATTTCGGATG  
GAGACGGGTTGTTAAGCATGGAGGACTTGGTGAACCTGGTTGAAAGCGCTAACGAGG  
AGGAAAGGATTAATGATCTGAAG  
ATGGCTTTTAAGATGTACGAAGAAAAGGAAGGATGTATAACTCCGAAAAGCTTGCGAA  
GAATGCTTAGCAAATTGGGAGA  
GTCGAGAACCGTCAATGATTGCAAGGTGATGATTGCTAGGTTTGATGTTAATGGCGATG  
GTGTCCTTAACCTTCGAGGAAT  
TCAGATTAATGATGGCATGA

>CsCML16

ATGGATAAAGAACAACAATACAAACGCGTGTTTCGGACAATTGGATGCAAATGGTGACG  
GAAAGCTGTCTCCATCAGAGCT  
CCAAATTTGCCTTGGAAGATTGGAGGAGAGCTGTCCTTGGAAGGAGGCCGAGATCGC  
GGCTGCTTGATGGATTTCGGATG  
GAGACGGGTTGTTAAGCATGGAGGACTTGGTGAATGTGGTAGAAAGTGCTAACGAGG  
AGGAAAGGATTAATGATCTGAAG  
ATGGCTTTTAAGATGTACGAAGAAAAGGAAGGATGTATAACTCCGAAAAGCTTGCGAA  
GAATGCTTAGTAAATTGGGAGA  
GTCGAGAACCGTCAATGATTGTAAGGTGATGATTGCGAGGTTTGATGTTAATGGTGATG  
GTGTCCTTAACCTTCGACGAAT  
TCAAGATAATGATGGCGTGA

>CsCML17

ATGGACAAAGAACAGCAATACAAACGCGTATTTGGGCACCTGGACACAAATGGAGAC  
GGGAAGCTATCTCCTCCTGAGCT  
CCAAATTTGCTTTGGGAAGATTGGTGGAGAATTGTCATTGGAGGAGGCTGAGATAGCA  
GCTGCTTTGATGGATTTCGGATG  
GAGACGGATTGCTAAGCATGGAGGACTTGGTACAAGCGGTTGAGGGCGCTAACGAAG  
AGGAAAAAATTAATGATTTGAAG  
ATGGCTTTTAAGATGTATGAAGAAAAGGAAGGGAGTGGATGTATAACTCCGAAAAGCT  
TGCGAAGAATGCTTAGCAAGTT  
GGGAGAGTCAAGAACCGTCAATGATTGTAAGGTGATGATTGCTAAGTTTGATGTTAATG  
GTGATGGTGTCTCAACTTCC  
ACGAATTCAGGGAAATGATGGTGTA

>CsCML18

ATGGACAAAGAACAACAATACAAAAGTGTGTTTCAGACACTTGGACAAAAATGGAGAT  
GGGAAGCTATCGCCACCGGAGCT  
CCAAACCTGCATTGGAAGGTTGGTGGAGAGTTGTCCTGGAGGAAGCCGAGATGGC  
AGCTGCTTTGATAGATTCAGATG  
GAGACGGGTTGTTGAGCATGGAGGACTTGGTGAAGTGGTCGAAGGTGCAAACGAAG  
AGGAAAAAATTAATGATTTGAAG  
ATGGCTTTTAAGATGTATGAAGAAACGGAAGGGAGTGGATGCATAACCGCGGAAAGCT  
TGAGAAGAACGCTTAGCAAAT  
GGGAGAGTCGAAAACAGTTGATGATTGTAAAATAATGATTGCTAAGTTTGATGTTAACG  
GTGATGGAGTCTCAATTTTG

ACGAATTCAGGGAAATGATGGCGTGA

>CsCML19

ATGGCAACTGAAACAACAAACCCTACCACAACCTACCCAACAAACATCATCATCAGTGA  
ACCTAACCAACATCGAAGAAGT  
AAAGAAAGTATTCAACCGTTTCGACACCAACCACGACGGCAAGATCTCATCTTCGGAG  
CTCATCTCCATCATGAAATCCC  
TCGGATCCAACATCTCAGAGGACGAAGTCAGACAAATGATGACCAAGATTGACACTGA  
TAACGACGGGTGCATAACCCTG  
GAAGAATTTGCAGGGTTTTGTAAAGATGATACTGCTGATGATGGGGGAATGAAGGAGT  
TGCATGAAGCTTTTGAGCTTTA  
TGATTTGAATAACAATGGTTTGATTAGCTCTAGTGAGTTGCATCAGATTTTGACGAGGT  
TGGGTGAGAGTGTGAGCGTTG  
AGGATTGTGTTGGGATGATTAAGTCTGTTGATGCTGATGGTGATGGCTTTGTAACTTT  
GAGGAGTTTAAGAAGATGATG  
AGTAATGGCAAGACTGAGCCGTAG

>CsCML20

ATGGGTTTAAAAAATTTGTTCAAGGGTAAAAAAAATCAACCCAGAACAACAACAAC  
GTGGTCGTGGGTGTTGCTGTTAG  
AAATCCAAACAATACATCATCGCCAGTTCTTTTCGCGATCAAGCTCGTGCAACTCACGTG  
CTCGGATCGAGGAAGAACTAA  
CGCAAGTTTTTCAGAAAATTCGACGTAAACGGAGACGGAAAGATCTCCGCCTCCGAAC  
TGGGATCAATAATGGGGTCCCTG  
GGCCAAAAACCCACAGAAACCGAGCTCGAAAACATGATCAAGGAAGTTGATGCTGAT  
GGGGATGGGTTCATAGATTTGCA  
TGAATTCATTGCTCTTAATACTAAAGATATCGATTCAAATGAGCTTTTGGAGAATCTAAA  
AGAAGCCTTTTGTGTATTCTG  
ATATTGATAAGAATGGTTCTATAAGTGCTGAAGAGCTGCAGAAAGTTTTGGGCAGGTTG  
GAAGAAAGCTGCACCATTGAA  
GAGTGTAGGAAAATGATTAGTGGTGTTGATGTTGATGGAGATGGTATGATTAGTTTTGA  
TGAGTTTAAGGTTATGATGAT  
GAGTGGTAATGGGTTTGTGTCTAAGAAGAATAATAACCGAGAGATGAAGGAAGAATAA

>CsCML21

ATGAGCAAAGTGTGAGTAATACTCTACATTACAGTAGCCATACTAATCCTCATTCTAATC  
TCCAACAAAAACACCAACAA  
CACCTCCTCCAACCGCCACAACCGCCGCCACCGCCGCCTCAAGCTCCGCTCAAACCTC  
ACCACCACCCCATACCCACCA  
CCCCCATACCCACCACCCCATCAGATCACCATATCTCATTTGACCCCTTATCGCAGACA  
TTGAACGTAAACGTGAAGAC  
AAACAATGGGAACAAACCCATTACTTTAATAAGGACCATGGTGATGTTTCATGATCATGG  
TGGTGATGACGTGGCACCTGG  
AATGGAGGGACAGCCAGAATGGGAGGATTTTATAGATGCTGAGGATTATTTGAATGATG  
AGCATAAGTTTAATATTACGC  
ATAGGTTGGTGTTGTTGTTTCCCAGGATTGATGTTGATCCTGCTGATGGGTTTGTTCGG  
AGCATGAGTTGACGCAGTGG

AACTTGGAGCAGAGTCAGAGGGAGGTGTTGCATAGGAGCCAGAGGGAGATGGAGCTG  
CATGATAAGAATCGGGATGGGT  
GGTTAGTTTCCACGAGTATTCGCCGCCTAGTTGGGTGAGGGATACAGGTAATAATTTCT  
TTGTATTTTGGCAACTTTTTA  
GTGGTTGATTGGTAGTATAGAAATGTTGGCATTGTGTTTATTATGTGGTTATGTAATGTG  
GAGTACTTAGGATGGCATAA  
TTAGTTGTAAGGAAATAAATTTGAAGTTGTGATACGAGTAATTATTTAAGGATTAGAGA  
TTTAAATGTAAAATGGCCCC  
TAAATACTGAGATAATCATATGTGAAATTTGGGGTGTCTTTTGTAAAAGCAGTTTGAA  
TAAGCAACTCCATTAGTACAT  
GTTGCTTATCCAAGACAGCTTATTTGACAGGTGAATAATCTATAAGCAATCCCGAAAGC  
TCTCACAACCTGCTTATGTGT  
GTTTCTAAGTGCAATAAGCAAATTTGTTAGCGATCCTATGCACCCCATTCAGTTTGTGT  
CGCTGATCACTTGAATAACC  
AGAATCAGTTTCACTACCCAAACGCTAGACGCTGCCATACATATCCTATACGTAGCTAG  
TAACATCAGGTTTGGGTTTT  
AACGCTACCTTCTATTAGGAGTTAACTGTAATTTCAAATTGATGATTATTTCTTAAATGT  
AGAGAAGTTGGTCATTGCT  
GCATTTAACTGTATGAAGGTTTGATGATGCAGAATAGTTACATGTTCTGGGTAAAAAAA  
ATTAAGCACTAGGTACAAAAC  
ATGAACTCATTCTATTGAGAACTGTTAAAAGTGTCACTTAGGGAACTTGTAGCGGATAT  
GTAATCATGTAGTTGTGAGTG  
GTGTATTTTGGGGATATCTAGTATCGATTACATGCTGAATCTCGTAAGAGGATAGAGA  
AAGAAACACGCCATCTAAAA  
AATGCACTTGAAGTATTATATGCTAGGAAGAGTCTGTCTGCGATACGAAAGTGGGTGCT  
TTATGTTTGTATGTAAGATT  
TAGAAAGCTTTTGTATACCATCTTAAAAGTGTTTCAGAGATTCAGAGACTAACTTAA  
TGTATGCATTATCTTTCTGAT  
TCTTATGATTTACAAGATACCATAGTGGTCTTAGCATAAATGATTGTTACTTGAAGAGTT  
GAAGTAGGTTTCTGTATATT  
CTATAAATTTGGGTATTCCACTTGCAACTTAATCTGACTATATCTTGAGCAGATAATAA  
CTCATTGTTGGGTATGATATGG  
GTTGGTGGAAGAGGAGCATTCAATGCATCTGATATTGACGGTGATGGTTTTTTGAAT  
TTGACCGAGTTCAATGAGTAA  
GATACATGCTCTCTTCAAGTATATGAATTTGTTGCATCTTATAGACTCATATCTTGTTTAT  
ATCCTTAATTTGTGTTTTT  
TTTCGTGATATATACAGCTTTCAGCATCCCGCAGACACTAAAAACCAAGACTTCTTCA  
GTGGCTGTGCAAGGAGGAAGT  
AAGGTTGACATGCTACTTTCAACTAGTTATATTTTAGATTAATTTTCTAGTACATGTTTGC  
CACACACACACATGTTT  
ATTATATCTCAACTATGTATTATAAATAGATTCTCCTAAGGAAATGTGCATGTTCTTCTTT  
GTAGTGGGGTTATTGATT  
TTTAATCCTATTGGGGAATTAGTAGCTTCCACTAAGTACGTGTCTCTTTACTAGGTGAG  
ACCTAGTCAATTCTGTTTAT

GTCCATACAGGTCTGCTGCTAAAGTTTAGATGTTCTTTGTGTTTCAAGAAAACATTTTGA  
GAAGTCGAATGCCCTTTTAG  
ACTAGATATTGCGCCTTTTAAGCATATGCTTAAGTGGGCACTCAAGATTGATGCAGCAG  
AATAATAAAAAAAGAAAAA  
AAAATCTAGTTTGGCTTCTGTAGTTTATGATAGTGTAATATGCTAATTGCCAAAAGCAAG  
GAGATGAACAGATGGTGTT  
GGATGTGTCTTTACTTATATAAAGTTGTAAAAATGAAACAATTAAGTGTGAGCGTTTG  
TCCAATTCTCTTCATGTAAG  
AAGTTTTTTACATAAAATGACCGAAACGGACATTTATATGAAAGAAGGGAGCTACATCT  
TGTGAAATGGAAGTAAAAGTC  
AACAAGAATTTAGTTTTATTACAGCTAGTATGAACTAATGAATCCAAAACGAATTTGT  
TGCAGGGAACGAGATACTGAC  
AAAGATGGGAAGGTGAATTTTAAAGAGTTTTTCCATGGACTATTTGACCTCGTAAGAA  
ACTATGACGAAGAAAGTCATCA  
TAATTCTTCACATGAATCTAATAACGATTCATTGGAATCACCGGCAAAGAGATTTTTCTC  
CGAGCTTGACAAGGATGCTG  
ACGGGTAAATCCCGCACCTTTACGCTTTATCACTATATAGAATACATGTCCATAACTACG  
TAATTTTGATTATGCTAACT  
TTTCTGTTGTAGATTCTTGTCTGACGTGGAGCTACTACCTATCATCGGAAAGCTTCATCC  
ATCAGAGCGTTATTATGCTA  
AGCAACAGGCAGATTATATTATATCACAGGTAAGAATGTTTGAATATAATTTTTTCATGTC  
GCTGTGTATATATGAATATA  
GAATCCACAATATGATAATCTTAATATTATTTACGGCTGATACGGATAAAGATGGACGGC  
TATCCTTGACTGAAATGATC  
GATAGTCCATATGTATTTTATAGTGCTATCTTTAACGAGGATGATGAAGAAGATTATGAAT  
ACCACGATGAGTTCCGTTA

A

>CsCML22

ATGAAAACCATGACATTAAGAATGTTGTTGTTTCTTAAAGAACTACGGAATCCTAG  
TCGAATTATCCAACATGCTCT  
TCTTGCTTCCGAGACATCATGTTAGTAGCGAAAATTTACATATTTGACACATAATTTAGT  
GCGAGTTAATCTAATTGGCA  
TCTTTTTGTTTCACAGTTACCATCAATGAAATAGAGGCATTATACGATCTTTTTGAGAGA  
TTAAGCTATGCTATCATTGA  
AGATGGCCGTATTCACAAGGTATTATAAAAAAATAAGTTATAGACGTATATGAATCATGA  
ATTTTGATAGCAGTGCTCTC  
ATTGCAAAAATAATGGAATCATTCAAATGTGTCTTTTTTGCAATTTATAAACAGGAA  
GAGTTCCGGCTTGCTCTTTTC  
AGCAATAGCACCATGCAGAATCTCTTGCAGATAGAGTGAGTACACAGTTTTCGAAAA  
TTTCTTATCTCAAATGTGTTAT  
TTCTGCCTTAAACGTTGAGATTTTTTAATCGTTTCAATCTAGGCTGTCAGCCCAAATGTT  
TGATTTCTTGATTGCATTAC  
TGCAGCTATTTGAGTCATTTGACATCAAGAAAAATGGAGTTATTGAATTCGATGAATTC  
GTTCTGTTGCTAAGCATCTTC



CATCCTAATGCACCAGAATCAGATAAAATTGAATGTAAGATACCTTTAACACAAGTTGA  
TGATCTATTGCCACAAAACGA  
GTTTATTTTACTTCTAAAAGTCGTATTTGACTACTTTTGAAATTTGTGTCATTGTAAATTC  
ATTGATACTGACATTATAT  
AATATCATTGCAGTCATGTTTAGATTATATGACTTGAGGCACACTGGATTCATAGAACGT  
GAAGAGGTAAATTAAAACAC  
ACTAAAGTTCCGACCTTTAGTCGATGTTTAACTTTTACTGAACTCTGATCTTGGAATAC  
TTCAAAATTTGAAGTTGAAG  
GAGATGGTAGTGGCTCTCCTGAGTGAAATGGATGTGAGTGTATCAGATGAAGATATCGA  
AGCTATCCTAGACAAGGTAGC  
AATCATAGTTTTAAGGCTTTAGTTATAACTTTACAATCTTCAACTTTTGACATTTTATTCG  
TGATCTTTTCGTGTTTTGTC  
TTTGACCGTTCCCTCTTATGTTTGATCAGACACTTTTGGATGCAGATCTAAACGGGGAT  
GGAAAGATTGATTTAGAAGAG  
TGGAAGATATTCATCTCAAAGAATCCATCCATTCTCAAGAACATGACTCTTCCCCTTCTT  
AGGTAAGTCTTGATTATCTA  
GTGCTTATTTTGATCATAATAACTATAAGCTGTTGTTTATAATAGTTTATTTTGATCAAAA  
CAACAGGGAGATCACTCAA  
GCCTTTCCAAACTTCGTCTTGAATACTCAAGTCCAAAACCTAGAAGTAGAAGTATAG  
>CsCML23  
ATGAGCAGTGACAAAGAACCAACCGTGAAACTCGACGACGAACAGCTAAGCGAGCTA  
CGTGAAATATTTAGATCATTCGA  
TAGAAACAACGACGGAAGCCTAACACAGCTTGAACCTCGGTTTCATTATTACGCTCACTA  
GGCCTCACACCTAGCTCAGATC  
AACTCGATACATTAATACAAAAAGCCGATACAAATAGCAATGGTTTGGTTGAATTTTCT  
GAGTTTGTGGCACTCGTGGCA  
CCCGAGCTTCTTCCTGCTAAATCGCCTTATACAGATGATCAGCTGAAGCAGCTGTTTAA  
GATGTTTGATAGGGACGGA  
TGGCTATATAACGGCTGCTGAGTTGGCTCATTCTATGGCGAACTAGGACATGCTTTGA  
CGGCTGAGGAGCTTACTGGGA  
TGATCAAGGAAGCTGATACGGATGGGGATGGACGGATTAACCTTTCAGGAGTTTTCTCG  
CGCCATTACTTCAGCTGCTTTT  
GATAATTCTTTTTTCGTGATTTTGGTTATTCGTTTGCATACCTTTTTTGTTTTTCAGGTATGGT  
TTTCGGTTTATCATGATCG  
TTTGTATTTTCAGTTTTGAAAGAGATTAGTTCGTTATATGTGTTTAAGTAATAGAAAATC  
GGCTTTGTGTTTAGTATAAG  
TATAAACCATAGTGATTATTTGATTAAATTTGATCGGTTTACAGCTGCAAAAGCCTGCAA  
CAAAACTAATTTTGATTTAT  
CAGTTACTGTCAAACACTAAAAATCATAGGTGATATCAAATTTTACGACTTCAGCTACT  
AGAAGAACATCCAAACATTA  
TCTACTGCGACCCGATTTGTTACTAGTCTATCTTTTCTTATTTTGATGAATTCATATCAGA  
TAATCAGATTTCAAATAT  
TATGTGAAATATTCCTTAGTGTTTTTCGATTTTTTTTACAGGAATTAGATTCTTTAGTTATTA  
GAGGTGAATTACACACCG

CACTTTTTCTTTGTACAGCACAAACATGTTTCTCTTGAGCATCTCACTCTTGCAGGCT  
GTTGTTGTCTTATTGGTACTC  
TAGGTTGTTTGGTCTTCCAACCTTTATACATAAAATTTAGGTTTTGTTAGTGTAACCAATAT  
ATGTGAAAACGTCAGATAC  
TAATTACAGAGTACTAAAGACTAACATTGATGTTTACACGTTTACAAGAGTTAACAGAC  
AAAAATTGGTCTTGATTTGTG  
GCTCGCAGGATTTTAAATAGCAAACCTATCAACCAAACTGACAGATATTATTTGTTGGTT  
CACAGATGA  
>CsCML24  
ATGGGCTGTTGTTATTCTGCCATGGGTGTTCCGGTTGTTGCCCCGTGAAGATTCTAGGAC  
CCTTGCTTCTCAAACAACCTG  
TAAGTTGCTTCGCTAATTGATAGTCACTTTGAGTTTTATATTCATCGTATGCCTATGAACG  
TGATATATCTTAATTGAGG  
AGTACATAAAATGTAACAACAACTGGCTTGTGTAACCTTCTATAGAACATTTATGCTCA  
AGGTGAACCATATTTTGATTG  
TATCACCCAATATTAATAATCTTTGCTTTCATTTTATAACAATCATCTCTATGCAGTTAG  
TGTTAGTGAAGTTGAAGCA  
CTATTTGAGTTATTCAAGAGCATAAGCAGTTCTGTAATCGACGATGGGCTAATTAGCAA  
GGTATTTTATGTTAGCATGTC  
TAGTTAAGAATCATTCCGAATTTGTCCATGTATATCCATTAGCGATGATTTTTGTTCAATA  
TGCTATGCACCTCTATTTT  
TTTGGATAGCGATATCTGATAACGCACATGCTATAATGCAGGAAGAATTCTTACTAGCCT  
TGTTCAAGAACAAAAGGAAA  
AAGAATCTGTTTGCAAATAGGGTACTTTCCTCCAATTTACTTTCTGATATATGTAGCAAG  
TACTTCAATATATAAGACC  
AGTCTGAATGAATAATACGGAATTTGTGTATTGTATCAGTTGTAATATGACATCTTTCAAT  
ATGGACAGATTTTTTCTCT  
TTTTGACGTTAAGCGTAAGGGGGTCATTGATTTTGGTGACTTTGTTAGATCACTAGGCG  
TGTTTCACCCTAGAGCTCCGT  
TAGAAGATAAAATTAATTGTAAGTTGGTTATTCTTAATCTTAATTGGATTTCTTATCAAC  
GTAATAATCTTATAACTAC  
TTTTCTGCTTTAGTTTCGTTTAAGCTTTATGATTTGGAAGGAACAGGCTTCATTGAGCGC  
CGAGAGGTACTGTCTATTCT  
AATTTTGCTCTTATACAAATGAAACAATAGCGTTATTTTCAATATCATTTTCTCCTGCAA  
TTTTTGCAGGTGAAACAAA  
TGTTAATTGCACTTTTACATGAGTCAGAGCTAAACTGGCTGACGAGGCTATTGAAATG  
ATACTGGACAATGTGAGTTTG  
CTGCTAATGGAAATATTTATGCCTTCCTTTACGTATTTGGTAAACTTGATTTGAATTGTTT  
TTTTCTTTCTTTCTGGCAG  
ACATTTTCAGAGGCGGATGGAGACCGGGATGGAAAGATAGACAGATCAGAATGGCAC  
GCTTTTGTTACCAAGAATCCTTC  
CTTGTTGAAGACAATGACACTTCCTGTTTTAAGGTATGTCGTATCATAAGATCATGCACC  
AATACATTATGAATACTAAC  
GTCAAACCTTTTGTTACTTACTCATTATTCTTTATAGATTTCGATCTCACTTTGATATTTGTA

AAATGCCAGGGATATTACA  
TCAGCATTTCCAAGCTTTGTTTTCAATACTCAAGTTGATGAGATTTCTGCTCCTCAAGTT  
GAAGAGGTTGAGATTTTCATC  
TTCTCAAGTTGAAGAGATTGAGATTTCTTCTTCTCAAGTTGAAGAGATTCCAAAATGA  
>CsCML25

ATGGACAAAGAACAACAATACAAACGTGTATTCAAGACATTTGGACGTGAATGGTGACG  
GGAAGATATCGCCACCCGAGCT  
CCAAATTTGTATTGGTAAGATAGGTGAGGACTTGTCATTGGAGGAAGCAGAAATCGCG  
GCAGAGTTAATGGACTCGGATG  
GTGACGGGTTGTTGAGCTTCGATGATTTGGTTAAAGTGGTCGAAAGTGCTAATGAAGA  
AGAGAAAGTAAAAGACTTGAAG  
TTGGCATTTAAGATGTATGAAGAAATGGAAGGCTGTGGCTGTATAACTCCTAAGAGCTT  
GAAGAGAATGCTTAGCAAATT  
AGGAGAGTCGAGAAGTGTGACGAGTGTGAGTTGATGATCAAGAAGTTTCGACCTTGAT  
GGCAATGGTGTACTTGATTTTC  
AGGAGTTTCAAGACATGATGTCATGA  
>CsCML26

ATGGACAAAGAACAACAATACGAACGTGTATTCAAACATTTGGACGTGAATGGTGACG  
GGAAGATATCGCCACCCGAGCT  
CCAAATTTGCATCGGTAAGATAGGTGAGGACTTGTCATTGGAGGAAGCAGAGATCGCG  
GCAGAGTTAATGGACTCGGATG  
GTGACGGGTTGTTGAGCTTCGATGATTTGGTTAAAGTGGTCGAAAGTGCTAATGAAGA  
AGAGAAAGTAAAAGACTTGAAG  
TTGGCATTTAAGATGTATGAAGAAATGGAGGGTTGTGGCTGTATAACTCCTAAGAGCTT  
GAAGAGAATGCTTAGCAAATT  
AGGAGAGTCGAGAACCGTTGACGACTGTGAGTTGATGATCAAGAAGTTTCGACCTTGAT  
GGCAATGGTGTACTTGATTTTC  
AGGAGTTTCAAGATATGATGTCGTGA  
>CsCML27

ATGGAGTCTAATAAAGTTCCAAAATCTTTTGGATGTTTTCTCCTAAAAGGGTCTCGTTTT  
AAGGTTAAGTAGTTTTTCGTTC  
CAAGAGTAACAATACTTCGAACTCCACTTCTCCTACGTTAATGTCTCCTAGATCGCCGA  
AACCAAACACTAACAACAGAG  
AACAAGAGTTTAGATCAGTCTTTGCGCGTTTTGATGCTGATAATGATGGAAAGATTCA  
GCATTGGAGCTTCGGTCATAC  
TTTGGCTCCATTGGTGAGTACATGTCGCACCAAGAGGCTCAGGGCGTGATCGATGATCT  
GGACACAGATGGCGATGGCTT  
TATTGATTTTCAAGATTTTATGAGGCTAATGAAGGTGAGCAATGAAAAGGATGATGTGA  
AGGCGGCGTTTGAGATGTTTG  
AGTACGAGAAAGGGTGTGGACAGATTAGTCCAAAGAGCTTGCAAAAGACATTAAGTC  
GACTTGGCGATTCAAAAATTAT  
GATGAGTGTTTGCAAATGATTAAGATGTTTGATACTCATGGCAAAGGAGCTGTTGATTT  
CAATGAGTTTCAACAGATGAT  
GACGGCTTAA

>CsCML28

ATGGCACAAACCGACGTCGAAAAAGTGTTCAAAAAATTTCGACGTGAACGGCGACGGC  
AAGATCTCCATAACCGAACTCGG  
CTCAATCCTTGCCGCACTCAGCGGCGCCGTCACATCTGAAACCGAACTGAAATCGGTC  
ATGAAAGAAATCGACACTGACG  
GTGATGGATTCAATTGATTTTGACGAGTTTGTGCGGTTTCATAACGGTAACGGTGAAGAA  
GAAGAGAGTAAGGAGTTGCGT  
GAAGCGTTTGATTTGTATGATGAGGATAAGAATGGGAAGATCTCAGCGAATGAGTTGC  
ATTCGGTTATGAAGAGGTTAGG  
TGAGAAGTGTTCTGTTGAAGGATTGTAAGAAGATGATTCAGAGCGTTGATGTTGATGGT  
GATGGTTGTGTTAATTTTGAAG  
AGTTTAAGAAGATGATGAATAAGTGA

>CsCML29

ATGCCTGCGGGCTACAGCTGGGCCAAACCGCCTGCTATGACTCTTGTCCATCAAATCT  
TTCTATGGGTTGCTTTCCAAG  
ACTTGTAACCTCCTGCATTTGAAAGTTACTCTTGCCGTTGGACTATTCGGACATCTGCATT  
ATTCGTGCCTCAGCAACGTC  
TTTTCCATGACTCAGCTAACAATATTCTGATATTGCTTGCTATATTGTCCCTTCTGAGTAG  
ATGGGGATATCTTGAAAAG  
CAAAACAAAGCACAGCCAAACATTAAGTCATGTTTTATGGTAATATCTTGAAAAAGAAT  
ATTAATCTAACAATTGAGCAG  
TCCTCTGCGCCCAGTCGCAACCATTGAAACTCTATTGTTGGAATCAAAGACCTGAACA  
CAATTATTTTTGATAGCTGATA  
GATGCTGTTTTTACCATCATGTCAAGCAAATTTGAGGTTACAAAATCGAATGGTTGTG  
ACTGCCTGTTAACAATAGATC  
GACTTGTGTATAATTAAGGTCAACAACAGCACATGCCCAAGTGGTCGAAATGACCGAT  
AACAAGGCTAGGATAATCTTTA  
CATAGTAATCTAATTATGTCGCTGCGTTCCCGAGTTTTATTTTTGAAAAAAGAGAAAAG  
AAGTGAGAACAAATCAAATG  
ATCATTCCCTAAGTACTCGTCAAATGCATCCTTCCACATAAAATATCCGCATCCATTATCTT  
TTCTGGGCTGTTACATAAT  
AATAAAATTATAAGATATTACAACCCAATTATTTGTATATTTACATATATAGGAAATGTATG  
ATTGTAGGACATGAATAA  
TATTGTCGTTGAGATGAATAATCTCTATGTGATGTTCTTAATTTTATATTTCTGCTCCAC  
AAGAACACATAAAAGGATT  
AAATTGCTCCATCTCAGGTTTTGAAATTTGTGTGAAGATAAGATATGGTAGAAATTTGT  
GAAGATAAGATATTATGGTTT  
TGAGGATAAGAAATTTGTGAAGATAAGAAATTTGAGGATAAGATATGGTATATAACGTG  
TAATTTTTCTGGATAAAGGGT  
TTTGCTGGGGACATGTCCCCGAAAAAGGTCTGGCGGGAATTTCCCGCGAACAATAT  
TAACATGCTTTAGACTTTGGTC  
AAAGTTTGATAAAGGTTGAAAATAGTTTTGGCGGGGACATGTCCCCGAGAAATTTAC  
GTTGAATTTTGAATATCCGGTC  
AAAGTTTAATAAAAAATCAAACCTACTTTGCGCGGGGACACGTCCCCGGCGAAACATT

ACGTTGAATTTTCATTAACAAG  
TCAGCGAATTCATGTGCCACGTCAGATTCAGTTTCGTCGTTTAGTGACTTTCGCCGGCG  
ACTTTTTGTCCCCGGCAAAAG  
TCTCCTCGCCCGTCCATCCGATTGTTGTAGTGTGAATTCGTGTTCCACAATTTTTTTCAA  
GAAAGAAGAGAAGAGAAGAG  
GAGAGGAAATTTGGCTAAACTTCTCTCCAAAACTTTCTTCCCAAAGTGGGATGATTT  
GGAGAGAAGTTATTTTAGGAAG  
CTTTCATAAATGTAATTACCTAAATGACCCAATATAAATCATAACTTTTATATATAATAA  
AGGGTATAATTGTAAAATC  
ATCAGTTATCTCTTCTTTTCTCTCTTAACTTAGGAACATGATATAAAAAATAAAATTTTCAT  
TCATCTTCTCTTCTTTTCT  
GTCCATTTTAACTCTTCTTTTATTTTCTTTCATTTCAAAAACCTTGGGAACAGAGTGTTT  
AAGTGTACATTGCGGTATTT  
TTTCTTCCTTTGCATTGGTATTCTATTTATTCATAATGTTTCGCCAATCCCATACTTTTCTTT  
GCAGACTAACTTTGTGTA  
TTTGCTCTTACTTTCAAATGATAACCATAATAACAAAACACCCTTCAAAGATGCATGTTG  
ACAAGGACTTTATCATAAAA  
GAATCGATCTGCACACTAGCTTTTTGGTACGTGCCAAGCTAGAAAGATAAACAGCATAC  
TGAAAACACTTACTCTTTAC  
GTATGACTAGCTAGCGATCTTAGTTTCTTTCATTTGACATCCCAAAAATAGTGCAACAAT  
TTCTTGCCGTACATTATTTT  
TGTTGGTCAAATCAAGTGGATGGAGTATTTTTCGATATAAGAATAACTTGATGGTATATA  
ATCCGTTGTGATTAGATGGT  
ATGTCACCTGGAATGTATAGCTAGCTAGTCTCTTTTTATTTTTTCGATTCTATGATAGTTCA  
CTTAGTTTCTCAATGTTAT  
GGTTATGATATAATGACACCGGTCTGGGTTTATAAAATGTCTTAATATTACAAGGGACTG  
AAAATATTTTGTTTAAAATA  
AACTAATCTAAGACTATCCTAATTTTTAAATAGTGTAACCTTTGAGGATAATAAAGAATT  
TGATTCTTTTAATCCAGGCT  
CTTAATTAACATCCAAATTAAGGGAAAGAATAACGAATACCCCTTTATTATAAAACAA  
AGTGCATCTAAATGCACTTG  
TGTTTCGTGTATATATATAAATGAATCGACTCCTTGGTCCTAGCATGCAATTCAAAGCACT  
TTCTAAGACATTTAGCATAA  
AACTTTCTTAATTCTATTATCTTTTGTTAAGTATGCGAAAGGAGTGGCGTCTTAAACAGG  
TAGAAGCACCCCTTGACAGAT  
GATCAAATAAAGGGTCTAGTCAGCAAGTTTGACACTAATGGAGATGGAAAGATCAGTC  
GGAGGGAACCTGAGGGTAGGCTT  
GAAGAGTCTTGGCCTGCATTTTCGAGGCTTAAGAGCTATGGGTGCAGTACGTCATGCT  
GATGCTAATGGAGATGGCGTTA  
TTAGCGACGAAGAGATAAACGAGCTTGCTAAATATATTTCCAAGTGGGGAATTTCTGTA  
ACTTAA  
>CsCML30  
ATGCGGCAGTCCTGGTGTCTTAGACAGGTAGAAGCGGCGCCCCTGACAGAAGACCAA  
ATAAAAGGTCTGCTCAGAAAATT

CGACGCAAATGGTGACGGCAAGATCAGCAGAAGGGAAC TAAGGGCTGGCTTGAAAA  
GCCTTGGTCTACGTTTCGCGTGCT  
TTAGAGCTAGACGTGCACTGCGTTATGCTGATGCTAACGGAGATGGTGTTATCAGCGAT  
GAAGAAATAAACGAGCTCGCC  
AGATATGTTTCCAAGTGGGACATTTCTTTAACTTAA

>CsCML31

ATGACGCGAAAGTCGTGGTGTCTTAAACAGGTAGAAATGCCCATGACGGATGACCAAA  
TAAAGGGTTTAGTCAACAAGTT  
CGACACTAATGGAGACGGAAAGATCACTCGGAGGGAACTGAGGGTAGGTTTGAGGAA  
ACTTGGCCTACGTTTCGCAACCT  
TTAGAGCTATGGGTGCAGTACGTTATGCTGATGCTAACGGAGATGGTGTTATTAGCGAT  
GAAGAGATAAACGAGCTTGCT  
AAATATATTTCCAAGTGGGGAATTTCTGTAAATTAA

>CsCML32

ATGTCGCTTTCGGAACAATTCATATCATAGGTGACTTGCGATGTATTTCCACACAATTT  
TCCAATTTATGTCTACATAA  
AGCAAAGGTTCCAACATTCTTCGTCGTGCCATACTAAGTTAACTACTAACAATTCTAGA  
TTTTAGAACTAACAAAATGA  
TTTTCGTGTATATGTTTCATATCTTTCATGGTTATTGAATGGTTTATCTTGTTACATGACTTG  
TATTCGCTTTTTTGCTCGT  
CCTTTGTTTCAGTTTATCATTGACACACCCCCAACAAAGACTTGACGGCAGCCACAG  
CACACGAAAAGGCTCATGCAAC  
GAACCTTGAGGTGTTGAGAATGGCCCGGGTAAGAAGAAGGCGTTGGGAGTGAATCC  
AAAGACTATGATGGAAAGATTGG  
GAACGTTTTGGGATCCTGATGACCATAGGGAGGCTCTTGATATGGACGAAATGGTGAAT  
TTGTTTGTTGAGGACGAGCCA  
AGCTTAGATGAAGTGAAACAAGCGTTTGGCGTGTTTGATAAGAACAATGATGGCTACG  
TAGATGCAAAAGAGCTACAAAA  
TGTGCTTTCTAATATGGGCTTTTTACATATATGTGAAAGTGATTGTAGAAGGATGATTGT  
TAGCTATGATGCTGACAAAG  
ACGGTAAGCTTAGTTTTCGCGAATTTTGAAGGTCGTGGAAGATGGCTTTTCGGTAA

>CsCML33

ATGTCAACATTGCCCCGAGGACCAACTCAATCAACTCAAAGAAATATTCACACGTTTCG  
ACCTAGACAAAGACGGGTCCCT  
AACACATCTAGAGGTTCGAGCCCTCCTTCGGTCTCTTGGCCTCAAACCATCTGGAGAC  
CAAATTCACAACTATTTAAAA  
ACATGGATTCTGATGGCAGTGGGACCGTGGAATTCGACGAATTAGTGAATTCCATGTCG  
TCCCATATGATGACTGAAGAG  
ATATTGGTTAATCAACAACAACCTTATGGAAATATTTTCGATCTTTTGATAGAGATGGAAGC  
GGGTTTATAACGCCTGCTGA  
GCTAGCGAAATCTATGACGAAATGGGACAACCTTTAACGTATCGCGAGTTGTCTGAA  
ATGGTTCGAGACGCGGATACGG  
ATGGAGATGGTGTTATTAGTTTTAAGGAGTTTCAAGGGATTATGGCTAGGTCGGCAGCT  
GATCACTTGGGTTCTCATTG

TAA

>CsCML34

ATGGTTGTAGTCCATCTAGATCCAATCCTGATCCAGTAAGATACACAATTCATTAAAAAT  
AATAAATTTGTAGATTTTGT  
TTACGTTATTTTCTAGTTGACCAATTTTTTAAACCTTCATTTCCAAAAAAATTACAAAATTC  
AGCAAATTTTATAAACACAA  
ATTTTTTCTTTCTACATTTTTTAGTTATAATCCCGGCAACGATGGGCGCGGGCGGCGAGCTC  
GTCATCATCGGTACTTTTCCT  
CTCTCTTATATAAAACAAGTATCCTTATGGGGTGTTTGTTCGGCTTACACAGCGGGCTTA  
TGGCTTATTTGGTTTTGGGC  
TTACGTTTCGGAAAGGCCATTTTTTATGGGTATTTTGAAAACTTTTCGGCTTATATAA  
ACTTATTATTTGTCATAATA  
AGGTTATATAAATATAAGCGAAAAGTTTCAAATGACCCACAAAAAGTGGGCTTACGA  
AACGTAAGCCCAAACCATATA  
AGACATAGGCCCCGTATATAAGCCAAAACAAACACCCCCGTATGTATGTATGTGTATG  
AAACTGTGTATGTGTATGGGA  
CTGAAAATGTGAATGTGGATTAGGAAATATAGAGATCGAGCTCGCGGACATTGGGTGTT  
TGTTTTGGCTTATATAGCGGG  
CTTAAGACTTATTTGGTTTTTCGGCTTATGTTTCGTAAGCTCACGTTTTGTGATTCATTTTG  
AACTTTTCGGCTTATATA  
AACTTATTATGTGTCATAATAAGCTTATATAAATACAAAGCCGAAAAGTTTCAAATAAC  
CCACAAAAAGTGGGCTTACA  
AAACATAAGCCCAAACCATATAAGCCATAAACCCGCTATATAAGCTTAAACAAACACC  
CCCTGTATGTATGTGTATGCA  
AATGTGAATGAGTATGTGTATGTGTATGGGACTGAAAATGTGAATGTGGATTAGGAAAT  
ATAGAGATTGAGCTCACTGAC  
ATTGGGGGAAAAGTTATGTGCGGCTTTGATACCATTTGCGGTTTTAGCTGAGGTGTTGA  
TTTTTCAGCTTCTCGTCTTGTT  
TTAATGATCGAGGGAGGAAAGCAGCTAAACCGGCACTGACTTTTGATGACATTAGACG  
GCTGGCTCTTAATTCGCCATGT  
TAGTTTATGTTTATTTCTTTTAGTAGGTTTTGTTGGTTTAGGATTTATTAATGTTGTTTGAA  
TTGTTTCAGTTACGGTTA  
ATGAAGTGGAAGCATTGCGTGAATTGTTCAATAAGTTGAGCAGTTCGATTATAGACGAT  
GGACTCATACACAAGGTATGT  
TTTCTCATTTGATTTTACCAAATTTTCGTGCAAAATGCTTGGTGGTGCAAATATGATTAC  
CGACTTGCAATCCACTGATG  
TCTAATGACAATGCATAATACAGACTAATCAATGAATGTATGTAGAACAGTAGAAGGAT  
TTAAGTTGAGTTAACGTGAAA  
CAACATATATTTGCGATAATGGAAGTTCGTCTGATGAATAATACGATGTTAATAGAGGCT  
AGGGAATACTTAATGGCATT  
GTGAATCATTAGATTCGTCTGACTCTTATGAGCATTACTCAGTTAGTAGACAAAGGCATA  
GCACTTATGTTCAGAACAGA  
GGAGCTGCCATGAGCAAGTATATACTTACCTGTGTAGTAAACATCTTCGTGAGACTAAA  
TCTGACTGCTGCATCGCTATA

TAAAATAGATATGTAGAAACAAGACCAAATTGTTGCTAATGAAACACAGTTTTATCAAT  
GCACGTCAAGATTAACATGAT  
ACAATGATACCACATTCCTCATCTTATCCTTGTTTTTCTTAACAGGAAGAGCTCCAATT  
GGCGTTGCTCAATTCAGCCG  
GTGGAGAAAATCTTTTCTTGAACAGGGTAAATCCTTTATTACATTCCATGTTTCCATCTT  
AAAGCGGCTTTACATTAAAA  
GTTTGGAATGTAAATCGGTACCCTATTGACCTATTCTGCTGACAATTAATCAAAGGCTTT  
GCCTTGCAAATAAACTCTGA  
AAGTAGAACAGTTTGTAGGTCACATGATGTAGTTTTGTACCTAAGCCAAGCTTAAGGA  
ACGTTTCTGTTGATACATATAT  
GAATGCTTACTCAGACAGAATTGCATATACAATAAGTTTAAGGCAATGGTGGTGTGAG  
GTCTTGAATTCGAGGAGTTTA  
TTCTTGATTGAGCATCTTTCATCCATTTGTAGGTTTTTGATCTATTTGATGAGAAGCAA  
AATGGCGTTATTGAATTCGA  
GGAGTTTATCCATGTATTGAGCATCTTCCATCCTTATGCCCCAATAGAAGAAAAAATTGA  
TTGTAAGTTCTAAGAACACA  
ATCCACATGAATTAGTTTTGCAGGTGTCTTCATGGTATGGTACTGTCTTTTCTCATTTTTT  
TCCATTTTATGCAGTTGC  
CTTCAGGTTATATGATTTGAGAAAAACCGGTACATAGAACGGGAAGAAGTAAGTGGT  
TGATCTGTTTCCTATATTAGCT  
CTGTCTCACATTCATTATCATTAAATGGCGTCTTCTTATATCAGGTAAAGAAATGATTGTT  
GCCACTTTAAAGGAAACCG  
GGATGCGTCTTTCAGAAGAAATACTTGAAGAGATAATTGATAATGTAATACTTCTTAAG  
GTTGATTACTTTTTCTTTTTC  
TTTCTAAGTTAACAGGCATTCGTCTTGTGTTTTTGTGTTCTCAGACATTGCGAGATGCAG  
ATGCGGACATGGATGGAAGA  
ATCAACAAAGAAGAGTGGAGGGACTTTGTTATCCAACGACCCCAACTCTTGAAGAAC  
ATGACCCTCCATCTCTTAGGTA  
CAATTTTCTTTTGA CTGACATTCAGTCATCGGTTGAAGACTTTGATATTTGTTAATGTGT  
CTAGTTAAAAGTTACATTTT  
CTAGAGAACTTTTTTTTCGTTTCATAAGGGTTTGTTTTAGTTTGAAGATTTTGTCTT  
TTTGTCCATTTGCTAGGGAT  
GTGACGACAGCCTTCCCAAGTTTTATATTCAACACAGGAGTAGATGATTGA  
>CsCML35  
ATGGATCCAGCTGAGCTACGCCGTGTTTTCCAAATGTTTGATCGCAATGGCGATGGCAA  
GATCACAAAGCAAGAGCTTGC  
AAAATCTCTAGAAAACCTTGAATATACATCCCGGATGATGACCTAGCCCAAATGATCG  
AGAAGATTGATGTCAACAAGG  
ACGGCTTTGTGGACATGGAGGAATTTGGTGAGCTTTATCAAACAATATTGGGTGAGAG  
GGACGAGGAAGAGGATATGAGA  
GAGGCGTTCAATGTGTTTGATCAAAATAGGGACGGTTTTATCACCGTGGAAGAGCTTA  
GGTCTGTTTTGAGCTCGCTTGG  
GTTAAGGCAAGGCCGTCTATCGAGGAATGTAGGCTCATGATAAAGAAGGTGGACGAA  
GATGGTGATGGAATGGTAACT



ACAAAGAGTTCAAGCAAATGATGAAAGCAGGTGGTTTTGCAGGCTTGGAAACTTAA  
>CsCML36  
ATGTCAGGCTACCCTCAAAACCCCTCAGGCTACGGCACTCCACCCGCCAACCTTACG  
GTGCCCCACCCAACAACCTTA  
CGGTCAACCCCTCAACAATCCTACGGTCAACCCCCACCAGCCCAACCCTACGGCGCA  
CCACCTGCCAACCTTACGGTG  
CACCTGCACAGCCCTACGGTGCACCCGCACAGCCTTACGGTGCTCCCTCAGCCCCATA  
CGGCCAAAACCCAACAAACCT  
CCTAAAGAAAACAAACCACAGGGAAGTGGTGGGTACGGTGCTGCTCCTCCACCTGGT  
GGCGCGTACGGCCAGGGAGGGGC  
GCCGTACGGGAGTCCGTTTCGCGGCGTTGTTGCCGTGACGTTCCCGCCAGGGACTGAT  
CCGAACGTGGTGGCGTGTTTTT  
AGGTGGCGGATCAGGATGGGAGTGGTGTGATTGATGATAAGGAGCTGCAGAGGGCTTT  
GAGTAGCTATAATCAGAGCTTT  
AGTCTCCGTACTGTTCAATTTGCTCATGTATCTTTTACCAATACTAACACCAGGAAGATC  
GGTAACTATCTATTCTTTTT  
TACTTTTTACTATTTCTCTCTCACATGGTAGTAAGGTAATTAATTAATTACACGCGTTGGG  
GTAAAAGTGAAACACCACC  
GCGTATATATTTAGTACAAGTCGTTTTAATTGGACGTAAAGCATAAATGCTAAAACGCGT  
GGGGATGGGGCCAACTGGT  
TTTCATCCACATTTAAGAAAACGTGATATTAAATTATTAAGATTTTCTTTTTTTAATCTG  
CGTGTCAAGTTAATTACCA  
AAATTAGCGTTATGCAGTGAAAATATAAAATCTATGGTTGTGATGTGGGCCCTGTATTAG  
ATGAACCACTTTACTACAAG  
TGTGTGACGTGTGGGTTTGAATTTAGCCTCAAATATCTGATGACTATTACACGACAAAA  
TTTTAACTTATTTTGGTAGTA  
TTGTTTAAATAATTAAATATAGTAAGCAGATATTGGAGGCTAGCAAGTCATAGCAGATTT  
TGGATCAGTTAAAATAACTA  
GAGTGAAACTATCTTGGACTTTACTTAGCAATGGGAACTTTTGACTTATTTCTGACTTTG  
ATTATAACCATGAAGACACT  
TGTGTAATAATGTCATTTGCTTTTGAAATCTTTTCAAGAAGGCATTATTTGGATGGTCAA  
TTGGTTCTGACCCAGCTCAT  
TATCAACGTGTCATTTACTCATTTTGGCCCGTTACAGTCCATAGTGCATTCTTTAAGAAA  
AGATTGGACGTAATGACAGA  
CTTTTGAATCATTGAAATGCCATCTATATTTTATTATTTTATCATGACTACGGGTTTTTAT  
CTTTCTAAAATATATTTA  
TAAGTATGGAAGTGTGATGCAATCTATATATTACACGATGGTTAAATGACAAGTAAATA  
TGACCGTGTAAGTTATGGTA  
ATGGCTAGTTTCTGTATTGACTTCTTGTGTTCTTTATGCTATCAGGACCCAAGGAGTTC  
ATTCAAGTTTTCTACAGCTT  
GCAGAACTGGAGGGTGAGTCTCAACAGGAATTTCTCATTATTGTTTTGAGTGTCTAC  
CCATTATTTTATAGATCAGTC  
GTTATTAGGTTATGGTTTACCTTTAAACCCGATTAAATTAAAGAGTTTAGCTAAATAAGT  
TATGGGAGAATTCAGAATTG

TGTCAAAAGTGGTTGAAACTTGAAAGTAGCCTTTTCTAAATTGTTTTATTTTCATTAT  
AAAAGTTATTATCATAATAA  
CATCCTTCTTATAACCATATTTAACAGATTATATAGTTATGGAAAATGACCAAAATATGTC  
GTGGGTCAAATCATACTGA  
CCCAATTAGTAACCTGTAATAAGAACGGCTTTTCTAACCTAATTTTTTACAGTGACAAC  
GTGACAAACTGATGGACATG  
GTATTTCTTGACGTTTTACAGGCAAACCTTTGAGAAATTTGACAGAGATCGCAGTGGCA  
AGATTGATATCAATGAATTGC  
GAGAGGCCCTCATGAGCCTTGGCTTTGCAGTTTCACCTGTGGTTTTGGATTTGCTAGTG  
TCCAAGTTTGACAAGAGTGGT  
GGAAAAACAAGGCTATTGAATATGACAACCTTCATCGAGTATGTTTCTGGAAACAGATT  
ATCTATATATATCCTTATACA  
TTTGCAATTTTTTTGGTTAGTTGTCTAATAAATTTACGTTTTGTGATTTACAGGTGCTGC  
TTGACTGTAAAGGTATGTAA  
CAAATGTTTATGTTAAAAACAACCTGCTTTGTTTGGTCAAACATAGCATGCTAAGCTCGA  
CTACTACATTCGTTGTCGTCT  
TTTCTCCTTTATATATGTGATTTTTTTATCAAGTATTCTTTAAAAATTTAGCAGTTTGGCA  
AAGTTTTGAAATTGTAAAG  
ATGGTTGAGTGTAATAATTCCAAGTGTCCTTACAGTCGTCTATGAGTTGCAGAATAGCAG  
AGTGAGGAGATTAAAGGATTGG  
TTCGGTAAAGGGTCAATATGGGATAATTTAATAGAGTTGCGATCAGGTCATGGTTGTA  
AATAATTAATGTGTTGCAA  
ACTAACCTCGGAACTTTAAGCTTCACCCACTTGGCTAAAATAACAACCTCGACCCTTAT  
GCACTATAATGAATTATTGAA  
ATGTATGCTAAACAGCTACGAAACATTATTCTCAAGGTGTGTTTTTTGGTGATTGCAGG  
GCCTAACAGAAAAAGTTCAAGG  
AGAAGGACACATCGTACTCAGGGAATGCTACCTTTACGTATGAGGCGTTTCATGTTGACT  
GTTTTGCCCTTCCTCATTGCT  
TAG

>CsCML37

ATGAAGCTCTCCGGTAGAATCAACCCAAAAAACATCTTCCGATCCAAAAGCCACAAAA  
AAGACTCCGTCTCCAGATCCGA  
ATCCTCTTCATTCAGCTCATCCATTACGACGTCGTCTGGTTCACCAGAACGATCAAAAG  
GGGCCACAACACCAACAACCTG  
TCTTACCAACACAACCCTTAACAAGATCTGACTTAGAAGCTTTGCTGCGCCGTATAACC  
AATGATGAAGCTGAAGTTAAG  
TTAATGCTTGATGAAGTCGAAGGTGACGGTGAAGTTGAGGGAACGATGACGGAGTTT  
GGTGAAGAAGAGATGAGAGGCGC  
CTTTGAGTTTTTTGACAGTGATGGCGACGGAATGATAACGGCGGATGAGCTGTTTCAG  
GTTTTTAAAGTGATTAATGGTG  
ATGATGGGTGTACGTTAGAAGAGTGTAAGCGTATGATAGCAAATGTTGATTTGAATGGT  
GATGGGTTTGTTTGTTCAT  
GATTTTGCCCGTATGATGGAGCAACGTCATATCTGAACCGAGAAATGATATGAGTACTA  
AATTTAAGTTTAATCTTGTGA

CTAAAATATGTGTGGCACAACACATACTTTAGTAATGAAATTAGGCATGAATTATACTAG  
TAAAATTTAATCGTATGGCA  
TGTGAATTTTAGCAGACATGAAAACAGTTATTCGTGTATTATTAGATTCTCTGAAAATAT  
GGAGTTTAATATTGAATCAA  
AAGACAAATATTATATTCTTTGAATTTATTTGTGTTGTTTTGAGTCTTTTATTATTTTTATT  
ATTGTGGGAATATCGTGT  
GGGTGGTGTGTGTCCGTTGGTTGTACGTTAGGTTGGAAATATGGACGCTTTTGATTAT  
GGGGTTGATATTCACATAAAA  
ATAAGACTAAACTCCAAAATACATTGTTTACAGTTTCTGAGACCTTACATCTTTTTCAGA  
AATTATTGGCTAGTTACATC  
ATTCGTTAGCCAAACGTTAGCCATTCTACATATTTGGTCACTAACTCTGTTAGTTTTCTT  
CGTTAACTGCTAACGGGAGT  
ATAAAGGAGGGCTGTTTTGGTCTTTTTACTCATATAAATGATATATTTTGCAGTTTACTCT  
TTTACATATAAGAGGGATG  
TATTTTGCAATTTACTTTTATACTTTACTTTTTTTTTTAATTATTATTATTATTCATTCATATTT  
TATTTTCTAACATTTT  
CATTCGTTTTTTCTATTTTTATTTGTTTTTGCCGGTTTTTCATTCATTTTTGTGTTGTTTTTT  
ACATTTTTGTCCGTTTTT  
TTTATATTTTGTCTGTTTTTCTTACGTTTTTGATTATTTCAAAATTTAAAAAAAAAATCA  
AAAAAAAAAATTTTTGAAA  
CAAATTTTCTAAAAAAAAAAATTGTAATTTTTTCGCAAATTTCAAAAAAAAAATTTCCAAA  
AAAATTTTGAAAAAAAAAATT  
CTATTTTTTTTTTCGTAATTTTTTTTTTTTGAAAAAAAAAATTTGAAAAAAAAACAAATTTAG  
AAAAAAAAAATTTCCAACTTT  
TTTTTCGGAAAATGTTTTTCAAAATTTTTCTGGAATTTTTTTTTTCAAATTTGCGTAAAA  
ATTCCAATTTTTTTTTTTGGA  
AATCTTTTTTCAAAATTTTTTTTTTTTGAAAAAAAAAATTTCAATATGTTAAAATAGTACAAA  
AACAAACAAAATGTATAAA  
AACATAAGAAAACAGGAAAAACGAAAAAAAAAGTACAAAACAGAAGAAAACGAAA  
AAAAAGGGCAAAAACAAGAAAAACA  
TATGAAAGCATATAAAAACTGATGAAAATGAATAAAAATGTACAAAAAACTGAAAAC  
AGGAAAAAAAAAATGGACGAAA  
CGAAAAACATACGAAAATGTATAAAAAAACGGACGAAAACGAATGAAAACAAAAT  
ATGAGTGAATAATAATAATA  
ATAATAATAATAATAATAATAATTAGAAAAAAAAAGTAAAGTATAAAAGTAAATTGCA  
AAATACATCCCTTTTATATG  
TAAAAGAGTAACTGCAAATACATCCCTTATATGAGTAAAAAGACCAAACAACCCT  
TCTCTATACTCCTGTTAGCAGT  
TAACGAAGAAAACAAACAGAGTTAGTGACTAAAGATGTAGAATGACCAACGTTTGGTT  
AACGAAAGATGTAAGTAGCCAA  
TAGTTTCTGACAGGGATGTAAGGTCTCAGAACTGTAAACCACAGGGATGTATTTTGTA  
GTTTACTCTAAAAATAATTTG  
ATTCTCATATCATAATTATGCATATATTATGTTGTAACGTGTGCAATTTTATGTGATATTGT  
GATGTATGAATCATTTT

TTTTGTGTGATTATCAACTCCCTTTTGATTAGAGCAAAGGCTAAATAAACTCTTGACGTT  
TTCATTTTGCACCCTCGATA  
GGTAGATGGAAAGATGGATTTGACTAGCTACTACTATATTTTATAATATGTAAGTTCATAT  
ATGAAAATGTTTTTAACAA  
GTGGCTTCACGGCATCAGTAGTTAAGTGTATTAATTTAATATAATTTTTTTTTTTAAATTA  
AAAATTACATTTAATGCAC  
ATCAGTAAATGTTATAAACAAGGTGGCAAGCAAAAGTAATTTTTTAAATGTTGGGGAA  
AGTGCCGTCGGGCAATGTTTTA  
TCTACCTATACTATAAGGAAGAAGCCTCAGGTTCTTCCAAAAAATGCCACATCAGCATT  
GAACAGTTGCACACTGTTTTA  
TCTTTGAAAGTTTTGGTTCCTTATCTACCTAATATATGTTAGAAGTCATTTTATTTCACTC  
ACACCGTATCTCTCTGTCA  
ACTCTCAAGTTTTAACCTCTGTCTTGCCTGGTAGCCATATTCCGGCGACACCATTTTACA  
ACCATGATAACATCATCTTT  
TACATGTCTGACCACCACTGATTTTTCCGGCCAGCCACCATACATATCCAGTCATTGCTT  
TCATCTTCTAATCTTCTACA  
AATATCTATATTCAGGTTTGTTTAGATTTTCATCATCCTATTATTAGAACTACTGACAAATC  
ATATTAAAGGATCATTTGT  
TGTTATTCTAAACTTTTTGTTGCTGATTACGGCAGATGTATACGGGTCATTTCGACATGTGA  
AAGGTATCTATTTTTTCATG  
CTTTTTGGGTTTGTTTTTATAGGTATGATTTTTTTTGGTTAATATATGGGCTCAGTTTTGTA  
ATTTTTTTTAGGTGCTTT  
TTCATATAGTGGTGCTATGAACTTGAGCATCATCTTTTTTCCTTCTAATGTACTAACTTGA  
GCATCATCTTTATTTCTTT  
TATGACAGTTCTTAAAAAAAAAAAAAAAAAAAAACTACGGTTATAATCTTTTGTTGTTG  
TGTTTCACTACATCTATTGTT  
ATTGTTTAGATATTTTAGTTAAATTTTTTATGACATATTTTTTATTGATGGTATTTATTTTT  
CATGATATAGGTACTTT  
GAAAAGAGAAAGAGAGTGA  
>CsCML38  
GGGGTTTTATGGAGAATCCAGGAGAGACAAATCGAGAGGTCGTCATCATGGAGTTACT  
CAGCAAGTAAAGCAAGAGATGA  
AGGAAGCATTCGAGCTATTTGATACTGATGGCAATGGTATGACATGAACCCAATGAACT  
CTTGTTATTTGAGTGAAAATG  
ATTTAACTTGTGTGGATTCTTACAAATATAGGTACCATTGATGCTAAGGAGTTGAGCAA  
TGCAATGAGGTACGAGCATC  
ATTTAAATGGAATATCTTATGATATAGGATTATGCATACAATGATACATCGTTATTATTCA  
TTTCAGGGCCCTTGTTTT  
CGAAATGACAAAGGAGGTAACATCCAGCCGCCAGTTATTTTCCTTCTTGTTCTTAATTT  
ATTATAGTGTTTAAAGGCTGT  
CTGGAATTACATATTGAACTAATGTTGGGTTTATTCAACTGTTCTTCAGCAACTTGATC  
AGATGATAGCGGATGTAGAC  
AGAGATGGCAGTGGTGCAATTGATTTTGATGAATTTGTGTACATGATGAGTGATAAAAT  
TGGGGAAAGGAGCAACAAACA

GGAGCTTACAAAAGCATTCAACATTATTGATCATGATAAAAATGTAACCTTCTGTATCAA  
TGAAACTTTGTCTTACATTA  
GAAACTAATGTTACTCTGGTGGAAAACAGGGAAAGATATCAATTTTGGACATCAAGAA  
TATTGCTAAGGAGTTGAGTGTA  
CGCTTTACCGATGCAGAAATTCACGCAATGGTGGAGGAAGCAGATCGTGATGGTAAGT  
TCATGTAGTTTTTCGCTACATGC  
AACTTTACGTTTACTAGAGGTGATAAAAATGGACATGTCAAATTGGGTAAATTAAAGTAC  
AGGTCGGTCAACTCGCAACCC  
TTTTTGGCTTTACAATTGATTGATGTAACTAATATGATTATAGAGTTCTTGTATTGTGT  
AAGGAGTAACTTTTGACCC  
ATTTGACCTGTAAGAATAAAGATATACTTCACATTGACCCATGTCCTGTTTAACCATTTA  
GCTGTCCTCTCAACCAAACA  
ACAGAATAGAACTTGTGGTTTCAATATGTGTGTTCTGTTTACCAATATTCAATATGTTATT  
TATGTTGATCAGATGATGG  
AGAAGTTAGCAAAGAGGAGTTCATGAGAATGATGCAGACAACCTTCTTATGGATATTAG  
>CsCML39  
GGGGGTTTACGGAGAAGCGTCCAGGAGAGACAAGCCCAGAGGGCGTCATCATGGGTT  
GACTCAGCAGAAGAGGCAGGAGA  
TCAAAGAAGCATTGAGCTATTTGATACGGATGGCTCTGGTATGTTTGTTAATATTAAGG  
CTTTGGTTTGGGGGTGTTTA  
AGTGGATGTGTGATATTGATAATAAGTTGTAATAAAAATGGGCTGTAAAAACAATGTTT  
GAATATGCTTATGTTGTTTGA  
CGGTGTAATAGTAAGATAATCCGTTGTTTGAGTGATTGACAAGCTCTGATTATTCAAGA  
CATTTTTTAAGGATAATGACA  
AACAAGACTTGTTGTAAAATGAATGGAGATGGTTTGACATTTTTTAAGAAGGTGTAAAT  
AAGTAATTTTGTTTTGCCCAA  
ATGATTATTTTTGTTGTAGCATGTATGAACTGATAACGTAGAATGATCAGAAGCAGAAT  
CTGTTTATCCAAACATTAAA  
AACTGAATCAGTTCGAAATGCAAATTCAAACACTTTTAATCTGTGGGATTTCAACTTGT  
CTGATCTGAATCATTAACTAC  
AGGCACCATTGATGCTAAGGAGTTAAATGTTGCGATGAGGTATGACCTTCAATCCTACC  
TTACCATGAAAATCTTATATG  
GGATTATGAGGTATTGAATTATGCTTACATTGATACCTTAATTTGATTTCAATTCAGGGCC  
TTGGGTTTTGAAATGACGG  
AAGAGGTAATATCTAACTGCCAATGGTTTTTTGTTTTTTTAGAAAATACCGTCTTCATT  
TATTAAAATCATTCCTACCA  
GCTATCTTCTTTATTCTCTTTTCCCATGGAACCTTGTGCCCCAATGATTTTCTAAACGACA  
AAATTCTCTAGCAGACAGTA  
TTAATTAATGGCTCTGCTTCCACCAGATTCCTCCAAAATATTGAACATATCTGAATCAAA  
GAAAAGTGGTTGCCCCCTGT  
TTTCCTTTTCTTAGCTTACTGAATCTTGTTTTGCTGAAAAAAGTTGCTCCTACGTGTAGC  
TCGTTTTTGTTGCTATTCAA  
CTGCAAGTCATTCCTTCGGATTTCATCTATTACACGTGTGAATGTCCTGCCTTCTTTTTTT  
CAGCAAATCAATCAAATGA

TAGCAGACGTAGACAAAGATGGGAGCGGTGCAATTGATTTTGATGAATTTGCATACATG  
ATGACTGCCAAAATTGGTGAG  
AGGGACAGCAAACAAGAGCTTACAAAAGCATTGAAATCATTGACCAAGATAAAAAAT  
GTAACCTTCTATCAGTTTTAAAA  
TTAGTGACCATTGTTGTTATTTTACGTCAGAACTAAATTTACATTGTTGCACTACAGGG  
GAAGATATCCGTTGCTGACA  
TTAAGAAAATAGCTAAGGAGTTGGGTGAACATTTTACCGATGATGAGATTCACGAGATG  
GTCGAGGAAGCAGATCGTGAC  
CGTGAGTTTCTCTAATCTTTCTGACTGCATCGTATGATTAAGTAAATTTAACTTTCAAC  
TTGGGGTTTTTCTCTTTCCA  
CCAATTACCAAGAAACCCTTTAAATGCGTGGGGCTTTTGTGTTTGTGTGATGTTGCGT  
TGCATTAAATCTTCAATGTTA  
TGTTTGGTATCTGATTTGTTTGGGCTTAATGGTTGCATTTCTTTGCATTGGACAGATGAT  
GGTGAAGTCAGTGCAGAAGA  
GTTTATGAGAATGATGAAGAGAACTTCATATGGATATTAA  
>CsCML40  
ATGATCTATAATTATTATAACAAATCGTTCGAAAACTATCATTTTTTTCCTTCGAAACAAC  
GTCTATTCTAAGATGGTGA  
CATATTTTGAAAGTAGTAGTGACTGGTGAGGATTTTAGAAGGTATGGTGGGTTTTGAAT  
AAATCGACGAACCCTAATCGG  
AACCAAAGAGGGATATGCGGTTTACATGATTTTTTTTTATTTTTTTTTTTCAGATCTATCCG  
GTTCTTTCTTGCTTTTCTC  
AACAAGGAGTGATATATTCGAACCTCCAGTTAATGATGGTGAGCCAGATGGAGTTGATA  
AAATTAAGTATTTTTTTATTT  
TCTTTTTGCTATTGATATGGGCATTTTTTAGTGATTTCTTTATTAGTCTTTGTTTATCTTTTT  
TGCATAGCTAAGATGCAA  
ACAGGTGTGATAGAGTGGTTGAATAGAAGTCTCCAAATCTTATTTGTTTGTTAATGCTTT  
GGATGAAGAGTTTAGAATTC  
TTTAGTTGATGGTTCTATTCTTGGTTGATTCGATTTTGATCCAAGCCTTTTCAATTTTTC  
GTAGATTCGGTTCTGGTTT  
TTCATTCTTTAAACACTACACGTTTTTGTATAAATAATTAGTAATTACTTATTTTTGAATC  
AATAGTTACACAAACAAAT  
CGGTGTATCAATCTATTTGGAATTAGATCTGATATTTTTCTCGTTTCGGGTTGTGTATCAA  
GCGGTTTTTGTTGACAACA  
ATTGATGAATCAAATGGGATTATTTTTATGAATGTATTTTGTGTTGATTATTCATTTG  
TATGTTATAAGAGTTGCT  
CCTAGTTCTAATATTAATTAGTTAATTATGTATTTGTTTGTGTATTACATGGTTATAAATATA  
GTGTCGCATTATTGATG  
AAGCAGACAGAAGCCTTCTGACAAAGATGACAAAGTCAACAAACATATGCCATTACCA  
AAACTACGTAGCATTGTCTAT  
AAAGAATATGTTATTTAATTATGAACTAAATATTTCAAAAAGAACTCATTCGTCCTACTAAA  
AATATAAATATGTCATAATA  
ATTAGTGTGTTAGTACAAACGTATTTAAAAAAAAGTTGTGTGTCATTATATATTTGTCAA  
GAAAATTTGTGTGATAAATA

TAGCGTGTAATTACAAATGTATTAATAATTTGTAGCGTGTAATTGAAAGTGAATAAAATT  
TTAATGAGTCACTATAAATG  
TATCAAAAAATTTAGTGTCACATATATACAAAAAATTTAGTTTGTCACATATACTAT  
ATATGTATCAAAAAATTTA  
GTATTACATTACAATTTGTCAAAAAAAAAAAAAAAAAAAAAAAAAAAAAAAAAAAAA  
AAAAAACTAGTGTGTCAATGCA  
TTAGAAAGTGTGCACCAATATTTTAATTATTTCTTTATCGTGTAATAAATTGTGTATCATA  
CGGAGTATGTTTTAGTTAA  
CAAATTATGTATGGCCAATTAGAGCTTTTGAAGTCGTGTATTTCTTTTAAATACAAAAG  
TATTTATTACAGTTAGATGT  
GTTATGTATCACTATTTAAATGAAAAAATGGAATTACAACTCTAGCTATACGTAAATC  
TTAAAGGTGCATGCAATAAA  
ATATTTATATTTTGGTTAGAAATTTAATTAAGCATATAATTTTGAATTAATAAAATATA  
CTGAATTTTGAAAAAAA  
AAAAAAAAACTGGGTCAACATTTATGTCTATTTCTCCATTCAAATTAGTTTTATTAAATT  
GGAAGTTGGTACATAATACC  
ATTAGTTTTTTAGTTTATTACAATTAGGCCATTACATTAATTAATTTGATTATGATCTTTA  
GTGGTTGATCCAATGGAC  
CACAAGAGTTCTTATTGTTCTTATTATAAGGTGGTCATCACAATAACGTTACCCTATATAT  
ATATATATATATATATA  
TATATATATATATATATATATATATATATATATATATATATATATATATATATATATAT  
ATATATAATTG  
TTACAAGTGTCACTACTATTCATATCTAGCTACATTAGATTAAAATTTGATACAAAA  
GATTTTTAAATCTTAAATAG  
AAACGTATTCACCCCTCCTTTTTACGTTTATATATATAGAGAGAGAGAGTAAATTACACC  
GTCGTCTTGTGGTTTGCG  
TTGACCGCAACCTTTCGTCTTTTGACCCAAAAAATGCGCCATTTCGTTCTTAAGTGGCA  
AACGTTATGCGCCGTTTCGTCC  
CTCCATCCAACCTGGCCCCACTAACTCCCACTAACGCCCCGTTAACTAAGGTTTTTAAAGG  
GGTATATACGTCATTTCCCTA  
GCAACTAGCATTTATTACCCTCATCTACCCCATCAGTTGTGATTAATCCCAAAGTGTA  
AACTTTTGCATACACTAACC  
CAAGTTTTCATCTTCTTCTTCCCCATTTAAGTGTGAATCTTAACCCAGTAATATTGAATT  
GATACTTCGCAAGATTCAG  
TTTTTTTACTTTCTAACTACACCTATCTTTTTTTAATCACTAATAAATAAATAAACA  
AAATATCTCCCTACTTTTT  
ACCAGATTCCTTATTTTCTTCAAACCTAAAAAATCAAAAACACACCACATACACAAAA  
ACATCATCATCTTCAATAAATA  
TAACACAACAACAACCCAAGAAACAAAACACACCACATACCCAGTTTTCTTTTTATT  
ATTCCTGAAACCTAATTTAC  
ATTTCATTTTTACAGTGAAACATTAATTTTGAAGCTTTTACACTAAAAACCGAAAGATC  
TAATTTTGAAATTATACCAAT  
TTTTAAAGTAAAAATTACATAAATCGTCCAAAGTGGTATATCACCCTTACCACACACA  
CACAACATAAAACACACATC

ATCATCATCACCATTTCTCTCTCTCTTTAACCTAGCCGCCGACCACCTTAAACCACCA  
CCACCGCCACACCGCCGCTA  
CCGGTTCTCTTTTTGTGTTGTAAGCAAAGGTAGGTTAAAACCCACGAGTTTTGACTCGT  
GTTTCTTGGTAACTCGTTGAT  
GAGTCACGAGATGACTCGGTCACATGTCGGGTTTGATATTAAAAACATGGGAAATGATT  
TCTTGATAATAAAATGTGGTA  
TAAAACTTGTTGGTATCCGCGTTTAAAGTCGTGCATCACGACACCACAGTCACCATCTCA  
TCACCAACATGTGCAGCCGCT  
GCCTTCCCTTCCTTTGGTCAAGAAACAGTGTGGGTTTTGGTTCGTGCCTTCATGGTTCTG  
TGATTATGATCGTGGGTTCAT  
GTTTGTTTTCGTTTTTATTATCTCCTGCATCTCCTTCTCCTCGCGTTTTAGTGGTTATCAT  
CAAGAGAGAGGTGAGTGAT  
AGGTGTTGATGGCTGTGTTGGTTGGTCGGAGGTGATGGTGAACAGACGGCGGAAGAG  
AGAGCAGGAGAGTGGTGGGTGGT  
GGCTGAGATGTGGAGAGGTTTTAAGATGAAGAGAAGAAGATGATGTTTTGTGTTTATG  
TGGAAGAGTATTGACCACAAAC  
TATATAAGGTGGAGATGAAATGACATTTTTACCCTCATGTGCAAGTCACATGAGGGGAG  
TTAACAGTCAAACCTAACGT  
CGTTTGGTCAAGGGACGAACGGCGCATAACGTTTGCCATTTAAAGACGAACGGCGCAT  
TTTTTTTGGTCAAAGGACGAAA  
GGCTGCGGTCAACACAAACCACAAGGACGAACGGTGTAATTTACTCATATATATATATAT  
ATAAAGTAGGGTAATTAGTT  
GATTAGTTGGAGAGTTTTAAAATACAATATATATGTAAAAAAAAAAAAATTATTTAAACA  
AGCATAGAATACCATATTCAA  
ACAAGTATACATGTCTCCTTGTTTTAAAAACAAGGGGAATAGACTCTGTCAACTTAAA  
TCTTTTGACTTTCCGAGTTTC  
CATTACATCTTACAATTCAGATCGTCCTTCACAACTCGTTCAACGCGCACTTTCTATAG  
AGGAAAAGGAGAAGCTGTTA  
TTTTTATAAAGAATTCGTTGCAAAAAATGGTGAGTCGTCTTCTTAATTCACATGCAATT  
TTATCTCAAATATATATATA  
CCTTTCCCCTTGATTTGTATGTTATGCTTGTTTGTTATCTGCGTTATTTTATAAAGGTTTA  
TCAACTTTATGGGTTGAC  
CAGTTTTTTAAGTTTGCTTTGATCATGTTTTGTTTTTGATGGTTGACCATAAAAATTTTG  
ATGACGACGGGAGGTTGA  
AGAATTATTGTTTTTGTAACCTCTGGTTCTGACCATTTGACCGACTAAATCACGGGATTTA  
AACTCATCACCACACAGACT  
CAAACCAGGTAAAGCACTCCATTTCTCAGAACGTTGGCCTAGCCACTTCAGGATTGTT  
TGCGCCTAGCAGGAACATACTA  
AACTAGAGATGTCTCACATTTTAGTGATATCGGTCACAAACCTTTTGCCACTAGGCCAC  
CATGAGTGTTTTTTTCTGTAG  
AATGTTGTAAATAACTATTACTGATGTTTTGTGATGATTAGGGAATAAGAAGGTTTAG  
GCTTTGTTGATTAGTAATAT  
ATATTAATATTATTGGATAGTTTAAACAATCCACATATATCGATCGCACAGGCTTCTGTTT  
GAATTTGAAATTTGCACTA



TCGTAACATAGATGCAAATAATGTGCCAGCAAAGTAGATATGTAATAATCCCTTAACGG  
CACTTGAACCTCCCAGTTATA  
CCAGTTGCATATAATCTTGTGACATATCCCTAGAGTTAGATAGCCGATAGTAGTGGAAGC  
GCTAAGGCCGCTATTCCTGT  
TATCAACCAGCAATCACTTTATCACACCCAATGACCCCGATCACTTTTACTAAATTGCAA  
TATTGGTTGTATAGTAGCTA  
CAATATACGTAATTGACACAATTCTCATCGACACATAGATTGCATAAACTGTATTTGCAT  
AAACTGAATTTGCATAAACT  
GAATTATGGATACAAGAAGTAACTTATGCAAAAAGTACCTTGTGCAAATATGTTGACAA  
TGGTCTGGAAAGAATTTAAAT  
AAAAAGTAGAGGTGGTGGAAAGTTTGTAATTTTTATTTTTTTTTTCATAACTGCGATTGAT  
CAGTTTCATTTCGTGTTAAA  
CTGATGAACAAAAAAGGTAATTAAGGGACGTGGATGTGAAACTTGAAAACAGAAAG  
TGATTGCAAATAAGTAATCATGG  
ATTTACTAACCTGATTAATTCAATCATTCGAAATGTATCCCTTTGTTGTGAAATGACAAG  
AAGTTTTTTTCTTTTTTGGG  
TGTGTTTATCAACGACAGTTGTCATCACCTCTTTCCGGAATAGACTTTGCAGGAAATGG  
ATACTTTTTCTTTGATCCTCT  
CTCTTATCAGCTAAAAAATTTGTTCTCACCTTTTTTATACTTTTTTGCAACTCATGATTTT  
TTTGTATTTGGATTTTAGG  
GAGTTTCGAGAGAATCATCAAGAAGCGACCAGCCCAGAGGACGTCATCATGGGTAA  
ATCCGCAGAAAAAGCAAGAGATC  
AATGAAGCATTGACCTATTTGATACTGATGGATCTGGTATGTTGCTATCCTATAAACCG  
GGGGTGTGTTGGATGTGCATT  
TTTAAAGTGGTTATGCCAACAGTATAAAACGGACACTCAAAACTGATTATATTGAAATA  
ATTAGACAATCAGAAGCAGAA  
TCTGTTTATGCCAACAGTAAAAGTTCCCAAATGCAAATCCATGGATCCCATTATGTTACT  
AGAGTGATTTGACATTTTGA  
CTTGTGTGGTATATTTCACTTATAATTGTAGGTACCATTGATGCCAAGGAGTTAAATGTTG  
CAATGAGGTATGAGCTTCTT  
TTCACCTAACAAAATTCCTATGACATTGGATTATGCAAACACTGATATCTTAAATTGATT  
TCATTTCAAGGCCTTGGGAT  
TTGAAATGACAGAGGAGGTACCATCTAATTGCCAATGATTACCTTTTATTTTTTATTTTT  
GGGGCTTCAGTTCTTTCTA  
AATTATCTTCACTTGTTACTATGATTCCCTACCATTATCTTAGGGCCCTTTTTTTACTGTG  
CCTCATTGCTTTCCTACAT  
GACAAAATTATCAGATACAATAAATTTATTGTCTTAATTGTTATCTATTTGACATCTTCGA  
ACATGTGTTTTAAAGAAAA  
ATCTTCCCCTTGTTTTTCATAGCTAAGCTTTATGAATCCTGTGATATTAAAGTTTTGTCAT  
ATTTGTATAACTCGTTTTG  
TTATATATTACACATGTGTAAATTTCCCATATTCTTTTGTCTCAGCAAATTAATCAAAT  
GATAGCGGATGTAGACAAG  
GATGGCAGTGGTGCAATTGATCGTGATGAATTTGAGTACATGATGACTGCCAAAATTGG  
TGAAAGGGACAGCAAACAAGA

GCTTAAAAAAGCATTGAAATCATTGACCAAGATAAAAATGTAATCGTCTAATACTG  
ACCACCTTATAGTCTTTTAA  
TTTGTAGAACTAATGTTTCTCTGGTAAATTACAGGGCAAGATATCTTTTGCAGACATTAA  
GAAAATTGCTAAGGAGTTGG  
GTGAACATTTTACTGATGCAGAGATCCACGAGATGGTCGAGGAAGCCGATTGTGATGA  
TCGTAAGTTTGTGTATATAT  
TCTCTTTATTGCATATATTGAATCAATTTGTAGTTTGTAGTTTGGGGTTATTTTTTCAACC  
AGTTACCGATATACCTTTA  
AAACCCATTGGGCTTGTGTTTGTAGTCATGTGCTTTTATATCGCGTTTGACAGGTGATG  
GTGAAGTCAGTTCAGAGGAGT  
TCATGAAAATGATGAAGAGAACTTCTTATGGATATTAG

>CsCML41

ATGTCGAAAATGAGTTTTCTTGACATCCAATACAACATCTCTAAGCGTAAGTTCCTTAG  
GAAACCATCTAGGATGTTCTC  
TAGTAGCGAAAGACAACCTTCGGGCCTGCCTATGTTCCAACCAAATGTGAACGAGATG  
AGGCGTGTTTTTGACAAGTTTG  
ATCGTGATAAAGATGGCAAGATATCAAGAGGCGAATACAAGGCTATTCTTAGAGCACTG  
AAACAAGGAGGTACAGAAAGA  
GACATCCAAAAGATATTTGAGGTGGCGGATTTGGATGGAGATGGATTATTGATTTCAA  
GGAGTTTATGGAGGTGCAAAA  
GAAAGGTGGTGCAGTTAAAGCGGTAGATGTGCAAAGTGCGTTTAAGACGTTTGATCTC  
GATGGAGATGGGAAAATAAGCG  
TCGAGGAAGTGATGAGTTGATGAAGAGGCTTGGGGAGAGGTGTAGCTTGCAAGATTG  
TCGAAAAATGGTGAGAGGTGTG  
GATTCGAACCAAGATGGTGTGATTGATATTGATGAGTTTATGACGATGATGACACAAAA  
CATGAAGATTAA

>CsCML42

ATGAGCAATTCAAGTGAGAGAAAAGCTGAGCTAAAAAGTGTTTTTGCCACCTTTGACA  
AGAACAAAGATGGGTTCATCAC  
AAAACAAGAACTTAGTGATTCCTCAAGAATATAGGCATATCAACTAGTGAGAAAGAT  
GTGGTAGAAATGGTTCAAAGGG  
TTGATGTTAATGGTGATGGATTGATAGATTTTGATGAGTTTTGTGAGCTTTTGTAGTCCA  
TGATGAGTAAAGAAGACATG  
CAAGGGAGTAAAGTTGGTGATGATGATGATCATGAAGATGGTGATTAAAGAGATGCTTT  
TAATGTATTTGATGGTGATAA  
AAATGGGCTTATAAGTGTTGAAGAATTAGGGTTGGTTTTGGACTCATTGGGTTTTAAGG  
AAGGGAAAAAGTTGGAAGATT  
GTAAGAAGATGATTAGCAAAGTTGATATTGATGGTGATGGTATGATCAATTTAATGAGT  
TCAAGAGCATGATGAAAAGT  
GGTGTTAGTCTTATTTTCAAGTTTCTTGA

>CsCML43

ATGTCTTCTCCTCCTAGCTACAACGATCTGTATCGCCTTTTCAAGAAGCTAGACCAAAA  
TGGAGACGGTCTTGTCAGCCC  
GCATGAGCTCCAATGGCTTCTTGATACCATGAAAGTGTCTTCAAGTGTGATGACCTAA

GATACTTAACGGGTAAAACCA  
ATATTAATTTTACTGAGTTCTTAGAGTTTTACGGTACCATTACAAAGGAAGAAAAGGTA  
ACCTGTGATGATGAATCAGAA  
AGTGACCTCTTCAAGGCGTTTGAGATGTTTGATAAGAACCGTGATGGATTCATTTGTAA  
TGAGGAGCTAATGGAGGCGTT  
AACAAGGTTGGGATTATGGGACGATAAGAGTAACATGGATGTTAAGAGTATGATCAAA  
GCCTATGATGCCAATTGTGACG  
GTTTTATTGATTTCCATGAGTTCAAGAAAATGATGGCTTAG  
>CsCML44  
ATGTCTCAGTGCTTAGAAGGGATCAAGCATCTATGCACTTCCCTACTTTCTGTTGTGAT  
CTTGAATTAATAACAATC  
GCAGGGGCTCGATGACCCTGCAATTCTCGCTAGCCAGACAGTTTGTATGCATTTAGTCT  
ACCATATTATGCTATATTTGT  
GCTCATAACTTTACGGGTTAATACTTGTATCTTATAACTTTCAAATTTTGGTGGTTTAGT  
CCCGTTACTTTTTTGTGTC  
AATTTTTCTAAGTTGCCGAAAAAACCTTTGGAGAACGACATAAAAAGTCAAGGGACT  
TGATGAGTGATTGAAGTTGGTG  
TATTAAATCTAGTCGTAAAGGGAAACAAAACACTCGTAAAAACGTTTAAATCACCATTA  
ATGAAAGTTTAGCGGTTTTAC  
CATTATTAACCTATATTTATTACTACTATTTTTATAAACATACAGAGATATCCTTATACAA  
AGATTCATTTTGTTTAAT  
GCAGTTAGTGTAAGTGAAATAGAAGCGCTTTACGAGCTATTTAAGAAGATTAGCAGTG  
CAGTCAATGACGATGGGTTGAT  
TAATAAGGTTTGTATTGAATCTGGAATTATCCTTATTTTGGTATGTTTATGCGAAATCGGT  
TTTTAATTATTTGACTTCA  
ATGCAGGAAAAGTTTCAGTTGGCATTGTTTAAGACCAATAAAAAAGAGAGCTTGTTTG  
CTGATCGGGTATGGTTCAATTT  
TAAGCATCTTTTGTTTTATGTAGTATATGATTTAGAAATGTTGTATCACGGTTATACTTAG  
GTTGCTCGAATTCAGGTGT  
TTGACTTATTCGACACCAAACACAATGGAATTTGGGATTTGAGGAGTTTGCCCGTGCA  
CTCTCGGTGTTTCATCCAAAC  
GCCCCTATTGATGATAAGATCAACTGTAAGTCTACATAGTTTTCTCACGTTGTGTTTGT  
TGCTTCTTTAGTTCTCATCG  
GTCATTGTCGATTTGCAGTTTCCTTTCAGCTTTACGATCTAAAGCAGCAAGGTTTCATTG  
AGAGGCAAGAGGTAAGTTGT  
GTACTATGCCTAAACATGTAAACATATACATGTACCTAGAACATTTAGTTTAATCGATTG  
GATTAATGATTGTGTAGGTG  
AAGCAAATGGTGGTAGCTACACTTGCTGAATCGGGGATGAATCTTTCAGACGATGTTAT  
AGAGAGTATCATTGACAAGGT  
ACTATTTCTTTTTTTTTTACTCTTTTAGGAAAAAAATTTATCATTCTTATTGGAAACCCG  
AGTGATAGTTGGTAACTTG  
TTTATAGACCTTTGAGGAAGCTGATACGAAGCATGATGGTAAAATCGACCAAGAAGAA  
TGGAGAAACCTCGTGCTACGAC  
ATCCTTCTCTCTTGAAAAACATGACCCTGCAGTACCTCAAGTAAGTTCATTTTCATAA

CAATTGTACACGATTTTTTTTA  
GCCATACAACACCTAAAGAAGAGGTTAAAAAGATGGACGGTGAGATGGTCAAAATCC  
TTAGTTGGTGTATGACTAAAAAA  
AGATGTGCAACTTACCGCCTTTCTCAAAATGTTAGGAAGTTACCACGTACTAAGGTTAC  
TTTTTCTGGTATTTGTTTACA  
GGGACATTACGACTACATTCCCAAGCTTCGTTTTTCACTCGAGAGTCGAAGATATGTAA  
>CsCML45  
ATGGCTGCATCCAAGACACAAGTAGAGTTTCATGATCATTACCTTTGATAGAAGAAAA  
GCTAGGCGGAGACGGTCTCAT  
AGGTGAATTATGCAAAGGATTTGAGCTTATAATGGACCCGAATAAAGGGGTGATCACAT  
TTGATAGCTTGAAGAATAACG  
CGTCGTTTTTGGGCCTCCAAGACTTGAGTGATGATGATTTGATGAGCATGCTAAAGGAA  
GGTGATTATGATGGTGATGGC  
GCGTTAAATCAGATGGAATTTGTGTTCTTATGTTTAGATTAAAGTCCTGATTGATGGAT  
CAATCTGAGTTTTTTGTTGGA  
AGAAGCTCTTGAACAAGAGGTTAAGAATTCATATCAATAG  
>CsCML46  
ATGGTTCAGGTTTTTGATTTTGCTATAAATGAATGAAGGACAATTAAGTAATTTACTAACT  
TACGAATTTGAATTCATTGA  
TATATTATCAGGTAACCAAACATGTTAAGAGATTTTGAAATAGAAATTCAAATACAATGG  
CATTTGAAATTTCTTGGTAC  
TTAAAGTCTCTTAATTTCAATTTACTTGAACCAAACGCCCAATTTAGGGTTATGTGGATC  
GACCGAATTCTCTATGGGGA  
TTAAGTTTGATAAGCTGTCAAATTTATATACTTAAAGTTAATTAAATGAAATCATAGTCCT  
TCTAGGAATGTTCTATAGT  
TTCTATAAATACCAAAGAAATTCCGAAGGGATTCATAACAATCCTCTAAACTCTAACT  
CCCTCTCTCGTTTGATCGACC  
AACCGAAGGGTCGAAACCCTTTGGTTTGAACCCTAAATCAGCCAAAGCTGATTTTCAC  
AAGTCGACTAAGCATAGTCGAC  
TTGTTACTTGCTTTCGTACTCTCCTAATTCACATAGGTTTCGTAGCCCTATTTATGCATGTG  
CAATATTGATGGTTACCTA  
ATGCAATCCAAGTAGTGATTCTTGCCCAAGAAACCCTAACATAATCGACTGAAACATTA  
ATGAAAAAGAAGGCGATTACA  
TGTTGATCAAGAAGGTTGTGGGGCTTACGAAACTGCAGGGACACAAGTCAGTAATCCT  
AAACACCCTTTATATGTGTTAG  
CAGGTTATATCACTGATTAGGAGATCTGTTGTTAGGGGTTTGGTCTTCATGGCCTTTATG  
TATTTATTTTCTGACGTGTA  
AGTTTTATAGGCCATACAGGTGACCACCAATACCCTACACTTATCAAGGGAGATACTCG  
TATTAGATTAAGTAATAATCC  
TATTTGCATATTCAGGAAGAGTTCCAGCTCGCACTATTCAGAAATAGAAACAAGCGTAA  
TCTATTTGCGGACAGGGTATG  
TTAATGCAATAAAAAATAACTATCAGGCATTTGCGGCTTCTTAAATACATCTTTTATTTTT  
ACTAAAGAAAACAATGCCC  
GGATTTGTTTTGTAGATATTCGATCTATTTGATTTGAAACGCAATGGAGTTATTGAGTGT

GGAGAATTTGTTTCGATCATT  
AGGTGTTTTCCATCCGGATGCACCAACAGAAGATAAAATAAAATGTGACTTTCGTCAAT  
TAATTATGACACTCTTTTCAA  
TAATTGCTTGCATAGATTTTGTGTAGTTTCCTAATATTCTAAACCAAACTCTTATGGAC  
AGTTGCTTTTAGGCTTTAT  
GATCTCAGACAAACTGGTTTTATCGAGAGAGAGGAGGTTAGTAGTAATTATTTATCGTT  
CTTGATAATTAAGTTGATATT  
AAATAAAAGGGTTCATTTATATGCTATGTTTCATTTAAAAAATTTGTTTTTGTGCAACAGT  
TGAACGAAATGGTAATAGCA  
CTGTTAGACGAATCTGATTTGGTACTTTCAGAAGACGTTATTGAAATGATAGTCGACAA  
AACATTTAGTGATGCGGATAT  
TAAAGGGGATGGAAAGATAGATGAAGAGGAATGGAAGCAATTCGTAGCACATAATCCA  
TCTCTTATAAAGAACATGACAC  
TTCCCTATTTAAAGTATACCACTTTATTGACAATTAGAAATTTATCTTCCATTAATGCA  
TGGTATTTTGATATTTTAA  
TTAACCTGGCACCTACTGAATTTCAAGAACTAATAGACAATATATCTGTAGGGACATAA  
CTTTGGCATTCCCGAGCTTTG  
TTGTAACCTCTGAAGTAGAAGACTCGGAAGTATAG  
>CsCML47  
ATGGGCTGCATGTGCTCTAGTGGCATTAAAGCATACTCCTGGGTATGAAGATCCTGCTATT  
CTAGCTAACGAAACCCCGTG  
TGAGTTCTCTAAATTATACTTTTCACATCATATTATCTTATGCACATTTACAAGTTCATTG  
CCGAGTTTTAATCATTGA  
TATGATTTGGAAGAAAAATCTTTAAGTACTAGTTTCAGATTAAAAAAAAAAAAAAAAAA  
AAAAAAAAAAAAAAAAAAAAA  
AAAAACTGAATTTGGCATCTTCTCTGGATGGATATATATATTGTACATGGAAAAAAGTAG  
TGATTGTTTTTTTCTTTTA  
CAGTCACCGTGAGCGAAGTTGAGTCATTGTATGAGCTATTTAACAAGTTGAGCAGTTC  
CATTATCGATGATGGCCTTATT  
CACAAGGTATTTTTAAATGATAATGATCTTTGAACTTTTTAAGTAATCAAATACCTAC  
TTATCAAGGGAGATACTAGT  
AGTAGATTAAGTACTAATCCTCTTAGCATATTCAGGAAGAGTTCCAGCTCGCGCTCTTC  
AGAAACAGAAACAAGCGTAAT  
CTTTTCGCAGACAGGGTATGTTAATGCAATAAACAATAACTATCTAGCATTTGCGGCTTC  
TTAAATACGGAGTACATCTT  
TTGTTTTTTTACTAAAGAAAACGTTGCTCGGATTTTTCTTGTAGATATTCGATCTATTTGAT  
GTGAAACACAATGGAGTTA  
TTGAGCGTGGAGAATTTGTTTCGATCATTAGGTGTTTTCCATCCGGATGCACCAACCGAA  
GATAAAATTGAATGCGAGTTT  
CGTCAATTAATTATGACATTCTTTTCAATAATCTGCTTGCATAGAGTTTGTGTAGTTTTCT  
AATATTCTAAACCAAACT  
CTTATGGACAGTTGCTTTTAGGCTTTATGATCTCAGACAAACTGGTTTTATCGAGAGAG  
AGGAGGTTAGTAGTAATTATT  
TATCGTTCTTGATAATTAACCTGACATTAAATAAAATGGTTCATTTTTATGCTATATTCATT

TAAACAATTTGTTTTTGT  
GCAACAGTTGAATGAGATGGTAATAGCATTGTTAGACGAATCAGATTTGGTACTTTCGG  
AAGACGTTATAGAGATGATAG  
TCGACAAAACATTTAGTGATGCGGATATTAAAGGGGATGGAAAGATAGATGAAGAGGA  
ATGGAAGCAATTCGTAGCGCAT  
AATCCATCTCTTATAAAGAACATGACCCTTCCCTATTTAAAGTATACCACTTTCTTGACA  
ATCAGAAGTTTATCTTCCAT  
TAAATTGCATGATAATTTGATATTTTAATTAAGTGGCACCTACTTAATTTCAAGACCTAA  
TAGACAATATATCTGTAGG  
GACATAAGTTTGGCATTCCCGAGCTTTGTTCTAACCTCTGAGTGTGAAGTAGAAGACTC  
AGAAGTATAG

>CsCML48

ATGGAGCTTACGTCCGTAGCAACTGCAGCCACAACAGGAGGTATACTGTCCATGGAGG  
TCAAATATTTTATAATCTTATA  
CATGTTTGTAGAGTGGGTGAACTTTTACATGATTGTTATTTTCCTTTTGGCACGACCCAT  
GTGGCGGTTTATCTCTACTA  
CAGAAAACACTACTTGTAGACCAACTCCAAGCACAGTTGCTCAAGCCCACGACACTAT  
ACAGGTTTTCCATGCATATAAT  
AGCAGGAAGAAGTCATTAGGAGTAGATCTTGAAATAGTTTTGAAAAGATTAGGAATGT  
TTTGTGATCATGATGACAAGGG  
ACAAATTATTGGCTCTGATGAGATATTGGGTTTGTGTTGACGAGGACGAGCCAAGCTTGG  
ATGAAGTGAAAGAAGCATTTA  
GTGCGTTTGACAGAAACAAAGACGGGTTTCATAGACGCAAAGGAGTTGCAACACGCGC  
TTTCAGAGATGGGGTGTATACAA  
ATATCAGAAAGCAATTGTAGACTGATGATTGGAGGATATGATGTGATCAAGATGATAA  
GATTAGTTTTAGAGAGTTTTT  
GAAGCTCATGGAAGACTGTTTTTTGA

>CsCML49

ATGGGTTGTATAAGTTCAACTCCGAAGGAATTCAAAAAGTTACCAGCTTATGATCCGGT  
TGCGCTTGCTGCTGAGACCCC  
TTGTAAGTTTTCTATATTCTCCCATTTTTCTGATTATCTTTTTGGCTATTTTTTCATTTGTTT  
ACATGTTTTATACGGAG  
TATCATCTTTTGCCATAGTTGTATTGACGACCTTTTATACAGTTTAGCCTCTTAGGTAGTT  
ACAAGTGTGGTAACAAGTA  
TCACAAATTATTGTTATTTTCATTGCTGCGTTATCAATGTATGTGATGTGTCATTATTGAG  
AGTCTTGAGCTATTAGTAC  
CGTCCAAACAAATTTAACAAATAGAAAAACCGTTTTGGGATGTATTGGATTTTAAATC  
TGTGTGGCATTTCGACACTTGC  
AGTTACTGTGAATGAGGTGGAGGCTTTATACGAGCTGTTTGAGAACTAAGCAGTTCC  
GTGGTGGATGATGGGCTTATAG  
GGAAGGTATACATTCCTTTTATGATGCCGTGAATGTGACATTTTCGGTTGGTTTAATATG  
TCTTTGCTTGGAAGTAAATT  
TTATTAAATAAATTTACATTTGGCAGGACGAGTTTAACCTAGCGCTATTTTCGAAATCAT  
AGTAAACGAAACCTGTTTGC

CGATCGGGTAAGTATGGTTCAGCTTTTGTCCCTATCAAAGAAAAACGTACAACGGTAA  
CTGTATGCTGCTCTTAGTTTGG  
ATATGAATCATAGGATTGTCAACATTTTCCATATATAAACTAATCGTCTTTTTCATATCGTT  
CCTATAGCAACTTATGTT  
GTTACTTTTGTAGATATTTGATCTTTTGTACGTAAATAGGAGTGGGCATATTGACTTTAA  
CGAGTTTGTCCGTTTCGTTGA  
GTGTATTTTCATCCAAAAGCTCCTCAAGCCGACAAAGTTTTGTGTAAGAATAATGATATG  
ATACTTTTTTTCGTGGTTTTA  
TATTCACAATTATATGATAGGAATGATCATCTGATACATTATGCAATCAATCTTGTTTTAG  
ATGCGTTCAGACTTTATGA  
TTTAAGACGCACTGGCTTCATCGAACGTGAGGAGGTAAGTTGTTCACTTTGTTGTTTTT  
TACCAATTAAAATATGATTTG  
TTTTCCATATCTAAAATATACTTAAGAATAATATAATGTAACAATGCTGATTCTGGTAACT  
TTTTATAATGGGAAGCAGT  
TGAAGGATATGGTTAAGGCTCTTCTGAGTGAATCTGATCTTGTTCTATCAGATGAAATAA  
TTGAATCGATGGTAGACAAG  
GTATGCAATACATGTTTGTATTGTTAGTGACAACCTTAAGGCTTGGGTTGTGATGATT  
GTATCTTTTGTTCATATT  
TAGACTTTCGCAGAAGCAGATTATAAAGGTGATGGTAAGATTGACCAAGAAGAATGGA  
GGGAGTATGTCGACAAGAACCC  
GTCATATTGAAGAACATGACTCTTCCTCACTTAATGTAAGCCATACAACCTTGCATCAAT  
GCAATTTTTATATTATTTT  
TATTTTGAGTTTAAAGCATGCCAACACTTAAGATGGCAATTTTTAGGACCTTACATAATT  
ATGCTCTTATCAAGTTATTT  
TTACCTTTTTTAGACTCGTTTCAGATAATTGTTTTGTGTCCTTAAAATGTTAGTTTTATAC  
ATACGGATGATATCTCGCA  
ATCTGTAAAGTTAGAACAAAGCTAAGATGCAAAAACCTATGACTGCAAAAGAGGAAAA  
ACAAGTTGCTTAGTTTGGACGGA  
TAATCTGATATGTACAATACCAAGTAATTGTTACAGTATAAACGTAGGTTATAGTATTGTG  
CTTGTTTTACATATATGAT  
GTACTGTATTAATCATGAATGACTATTTCTTCTGCTGTGTGGTTGTAGATTTGCATATAA  
AAATAGCTGCATAGAACTA  
ATTTTAAAGAATATCTCTATCCTAGATGCGTATCTTTGCAATATGGGTATTCTTCAATATCA  
GTTTACGTAAAAAACTT  
ATCTTCGAAATGACCCTTTGTGATGTTGCATTTTTGCCAATTTTTGAATTCAGTCTTGAT  
TTTTAAGTATGGTATTTGCG  
AAATGACTTTATATCTCTTGATGGTGCGTTTCAGGGACATAACTTTGAGGTTTCCAAGC  
TTTGTGATGAACAGCCAGGTA  
GAAGAGACTCAGTCAACAGACTAG  
>CsCML50  
ATGTCTTATAACCCATCAGGTTACAACCTATGGTGCACCACCACCTTCTCAACCATACTAC  
TCCACCCCTTACGCCGCACC  
GTCACCTTACGGTCAGCCACAACAGCCCGCTTTCACGAGCCCCCTACGGTTATGGAACA  
TCCACATTTCCACCGGGGACGG

ATCCTAATGTGATTGCGTGTTTTCAAGTGGCTGACATAGACCGAAGTGGTGTCGTTGAT  
GATAAGGAGTTGCAAATAGCG  
TTGTCGTCGTATAATCAAAGTTTTAGTATCCGTA CTGTTCGTCTACTTATGCATCATTTTA  
CAAATACCAACACTAGAAA  
GATTGGTAAATATTGAAATATGATTTTTATTTTTTTAGCTGCCTTAAATATAGTATTCGACT  
AATATGTATAATCTTTAT  
TGA CT TGT TCTCTTGATGATATCAGGACCAAAGGAATTTACTCAAGTGTTTTATAGTCTA  
CAAAATTGGAGAGTATGTTA  
GAAATATAAGCTGCATTAATTTTGCCCTTTTAAATATGTTCAACCAAATGTTTTTATACCT  
AAGTAACTTTGTGTTTACA  
GGCAATTTTTGAGAAATTTGATCGAGATCGAAGTGGTCATATCGACACCTGGGAACTG  
AGAGAGGCACTCATGAGCCTCG  
GATTTACTGTTTCACCCGTTGTCTTGGATTTACTCGTCTCCAAGTTTGACAAGACTGGT  
GGATATAAGAAGGCCATTGAG  
TACGACAATTCATCGAGTATGTCTTCGATCATAACAAC TTTTATATTACGATCAAGTTCC  
ATTAGTCTTTCTTAAATTT  
CTAATAAGTTTTTTTTTTGTTGTTTCTGGTAATTTCAAGGTGTTGCCTCATTGTTAAGGTATG  
TAATACAAGAAAATAAAAC  
CTTATACTAGTTAATGTCTATAAGCTAACATTTATGCAACAATCAAGATACATGTCTTAA  
AACTAGGTTCTCGACTCTT  
ATAAGATTGTGTGATCGATGTATGCAGGGGTTAACCGAAAAGTTCAAGGAGAAAGACA  
CAATGTATTCAGGCAATGCGAC  
ATTCACATACGAGGCTTTTATGTTAACAGTTCTTCCGTTTCTCATTGTTTAA  
>CsCML51  
ATGGGAAACACATCATCAATGCTGACACAATACGACATCGAAGAAGTACAAGAACATT  
GTAACAACACATGTAAGTATTC  
AAATCTGACTGAACCCATGTAAAATATATAAAGTTTTGATGTTTCTTTTTGGTTGATTG  
TAGTTTCACAACAAGAGATA  
GTGTCATTGTACCAAAGGTTTTGTCAGTTGGATCGAAATAGTGGTGGATTTATCTCTGC  
TGATGAGTTTCTTTCGGTCCC  
CGAATTCGCTGTTAATCCCTTGTCTCAGGTTTAATTATCATACCCTTTTCAGCATTATGTT  
GTTTGATTGTTGAAATTTA  
ATGTTGTTAGAGTTTGCATGTTTGTGTTTTTTTTTAGTGTGGGAATTTGAATGTTTGGATG  
ATGTTGTTTGAAGTCGTGAT  
GATCAGATAATCAGTTGTTTCAAAACGCGAAAGTGCAATACCAAACACCCTTTTAGTG  
AATTGATGGATTCTGACCATTT  
TGATGTGTTTACGTGTAAAGTGA CTGCTAAGTGGTTATATAACAAGAATTAGTTTTGTTG  
TGTCATCCAAACACTAGAAA  
CTAGAAATTGATTATATGATACGTGAAAAGGGAATAATCTGATAATGACTTTCTAAATGC  
AAGTCCAAACGCCCTATTA  
ACGTTTGTCAAATTTAAGGTTATTTAAGGCTTTTAATTGTTTTTTGTTTTTTTTTGGTTCT  
GTCAGAGGTTGTTCAAGGAT  
GATTGATGGGTTGAATTTCAAGGAGTTTGTGGCATT TTTGTCTGCATTTAGTTCGCGTG  
CCACCTTACAGCATAAAGTGG



AATGTAACCTACCTTCTCCTTTGCTGTATGACATTCCGTAAAGATTTATATAATCTTACTTG  
TTAAGAATGAATCTTACTC  
TATTGCAGTTATATTTAAGGTGTATGATTCCGATGGCAATGGGAAGGTTGCATTCTCTGA  
TCTGTTAGACGTTTTGCGGG  
ACTTGACAGGGCAATTCATTTCTGAACAACAAAGAGAGGTAAGTGTTATTACTTGACA  
ATGGTAGCATTTGGTTGTTTGG  
TTAGTGTTTAAGAGACTACTGAAAATAGAGTACGTCAGCATGGGAGCACAAGCACTTG  
TCAATCTAATGACCAACTGAAA  
ATCTTGTCTGGAAGAAACCATGTACTCATGAAATCTACAATTCCTATATCATATGTCACA  
AGAATTTGCAACATCTGACT  
CTAGATACAACTAGTTGACGTAGCTATATGTGTGAAATGTTTTCTAGCTTCATGTTCAA  
GAAAATCCTGGGCATTGAAA  
CTAGTTGTAACCTACCAAGCGATAATTAGATCAACGAGTTGGTAATTAAGGGAAAGA  
AATGCGTTAACTTTTATGGGAT  
GAAAGGAGCATAGGAATACTGATCTATGATGGTCAGAGAATGGAGATTTAGACTACTTT  
TTAAATTTAAACTGAAGTGA  
ATTTTATTTGATCGTCTTCTTTAAAGATGGTTAACATAAATACTATTTAATTTACAAGTG  
GAGAAAGTAATGTCAGCTC  
CATTGTATACATCTTCAATATACTCGCCCAAATCTTATATATGTGAAAGAAAAAAAAAA  
GTGTTTTATAAATTATAACA  
TGCATTTAGCTGCTTGCATCTGAAAATGTATGCAATGGTTTCGTTGATTAATGTGCTTTT  
ACATGTCACCAAGGCTAGAA  
GTAGAGGTTTCAGCTGTAGTTTAGCAACATAATGCATACAACCTTTTAATTCTGAGAGTA  
CTAGGTTTCGAATGTAAAAAA  
TTAAGTGCATCTCTTCATTAAGTCAGAAATGTTTGTACTAACTCGTTTAAGTCGCCTAC  
CTTTTCTTGGCATTCCAAAA  
CGTATTTTATTTGGCTTCATTTAAGTGAAAGTTGCATATGATTTGAAGTTGAAAAGCCTA  
ATATGATCATTTGGATGACA  
GAAAATCAAAACAAATATTATCTACAACCTAGTTCCGTCACCTCCGTGTAGACGGGAATTA  
AAGGAAAAGAAAGGGAGTAA  
GTGATTATACACTGTGTTTGTATATATGTGAGGGAAATGCATTTTCATATTGGGTACTATAT  
AGTCTGGGAATATGCATCA  
TCACCCTATTACCCCTAGGTGCATCCTTTATTTAAGTATAGTTATCAACACAAACCAAT  
TCACTAGTCAAGTAACGTGT  
TATAAAGACTAACAAGAATAGCAACAGGTCGTAGTGAAAACCTTTAGAAATTATGCATCA  
GAAGTCAAAGTTGCTCAATGG  
CATACAAAGACAAGTGAAATTTGCCGATACATAGTAGCATCAACATTTTAATTCGCAAG  
ACTAGAATACTGAAGACTATA  
AACAATCTGACTGTCTCAATGATTAAGGTTTGGGCAATGCATCAACATTTATACTTAT  
GGATCTACAGCATGAACACT  
TCCGAAGAGGCTCCTGAGATTATGACCACACTGGAGATCATAATCAAACAGAAACAAA  
ACATATATTAAAAAGAGCACAA  
TCATGATAAGAATCATTTCTTATAACATTTGATCCGTTCAATGTTTATTTCACTTTCTATGT  
GATTATGTTTATATTTTG

TACTTCCGTCATGTGTTTCATGTGATGTTTATGGTCATGTCTTTAATAAGTTCTGCAGCCC  
CGCCTCCTCTCATGCTAACT  
TTGTTGGCTACTGCCTACTGACGTATAGCTATATGTTCTTAGTATACAAATTCCTTTGCTA  
TTAACTTGTTTAATTTGAT  
TGCCTTGCATTTTTATTTACTTAAAGGACATGTTGAGGGTATATGGAAATTCCTTGTTT  
TTCTTTTTTGTCAACACTCG  
CAAACAGAGCTATTTCTATTACTGCCTCTCTGACAATTCAGATTGTATTTTTTTTTTAAAC  
ATATGTGATCTTAATCTCA  
ATTCCACTTCTACAGCTTGTCTGACGCAAGTTCTGGAAGAAGCTGGGTACAAGAAAG  
ATTCGCTATTAGTTTTGTCCGA  
CTTCATGAAGGTAATGAGTTTATCTTTTCTAACTCAACAACTTTAACTCCCTCTGTTTCA  
CACTTAGGATGATGTTTTGG  
TTCATTTCTATAGAAGGATATTCAGTGTATGATGAAACATTGTACTCAAAATTAGTGTTT  
ATGGTTACATCTTACCTTCA  
TATTTGCAAAATTTGGAATTTGGTACCCACTTGTGAACTATTCTGATTTGATCAGTTTTG  
TCATTCAGTTACTGATAGTA  
AATGGATTTGGTAGCTGTGATGGGCATAAGCATGGTAATGTCGTTGTAGAAGTTATTCAT  
TTGCATATGATGCAGTACAT  
CCACCTCTACATAGCCACAGCAATTTCTATTTTCTAGAATGTTCAATTTTGGTTACAAGTTT  
CGTTTATGACACGTTTTTCAT  
GCTAAAAATACCTGAATTCCCAAATTCATGATGTATAGGCCATTAGTTATTCTTCAAGTC  
TTTTACTAGGATGAGGATAT  
TATTTCTTGACGAGAATATTGAACTACCTTGTGTTGGATTTCCGGATCCAGAAGACTTTA  
GCATGTTTATAAAGTGATAG  
GAGCATAATCTTGTGACAGTCATTCATGGCTTGAGGTTTGGTCACAAATATATCAGGCA  
CACCAACACTGCATGAACATC  
ATCTATAACTTTTCCATGTGCATATGAAGAGTTACATTTTAGGTAGTCCTTTTTTTTAAAT  
AATAGTAACATCCCATATG  
GTAAACCTTGGTACACGGGAACTCACTTTTTTCGAGGATACCCTTGTATGTGGTGTTTTT  
TTTGCACCTTTGAGCGGGGTTG  
TTTCTGGGCTTTGAACCCTTATTTGTTTAGTACTTCATAATAAACATTTATTGCTGCTTGC  
TGCAGATTCTTGGCAACAC  
AGGCTTGAAGATGGAGGTTGAGGTTCCCGTGGACTAGTTGGAGACATTAAAGATACAT  
AGATTATTATAATTGCTTGCTC  
TCTTAATAGGGCCTTTAGCTGCTTGTATCTTGTAGTGAAATGACCTATGTTCTCAGTTA  
CCCTCTGTTTGATTCTGAAT  
TTGGTCGATTGATTAGCATGTGTATTCCACAGTTTATTAGCATTTTCATGGATTGGTTTAA  
AAAGAACTTCCATTTATTG  
TGTTTGATCTAGCTTTAATGGTGACACAACCTCATTCAGTATAACAAGAGATTTTGGTTAT  
GTAGCTGTTTTAGTTATGAT  
TTTGGGTGTGTGTGTGTGTTGGTATAGAATGTGTTAATGTGTAGATAGCATGTTTTGTTT  
ATATGTAAGGTAACATGTTG  
TTCTACAACCTTATTTGTATCATTGTCTAGTTTAGACAACATGACCACATCTGTAACCTTG  
GTACTCTATACAAACATTCT

GAATTATACACAGCTTAAACATGTCACTTGTATTAGGCCATTCAGCTTGAACCTCTATAAC  
ATAGCTCGCCTCTTAATGGA  
CTAGCTAAATAATAATTAATAACACAACCTTTTTTTTTTACCCCAATGCTTTACAAAAAACT  
CATTACAAAGCAAAAAGGGA  
TCAAATCAACAAAAAGGGGGTATCACTGATGATACAAACACATGATGATGATGATTGTT  
AATTTGTTAGTCAGAGTGATA  
ATTTTGATTAGGGTTGACGATAACAACACATATGACGTGTGTTACCGGTCGTTAGGTGC  
ACAAGCATATATGAGAGATGG  
TGCGTGTAGTCAATACATTTAAAGCAAATATCGTACATACATACGCACATACTATATCATT  
GTACACATGTAAAGTTCGT  
CAAGTAGTTTTTAAACGATTTTCAAATTTTATGGTCAAAGGCGGTACACGGCGGTGCGTG  
AAGGTTTTTAAAGAGGTTACA  
TTGGGGTGTTACACTGAGACTCTTAAGTGGATGGGGTTCAATTTTTGCAAGCAGCCTCT  
TCGAAGGCTAGTTTTTGGGTG  
CAAACGTCTTTGTGATGTCGGGAAGAGAAATTCTACAAATTGGTCATGTGTTTGAAC TA  
CCTTTGGTTCGTAAAGTTACAA  
ATGAACATTACACGAAATACGATTCTTAGAAGAAGGTCACATCAAATTCAAATGAATC  
ATGAAATAATGATTGCTCATT  
GATTTTTATGAAGTACAGTAGTAATTAATGATAAGGATCCTCTAAAATTTACCTTCTC  
ATCTCATGATGGTCATGTTG  
AACAAATCAACAATAATAAAACAGAACCACTAATTAAAATAAGAGACTTATTATTT  
TGATTTCTCTCACAATATCAA  
TAACATAATAGAACATAAGAGAGTTAACTTTAAAAAAGCTCAATCCTAATTAATAATAG  
ATACAAACGAATACTATTTCT  
TTAAAATTTATTGTTTACCTTTTAAAGGATTGTTAATTTTCACTACTAAAAGTTATTAAAA  
AAAACCGCATCGAGTTTAT  
CATATTAACCTTTACTTGAATTTGTTACCCCTTGCGTCATTTAATAGGTGTCAACACCTTA  
TTTTTGTTTCTCTCAAAAT  
AAGTGTCTAATTAATATGTCAACTAATCAAAAGAGACGTTAGTTAGTAGAGATGTTAATT  
TATTTGTGTAGAATTTATAT  
ATTTAAAGTTTTGTACATTTTAAAGAAAACTTATTATAAAAACTTAAAAAGTATTAT  
TAACTAACTGCTTGAGGACA  
AACTTTAATTCTACAAATACATTAAAAAATGAGTGCTTTTG  
TTTTCCTCGTGAAGGGGAATT  
ATTTGACTTTTGATTGGTCGGATACCGCCAATTCCAATTCCAAATATGATTTTCTAACTT  
GTGCCTAAGCGCGCAAGTT  
AAGCACACTAAAAGGACACTGAGACCCACAGAAAAGGACACATGAATTCACAGAAA  
AGTACAATTTTTGTGGATCCCTGT  
GTCTTTTTCTGTAGGTCCAGTGTCTTTTAGTGTGTTAACTTGTGCCTCAGGGCACATT  
TTAGACAAACCTTCCAAAT  
ATGTTGGAATAATTTCAATTCTAAATGATGTCATTGGAACCTTAAAAATTCACAAACCT  
ACTCATCTTTATCACAACA  
CCTCTCTTCACTACTTGTGACAACACAGGTATGTCCAACTACGAGTATAATGTTTACT  
GTACTACTAATTTAGGAGTG

TTTGGATTAACTATTTTTGGGCTTATTATAGAAAAAGTATAATCTTAACCCGAAATCAG  
GTATTTAATTATTTATATAG  
CCAATTCCTTTGTCCAGTGGTATATAATTATGCCCACTTACGTAGAGGTCGTGCGTTTA  
AGTCTCGTTAAAAAACATT  
AGTGAGATTTGTGGTACAGGAGTCCCAAAAGATTGCGGTTCTAAAAAATTAACTCATTT  
TGGACGAAATGTGGCCTTTTT  
CTAACGACGGCACCTCACTGTGTTTTTCGAGTATCACTTAAGTAGGAAAAGGAAAGAAA  
ATGAAGAGAAACAAAAAAATT  
GTGTTCTTGAGTGTGCTCAAGGAGGAAAATAAAATGAAAAGGACTGAAAAATGTGA  
TATTAGTCATTGAAAACCTTTTT  
GATTGGTTGAAATATACAAGTGAACACTTATTTTGAGACAAAACAAAATAAAAAGATG  
AACATATAATTTGGGACGGAAG  
GAGTAATCAAGTCGAGTTCATGGACTTAAGTAAGCTGTATGCTTAAGGTGATAAGCTTT  
TATGTGAAAAACGAAAAGTAA  
GCTTGCAAAGCTTTTTTAGTTTCAAATAAGCCAGTAAGCCACAAAAACAAATTAATCCA  
AATACCCTCTTTAATGTGTTA  
AGTTTTATTATGATGACACTTTTGGTCAGTTAACTGACAGGAAATGGCTCGACTTAGTT  
TAA

>CsCML52

ATGTCGTGCTTAGAGGGGATCAGGCATTTACTTGCTCCCCTGCTCCGTTGCTTTAATCTT  
GAATCATTACAAAAACAAA  
CCCCCTTGAAGATCCTGAAGTTCTAGCCCGAGAGACTGTTTGTATGCTACCAATCTAAG  
TAGTCTTTAAAGTAGTTATTT  
GTGACATTGATTAATTGGGTTATTACTAACTAGAGTCGGTTGTGGTGTAATGCAGTTAGT  
GTAAGCGAAATAGAAGCACT  
CTATGAGTTGTTTAAGAAAATTAGCAGTGCTGTGACTGATGACGGGCTAATTAGTAAGG  
TTTAAATCCTCTCTGTATTCT  
TTTTTTTTTTTTTTTCATTCTTTTTCGATAATTATAGGATTGCAATATCAATATTAGATAATC  
TATATGTACATCACAGG  
AAGAGTTCCAGTTAGCCTTATTTAAGACAAATAAAAAGGAGAGCCTTTTTGCTGATCG  
AGTGTTGATCTGTTTGATACC  
AAGCATAATGGAATCTTAGGTTTCGAAGAGTTTGCTCGTGCACTCTCTGTATTTTCATCC  
AAATGCCCCTGTTGATGAAAA  
GATCGAGTGTAAGTTGAAATAGTTTTCTATTAATATATGACCTTGGATTTAGTATTAAAGC  
GTATTCTCATTCTCCATTT  
GAAAATTTGCAGTTTCCTTTCAACTTTATGATCTTAAGAAACAAGGTTTCATAGAGAGG  
CAAGAGGTAACTTTTGTAATT  
AAATTGACATCTTTTGTAGCGTCAGAATGATTTTATAGCATGTGGATAATTATATTGAATT  
GTGACATGTAGGTGAAGCA  
AATGGTGGTGGCGACTCTTGCTGAATCCAAAATGAACTTACTGATGATGTTATTGAGA  
ATATCATTAATACGGTACCTG  
AACTAGTTAAATCTTATGCTGACTATATTCACAACAATTCGATAGTCTAACAAAACCTGAA  
TAATTGTGTACTTTGTTTAG  
ACATTCAGGAAGCTGATACGAAACATGATGGGAAGATTGACATGGAAGAATGGAGAA

GCCTTGCTCTACGACATCCGTC  
CCTTTTGAAGAATATGACCCCTTCATTACCTTAAGTAAGCTTCGTTGCTTCATAGGATTGA  
TACTATTGTTCTGCATACAT  
TTGGAACCGATGCTACCAAGAGGTTATTAGCCCAATAATCGATGATTGGTAGTTCTGCT  
TCGTAATAGACGTTTGTGCTA  
ATTATGAGTTATGGATATTGAGTTATCTTGAAATTTGACAGGGACATCACAACAACATTT  
CCGAGCTTTGTTTTTCACTC  
AAGAGTTGAGGATTCTGTAA  
>CsCML53  
ATGGGTGGTAAGTTGACCAAGGCTGATGAATCACCTAAGACTTCGGTACCTACAACCA  
AGCTTGAAGCTAAAATCTTGGA  
GACAATCCGTCGCAGAGAATCTAAAGGAACTTCCATGAAATCGTTCAATACTATAATCC  
TGAAGTTCCCAAAAATTGACG  
CAAGCCTAAGAAAGTGCAAAGCTATATTTGAGCAATTTGGTAAGCACATAAAAATTTG  
TGATATAGTAAATTAATCTTC  
AGCTTAGCTGTTTTAGTTTCTATTGTCTGTGAATTCTATGGCAGTGTTTGGATGTGCGTA  
TAACTTCAGTTTTGAGTTT  
TATTAGTAGAAGTGTACAATAATCAGTTCTGGAGAAGCATGTGCTAAGTTGTAAGAAA  
ACTTATTATTGGGATAGAGGT  
GAAATAGTGGTGACCCAGCGGTAAGAATACCAGCCTGGGATTACTCCGGGCTATCCAA  
AAGGGTAGTCGCTCTGGGATTA  
GTCGGCTCGCAATGTCGAGTCGGAAACCCAGGTAACCAAAAAAAAAATAAAATAAAAAA  
TAGTTGTTCACTTTATTGCATAA  
AAATTTAATGTGCCCTTTTTATATAATAATTATCATTTTTGAAAGTCTGGTTTTAAGAGCT  
CTTGTTTTCAAAATGGAAT  
GACTTAAAGTTGTAAAAATCGCTAGGCGCTAGTGAGGCGGTCGGGTAGGGCCTAGCG  
ATTAATCGGTTAGGCGGGGATT  
AATCGGGGATTAATCGGATTGGAATTTTTATGCACAAAATTGTAATTTTAGATATCATATT  
ATATTATATGCTTGTATGA  
AATAAGCATAGTGCATCAAAGTTCAAATATTTAAGTGTTCAAATATAAACATAATACAT  
AATCTTCAAAATTTAAAGT  
CAAACATAGATATTACTCGGTTTGTTGACCATTTCTAAGCGATCTTTGACTGATTAATCA  
GTTTTTTGACCAATTTTTAA  
GCGAGTTTGTCCGATTTTTAAGCGATTTTGTTGACATATTTTAAGCGATTTTGTTTGATT  
AATCAGATTAGACCGATT  
TGTTTCGATTTAGTCCGATTAATCGGTTTGTTGACTGATTTTTAAGCGATCTTTGACAAAC  
CGATTAAATAGGCCGATTAT  
GATAAATCAAGGCGCTTAGTGAGCGATCAGCGATTATGCGGGGATTAATCGGCCGCCTG  
GACCGATTTTTACAACAGGTA  
AGTTAAATGTACTAGACTTGAAAGAAACAAATGATAAAGTACATTGGTTATGGATGCAA  
ATCACCCATAAAATAATCTAC  
CTATCTTTAGCTTTAATTATATCAATAACTATTTGTAACCTTTCACATTGAATACATCCAA  
ACACCCCTACATATTTATT  
TCATCTTTCATTCAATTTTATCTTCAATTTTGCGAGTGCAGATGAAGATAAAAGTGGTAC

AATTGATCCGAAAGAGCTGA  
ATCATTGTTTTTCGTAAGCTGGAAATAGATTTTACAGATGAAGAAATCAGTGATTTATTTA  
AAGAATGTGATATAAACCAT  
GACATGGGAATAAACTTCAAAGAGTTCATTGTGCTCCTGTGCCTCGTTTATCTTCTGAA  
GAATGACCCTGTTTCCCCCA  
TTCTGTATCCTTGCTAACGTCTACACAAATACAGTATATGGTTTACTCATTTTTTGGTGTG  
CTTTTGTGTTCTTTTTTCC  
ATCATTTTGTATATTCTTGACACTGATAGAGTTCACGCATGGGGATGCCGGAAC TACAA  
GCTTTTGAAACTTTGGTGGA  
CTCATTTGTGTTCTTGGACAAGAACAAAGATGGTTATGTTAGTCGAAGCGAGATGGTTG  
ATGCCATAAATGAAACTACAA  
CTGGCGAGCGGTCTTCTGGGCGCATAGCTATGAGAAGATTCGGTATCTCTTCCCCTCTT  
TATTTTACATGGGCGGGTTG  
GGTAATGGTTCAAAACACGTTTGTTCAAATTTCTAAAATGTAGGGTGTTTTTGTAAAT  
AACCCACTCAGAATGGTTCAG  
ATTAGTAAATCCCCATATTATTACAATGATAACCTGATTTTTTTGAATAGTTCGATGTAGGA  
GGTTAATCCTTATTTTCTC  
GTAGCTATATTTTCTCTATGACCGATTCAACACCTTTAAAGCAATATAATACTTCAAAATT  
ACCACCTGTTTTGCACCTA  
GAATGCTTATAAAAGTTGCTAACATTGTGTTTTTTGTATTTCGCAGAAGAGATGGATTGG  
GATAAAAATGGAATGGTGAAC  
TTCAAGGAGTTCATCTTTGCCTTCGAGAAATGGATTGGAATCGAGGATGGCGAGGAGG  
ATGAAGAAGAGGTAGCAGACGA  
GCAAGAATGA

>CsCML54

ATGGCATCAACCAATAATATGCAATCTGAGTTCCAAGATTACTTGCCATTAATGGCTGAT  
AAGTTGGGTGGTGATGGTTT  
AATACAAGAACTATGTAATGGGTTTTCAGTTACTTATGGATCAAGATAAAGGGGTGATTA  
CTTTTGATAGTTTGAAGAAGA  
ATTCATCAGTTTTTGGGGCTTGAAGGATTGAGTGATGATGAAGTCATGAGTATGCTGAAA  
GAAGGTGATTTTGATGGTGAT  
GGTGCTTTGAATCAAATGGAGTTTTGTGTTCTTATGTTTAGATTAAAGTCCGAATTTGATG  
GATCAATCTGAATACTTGTT  
GGAAGAAGCTTTGGAACAAGAGTTAAATAATTTCAATACTGA

>CsCML55

ATGACAACCAATTATAATTCTAGTTTTTCATGATTTCTTGCCGTTAATGGCGGATAAGTTG  
GGTGGTGATGGTTTGGTAGA  
TGA ACTATGCAAAGGGTTCGAGTTGCTGATGGATCAAGATAAAGGGGTGATTACTTTTG  
ATAGTTTGAAGAAGAATTCAT  
CAGTTTTGGGGCTTGAAGGATTGAGTGATGATGAAGTTATGAGTATGTTGAAAGAAGG  
TGATTTTGATGGTGATGGTGCT  
TTGAATCAAATGGAGTTTTGTGTTCTTATGTTTAGATTAAAGTCCAAATTTAATGGATCAA  
TCTGAATACTTGTTGGAAGC  
AGCTCTTGAACAAGAATTTAATTATTTGTGA

>CsCML56

ATGAAAGCCGCTAGTAATAGCCCCATGGGCACATTATTTTAGTACATCAATTAGAAATTT  
TAAAAGTGGGAATCTTGATA  
GCCGGATCATATATACTAATATGTTTCGTGTTTAACTACAGTTACCGGTCTGTTTAACT  
CAAGAGGTAGCTCAAGAGT  
ATGTCGTGACTGGAGTTGGTTTGCTAGCCGGATCAACGATATTCCTTCTCACTTTATTAT  
GGGGAACCTTGATCATTATT  
GGAAGCCAAAAGTTTTCTTCAGAATCGGGTGCCAGTACTTCCGTGGATCCTACCCAAT  
GCCCAAACAAGAAATTCTTCTC  
ATTTCTTACTAGTTAGATTCAATCCTTCATCACAACTACTACCCGGCCTTTATTTAAATT  
CATAGACACGTAACGTAAG  
CCATCATTTTTTAAACGTGTTATTGTATGATTTCAAGGTTCTGGTGTAACCTACAGACCCCGA  
GACATGTACAGCGGCGCAA  
TCATGCTTCTGTCAGTTATACCGTTTCTGTTTCTGTTGATCCCGAAGTTGTTTGGCATGA  
CGTATGCACCTCATGGATAC  
ATTTTTTTAATAGCACTTCCTGTTTCAGTTACCTTCTTGCTGGTATACTTCATTTATCAGG  
TATGTATGTACATGTTTGT  
CTGCTGTTTATGCGGTGAACCTGAATTTATAGAAAATAAAAGTAGCTAGATTATTTTATA  
TGAGCTTAATCTGTTACTAT  
AAGCAATAACTAGAATTGGATATGTGTCTTATCAGTTTGCTTCTTAAAGCTGTTGAAAAT  
GGGTCGGATTGACGTCCCAT  
TTTTATTTCCATATTGTAAAATTTCTCTAGAAAAAGTATTTTATTTTGTATAATTTGGTTT  
AGGAGGATGATGATACTA  
GAATTAACTTTGGGCGACATTCAATACATTTTCATATCTAGCATTTTGTTTAAAAAACA  
ATCTCAAATCGATTCAATAC  
ATTTTCATATCTAGCATTTTGTTTAAAAAAAGTTGGTGGAATGAAATTGCCTCCTCTACT  
TTACAAAATATTCATGTTTT  
TCACTGTTAGAGTCTTCTTCTTTCTGTTCTCCTTATTCATACACTGCACATAGCATATTAG  
CATAGTGACTTTTGTCAAG  
AAAATAACCACAATGATCCTTAGAAGATTAACTAATGAAAGTGGGTTCTTTTTTGTAC  
TTTCATCGTCATCATTTTGAA  
TTTGTTTCATGTGCAGGTGTTTGAGCCTTCAATTCAAAAGAGACGATTGTCATACGTCAA  
ACACGAGCATTTAGTTTTAGA  
CATACTAAAACATTTACAGGAGCAAATCCCAGAAAATATACTCGCTGAAGATGGTTCAG  
TCAACCTGCCTGCTATAAAAA  
GGTCCACAACCTTTTCCAAAAGAATATTTTTTAACGTGTGTTTCCAGTAAGATCAATTTA  
ATTATGGATTTTCAGTTTGT  
TTAAGAAGATTGATCAAGATGGAGATGACATCATATCTTTTTCTGAGCTCAAAGAACTT  
CTCGAAAGTATTAAGTTCAGG  
CAATTAAAATCGGACAAACAGAAAACATTCGATCAACTGATAAAAGAATTTGATTCTG  
ATGGTAACGCACAAGTATCGCT  
AGATGAATTCATCCATCGGTTTCACAGAATGGCTTGATGAGGCTAAAAATGAATTATCTG  
AGGTATTTATCTTATTATTAA  
TTCGTGCTCACAATTTTAGACATCTTCGCCAGCCTGACTGCAGAATGACATCAGTAAT

TAATAGTCTAATAAACTTTTT  
CTAGTGAATCAAACCTTTATATCATATATTAAGTTGTTGAATTTATTCAAAGGCAGT  
ATCAAATACTAATCTGAAGA  
TGACTAGGTTGACCCAGCGAACTCTACATTTGCTCTCGGAGATCATCCAACTACTCAT  
ATCTTTTCCATTACTAACATG  
AATGATTGTAACCTTACTTTTCTGCACGTTAGATGACAAAGATATGATAATGTTGAAATCT  
TTTTAAAAAAGGCGATTGCT  
TACTTTTACGTTCTGAAAGATTAGTAATTATTAAACAAGATAGGATACATACTTCCGTGG  
CCTCTAGAGTAGTTTCTACT  
GTTGGTGAGGGCTAATGAAAATAGTTCTGCCTCGCACATCATCCCATTATATATAAAGG  
GAGAATGATTCTGTAATAT  
CTTTTTTTCAGGTCGTCAAACCATTTGGTTCAAACCAAAAGGAATGAAGATGACATGAC  
GCAAGTCCTCGTATCTGAAATT  
ATCGGCAATGCTAAAAGCTCTCCACTAGGGAAGTTTTACAAAGAAGATGGAACACCGG  
ACATATCTGCCATAAAAAAGTA  
AGACAATTATCGTTAGCATCTAGAAAGAAAAACAAAGTCTTTTATCAACCACCTGATT  
CCTGTGGAAATTAATTTTAGA  
TTGTTTAGGAGCTTGGATGTCAACAAAGATGGTTCTGTGTCGTTAACCGAGTTGAAAA  
AACTTACAATGCATGTCAACTT  
GGGTGAGACATCATGGAATGTGGATGAAACAACATCTCGCATAATGCAAATCTTGATA  
CAAATGGAGATAAAGAGATCG  
ATGAACAGGAATTCGTTGATGGATTGAAAAGAAATTGGTGAACATAACTAATGACCG  
ATCCAAGACATCTGGGCCTAAA  
GATGTATCACGGGTAAAGTAGGTGACCTTTGCCGTTGAATAAGCTAAAATTACTAACTT  
CAAAGTTGACGTGACTTTTTT  
TTTTAATTCTAAACAAGTTTTAATACTGCTTTGAATTTTAAAGAAATGATTCAAATAC  
AAAAATCGTTGGTGAAGAAC  
CTGTAATGATATGGGTTTAACCTAAAAAGTCAGGGTGTTTATGACTATGCAGAAAGCAT  
GCAAAAAATGGAAAGGTGATA  
ATGTGGATAGATCTGTGTGGGGATGGACAAAGGCTATAATGCTACTGGTGCTCGGGATA  
GCAATGTTGGCTCTGATGGCT  
GAACCTCTTATACACAGTGTTCAAATGTCTCCAACCTCGGCTGCCATGCCGTCTTTTT  
CATATCGTTTATCTTGTTCC  
ATTAGCCACAAATGCTAGAGCAGCTATCTCTGCAATCCGAACTGCAAGTCAAGGGAAA  
GAACGAACACTTCATTAACAT  
TTTCTGAGGTTTGTGTTTTATCATATAGCAATCTTGTTTGGGATTCATAAAGGCATTACAT  
ATAAAAATTGTTAAAAGTC  
TGTGTACTTTTCAGAACTTTTCTCATATATCATACGGTTATCCACATTCATATAGATAATAC  
TCCGTAAATGAGAAGTCA  
TAAATGCCATGCATGCCTAATATTATGTGCTTTTTTCATATGTATAGTTTAAATGTTT  
TATAAATAAAACATGAAA  
GTTTCTATGCTATTTTCTTACAGCATGTACATTTGATCACTAAAACATCTGCGAGTCTGT  
TACGGTTTGTGCTTTTTTT  
CATCTGTAGTGCGTATGCCAGCCTTGGCTGGCTTTTGACAAGCAAGTTTGATGATAGAA



CATGTCTTTCCTTTTATGCTT  
TTTTCTATATGTACATCTTAGAGGCGGCGAGATGGTTGTGTTGGGGAAGGGTTGTTGGA  
CTTAATGTTATAGAAGAAAAG  
ATTAGGGTAGTTTAGTATAATTTTATGTTATGTATTCTGTAAAGTTTAGGTATAAACCGACC  
CATTGTATTGGGTTGGGTC  
ATATAACCGTTTTTAAAGAATTGTAACATTTAGTTTTAGTTGCATCGTTTACTTTTAGAGA  
ACCGGTATGCCTCAAGTTCT  
TGGCACCGATTCAATAGGTATATATAGGTTAGATTTCTGTAAACAAATTAATTCCAATATA  
TCAATACAACATCAATCGT  
TTATAATAATACAATATTCAGTTCTTATATTCAACTCTTTATATCTTTCTGCTGGTGACAA  
TACGCTTCTGTCCCAAAC  
TTCTGTAAACACTCCGGTGTTAATCCAGACCGATTCAAGAGCCTGTACAATCCGAAGG  
AAGAAAGCAACAATTGGCATCA  
GAGCTAAAGGATAATCGACCCAGGGAAAGACGAAAACAACAATTCCTGTAACCGTTG  
ATTCAGAAGCAAGATAGAAGAA  
AAACGATTTCTGTTTGAAATCTATTTACCGAACCAAAAAAGGAACAACACAGAAATT  
GATCAGAAGGAAGGATATTGGA  
ATCACGAATCAGGAAAAGCATCTCGAATCTGTGAAAGGAACGCACGTCTGTTGTTTCC  
CCTAATCGACCGGTTTTTTTAA  
TTCTCTCAACCTTTTTTACTTTTTTACTACTCCATATAAATTAGGAAATGTTTTTTTATTG  
ATTGTTAGTAAGATAGAAA  
TTCCCATAGCAAGAAAAAAAACCCGATTGATTAGAGTAGCAAAGACCGATTTTTTTA  
GATTCATAGTAAGACAAACGA  
ATTCTTCAAAAAATTCGTTTCAGCAAATAGCAAGTTAATCCGAACCCTTGTTGGTTCATA  
GCAAGTTAATCCGAATCCTTG  
TGGTTGATAGCAAGTTAATCCGAATCCTAGTGATTCTTAGCAAGTCAAACTGAATCCT  
TAGGTTTCATAGCAAGTTTTTC  
GAGCCTTAAGATTCAAATAGCAAGTTTCGAGCCTTTTCTTAGGTTCAAATAGCAAGTAG  
AACCCTTGATTCAAACCAGCA  
AGAAAGTAGAATCATTGGTTTTTAAATATCAGCAAGAAAGGATCAATTGTTTTGATCAA  
AGCAAAGCAAGCATGGTAGAA  
GATGACAAGCATGATAACGCATCAAGCAGTGCATCAATTCGAGAAGGGAATGTTTCAC  
TTCAATGTCCAAAACCTGACAGA  
TACTAATTATACAACCTTGGGCACTGATGATGAAAACAATATTAAAGGCGTATGGACTTT  
GGAAAGTGATTGATGGCATGA  
AAGAACTAGCGGCTAG

>CsCML57

ATGGGTAAGAATTCTTACTTTATTATTCTTCATTAGGCTTTTAGCTCTCATATATGATATCC  
TTGTTAAGTTGTAAAGAA  
AGCCTGAGAACTTATCTATTCAGTTTTATAACTTTCTTGTTTAATCTCATAATTTTCCTA  
AATCTTAGCTTAAACATGC  
TACTTTGTTAGCTTTTATTTCGAATAAAAATCCGAAATGGATGTTACTCTAGTGCTAGAGT  
TAAAGGGCGTTATATACGAG  
ATTTTGAATATTTATATGTTTCATGTATGTATGATGTATGGTGTTTTGAATCGGTTTCTTGAA

GGTACATCTCACACAAGC  
CCTTCATTCAAGTCGTTATCCAACAAAGTCGGAGTTATGCTATGTTGTTGCAATTCACA  
AAACCGATACGAGAGATTAGA  
CAATAAGCTCGAAAGAAAAATGATGGAGGTCAAACAGAACAGCATACAAGGTCAAAC  
CAGTTTCAGATCTATCGATAGCA  
TTATCTTAAGGTTCCCGCGGTTCAAAGAAGGATTAAAGGAGATTCAAGGTGTTTTTGA  
ACTATACGGTAAATCTAACTAG  
CTTAAACAGATTAAATACTTTTATCATAATTTTTGCGTTCTTCTGTGTGGTTTAAAGCTGCT  
TGCGATTCTGCAGATGAAG  
ATTCAAATGGAACCATTGATAACGAGGAGCTAAAGAGATGCTTACAGAAGCTGGAATT  
TCATTGTACCGAGCAGGAGATT  
AGAGATCTTTTCGAGTCTTGTGATGTGGATGGGAGCAATGGGATACAGTTTAACGAGTT  
TATTGTTCTTCTGTGTCTCAT  
TTATCTCTTAGACGGTCCTTCCTCATCATCTCATGTGGTAAATAACCATCTTCTCGTTTAT  
AGTAATATTTAGTTTCTTG  
ATAACTAAAGGTGACAATTTCAACCCATTTACTTATGAGTCGGTCGATTTTTGTCATGCG  
TTATCTACAATGGGTCAAAT  
GTGTCGAAAGTTGTTCAATTTTTTTTATATGCATATTAGGACTAGATAGTGTATTTATAAG  
AAAGTTAAGTTTTTCGACAA  
CATAGTGTTTTGGGTCAACCCAACTCGTCCAAATATTACCCGTTTTGATATAATTGTCAA  
TAAAATCAGACTAAAGAGAA  
TTTTGTTTCAGACATCGACAGTGGGGTCACCCGAGCTCAAAGCAACATTTGATACCATC  
ATCGAAGCTTTCTTGTTTCTT  
GATAAAAACGGTGATGGAAAGCTGAACAAAAAGGACATGATGAAGGCAATGAATGAA  
GACTTCCCAATGGAGAAATCACC  
TACACATATCACCAAGACCCGATTACAGTAATTTACTTGATTTAATACTACTACGAGTAAGTA  
TTTTTGTGGATTACAATAAC  
AAAAAATTTACATTTTCTTTTTTGGAATGTAGAAGAAATGGATTGGAACAAGGATGG  
TAAGGTGAGCTTCAGGGAGTT  
CTTGTTCTCTTAATTAATACTGGGTCGGGTAGAAATCCACTGATGAAGTACCTGAAACGG  
TGTTTTGA

>CsCML58

ATGTCATACTCCGGTTACAATCCAAACACCACCATTCCATCAGCCCCACCCGCACCACC  
CTCCCAATCCCACCAACCCGC  
AACCGCATACCCTTACCAACAACCACCACCTCAAAATTACAACAACCAACAAACCTAC  
AACCCCTCCGGGTATGGAGGCG  
GCTACGGGTCCCAATACGGGTCGTACCCGCCTCAACAAACGGTGTCGTTTCCACCAGG  
GACGCACCCCGAAGTGATTCTGA  
AGCTTCCAGGCTGTTGATTGATAGGAGTGGGTTTATTGATGCTAAGGAGCTTCAACA  
GGCTTTGACTCAGGCGTATCT  
CAAGTTTAGTTCCAGGACTATTAAGCTGCTCATGTTTCAGTTTAGGAACCCCACTGATC  
CCACACGAACCGGTGAGTTTA  
CGAGTTTTTAGGTTTTTTTAGCGCGTTTTTATTTACAATATAAATAATGTTTGTTTCGCAA  
CTAGTGTTTACCTTTTGGA

ACGCTAATGTAACTACAATTTTAGGGTGTCTTTGGCGCAGAGCGTTTAGGAGCAGTCA  
GCGTCGAGCGTTATGATTTTT  
AATGCTCGTTTGACAAACAACAAGTAGCTTTATCTAATTTTCGGAATGCACCTTTTCC  
ACGCTCCCTGAAGTAGCATTT  
AGGAGCGTCGAGCATTAGGAGCTGTTTTACATATTATGATTGAGGTGTAATCATAATGT  
GTAAACAACCTCCTAAATGT  
TCAACGCTCCTAAACGCTACTTCATGGAGTTTTGGAAAATGAGCATTCCGAAAAATTAG  
ATAAATCTACTTGCTGCTTGC  
TAAACGAGCATTAAAAATCATAACGCCCAACGCTTCTAAACGTTATGCGCCTACGTTAT  
TATCTTCTTTCTTTTATCTAA  
ATAATAAGTTTTTTGGAATCCATGTGACCTCATCACTGGAAGTGGTTCATTTTCGTTTCG  
CTTTTTTGATTTGGTTTCGT  
TGTATTAGTTGTGATATTATAATAGGTCAAGTCCTAATAGTAGTAGTAGTAGTAGTGT  
GAGTAACTATCAGTTTCTG  
TGTAATAATAGTAACTTTTTTGCAACCATCCAATTGTAATAATAGTAACTTTTTTGCAATGT  
TGATGTGTGTCAACATGTT  
ATTATATAAAAGTCACTATTATCGCACAAAAAACTTGAAGTTACTTATACTATGGCTATG  
TTTGGCAAACCTAGCAGTAT  
TATGAAAGCGTGGCGTTTGTTGTATGTCTACTTATAAAGTGTAAGTGCCTTAAAGCTA  
AGCACATTTTGTTAGCGTTA  
CAAATAGGAGCTTTTAAACACAATCTAAATCTAAACGCTTGTTAACAAGCTTTTTATT  
CTAAATGCTCGTCACCAAACCT  
CAGACTATTTATGACGTTTTTTCTAGGGGCATTACGAGGATTAGGAATTGAGATATACTA  
TTTGTTACTATATTATGCAA  
AACAAAACATAACTATATGATTAGATGTGTCTATGGTAAATATATAATCTACCGGGTTGTA  
TATAAAAGTGTTGGGATGT  
GCATATGGTGTTTATTTGAAGTTGTGATAAACTGATAATCAGATGGTCTTACTTTTAAAT  
GATCCTTAAATAAGGAGATA  
ATCGGAATCGGTTTTATTTGCAACTACGCGTAAGTTGGTTATACAAAACCTTATGGATAAG  
TAGAATTAGTTTCACTATGC  
ACAAACACTAGATACTTGCTGAGTTGTGGAGACTGATGGTTGCCACATGAGGAGGTGC  
CCGCGCCTCAGTCGGTCTATAT  
GCCATTTTAGGTCCAAACTAATTAATAATTAGGCGAGTAACGGCAAAAAAATTGTTTTT  
AGGTTGCTTTACATGTACATT  
GCTAGATTTGTTTAACTTATTTTGAGCAAAGAAGTAATTAGAAACCACTTTTATATCTG  
TTAAGCAGATTGAAATAAGC  
CATCCGGTAGATGACCTTTTTTTGGGTAAAGGGTTTATACCCGGTGAATATAAATAAGCC  
ATCCGGTACATGACCTTAGT  
ATCTGATTATCACAACCTTGGACAGTTGCCTCCCGTTTTCTTGTAACCAACTATTATTG  
ATTATCGAAATTGTACGCAC  
GGTTGCAGCGTTTTGTTTGTAGTGTCTATTTTGATGATTTGACATCACATAATTACTTT  
AAGAACTCAATGCAAACAT  
TCCTAAGTCTTGCTGAACCATGTACATGCACTCATGACTCATCTTATTTATTGCAATGAT  
CGTGTTTTAGATTTTGATTA

TTTCGTTTAACTTGTTAAAGTAGGCATTGTCATTTCTCCTGATGTGCATTGTATATACTTA  
TGTGACTTTCTTTTGGTGT  
TTTACAGGTCCTAAAGAGTTTGCTGAGTTATGGAGTTGTCTTGGCCAATGGCGGGTGA  
GTGATCGTATTTCAATTATTGTA  
TAAATATAAATATTGGGTGCACGATTTTTTCCACATAGATAGCAGAAGAGTGAGCAGTC  
TTAAAGGAACTTGTTTTACTG  
GCTGGATTGCAAATTGTGGCGTATAACTTCTATTTGGGGTAGTGAACGTTGTTCACCTT  
ACCCTCAAAATAGGCTAATG  
TGGCTTCATTATTTGTGAATTTAGGGTAATCCGACGGGTATACGGTTAATGATGTGGCA  
GATGATGCATTAAAACTTTT  
TACTATGTTGACTTTCTTTTTACATGGCTCTGAATCGTTGATATCGCATAGTAAAGCAATT  
AGCTTACTAGATTACCTCA  
AATAAAACTATTGGAACCTCATTAAAGTACTTCTTGGGTAAAAAAGGTTACCATCCAT  
AAAAGAAATCAGACTTAAGTA  
TGTTATCTTTGGTGGCGTTTGTATTGTTTTCTTTGTGCACTGTAGGCGATCTTTGAG  
AGGTTTGACAGGGATCGAAG  
TGGAAGATTGATCTAGCGGAACCTAAGAGATGCCTTATACAGTCTTGGATATGCAATTC  
CACCTTCTGTCCTACAACCTCT  
TGATTTCAAAATACGACGACCAAAGTGGAAGGAGGGTAGATCTGTCCTTTGACAGCTT  
TGTTGAGTAAGTCTTTTACTTA  
AACTTAGTTTATCACATTCACATTTTACGTTTACAGCTTGTTATTTGTCTTAGTTCTAAT  
GTTTTACCTAAAATTTTAA  
TTTTCAGGTGCGGAATGATTATAAAGGTGAGCAGCAAGTTCATCCCTTATCCCTCACTC  
TATTTCCATTTTTTTTTTCTT  
TATAATAATTATGTGATGATGCTCAGATTTAGAGTTGGCCTTATAAATGAGTGATATGGAT  
TTGGTTTATAACTGGTCAT  
ATGGGTCCAACGGGTTGATACTTGTCAAAAGTCTATCTTGTGATGCATACAACCTTCTA  
AATTGTTTTTTTTTAAGCAAAT  
TTGATTTTATTGTACCTATAATCTTAATCTTAATTAACATTGTAACACGTCCATTACTTATA  
GAAAATGAAAAATCATAAC  
AACGTTGGGCAATAAAGTATTGGCAGGTCAACTCAACCCAATTTGGCCCTTTTCACCT  
CACTAGAAATGACCCCTTTTA  
GGCGTATAACCAGAACCATTGTAACCAGACGAAACCAAACCACATCTGCCTCTTCTAC  
TCATAAATTAGTATTTATTTCT  
TGATCCCTGTGAAATTTACATACCAAGTGTTATTGTATCCATGAATAATTGATGAAAAAG  
ATCATCTTGTTGACTCGAAA  
TCATTATACCAAGGTTTTGTGACAGAGACAATTGGTAGATAGGTAAATTTTTCAGTTTT  
CATAGGAGAAGAACTAGAA  
GCATTAGGGTCAACCTGTAAACTTAAATTGCTATCCCTTTTTTAGAGCATGAGTAGTGTT  
TTTTTATCGTTATCTTGTT  
CTTTATGTGTTTGAAACACGTAATTTTACGGGTTTGACGGAGAAGTTCAAGGAGAAAGA  
TACTAGGTACACGGGTTTACGCC  
ACGCTTTCATACGAGACATTTATGACCATGGTCATCCCATTTCTTGTAGCAGAATAA  
>CsCML59

ATGGCCTTCGGTTCTCAGTCGAATGTTCTCGATCCTCCTCCAAAGTTTGATATGTACAA  
ATATACTTTTGTGTCATGACTGA  
CGCTGACCTGGAGGGTGTGTCGCTGGGTATGGTATATCTCTAACAGTGCTAAAGACTT  
GGTCAGAAAAATGCTTATTAG  
AGACCCAGAAAGCGGATAACGGCTCATGGAGTTCTTTGTAAGTCTAACTTGTTCTTTG  
TCATTTTTTTTTGTTTCAATT  
AGGGCGTGCTTGGAAGTGTGTTTTGGATGTGATTATATATTTGATTATGCCATTATGGTG  
TTTTAACTCACATAATTATT  
TTCAAGCTTTGGGTATGCTAAAATTATTTATTCCATAGCACGTGCTCACATTCAAAATGC  
AATGCCAAACGCTCTATTAG  
ATTATTATGCACTATAGTTCTTCATCACTGTAGGCCACCCTTGGATAAGTGAAGATGGTG  
TTGCTCCAGACAAGCCTCTT  
GATTCTGCAGTCTTGAGCCGCTTAACTCAGTTTTCTGCCATGAACAAGCTCAAAAGAA  
TGGCTCTTAGGGTAAGCAGCAC  
TTCAAGAATTTATTTATCTATAAGGAAAACCAGTACTTTAAGAAATAACCCGATAACTTA  
ACATATTACTGCCAAATGTC  
AACTTTGCCCTTACCCTTCTTGTGTTTCTCACAGGTCATCGTGTCAAACTCTCAGAAG  
AAGAACTGCAGGCTTAAAAC  
AAATGTTCAAGATGATAGACACAGACAAGAGTGGTTATATTACATTTGAAGAACTAAA  
GGCTGGACTCAAGCGATTTCGGT  
TCTACTCTTAATGAGTCTGAGATTTATGATCTAATGCAATCTGTAAGTAAATAATTTTTTT  
ATAAATTTTTTTGCATTGG  
TTTTCTTTGTTGCTGAATATAAATGATCTTTGATTCTTTAACTGAAAATGCAGGCGGAT  
ATTGATAATGGTACTATCGA  
CTATGAAGAATTTGTAGCATCAACGTTACATATGAACAAAGTTGATAGAGACGATCATT  
TGTTTGCTGCTTTTTTCATATT  
TTGACAAAGATGATAGTGGTTATATAACTCTTGATGAACTCCAACAAGCGTGCAAAGA  
GTTTGGATTAGATGATGTTTCAT  
TTAGAAGAAATTATCAAAGAAGCTGACCAAAACAATGTACGTTTTTCACTACCATAA  
>CsCML60  
ATGGCGGAACAACACTGACTGAAGAACAATGCTGAGTTCAAGGAAGCTTTCAGCCTC  
TTTGACAAAGACGGTGATGGTAT  
ATTTTTTTCTCGACATCTCAAATCCTTTTTTTTTTTTTTTTTTTTTTAATAAAATGATTTCT  
TGTTACTAGTTAGATTTG  
TTTTTACTAGTTTGTTATAGTTTATTACTACCTTAGTATAAGTAAATAAACAAACATTTGA  
ACATTTGTTTGGTCAAAAC  
TCGGTCAACACACGGTCAAAAGTTGGTTTCAAATATATATCTATGAAATTTGTATATACA  
AAATCAATCTGAGTATTTCA  
CGCCGTGTGGAGTTTTACAACCTTGACTTGTATGTGTAGTATTCTAAGCATTTTTGGGCA  
TCATAAATGATGGCTAACTA  
TATGTGCCTTGAATCGTTTACTAGCCTAAATAGAAAATGAGACTTGTATGTAGGTTTCAC  
TTGTTAATTTTCGCCTTCTCT  
TGGGTCCCCTGAATAAGTGTATGGATCCACGGGGATCGTTTAACTTTTGTTAGTTTTAG  
GGTAATTGCAAAATTTACATG

TTAATTTTTTTTAAAGGCTTTTTTAAACCTAAGTATTTGAAAGAAGTTTCAACAAAGCTGAT  
TTATACTTTAACTCAACTAC  
AAAGTAAAATAACATGTTCCAACAACTCCATACCCCGCTCTGGCGGGATTGGATATGTT  
GTTGTTGTTGTCTACAGTCAT  
G TTCATAAGGTTTCATTTCTACACTTTAAATTGCTAAACAAATGTTTTTTTTTGT TTATGAC  
ATTCGTTGATATTCTAGCT  
GTTTTCAAGTTTATATCTGATCCAATATGATCTTCTTATGATGCTATAGTGGTTCGATATAT  
TATTTTTCTGGTGCAA  
CTCTGTCCCCCTTTATAATTAAGTTCTACTGTTAGCGTTAAAAAAGTAATATAGTGACGG  
GTTGTTTTTCATATTGAATAG  
TTGTTGGGATGTTTACACTTAGATACGCTTGTGAAGAACATTGACTGAACTGATTATCA  
AATCTTGGCTAAATGTTCAAT  
GGTAGATAATTACTACACGTCACTGTAAGTATCTCACAACGTTGATGAAAGAAA  
TGGTTTTCTCGCCTTTAACAGG  
CTGAAATGTACGAGAAGGTTTAGTGTGTACCACCTGTCACCTCCTAGATGGTTTTATTT  
ATAGATTCAAAATATTGTAGT  
TAACAATTTAGCACATAAGCTTCTTTAGAAAAAATATTTTAAAGTTTGACAAGAAAAAA  
GTCCTCTCTGTTTGATCTTCA  
ACATGAACCCGTTTGACTCGTTCCCATCTTGGCCCAACATATTGAGAGTGTTCTGGCTA  
CCTTATTTGTAAATATTTCTA  
G TACTTAAGATATGCTGAGCTTTCTTTTGTGTTGTTAACTCGAATTCTGTTTTTTCATAGTTT  
TATTAGAATAGACCTATCA  
TGGATTCAACAACTCCGGCATCTTAACCTCCAATTTGCACATATGAAACTCCTATGTC  
TTCTATGCAATTTGTTTTTT  
GTTTTTTTTTCCTTTACGGGGGAGTGCCTGCTATTTACATCGGTTGGCCTGTTTCTTTAAC  
TGTTAATTACTTAGTTACAG  
TGTTTAGCTTATTTTTTTGTTTTTATCTTGGAGCTCAATGGAAATTCAATATTGTAGGCTG  
TATCACCACCAAAGAGTTG  
GGGACAGTTATGAGATCATTGGGTCAGAATCCTACTGAAGCTGAACTGCAAGATATGAT  
CAATGAAGTTGATGCTGATCA  
GAATGGAACAATCGATTTCCCTGAGTTTCTGAACCTGATGGCCAGGAAAATGAAGGTG  
GATATTAATAACTCTGTTGCTC  
TAATATTCTATTGGAAATGTGCTCTGTTATTACTATATTTAGAGTTCAGGACTACTCATCA  
TGATCTCGTAGGACTGATA  
TGAAGCCTGTGTAGGTGGAAAACCTTGGGAGGTGGGTAACAAGTAAAAATGGCTCATG  
TCAAACAGAACAGAACGAACTGA  
GCCGGTTTAAACAAAACACTTGTGCAGTATATGATCACAAAAAATATGTCATATTACAA  
CATATATCTATTAATTTATTC  
CAACAATTTAGTATTTGCATTACAAGATACACTTTGGGCGACATGTGAACTGTTTCTTTA  
TAGCTATTATGTTTCCTTT  
ACCCATGACCTGTAAAGATATAACATAAATTAATTCAGCCCACTAATTTGTTATTGGGC  
GAAGTAAAACTAAAAAGA  
TGAGCATAAAATAATGTTTGCAAAGTTGATCAAAATGCTGTGCTCTTTTTTTGAAGGAC  
ACTGATTTCGGAGGAGGAACTC

AAGGAAGCTTTCAAGGTCTTTGATAAGGATCAGAATGGATACATTTCTGCTGCTGAAGT  
ATGTAACCTAACTACTCTTGC  
TTATCTCTGTAATTATATGTGCCAAAGCTGGCAGGTCTTGGTGTTGACCCGAAGCACTT  
TTTGATTATTTTCTGTGAAGT  
TATTAACAGTTAATCCGTGTTAGTTTGTGAAGTTGATAAGGGTTATGTTATTTCAGTAAA  
ATTCTAACTTTTTTAACATGT  
GATTTTGGATGACTTGTTTAGTTTTCTCACATTTGACATGTGTGCAGCTTCGCCATGTGA  
TGACAAACCTCGGGGAGAAG  
TTAACTGATGAAGAAGTGGATGAAATGATCCGTGAAGCTGATATGGATGGTGATGGTCA  
AGTGAATTACGAGGAGTTTGT  
GAGGATGATGCTTGCCAAGTGA

>CsCaM3

ATGAGGTCTCTAGGACAAAACCCAACCGAGGCTGAACTTCAAGATATGATCAACGAAG  
TCGATGCTGATGGCAATGGTAC  
TATTGATTTCCCTGAGTTTCTCAACTTGATGGCCCGCAAGATGAAGGACACTGATTCTG  
AGGAAGAGCTCAAGGAGGCTT  
TCCGGGTTTTTGACAAGGACCAAAAATGGTTTCATCTCTGCGGCTGAGCTTCGTACAGT  
CATAACTAATCTTGGTGAGAAG  
TTGACAGATGAGGAAGTCGATGAGATGATCCGTGAAGCTTGA

>CsCML61

ATGAGTAAATCGAACGATTACAAGCGTGTATTTGATCACTTTGATGAAGACAGCAATGG  
CATGGTCTCACCATCCGAGCT  
ACACCGCCGTGTAGGCATGATTTGTCACGAGCAAGTTTTAATAGAAGATGTACAAGTTA  
TAGTCGAGTCATTGCATGGGA  
GCAAAGTTGACGGGCATGAACTAGGATTTGACGATTTTCGTTAGTTTAATGGAGAGCGA  
TAATGAAGATGAGAAGGTTGAG  
GATTTAAGGAAGGCTTTTAGATTGTATGAAAACGATGGAAACGATTGTATAACACCGAA  
AAGCTTGAATCGGATGTTGGA  
TCGATTAGGTGAGTCGAGAAGTGTTGATGAGTGTGTTGGTATGATTAATCAGTTTGATC  
TGAATGGTGATGGTGTGCTTA  
ACTTTGAAGAGTTTAAAGCAATGATGCTTTGA

>CsCML62

ATGAATAGTTGTGAAGTTTTGGTAAAATCCCTTCAAGCTTCGGTTCAATCGCTATTGAC  
CCATGTTTCAATAACATGGAA  
CAAGTTAGGATCCATTTCCACATCACTTGACCTAAATGAGACCGTAAAGAAAGAGTTC  
ATGACCCTTGGAGAGATAAACG  
TGATCATGGGGCAACTAGGGCTCCAACAACGTTGTAGTGATCAGGATAGCAATATTGAC  
ATTTTATCGGTGTTTGATGAT  
GAGGAACCAACTTTGGAAGAAGTTAAGGTGGCTTTTGACGTGTTTGATGAGAACTCG  
GACGGTTTCATAGATGAGAATGA  
GTTGCGTGACATGTTATGCAAGTTAGGAAAACAAGAAAACGCAATGTAAAGGAATGC  
CGGAGTATGATAAAAGGATTG  
ATGTCAATGGGGATGGGCTCATTGACTTTGATGAATTTGTTAGGCTCATGGAGACATGT  
TCTTTTAA

>CsCML63

ATGGGTTTAAAGAATCTATTCAACCGTAAAACCAAGAACACGACCAAAGACAATACTA  
CTATGGTCTGAAGAAACAATCGC  
CACAAACACAACGTTGCCCGTTGTACCTCGTCAACAAACCAAGGAACAACAACCTAGA  
GCAAGTTTTCAAGAAACTCGACG  
TGAACAACGATGGAAAAATCTCTTACTCCGAGCTAGGATCAGTGATGGGGAGCCTAGC  
AGGAAACCAACCAACGGACGAC  
GAGTTAAAGAAAATGATCATGGAAGTTGATAAAGACGGGGACGGGTTCATAGACTTGG  
AAGAGTTTATTGAGTTGAACAC  
AAAAGTCGATTCTAGTGAGTTGTTGGAGCTTATAGAAAAAGCGTTTTCCATGTTTGATG  
TTGATAAAAACGGCTTGATTA  
CGGTTGAAGAGTTGTTGAGGGTTATGCGGAGCTTGCATGAAGATTATAGTATTGAAGAG  
TGCAAGAAGATGATTGCTGGA  
GTTGATCAAGATGGTGATGGTATGATTAATTTGAATGAGTTTAAGGTTATGATGATGAGT  
GGAGTAAGGTCAGATGTTAG  
TGAATCTTGA

>CsCML64

ATGAATACAGGCGAACCATCAACTTCATCTTCTCCGGTCAAATTCTTCCGACCCCCAC  
CACCATATCACCTCCGTCATC  
GTCTCCATTACCAACTCCGTGCACCGACGACATCCATCAACTCTTCAACTACTTCGATG  
AAAATGGCGACGGTAAAATAA  
CCGCAACGGAGCTTCAAAACCGGTTAAAAACCGTCGCCGGAGATGAAGTTCAGTTATC  
CGACGAGGAGGCGGAGATGGCG  
GTGAGGTCATCGGATGCTGACGGTGACGGTGTGTTAGGGTTTGATGATTTACGAAGA  
TGATGAAGGAAGGGGCGGAGGA  
GGAGTTGCGAGAGGCGTTTTCGGATGTATTCAGCGAAATCGGGGACTGTTATTACGGCC  
AACAGTTTGAGAAGGATGTTGC  
GGCGGTTGGGCCAAAGTACGGTTACGGTGGAGGAGTGTAAGGGGATGATTGGGAGAT  
TTGATGTTAATGGTGACGCCGTG  
TTGGATTACGATGAGTTTCGAGCTATGATGAGTTAG

>CsCML65

ATGGAAACACAAACACCTACATCTAAACACGCTCCTCTTCTTAAATCATGTTCCAACGG  
TTCGTTTTCGTCTGCGTTCACC  
CAGTTTAAACTCCTTACGTCTTCGTGCAATCTTTGATCTATTTCGACTCTAATCACGACTC  
ATTTATCACTATAGAAGAAA  
TCACACGTGCCTTGACCCTTCTAGGCCTCGACACCAATGCCTCGGATTTGGACACTATG  
ATCAAATCATACGTGCATCCA  
GGCAACGTTGGGCTAACCTATGAGGACTTTGTGACATTACATAGGTCCATAAATGACTT  
GTTTTTCGGTATGGACGAGGT  
AGAGGAAGCTGTGGGAAGTAAAGAGGACCAAGAGGAGGCGGACTTAAACGAGGCGT  
TTAAGGTTTTTTGATGAGAACGGGG  
ACGGGTTTATATCGGCTGCAGAGTTGCAAATGGTGCTTGGAAGCTCGGCTTTACTGA  
AGCTATTGAGATGGGGAGAGTT  
AAGATGATGATCTCGTCTGTTGATCTTAACCATGACGGATGCGTTGACTTTTCTGAGTTT



AAAGACATGATGCGGGTGCT  
CCAATAG  
>CsCML66  
ATGTGTGATGACTCAGGCGTGCCACATAGATTCGTGCTTGATATACAAGTTTTGCAAGA  
GATCTCATTGCTAGATTCTGT  
TGCTGAAACGGCAGTTGAGATGATGAACATCCTAAAGAAAATAAAGAAAAATGTCAA  
AACCGCATCAAAGCCTATTTCAA  
ATAAAATAAAACGTATGTTTAAATAAGTCCGCCCCACGGTATCCTATTTGCTTGTTGTAC  
ATAAATGGAATGACGTACAC  
AGTATTGATATTCGTCACTCTTGAATAAACACACTTATTTTTTCATCGTATAAATGAGCAA  
CACACACACACACGTTAC  
ACACACCAAAGTAGAAACGTAAGAATTAAGTTTCAGAAAATGGAACAAAAGGTACTC  
CTTGATCAAACAACCTGATACAT  
GTTGCAAAGTTCATTTGTGAGAACAGAACCTAACTCAAGTAGAATGTATCAAATTCAC  
CCGTTATGAAATGCATCCCAA  
GCAGCTTTATCCCTGTCAGAAGCGATATTCTCATACTCTTATGCCTCTTCTTCAATTGCCT  
TAATTCCAGGTTGCAGCTT  
TAGTCGTCCCATATTACACCTTCGTTCCAGTTTATGTTTGTTAAAAATGCTATCCTGCTAT  
ACAAATTAGGATTTGCAAC  
ATGACTGAGACCCTCCATTACACACCTGTAAAGAGACGATATGAGTTACTATTTTACCC  
ATAATGAGGACCTGTCTAACC  
AAATATTGAAATGCAACATATGTAGTTAACATAATTATAAGCACAAAAGAATTGCTGGTA  
AAACTTTTGATTAATTAAGG  
CTTTGCTTGGACAATTGTATCTCATCTATAAAACAATATGTGTATCAATACTTATTTGGTA  
AACAACAACCTATAGTGCTT  
AACCGAACAATGAAATGACAGCAACACATACATATCGTTACTCTCTAAATTCATAACAA  
TTATCTAATGTGGAAATTCTT  
GTGTATCCTAATACTGATGAAAGGACATATACCTAAGCACCCCATCCTAGACCAGTTGA  
AATTATAGTAGAAGACTCAGA  
CCATGAACCATCTGGCCTTCGAGCAATATACCTTTTAACTGCCGTTGACTCTCTCAGC  
TAGAAACCCTTAAAAATGTGA  
TACCATCTTCAAAGACTTGATTGGAGAATCATGTAAATACAAAGAATATAATTGTAAAT  
AAAGAAAAACCAAAGACCCA  
AGAATAAATGTTACCTGCATAACCTTTCACCAAAGATCAATAACATGGTCTGCAAGAAC  
AACGGAATACATGCTATTTAA  
GTAAGTGATGACTAACTCAGGATAATTAGTAAAGACATTAACACCTTTACACAACCCA  
AGAAACACAAGACAACATGAA  
AAAAGAGTAATGAAGAGCAAAGATTTCTATAAAAAAAGGAAGACATATGAATACCATA  
GAAGTGTTGGGTTCTGGACAAA  
GTCTTGTTTATGTAATATCGAAAACGCCTCACATGCCCACGGCACATGACTATCTGCCA  
CCCTGAAATCGTTACATGAGC  
AACTATTAGCATAACATCATTCTTCTTAAAGAATAGAAAAAACACTTTTTTACATGACA  
GAATGTTTCATATAAAATTGT  
GGTGTGTTGTGGCAAGTTCACAAATAAGTGGTTATTTTGTAGCGAACAGAAGCAAACCTG

CTTAAACCAAAAATCCCATTGT  
GATAAGACAATAATATATTATATACAGACGTAATGCAATGCAGGGAGCAAGTTTCGGATA  
AAGGAATTCCAGAGATGCAT  
CTTAATTGTGTGAACCTGAACATATTAGGGTTTTGAGTTTTTTGTTTTTTTTTTAATCCG  
AATATTCCTAATAATAATG  
GATTTATGTTAATAATGGATTTATTCTCATTAAAATGGTGATAGGTTTATAAATTTGGACT  
TTAAAGATATAATCAAAGA  
CTTGCAAGATTTAATTCAAACATGTGTTGGTCTAGTGGTTATCATGTTTCTTTGTGGAC  
TAAGAGACCCAAGTTCAATT  
CTTGTTAAGCTTAAATTTTTTGAAAGAATAAATCCGAAAATTTAAATAAATCCGAAAATT  
GTCTAAAATTCAAATTAAT  
TAAATGTCTTCAAATAAAATAAATTTTAAAAATCCTTACATGGCATTAAATTTGTGATGAC  
ATGGCATAAAAATAATTAAA  
TGTCTTCAAATAAAATAAATTTTAAAAATGCTTACATGGCAACAATGTGATGACATGGC  
TAATAATGAATTACTGGGCAA  
TGAGGTGGCGTTTACGTGGCATTATCTACGTGTAACGCCTCCTGTTATATATAATATAGA  
GATATATATATATATATA  
TATATATATATATATATATATATATATATATATATATATATATATATATATATATCTATA  
TTATATATAACA  
GGAGGCATTTGGCATTAAATGTCACCTCAATGACACCTCAATGCCACCTCAATGCCACAT  
AAGCATTTTTGTGCCAACTAA  
GCAATTGTTAATTTTCGTTTTTTTTTTTTTTTTTTGGTAATTTTGGATTTTTTTAAGCAT  
TTTTTAAAATTGTTTATA  
AAAAAAGTCCCTTGCAAGGATTGAACCTTGGTTGTTTGGATAAATAACAAGTGTGTTT  
ACCACTTAGGCAACACGTTATT  
TTGATAATTATGTTGCATATTATAATCTATAAATGCTTATAATTATATTGGAATCCTATACTA  
AATACAATTCTTAGAAA  
TCTGTAATATTGACCATCTTAATGAGATAAGTATCAAATCTTTTACAATAATAATCTCATA  
CAAAACATTTTATCCATTA  
TTAAAATATCCGGATGTATATTTTTTCACAAAATAAAAAAAACCCTAATCATCAAAATTC  
TCTCCAAAACCTCCATCACAA  
TTTTAAGGTTTTAATGATTTTAATCTGATTTTTGCTTGTTATAATAAAAATAGCTGTTTGT  
TTTGCAGTTCTTGAAGCTT  
TGATAACATATGTTTTTGTTTTACTGAAGCTTTGTTATTCTCATGCAAAAACCTCTATTTGA  
GTTTAATAGGTCACTTTTT  
TTTACAGGCACCTTAATCCCTAATCATCAAAACTCTCACCATGAAGAAAACCTAATCTT  
GCATGGCTAAAGGTAAATATT  
ATGTAGCACTGAACAAAAGAAACCAATGGACCTGACGTATGCTTTTGATATCATTTTTT  
CTTAATTGATGTTTTGTATGA  
ATTTTGTGTCAGATGATCCAGAAAAGAAACCAAAAAGTATAGTTGATGTTGGTTGTGG  
AATAGGTGGTAGCTCAAGGTTT  
CTAGCTAAAAAGTACGGAGCTAAATGTCGTGGAATTACTCTCAACCCTGTACAAGCTG  
AGCGGGCTCAGGTACTAGCTGA  
TGCTCAAGGATTGGGCGATAAGGTACCAAGCTTAATCGTAATTCTTAGGAATTTGGGGG

TAAATGTTTAATTTGTTTTCT  
GAAGCAATAACCTTATCTTCGTATGAGTTAATTGTATGGAATGTAGTTAGCTCTAGCTCA  
ACAAAATATTGTGTAATATT  
TATATGCAATTGTGCTAACTTTTGAGGTGTATCTGGAAATTGTGGCAGTGAATGATCCTA  
ACCTAACTTCTTGAGTATCG  
ATTTTCATAACAAAAGAGTTTTAGCAACTGATACAATAGTTAATTCTGAAGGTGGATAATT  
TTTGTTGTTAGATGTCATCT  
GATGAAGTTATGTGTCGACATGAAAATCTTTTTTTTCGAATCCTCTTAACTCAGGAATTG  
GTTTATTATCTTCGCATCCTC  
TCAACATTTTCATATTGGTTATTGATTCGCATTTTCCACTTTAACAAATATTTTTTTGTATAT  
GTAGGGATACCTCATTAT  
ACCCTCCACTAATGATACTGTATTATGGCCAATGCGAGCCACTATCTGAAGTACCTCATC  
AAGGCATACCTCGGGTAAGT  
ATCTTGTTTTTGGATTCTTTTCAAGCTCAACTCGATGCATTAATACAAAAAGGCGATAC  
AAATAGCAATGGTTTGGTTGA  
TTTTTCTGAGTTTGTAGCACTCGTGGCACCCGAGCTTCTTTCTGCTAAATTGCCTTATAC  
AGATGATCAACTGAAACAGC  
TGTTTAAGATGTTTGATAGGGACGGAAATGGTTATATAATGGCTGCTGAGTTGGCTCATT  
CTATGGCGAAACTAGGACAT  
CCTTTGACGGCTGAGGAACTTACTGGGATGATCAAGGAAGCTGATACGGATGGGGATG  
GACGGATTAACTTTCAGGAGTT  
TTCTTGCGCGATTACTTCAGCTGCTTTTGATAATTCTTTTTCATGA

>CsCML67

ATGTGTCCAACAGGAACATCCTTATTTCCATCAAGAAACATAACCAACCTACGTTCCGC  
ATTCGACATCCTAGACGTGGA  
CCATGATGGCAAAATCAGCCATGAAGATCTCAAAACATCTTACTCCCATGCAGACGAC  
AACATCATAGGTACGATGATGA  
AAGTAGCTGACTCAAACAACAATGGGTACGTAGAATACGATGAGTTTGAGAAGGTGGT  
GTTGAAAACCTGATGGTAGTAAT  
GTTTATGGTGTTATGGAGGATGTGTTTAAGGCTATGGATTGTGATGGTGATGGAAAAGT  
TGGATATGGAGATTTAAGAAG  
CTATTTGAATATGGCTGGTTTAGATGTTAATGATGATGAGATTAAGGCCATGATAAGATT  
TGGTGGTGGTGGTGATTATG  
ATGATGGTGTTACTTTTGATGGATTATCAAGATATTGTCTCTTTGA

>CsCML68

ATGGCGAGAGTACTGGCCGTCCAACAACGTAAACAACCTACTTGAAATTTTAAACAGT  
TTGACATGGACTCAGATGGATC  
CTTAACATATCTTGAGCTAGCAGCCCTCCTTCGCTCTATAGGCCTTAATCTCTCGGGTGA  
CCAAATCTATACGCTCTTTA  
ATAAAATAGATTCTGATGGAAATGGGAAGGTTACATTTGAAGCATTTGTTGATGCAATG  
ACGATTGATGTGAAGACAGAA  
GAGATTGTTATTGATCAGAGACAACTTTTTGAAGCTTTTCGCTCATTTGATAGAGAGGG  
AAATGGATTCATCACACCCAC  
ACAACCTAGCTATATCAATGGCTAAGATGGGTTATCCATTGACATACCATGAGCTTGTAGC

GTTGTTTAAAAAGCCGGATA  
GAGATGAGGATGGTGTATTAGTTTTAAAGAATTCTCAACTATCATGGCGAAATCAGTA  
GCTGATATATTTGGGATGCAA  
GTTTCATAGAGGGTAAGAATTATACTTCATAATACTCTTTTTTTTTTAAATAATAGTAAGT  
AACATCAATATATTTCTG  
AAATACAAATTTATAAGAGAGATCTAAAAAGTTATTTTTTGGTTGTAATCTGATTGTGAG  
GGGGTCTAAAATTATACGCT  
TTATGAACGTCTTTATTAACGACGGTATTAGTACAGTGACGATGCTGTTAATATGAACCC  
TTTTACTAATAACTTTTCAC  
CATGATTAACAAATAATGTGTGGGTTACTGGATCACTATGGTGTTTTAGGCCTGGGAAA  
TTGCAGATAGTCGTTACTATT  
AATCGGTTGGACTCATACATCTAACGCACATATTGGTTTTATCTTTGTCTAGGTCTTTTTG  
TAGGACTCACTAGGACGTT  
GGAAAGATTGGTATCGGAGCTCGCTGATTTCTGTATAGAAGTGTGTAGGACGTTAGAAG  
TTAAAGTGGGGATGCAGAGAT  
TGACATCCCACCCACGTATGTAGTATTTGA

>CsCML69

ATGTCATCAAATAACGAAGCCAACTTTCATGATTTCTTACCCATAATGGCGGATAAACTA  
GGTGGTGAACGACTAATGGA  
TGAGTTATGTAACGGGTTCCGAATGCTAATGGACCCTATCAAACGTGTTGTCACGTTTG  
ATAGCTTAAAGAAAACTCGG  
CCGTATTGGGTATTGGAGACTTGACTAATGATGATGTGTTGAGTATGTTGAAAGAAGGC  
GATTTAGACGGTGATGGTGTT  
TTGAATCAGATGGAGTTTTGTGTTCTTATGTTTAGATTAAGTCCTGATTTGATGAAACAA  
TCTTGGTTTTTGTTAGAAGA  
AGCTTTAAGAACAATAGTTGAATTTGAATCTAATTAA

>CsCML70

ATGCTTACACTTGACCCGAAGAAGCGCATAACCTCTGCTCAAGTCCTTGGTATGTTTAA  
GTCTTATTTACATGTGCAAT  
CTTTAATCGTCAAAATAATTATTTATTCATAAATTCCGTGTCATTTTGAATCGTATAGAGC  
ATCCATGGATTAGAGAAGA  
CGGAGAAGCATCAGACAAACCAATCGACAGTGCGGTTCTTTCAAGGATGAAGCAATT  
AGAGCTATGACTAAACTCAAAA  
AACTTGCCTCAAGGTTTAATTTCTTCTTTAACATTGCCATTTTAAATGGGTGGGTGCA  
GTGGGTTTGCAATGGGTGAT  
TTTATGACACATTGCCATTTTAGCTAAACTTAAATTTCCCTCATTTTACTCGGTGAATATG  
ACCGGATGATCTGTTTAGG  
TAAACAAGTTGAAGTTGCATCTTAAATAAAGGCGGAAAAGTGGGCCGGTTTGGGTATT  
GGGTCTGAGCGGTAAACTTTT  
ATGCATTATACTGGCCAATACATTTTGGTGTGACCGAAGCAATTTATGTGTCAGTTCTTT  
TCTGTCAGTCAATTCTTAAA  
ACATAGTTACGAAATCATATAATCTCCACTTTTTCGGAAAATAATGGTCTAAGAAGTTAT  
TGGGTGTCTTTTCGATTTGTT  
TGACCAGTTCCTTTGAAGCTGATATCTCTTATTTTACCTTATTTAACCGGTAAAGTGT

TTGACCCATTTCTATTTCCA  
TTCTAGCTAATTTATACATCTTTTTATTAACAACCCGTTGAACAATAATAAGTATAAATCG  
AAACCACTTTTTTTAAGGC  
AAACAAGTCTAAATTGTCACCTATTAATTAAAGCCAAAAAGGGTATCATTTTCATACACT  
CATCGTGGATTTTACAAAAA  
AATTTAGGTGATTGCTCAAAATCTAACAACAGAGGAAATTCAAGGGTTAAAATCGATG  
TTCATGAACATGGACACAGACA  
AAAGTGGCACAATCACCATCGAAGAACTTAAAACCGGGTTGGCTAGACTCGGGTCAA  
AGCTCACAGAATCTGAAGTTAGA  
CAGCTCATGGACGCCGTAAGTTGTTTTGGTTTTTCAAAATAGGGAAAATGATAAATTTAG  
GCATCAAAGTTGCCACGTTTT  
CCTTTTCTGGGCATCGAACTTTTTTTTTTCTATTGTAGCACTGAACTTGCCTAATTTTC  
CTTTTGTGACACAAAATCAA  
ACTTCGATGCCCATAAAAGGAAAAATAGGCAAGTTCAGTGCTACAATAGGAAAAA  
AAGTTCGATGCCAGAAAAGGA  
AAAAAGTTCGATGCCTAGAAAAAAAAGTTCGACCGTTAATTTTTTTATTGCACCGTT  
AGTCCTTTTCGTCCGTTTTTG  
CACGTTTTCGTCCGTTTTTGCACGTTTTTCGTCTGTTTTTGCACAGTTTCGTCCGTTTTTA  
CACATTTTCTTCCGTTTTCG  
TCCGTTTTTGCACATTTTCGTCTTTTTTGCACGTTTTTCGTCCCGTTTTTGAACGTTTTC  
GTCCGTTTTTGCACGTTTTTC  
GTATGTTTTTGCACAATTTTCGTCCGTTTTTACACATTTTCTTTCGTTTTTGCACAGTTTCG  
TCCGTTTTTGCACGTTTTTC  
GTCCGTTTTTGCACGTGCAAAAACAGACGAAAACGTGCAAAAGCGGACGAAAACGT  
GCAAAAACAGACGAAACTGTGCAA  
AAACGGAAGAAAATGTGTAAAAACGGACGAAACTGTGCAAAAACATACGAAAACATA  
CAAAAGCGGATGAAAACGTGCAA  
AAACGGACGAAAACCGTGCAAAAGCAGACGAAAACGTGCAAAAACGGACGAAAACC  
GTGCAAAAGCGGACGAAAACGTGC  
AAGACCGGACGAAAACGCGCAGAAACAGACGAAAATGTGAAAAACGGATGAAAAC  
GTGTAAAAACGGACAAAACCGTG  
TAAGAACGGACGAAAACGTGTAAGAACGGGCGAAAAGGACTAACGGTGCAATAATAT  
AATAACGGTCGTTAAAAACAGAC  
GAAAAGGACTAACGGTGCAATAAAAAAATTAACGGTCGAACTTTTTTTTTCTGGGCAT  
CGAACTTTTTTCTTTTTCTGG  
GCATCAAATTTTTTTTTTCTATTGTAGCACTGAACTTGCCTAATTTTCTTTTTGTGAC  
ACAAAATCAAATTCGATGC  
CCAGAAAAGGAAAATTAGGCAAGTTCAGTGCTACAATAGGAAAAAAAAAAGTTCGAT  
GCCCAGAAAAGGAAAACGTGGCA  
ACTTTGATGTCTAAATTTATCATTTTCCCTTCAAAATATGCTTTTCTATATATCAAACATTT  
TTTGAGACTCAGAAATAA  
TGTTTATGTTTCAGGCTGATGTTGATGGAAATGGGTCGATTGATTACATTGAGTTCATTA  
CGGCAAGAATGCATCGACAC  
AAACTTGAACGTGAAGAAGATTTGTACAAAGCGTTTCAGCATTTTGATACAGATGGTA

GCGGGTATACGTTTGAACCTTT  
TTCTAATGTGAGAATCTCATAAAATGTTATTTCTCCAACCTTACTTATGCTCTGAATTCAG  
GTTTATTACAAGAGACGAAC  
TAGAAAATGCAATGAAAGAAAATGGATTGGGCGATGAAGCTACCATAAAAGATATCAT  
ATCAGAAGTTGACACCGATAAC  
GTGAGTTCTTCTACATCGTCATCCTCTTGCTCATCTTCTTCTTCAAGTGTTCAAGTTT  
ATAACGGCAAACATTTTTTT  
TTTCTTTTGCAGGACGGGAAGATAAACTATGAAGAGTTTGTACAATGATGAGAAGTG  
GAACCCAAGGAGCAAAGCTGTT  
TTAA  
>CsCML71  
ATGCTTACACTTGACCCGAAGAAGCGTATAACCTCTGCTCAAGTCCTTGGTATGTTTAA  
GTCTTATTTACATGTTGCAA  
TCTTAATCGTCAAATCGTCATAATAATCATTTATTTATAAATTTTCGTGTCATTTTGAATCGT  
ATAGAGCATCCATGGATT  
AGAGAAGACGGAGAAGCATCAGACAAACCAATCGACAGTGCGGTTCTTCAAGGATG  
AAGCAATTTAGAGCTATGAATAA  
ACTCAAAAAAATTGCACTCAAGGTTTAATTTCCCTTTTAAACAGCATTAACATAACTCGTA  
TATGGCTGTGTTGTATGAATG  
TTAAATAAATGGGCCGGTCGAGTGGGTTTGCAACGGGTGATTTTAGCTAAACTTAAATT  
TCCCTCATTTTACACTGTGAG  
TATGACCGGAAGATATGTTTAGGTAAACATGTTGAAGTTGCATCTTTAATAAGGGCAGA  
AAAGTGGGCGGTTTGGGTAGT  
GGGTCTGAGCGGTTAACTTTTATACATTATACTGGCCAATACAGTTTGTGTTGTGACCAA  
AGCAATTTAAGTGTCAGTTCT  
TTTCTGTCAATCAATTCTTAAATATAGTTACGATATCATATAATCTATGCTTTTTTCAGAA  
AATAATGATCTAAGAAGTT  
AATTGGGTGTCTTTCGATTTGTTTGACCAGTTCCTTTGAAGCTGATATCTCTTATTTTA  
CCTTATTTAACCAGTTAAAG  
TGTTTGACCCATTTCCATTTCATTCTAGCTAAGTTATAGTAGTACATCTTTTTATTAACA  
ACCTGTTGAACAATAATAA  
GTATAAATCGAAGCCACTTTTTTTAAGGCAAACAAGTCTAAATTGTCACCTATTAATTAA  
AGCCAAAAAGGGTATCATTT  
CATACACTCATCGTGGATTTTACAAAAAAATTAGGTGATTGCTGAAAATCTAACAACA  
GAGGAAATTCAAGGGTTAAAA  
TCGATGTTTCATGAACATGGACACAGACAAAAGTGGCACAATCACCTACGAAGAACTTA  
AAACCGGGTTGGCTAGACTCGG  
GTCAAAGCTCACAGAAGCTGAAGTTAGACAACCTCATGGACGCCGTAAGTTGTTTTAGC  
TTTCAAATTCTAAAGATCATTC  
TTTATATACCAAACATTTTTAAGACTTCAAAGATTGTTTGTGTTTCAGGCTGATGTTGA  
TGGAATGGGTGATTGATT  
ACATTGAGTTCATCACAGCAACAATGCATCGACACAACTTGAACGTGAAGAAGATTT  
GTACAAAGCTTTTCAGCATTTT  
GATACAGATGGTAGCGGGTACGCGTTTGAACCTTATTCTAATGTGAGAGTCATATAATAT

GTTATTTCTCCAACCTTACCT  
TATGCTCTGAATTCAGGTTTATTACAAGAGACGAACTAGAAAATGCAATGAAAGAAAA  
TGGATTGGGCGATGAAGCTACC  
ATAAAAGATATCATATCAGAAGTTGACACCGATAATGTGAGTTTTTCTACATCGTCATCC  
TCTTGTTCTTGTTCTTCTTC  
TTCAAGTGTTCAAGTTTGTAACGCAAACATTTTTTACTCTTTTGTAGGACGGGAAGATA  
AACTATGAAGAGTTTTGTACA  
ATGATGAGAAGTGGAACCCAAGGAGCAAAGCTGTTTTAA  
>CsCML72  
ATGACTCAGTGCTTAGAGGGGATCAGGCATTTACTTGCTTCCATATTGCGCTGCTGTGA  
TCTTGAATTGTACAAACAATC  
AAGAGGCCTCGACGATCCTGAAATTTTAGCTAGAGAGACAGTGTGTATGTGACTAGTC  
TAACATATTACATTCCAGAATT  
TGATAGTTTTGAAATATTGTACTTTTAACATATAAACCCTGATAGTTTTGAAATAATCCA  
GAAGTTGACGTCATACTGA  
AAAAGGCTATGTTTTGCTCAATGCAGTTAGTGTAAGTGAAATTGAGGCACTTTATGAGT  
TATTTAAGAAGATTAGCAGTG  
CAGTTATTGATGATGGTTTAATAAATAAGGTCATACTTTGTTTTATTCTTTTTACTTATT  
CTTTAAATCCGTGCAATA  
TCAGCCCTGTGAAATTACCATTGATGTTTCATCTTACGTTGCTACACTTTGTAGGAAGAG  
TTCCAGTTGGCGTTGTTTAAAG  
ACTAATAAAAAAGAAAGTTTGTTTGCTGATCGGGTATGTCCTCTTTAAGATAAATAAAA  
CAGTTTAGCATTATAAATAAG  
TGTTCTATAAACTCTCTTTCTGTTGCTCCACTCAGGTGTTTGACCTATTTGACACAAA  
GCATAATGGAATCCTGGGATT  
TGAGGAGTTTGCTCGTGCCTATCAGTATTTATCCTAATGCTCCTATTGATGATAAGAT  
TGAATGTGAGTTAAATTTTA  
TTTCTTCTGGTACTAGATATAGTCATGTAGACTTCGGCTTGCTGTTTGTGATTCCTTATTG  
CATTTGTTATCCTTTTGTT  
GGCAATCTTTTAAGCTAATGTTAAAATTTGCCCAGCAATATGTTATTGATTTTGGTCCACA  
AAATTCATTTAGTTTGAAA  
ATTAAGTGAAGGTATTTAGACATTTGGCCAATTTTTTAACACTTGCATAAGTGATTGCTG  
CAAATTTTCGTGAGTTCTTGG  
TATATGGTATGATTAAGAATCTCTTATTCAATTCTTCTTTCTTTGCAGTTTCCTTTCAATTA  
TATGATCTTAAGCAACAA  
GGTTTCATAGAGAGGCAAGAGGTAAAATCATTTGTTCTTTTGTACATGCAACATAAACC  
GTTTAAAGGTTGGCTTTTCTG  
GTGTTAAGTAAGATTGCTCTGTTTACAAAGCTATCCTAGATATGCTTATTATACGATTTA  
ATTTATAGGAATGAAAGTA  
AATGGTTTTGAATATATATTAATCAACAAGGCTTATCACAGCTTAGTGGTTCAAGCCTGA  
CATGGATTAGAGCCAACTCA  
ACTGCCTGCCAAGCCAAATTCGAGCTATGATTCTCGTTAAATTTTATATTCCGTTTTCCC  
TAGAGAAAGGGTCACTTTAC  
AGTCCTGAGAATATAAATAGAACTATTTAAAATTTTATATTAATAGGATAATATTTAC

ACATAGTAGTAAGACTTTA  
TGCTGTTAGTATTGAGTTCAATTGCCAATTTGACAAGTTTAATTCTTTTTATATATTAGTA  
ATTGTCAACACACTCATCA  
TTCTGTCAACATGTAGGTAAAGCAAATGGTGGTAGCTACCCTTGCTGAGTCTGGCATGA  
ATCTCTCAGACGATGTCATAG  
AGAGCATTATTGACAAGGTACTGTAGCTGATCAGGTTTTTTGGTTCTAACGACAAGTGT  
GTTTATTCCATGTTATGGCTT  
ATTTCCCAAATGCGTACAGTAATTTTTGAGACATTTTATAAGGGAGGTAACTCATTAAC  
GCTATTTTTCTATTCATTTT  
ATTGACTTAGCACACCAAATGAATTTAAATGATAGTATTTTTTTGCTGACGTGATTTCAA  
AACAAATTAAATGTTACCCA  
TTTGACCCGTGGTCAATGATATATAACCCATTTTCAGATAACTGGGATGAATTTGTCCTC  
TCTAGGTTTCAAGACAATTG  
AGATGAATCTTGTAGATATAACATAGTTTTAGTTTCAGAAATATACAGTTCCACAGAAT  
GACTAATGTTTTTTACTTTG  
TTTAGACGTTTGAGGAAGCTGATACAAAACATGATGGGAAGATTGACAAGGAAGAATG  
GAGGAGTCTTGTATTACGACAT  
CCATCGCTTTTGAAGAATATGACGCTTCAGTACCCTTAAGTAAGTTCCATTTCTTATTA  
GTGTTGTTTTTTTACTCTGT  
AAATGTTTGGCAGTTCACACAACTTTCGTTGTCTATAAAGACCTACATGTGAAATAA  
CCTCGAGATAATCAAAAGTAC  
AGAATCAGTTCTGTTGCAACTACTCCTAAAATGATTATCCGAAACAGAATCGTTCTTCA  
AGTAATCACTAATCAGATAAT  
CATAATCATCTTGACTGTAACCAAACACGAGAACTCATTATCTGCACCCACTTGAAAA  
CTGGTATGATCATAATTATAA  
TCGCTTTCAATACACACTGCAGAAAAGAACGCAATGCCAAACATCCCTGAACCCTAAC  
GGCCTAAAGTCATTGACTCCCA  
TTCATTCAATTATCAGTGAGTCAACTGGACTCATCCGGCACCACAGCCATATGAATGCTG  
CAAAAAGGGCACTTGGCCTAA  
TAAGTAGTTAGCCATTAGCATTTGAAGCCATTATATGTTTTTCCTCACCAAACAACCAAC  
GTATTTGCATAAAGGAAATA  
GTTGCTTCTACTGGCAAAGAACTGACTAGTTCTTCTTTCTTACCCTTTTAGCCAGAA  
AATAAGAAAGCTGTAAATCT  
TCAATCTTACTTGCAAAGTTTGAGTTGATGGACTGCACTCATTTAAGTTTTGTAATTATC  
TGCAGGGATATCACGACGAC  
ATTTCCAAGCTTTGTTTTTCACTCGAGAGTTGAGGATACATAA

>CsCML73

ATGGGTTTGAAAAATCTCTTAAATCGAAAGAAGAAAAAGAAAACAGGAGATGATAAC  
AGCACTCACGAATCTGAACCTCA  
ATCTGAACCCGCGTCACAAACAACAAACACGTCTGAATAATATCAATGCCGAGGCATCG  
CAAGCCAAGTCTTTGGATTAC  
GCGTACGTATTGAAGAGGAGCTAGAGCAAGTTTTTAACAAATTTGACGTAAATGCTGAT  
GGAAAAATATGCGCGGCAGAG  
CTAGGATCCATAATGGGAAGCCTTGGACACCACCCGTCACAAGAGGAGCTAAAAAAC



ATGATCAAGGAGGTGGATGCAGA  
CGGGGACGGCTTCATAAATTTGCAAGAATTTATTGAGTTGAACACGAAAGATATTGATT  
CGTCTGAGGTGTTGGAAAATC  
TAAAAGACGCGTTTTCTGTTTTTGATATTGATAAAAATGGCTTGATCACTGCAGAGGAG  
TTGTTGAATGTTTTGAGTAGT  
TTAGGAGAAAATTGCACTATCACCGAGAGCAAGAAAATGATAGCTGGTGCTGATCGTG  
ATGGCGATGGTATGATTAACCTT  
TGACGAGTTTAAAGGATATGATGATGTCTGGTTCTCGGTTTGATTCTGGGTTGCAAAAAC  
ATGAGATAGCGAAGGAAGATT  
AA

>CsCML74

ATGTCACCCGAAACATCCAACCAATCGCCATCCGTATTCCCAACGGACAAAGAAGAAA  
TCAAGACCATCTTTAACCGTTT  
CGACACAAATGGTGATGGAAAGATCTCTGAGGACGAGCTAATCAATGTCTTGAAATCA  
CTAGGATCCGACACGTCTCCTG  
AAGAGGTCAAGCGCATATTGACAGAAACTGATACCAATTCTGATGGTTTCATTAGCCTA  
GACGAGTTTGTTGTATTTTGC  
AAAGGAATTGCGGGTGAATGTGATGGTGACGGGCTTAATGATCTTAAGGAAGCATTTA  
AGCTATACGATCAAGATAATAA  
TGGAGTCATTTAGCTAGCGAGTTGCATCAAATATTGAGCGGAATGGGGTTGAATTACA  
CGCTTAAGGATTGCGAGAATA  
TGATTAACTCGGTTGATTCAGATGGTGATGGTTGCGTCGATTTTGAAGAATTTAGGAAA  
ATGATGTCTGAAGAATTAA

>CsCML75

ATGGCCGAAAAATTGACAGACGATCAAATTACCGAGTTCCGACAAGCATTTTCAATGA  
TCGATAAAGATTCTGATGGTAA  
CTTCTATCTTTTAGCTAACTATATTTAACACCTAATAATGTTTCATGTAACAAACAAGAG  
GTAATAGGGTCCGTACCGC  
ACTAGCTACACATTTGAGGGTGTTTCAGAGAAAACGTCGAACATAAATGAAGAATGCAC  
TTAAGTTAGATGATTGATAGCT  
TTACGTGAACATGTTTACTTTATTGTAGTTTTATAAAATAATTAACGTTGCGTTTTTACT  
GGCAGGATTGATTAGTACA  
GAGGATTTAATAGGCGTGATTCAAACATTGAACGAAAACGCTACTAATGAAGAGGTTA  
AAGAAATGATGAACGAAGTAGA  
TACAAATGAAGAAGGCACAATCGATTTCCATGATTTTCTTAATATCATGTCCAAAAGAG  
TTAAAGTAAGTACTCGAAACA  
CCCTTGAGATATACATATCATGCAAACATATGGAATGCAGTTTGTATTTACAAAAAATAT  
AAATAATGAAAAGTTCGTAG  
GAATGACTTGTGGTTTCATATAGCATGACCTCTAGCTTTGTAATAATCGTTACTAATTTAT  
GGTAATCAACAGGAAAATG  
CGAGTGACGAGCTAAAAGAAGCTTTCAAAGTATTCGATCGGAATCAAGATGGTTACAT  
TTCACCTGATGAGGTACTTGTC  
ACTCTCTAACCTCCCTCAAGTTTGTATGTGCTCTTCATCATAATATATGGTTTCATAGCGT  
TAGTTATAAATATGAAAAT

AATGAGTTCATTAAATGTTATTTTTACAAAAATGATAAGGCTTAACCATAACCCTAGCTA  
GCAAAACCCTAAACTTAAAC  
ACATGGCTAATATTAGCTTAGCCGGCCCAAATTAACATAAATGGGCTAATATCTATGGAT  
TGTATTGAAACTTTGTAAGA  
AAATGCAACCGTAGAATATGCAAAAAGTTGACATTTTTATTGACGTACTCCGTTTCATATG  
ATGTGCAGTTGCGAAATGTT  
ATGATAAACTTGGGGGAGCGATTAAAAGATGAAGAGCTGGAGCAAATGATGCGAGAA  
GCTGATCTTGATGGAGACGGTGT  
TATAAGTTATGATGAGTTCGTTCTGGGTATGATGAACTCCTCCTGA

>CsCML76

ATGTTTGATCATGATGGTGATGGTAACATCACCATACAAGAGCTATCAAAGTCTCTTGA  
AAGCCTTGGTATGGTTATACC  
CGAGAAAGATCTTGAAAACATGATCAAACATATTGACACAAATGGTGATGGTTCCGTG  
AACATGGAGGAGTTTAAAGGGT  
TGTATGAAACAATAATGGAGGAGAAGGACGAAGAAGAGGATATTAAAGAAGCGTTTA  
ATGTTTTTGACAAAAACGGAGAT  
GGGTTTCATCTCGGTTGAGGAGCTTATGTCCGTTTTAACTTCACTTGGATTTAGACAAGG  
TCGAACCATCGAGGATTGCCA  
ACTTATGGTCAAGAAGGTGGATGAGGATGGCGACGGGATGGTTAACTATAAAGAGTTC  
AGGCAAATGATGAAAGGTGGCG  
GCTTTGCATCAATGTAA

>CsCML77

ATGGGAAACGATGATCATCTTAAAGATGCCTTTGCATTCTTTGATAAAAACAAAAGTGG  
GTACATAGAGATTGAAGAACT  
AAGGGAAGCCTTATCCGATGAAGATGAAGCCAACAGTGAAGAAGTAATTTCCGGCAATC  
ATTCATGATGTAGACACCGACA  
AGGTTTGATTTTGCATCTTTCATTTCTCATTTGTTGCTCTTTTATCTAATTTAAGAACTT  
AGACTAAATTAGCATCACA  
AAAATTGGAAGGGGTGATTGTTCCGGGTAGCCTCTATGTGCTTCCCCACTATATATTTG  
TGAAGCCTTTTACTAGTCTA  
GTTTACCTTTTATCTGTATGTTATTCTATGGTGAGTCTATTTTAAGATACCGAACTTACCT  
AGAGAATCAGTGGGCATAA  
ATGGGGTTTGCTTCAATTATAAATGAGTCCTTGGGTGCTGTGTGCATGTTGAGTTTGCT  
ACTTCTAATAGTTAGGGACT  
TACAGTAATAATCACTGACTATCTTTATAACATCTCAAGTTCAAGTATCCAATTTATACCT  
ACCCACATCATTAGTTAGG  
CATGCACATGCATAACCAAGTTCTTTTTTGTAGTACAGTGTATAAGTTTATAATTATTACG  
AGATTTAATCATAGTTTCA  
AGTCCATGTGGTTTGGCCATATACCTGCCTTAGTCATTAAGTTTGAAGTGTTACAATCAA  
AATCCCTACTTCTGTAAC TA  
AATACGTGTTTTATCCTTCAGTCACTGTTAATCCCTTTCAGTTAATGCTCGCATGGGCGT  
TGCACTCGAGGGTAATCTAG  
TCCTTTCCGCTTCCATCTTTAACAAATATGAATTGTCTTTCTTCACTTAAGGGTATGATGC  
GAACCGAAACGACGTTTTT

AAAAAAGTTTATCATGAAACTTTAATTTTAACAAATCAAGATTGCTACTATTGTCAGATT  
CTCCATCATATGAAACAAGA  
TATTTATTAAACCTTTCATACCTATGAACATGTCTACTTAACACCTAAAACCTTGCAAAT  
TTAAGATTGCAACAACAGTT  
ACCAAATTTTAAAGATGGAAATGCATGCACCTTGTCTTAATAAATGAACTCGACCACGT  
ATGTAAAGTGTATATATTGTT  
TATTCCTTGTTTGATATGTTTCAGTTTCGACCATATCAAAATTACACTTACACATGTCATTA  
AGATAAGGCACATGTGTTT  
TTCGTTCTAAAAGGCCATTAAGATGATGCACATGCATTTTTGTCTTAAAATCTTGATTG  
TTGTTTTTGTACTTTGAAC  
TTGATTTGCAAGGGTTTGCGGTTACTATGTTCAAGTAACTATGTTTTTAGTATGGAAGGT  
TTGTAAAATATATTGATACA  
AATACTCTAGAATACGAAAATAAGTGCAATTTTAGATTGTTATCATTAGAGTTTCAGTAT  
TCATATCATAATCCAAGACT  
GCTTAAGTTTGAATAATACCGCTTAACTGGAACACAACCTCAGATGGTTGTAAAAAATAC  
GAGGGGAAGAGACAAGATTGT  
CTCGTGCGTAAACACACGTAAGGACGGAAATGCGGAACTGATAGGGATAGCGGTTGCCA  
ACTCTTGATCGAGAGGTGCAT  
CATTTTAAAATTAGGGTCTTGACTTAGGGACTCTGTCCCAAACCTTAATCAACTATATGT  
ATTATTATTCAACCCTGAT  
CATGCATACCCTAGTTAGAAGGTCACAGAACATCAGTCTTCTACCCGAACAAGTAGGTT  
GACTAATTAGAACTCTTGGC  
TGATTTGTGCAGGACGGAAAGATTAGTTTTGAGGAATTCACGGCAATGATGAAGGCGG  
GAACGGATTGGAGAAAAGCATC  
ACGACAATATTCGAGAGAAAGATATAATAATTTGAGCTTGAAATTGTTCCAAGATGGAT  
CATTGGTTTTAGCAAATGAGG  
GAAGATGA

>CsCaM4

ATGGCGGATCAGTTGACCGATGATCAGATCTCTGAGTTTAAGGAAGCTTTCAGTTTGTT  
TGACAAGGATGGCGATGGTAA  
CATCCCCTTATCTTTATTGTTTGTTTGAGATTTGTTTATTGATTGTGTTTTAATGTTTG  
TGTTTTCATCTGATGTAA  
ATGATGATCTGTTTGTTAACTGTGTTGAGAATCTCATAAGGGGTGTTTGGATAAGTTTA  
TTTATGTGCTATTAGGTTAT  
TCTGATATTGTGCTTTGATTCTTTTCAAAACACAATAACCAAACACACCCTTATTGGAA  
ATAATGTAAAGAATCAAATAA  
TTTAGTACCTGAAGGCTTTTTTTGTAGTTGAGAATTGATTTTATTATTTGCCGTAACGTT  
AAAAAATTTATTCCACCCAA  
TCTCACCTTTCAAACAACGTTAAAAAAATTACTCAGTTATAACCGTTATCACGGGAACC  
AGCCTCTTCAAAGGGATGGGT  
GTAGTAATGTGGGTTTGTGCGCTTCGAGCTGTTTTACGCGTCACATCTCATCTCATAATT  
GTTTTTGAACACCATTTTTA  
TGTTTGACGGTAACGATGTCTCTTGCTCCACTCTACATTCATGAAACATGAGAAAATAA  
TTATTACATGTGCATCAATAG

ATCAAGTAATTGTGCATTATAGTTAGGCTGATCCTTGGTCAAACGCGTAATTCCATTCCC  
TAGGATATTCCCTTTCATAA  
TTGTTGTTCTAGTCTCGTGAATGCATCAAATGTTTCCTCATGCGATGCCTCCACTTTTTA  
CAATGGCATTGACGTGTAA  
CAAAAACATAACTACCTTACCCTAGCTCTCATTACACATGTATTTATGGCCATTATGAAC  
ACATTACAATGGCAGTGTAC  
TTTATAGTTAGACGCTTGACACGTCGCTGTTAACTAACAGTTAACCACCTTGTACTTTG  
CATATAAAAGAGAATGTCTCA  
AAGGAGTAAATGCCGTCTCGTGCAATTAATGTGATACACATTCACGAGAGCATTTACTC  
CTCCAAAGAACTAAGTCCCTG  
AATCTATTCGAAGTGTTAGCATAGTTCTTACTTAAACACCTACTTTTGTAGTGTTTAA  
GTTAGTGAGGAGATCGCCAT  
ACATTGTCATTCAACTTAGATTTTATTCGCAAACAATTTTAGTAAATTCTTTGATTGTTT  
TCTAATAAAAATTTAGGGG  
CAATTGCATATATATCCCTCCAAAGACTAAAAATTGCATATATATCCAACATAAACTTAAA  
ATTGCGTATATATCCTTCT  
TAAACAAAAAAATATCACATATATTCAAATAGTTATTTTATTTATAATTACAACACAAA  
AATGCAAGATAATTAAAATT  
TAAATACATAATGACCATTATACCCTTTTATTTATCATTCTCATAATTAAAAAATATCATC  
AAACATTTTTTAATTTTT  
TTTTAAAAAACAAAAAAGAAAAAATACTTCACTGAACACCAAAATGACACA  
AAAAAAAATCATTATAATTGAC  
TCATTGAGCGTATATCATTAAGAATTAATTTTAAATTCATCAAAAAATTAGATGATATAT  
CAAGATGTTTGATGTGGAC  
TCATATACAGTTTATGTTTTTCATTCAAGTATTAATTTTAAATAAAGATCGTATGGTTGTAA  
ATATCTATAGGTTGTGTGT  
GTTTTTGGCAGTTGGTTATAATCAATTAATAATTCAACAATAGGAAACATACGAACAAGC  
GAAAACAAGAACAATAATGAA  
AAAATTAGTTTGAAAAGTTAGTACAGTCAAACCAATTTACGGGATTCAATCTAGAGTGC  
AGAGTTAATCTGTGTGTGGAG  
ATTGTTATATTCAAACCTTGTGTATAGATTTATTATAAGTAGAGGATATAATGGTCATTTTGT  
ACTTTAATTACAATTATT  
ATGTGTTTTTTGTTTTTAAATATATAGAAAATAATTATTTGGATATATATGACAATTTTTGT  
GTTTGGGAAGGATATATA  
CGCAATTTTAAGTTTATGTTGGATATATATGCAATTTTATGCTTTGCAGGGATATATATGC  
AATCCCCCAAAAATTTA  
AACGTTGAAAAACACTTGTGCAATTCTTTCAACTAAACGGGAACAACAATATGTTTAAT  
CGTTATTGCGGGATAACATTG  
CTTAGTTGGCTTTATACTGTGATAATATGATTTGCTTTTAAATTTTATACTTAAAATGCTACT  
TAATACTTACTCCTTGCA  
ACACCTTTTGTTAGATCATTAATAATTAAATGGTCTGATCATTCATTTGTGAGGCTATGACT  
ATCCCCTTGTGTCATGCGTG  
TACATTTTGACCCGTTTACATAGAATATAGTGATTGTTGGGAAAGTTCCTCAATGTCAAC  
CTTCTATTTTGCCGTATTCA

AAGATTTAAATTATTATTATTTTCTTGCAATCATAATTAACCTCACGAGTTATTTATACCCT  
TTCTATAAATATCGGATC  
AAGTGTGTTGGTGGGTCAACCCAACCTGGCTTGTTGCGAAATGTACTAAAGATTTACTGTT  
TAAACCCAACCTGTTTTTGG  
ATTTGTATTTTGGGGGAGATATTATCTGCGATATATGTGGAGAGAACTAAAATTATAAAA  
AAATAGGTTGAGACTTGATT  
TTTGAAAATTTGGTTTTGTAAAATCCAATCCCAATATCCTCGAGCTCATTATACGGCTGC  
GTTTAATCAGAAAACAGTTC  
TATTCTTTTTTTAGAACTTGTGAGTTGACAGTGTTATGTTTTTTAATGGTTCTCGTGGA  
TTACCTATGTTTCAGGTTGCA  
TCACCACAAAGGAGCTTGGGACTGTGATGAGATCCCTAGGGCAGAATCCCACAGAAG  
CTGAACTTCAGGACATGATTAAT  
GAAGTTGATGCTGATGGAAACGGAACCATTTGATTTCCCTGAGTTTCTAAATCTTATGGC  
CAGGAAGATGAAAGATACTGA  
TTCAGAGGAAGAACTTAAGGAAGCATTCAGAGTTTTTGACAAGGACCAAAAATGGCTT  
CATTTCTGCTGCTGAATTGCGTC  
ACGTTATGACAAATCTTGGTGAAAAGCTTACTGATGAAGAAGTTGATGAGATGATCCG  
AGAGGCTGATGTTGATGGTGAT  
GGTCAAATCAACTACGAGGAGTTTGTTAAGGTTATGATGGCCAAGTAA

>CsCML78

ATGAAGCTTCCCGCCAAAATCAACCCTAAGCACATCTTCCGATCAAGAAAACACAAAA  
CAGTCACCAGATCTGATCAATC  
TTCATTGAGTTCCCTCCAATACGACGTCGTCAGACTCGCCAGAATCCAGTCATCACCGTC  
GCAAGGCCAATACTTCCGGCG  
TCACTACTCCGACGAGCGTCCTTCCTTCCTCCGCCGACGACTACTCCGACCTTCAACTC  
GACCTAATCCAAGCCTTCCGA  
TTCATCGACACCGACGGCGACGGAAAAATCACAACGCAAGAACTCGAAACGATCCTA  
AACCGTATCGTAAGATCTGAGCC  
GTTGATTCAATCAGAGCTGAAATCGATGTTAACCGAGATAGACAGTAACGGCGACGGC  
GTTATCACTTTAGAGAATTTG  
GAGCGGTTAGTGAAGCTTTTGGACCGGCGGTTGGCGACGGAGAGTTAAAAGAAGTGT  
TTGAGTTTTTTGACAGAGACGGT  
GACGGAAAGATAACGGCGGATGAGCTGTATGAGGTTTTTGTTCGCTAGGTGATGGGA  
AGGTGACTGTGGAGGAATGTGT  
TGGCATGATTAAAAGTGTTGATGTTAATGGAGATGGGTTTGTGTTTGTGATGATTTTAG  
GAGTATGATGGAACAAAGAT  
GA

>CsCML79

ATGAGCACATACAAAGACCGAAGTTGCCGCGGTAAGATACCCTTTTATTTAAATTTTAC  
GTCTTTGTTGTACAGTATCGT  
TTTGATAGTTTTGGGGCCTTGAAAGTATCAATAATTGATAGAAATTTCACTCGTTTATAA  
CATTCCTTCGTTTATAACATT  
CTTCGGTTATTTTTGAAAACAACATCGATTTTTCTTAAATGCATCTTAAATGCACACAGT  
CCTTTAAAATGTGTTTCCAA

TATTACAGTTCAAAAGATTTTGTGCACCCGTTTCATATTTGTTCCAGGCTCCGTCCTATGA  
TTAGGACATTTGACCGTATT  
GCTTGTGTTTGACAAGGGATGTTTTTCCCCACTTAATGAGTAGGCTTAAATCTTTGTTT  
CTTTTTATCGGGGAGGTTCA  
CAAAACTTTTCTTTTCAATTAAAACGCTAAAATAGAAATGTTTCAGAACCGCTTAATTT  
TAAAAACAATCTTTTAAAGTT  
TCATCACTCCTCAAGCCATGTATCTAACTAAATGCCATTCACAAATTATAAATTTTCAA  
TTTTTGTGTGGTTATATTTT  
AAGTTTCTTTTTGTTTTTCAAGGGAGTCGTGTATAATTTTCCTTGCTTCCCTATTTGTT  
TTACCTTAAAAACAAGAAA  
TTATATGATTGAGAACATGGTCTAACATGCTTTGCTAATTCAGTAATTCTAGCTCTAGAA  
ATGAAATTGATAAAAAGTGT  
AGTTAGCGTGAATTTTTTAACTACGTGCATTCTGAAAGTGGACTAATAAATTAAGACG  
GAGGGAGTAGAATTGCTTCCC  
CAATATATATTGTTCAATTTGTAGAGCGTTTTCTTGATCCTTTTCACATATACTCAGTAATA  
AATAATTGGTATAATTAG  
ACTTTCAGTTTCTATCTCACCAAATACATAGGATAACAATATTATCATGTCTGATTGAGGT  
AGAAAATAGACAATTATATG  
AAAAAGTCAAGAAGTACATGTAAACATGGCATGCCCACTTTTTTGCTTTGCCCTTTTCT  
CATAATAATGTTTCAACATCT  
ACCACAACCTTGCTTCAATACAATTCTTGATAATCATTTAGTTTCTTGCTTTTTCTCTAGC  
TACATCTCCAATGCCTAAA  
TCCTTGCAAACACGCATAAGGAATCTCCTTAAGAGAGTCAACTTCTTAACCAAAGTCA  
ATAACTTCAAGAAAAAACCACC  
CAAGAATCCTTGTGTTCTAGATGCCATCTCATCATTTATAGCCATGGATGTCTCAAACCA  
ACTCAAGCAAGTCTTCAAAT  
TCTTCGATATCGACGGTGATGGCAAGATTTCTCAAGTGGAGCTCACAAATGTTTTGTTG  
ACTTTTGGTCAAGAGAAGTCA  
ATGGCCACAAAAGAAGCTCAAGGAATACTTAAAGAAGTTGATTTAATGGAGATGGTT  
TCATTGACTTGATGAATTTAT  
GACCATTATGGATGGTTCCAAGCCGGTTTTTCGCTAGCTCAAAGGAAGATAATGGTGATG  
ATGATCTTAGAAATGCTTTTA  
TGGTTTTTGATAGTGATAAAAATGGACTCATTTCTGCAAAGGAGTTGCAAAGTGTGCTC  
ACTAGTCTTGATGTAGTAAT  
TCCAAACTTGGACAATGTAGAAAAATGATTAAAGGTGTTGATAAGGATGGTGATGGATT  
TGTAGACTTTGATGAATTTAA  
GTCAATGATGTCCATCGGGATTAAGTAG

>CsCML80

ATGGCAGAAAAAAGCTACCAAGACTTGCTTCCTATCATGGCTGAAAAGCTAGAGTTAA  
CAACCTTCATGGAGGAGTTATG  
TAGCGGTTTTTCGTCTGCTAGCTGACGAAAACACCGGCCTGATCACCCCTGAAAGTTTG  
AGAAAAAATTCAGTATATTGG  
GTATGGAGGGAATGAGCAAAGAAGATTCAGAAGGTATGGTGATCGAAGGAGACCTTG  
ATGGAGATGGTTTCTTGAACGAA

ACCGAGTTTTGCATACTCATGGTGAGACTTAGTCCCGAAATGATGCAAGATGCTGAGAT  
GTGGTTGGACAAAGCGATTGA

AGATGAGATCAAGAACGTCTCTACTTCATTACCAGATAATAAAGTTTAA

>CsCML81

ATGGCATCAACCAATAATATGCAATCTGAGTTCCAAGATTACTTGCCATTAATGGCTGAT  
AAGTTGGGTGGTGATGGTTT

AATACAAGAACTATGTAATGGGTTTTAGTTACTTATGGATCAAGATAAAGGGGTGATTA  
CTTTTGATAGTTTGAAGAAGA

ATTCATCAGTTTTGGGGCTTGAAGGATTGAGTGATGATGAAGTCATGAGTATGCTGAAA  
GAAGGTGATTTTGATGGTGAT

GGTGCTTTGAATCAAATGGAGTTTTGTGTTCTTATGTTTAGATTAAGTCCGAATTTGATG  
GATCAATCTGAATACTTGTT

GGAAGAAGCTTTGGAACAAGAGTTAAATAATTTTCAATACTGA

>CsCML82

ATGAGTCAACTAAAATCATCGTCGTTTCGTCTTAGATCACCCCTCGTTGAATTCTGTCCGT  
TTACGTCGTATTTTGATTT

GTTTGATACCAACCATGATGAGTTAATCACGGTTGATGAACTTAGCCGCGCTTTGATAC  
TTTTGGGACTTGATACTAATA

TGAATGAATTGGATTTCGATGATTAATACGTTTATTCAACCAGGGAATGCTGGGCTTACGT  
TTGATGATTTCCATGCTTTG

CATAAGGAAATTGATGATTTGTTCTTTTCGTCTTGATGATAATGATGATTTAGGTACGTTG  
TATATATGTCAATTATTAGT

TTTTATGATACGAGTCGTTATATAACTTCTAATGTTTTTCGTTTATTTGCTAAACGAACGTG  
AACAAGATTTTATGTTGGT

TAGCAAATCAAATAAACTTACGAAATAGTTATAAGCATCGTTCCTTCATTTATGTTTATG  
AAAGGTGGCTAAGGTTTTCA

TGCTTTTATATTATATCGATATCACATCTTTTAATCATAATTGAATTTATATGTTTCATTTAA  
TGTTTATGTTTCGTTTCAT

TTTTTCGACTAAACTTTAACTAGTTGACACAGAGGCGGATCCATGTGTTATCAAGCGGT  
TTTCGGGAACCACTTTGGACA

ACGAAAACCTTCTAAAAGCGTTATAGAAATTTCTTAGGAACTACCTTTTAAATATTTG  
GGAACATAATTTTAAAAAAATT

GGAAAAATACTTCACTTTTAGTATAAAATATTCTTAACCCAAATCTTAAATAGCCCCAAA  
AAATTAGTCCATTTAACAAT

TACTCCGTAATAATTAACTTTAAGGGCATAAAAAATCCATTAATCGGCAATTCTAGTACT  
GTAGAAGGAATTAGGGAAAC

GAACTCGGATAGTCAACTCACTTCATTCAACAATCCATATGTACGCTATTTGTCTTTTAC  
GAGTAGTTTATTTATTCATT

CTAGTTTTTATGAATAATTAAAAGGAATAAACAATGTTATGTAATGTACACTGTATTAGTA  
TAATTGTTTGAAGATTATT

TAGATTTTAGGGTTTGTGTTTAGGACTTTAGTCTTTAGGTTAATATGTTATGCATCATGT  
GATTGTTGATTAAAAGTTT

GAATTTTGGTATTTGTTTATGTTACAATGTTGAAGTTCTTAACCGAAAAAGGAGCATT  
AGTTCAATGTTTTATTATCGC

ATCTTGTTAAATTGGACCCGATCCGACCCGAAAATTTGACCGGTTGGTTAGTTGACCTA  
TTGCAATTTTAAATTTGATCA  
AACCAAGGAACCACTTTGAATTTCCGGCTAGATCCGCCTAACTGTTGACACAAACAAG  
TTTCGTTTACGATTTTTCATTT  
CGTTTACATTGATAACTATTTATAAAACATGTTCTAGAATTTTAGGGTGGAAAACTAAT  
TAACTATGTATCCTTTTTAT  
GAAAATAGGTAATCAAGATGAAGATAACGACGAGGCTAATGGCGATAAGCAAGAGGA  
GGCGGATCTAACTGAGGCATTTA  
AGGTTTTTCGATGAAGATGGAGATGGCTACATATCAGCGACCGAGTTACAACTGTGCTT  
GTGAAGTTAGGGTTTGCCGAA  
GGTAATGAGATTGGAAGTGTGGAGAGAATGATATCATCCGTTGATCGAAATCATGATGG  
ACGTGTTGATTTACAGAGTT  
TAAAGACATGATGCGTAATGTGATCGTTCTCAAGTAA
